# Supplementary material for: Substantial microbial community shifts in response to an exceptional harmful algal bloom in coastal Southern California
Source: Oxford University Press journal article supplement (doi:10.1525/elementa.2021.00088), 2022-01-01
Supplement: suptable.xlsx [file suptable.xlsx]

## Sheet: Sheet1
Sequence	Subnetwork	MM	P-value		Edge Identity			SuperKingdom	phylum	clade	class	order	family	genus	species	strain	taxon						moduleName	18_Month_Subnetwork	18_Month_MM	18_Month_P-value			moduleName	NoBloom_Subnetwork	NoBloom_MM	NoBloom_P-value
CGTTGTTCGGAATTACTGGGCGTAAAGCGCGCGTAGGCGGACTATTAAGTTAGAGGTGAAATCCCGGGGCTCAACCCCGGAACTGCCTTTAATACTGGTAGTCTTGAGTTCGAGAGAGGTGAGTGGAATTCCAAGTGTAGAGGTGAAATTCGTAGATATTTGGAGGAACACCAGTGGCGAAGGCGGCTCACTGGCTCGATACTGACGCTGAGGTGCGAAAGTG	Bloom	0.96361	2.28826e-138		Proteobacteria_6079			Bacteria	Proteobacteria		Alphaproteobacteria	Rhodobacterales	Rhodobacteraceae	Oceanicola	Oceanicola sp. D3		Oceanicola sp. D3						Bloom	NA	NA	NA			Bloom	NA	NA	NA
CGTTGTTCGGAATTACTGGGCGTAAAGCGCGCGTAGGCGGACTATTAAGTTAGAGGTGAAATCCCAGGGCTCAACCCTGGAACTGCCTTTAATACTGGTAGTCTTGAGTTCGAGAGAGGTGAGTGGAATTCCAAGTGTAGAGGTGAAATTCGTAGATATTTGGAGGAACACCAGTGGCGAAGGCGGCTCACTGGCTCGATACTGACGCTGAGGTGCGAAAGTG	Bloom	0.897073	2.20158e-86		Proteobacteria_6070			Bacteria	Proteobacteria		Alphaproteobacteria	Rhodobacterales	Rhodobacteraceae				Rhodobacteraceae						Bloom	NA	NA	NA			Bloom	NA	NA	NA
CGTTATCCGGAATCATTGGGTTTAAAGGGTCCGTAGGCGGACTGATAAGTCAGGGGTGAAATCCAACAGCTTAACTGTTGAACTGCCCTTGATACTGTTAGTCTTGAGTTATATGGAAGTAGATAGAATGTGTAGTGTAGCGGTGAAATGCTTAGAGATTACACAGAATACCGATTGCGAAGGCAGTCTACTACGTATATACTGACGCTAATGGACGAAAGCG	Bloom	0.866188	1.17933e-73		Bacteroidetes_1139			Bacteria	Bacteroidetes	FCB group	Flavobacteriia	Flavobacteriales	Flavobacteriaceae	Lutibacter	Lutibacter profundi		Lutibacter profundi						Bloom	NA	NA	NA			Bloom	NA	NA	NA
CGTTACTCGGAATCACTGGGCGTAAAGAGCGTGTAGGCGGATAGTTAAGTTTGAAGTGAAATCCTATGGCTCAACCATAGAACTGCTTTGAAAACTGATTATCTAGAATATGGGAGAGGTAGATGGAATTTCTGGTGTAGGGGTAAAATCCGTAGAGATCAGAAGGAATACCGATTGCGAAGGCGATCTACTGGAACATTATTGACGCTGAGACGCGAAAGCG	Bloom	0.863799	8.33978e-73		Proteobacteria_4957			Bacteria	Proteobacteria		Epsilonproteobacteria	Campylobacterales	Campylobacteraceae	Poseidonibacter	Poseidonibacter lekithochrous		Poseidonibacter lekithochrous						Bloom	NA	NA	NA			Bloom	NA	NA	NA
CGTTATCCGGATTTATTGGGTTTAAAGGGTACGTAGGCGGAAGATTAAGTCAGTAGTGAAAGCCCATCGCTCAACGATGGAACTGCTATTGATACTGGTTTTCTTGAATATACTTGAAGTAGGCGGAATACGACATGTAGCGGTGAAATGCATAGATATGTCGTAGAACACCGATTGCGAAGGCAGCTTACTAAGGTATTATTGACGCTAATGTACGAAAGCG	Bloom	0.844036	2.41247e-66		Bacteroidetes_275			Bacteria	Bacteroidetes	FCB group	Bacteroidia	Marinilabiliales	Marinifilaceae	Labilibaculum	Labilibaculum antarcticum		Labilibaculum antarcticum						Bloom	NA	NA	NA			Bloom	Chl-a	0.435447	2.58444e-11
CGTTGTTCGGAATTACTGGGCGTAAAGCGTACGTAGGCGGATTAGTCAGTCAGAGGTGAAATCCCAGGGCTCAACCCTGGAACTGCCTTTGATACTGCTAGTCTTGAGTTCGAGAGAGGTGAGTGGAATTCCAAGTGTAGAGGTGAAATTCGTAGATATTTGGAGGAACACCAGTGGCGAAGGCGGCTCACTGGCTCGATACTGACGCTGAGGTACGAAAGTG	Bloom	0.82693	1.94183e-61		Proteobacteria_6064			Bacteria	Proteobacteria		Alphaproteobacteria	Rhodobacterales	Rhodobacteraceae				Rhodobacteraceae						Bloom	Other	0.490953	9.75e-10			Bloom	Fall/Winter	0.405742	6.91235e-10
CGTTATCCGGAATTACTGGGTTTAAAGGGTGCGTAGGCGGTTAAGTAAGTCAGAGGTGAAATGTTATCGCTCAACGATAAAATTGCCTTTGATACTGCTTAACTTGAATCAGAATGAGGTTGGCGGAATGTGACATGTAGCGGTGAAATGCATAGATATGTCATGGAACACCGATTGCGAAGGCAGCTGACTGGCACTTGATTGACGCTGAGGCACGAAAGCG	Bloom	0.822221	3.50509e-60		Bacteroidetes_223			Bacteria	Bacteroidetes	FCB group	Saprospiria	Saprospirales	Haliscomenobacteraceae	Haliscomenobacter	Haliscomenobacter hydrossis	Haliscomenobacter hydrossis DSM 1100	Haliscomenobacter hydrossis DSM 1100						Bloom	NA	NA	NA			Bloom	NA	NA	NA
TGTTATTCGGTCAAATTGGGCGTAAAGGGCTTGTAGGCAGAAATTTGAAGTAAAAAGTTAAATGTCAAAACTTAATTTTGGAAAAGCTTTTTAAACTATTTTTTCTTGGATAATTTAGGGGATAGTAATATTTCTTTAGTAAGGATGGCATCTTTTAATAAAAGAGAGAATACCTAGGGTGTAGACAACTATCTAGTTTTATTTATCGACGCTGAAAGGCTAAAGCA	Bloom	0.813983	4.52546e-58		Spirochaetes_45			Bacteria	Spirochaetes		Spirochaetia	Brachyspirales	Brachyspiraceae	Brachyspira			Brachyspira						Bloom	NA	NA	NA			Bloom	NA	NA	NA
CGTTGTTCGGAATTACTGGGCGTAAAGCGCGCGTAGGCGGACTGGAAAGTTGGGGGTGAAATCCCGGGGCTCAACCCCGGAACGGCCTCCAAAACTATCAGTCTAGAGTTCGAGAGAGGTGAGTGGAATTCCGAGTGTAGAGGTGAAATTCGTAGATATTCGGAGGAACACCAGTGGCGAAGGCGGCTCACTGGCTCGATACTGACGCTGAGGTGCGAAAGCG	Bloom	0.807878	1.42439e-56		Proteobacteria_5926			Bacteria	Proteobacteria		Alphaproteobacteria	Rhodobacterales	Rhodobacteraceae	Marivivens	Marivivens sp. JLT3646		Marivivens sp. JLT3646						Bloom	NA	NA	NA			Bloom	Chl-a	0.214455	0.00160154
CGTTAATCGGAATTACTGGGCGTAAAGCGCGCGTAGGCGGTTTGTTAAGTCAGATGTGAAAGCCCCGGGCTCAACCTGGGAACTGCACCTGATACTGGCAAACTAGAGTACAGAAGAGGGTGGTGGAATTTCCTGTGTAGCGGTGAAATGCGTAGATATAGGAAGGAACACCAGTGGCGAAGGCGACCACCTGGTCTGATACTGACGCTGAGGTGCGAAAGCG	Bloom	0.807834	1.45967e-56		Proteobacteria_1926			Bacteria	Proteobacteria		Gammaproteobacteria	Pseudomonadales	Pseudomonadaceae	Pseudomonas	Pseudomonas marincola		Pseudomonas marincola						Bloom	NA	NA	NA			Bloom	Fall/Winter2019	0.289126	1.73198e-05
CGTTAATCGGAATTACTGGGCGTAAAGCGCACGCAGGCGGTCTGTTAAGCTAGATGTGAAAGCCCCGCGCTCAACGTGGGAGGGTCATTTAGAACTGGCAGACTAGAGTCTTGGAGAGGGGAGTGGAATTCCAGGTGTAGCGGTGAAATGCGTAGAGATCTGGAGGAACATCAATGGCGAAGGCAACTCCCTGGCCAAAGACTGACGCTCATGTGCGAAAGTG	Bloom	0.755324	1.42749e-45		Proteobacteria_6988			Bacteria	Proteobacteria		Gammaproteobacteria	Alteromonadales	Alteromonadaceae				Alteromonadaceae						Bloom	Fall/Winter	0.422699	2.41e-07			Bloom	Fall/Winter	0.331699	6.86278e-07
CGTTAATCGGAATTACTGGGCGTAAAGCGCGCGTAGGCGGTTAAATAAGTCAGATGTGAAATCCCTGGGCTCAACCTAGGAACTGCATTTGAAACTATTTGGCTAGAGTATGGTAGAGGTGAGTGGAATTTCAGGTGTAGCGGTGAAATGCGTAGAGATCTGAAGGAACATCAGTGGCGAAGGCGACTCACTGGGCCATTACTGACGCTGAGGTGCGAAAGCG	Bloom	0.755216	1.49408e-45		Proteobacteria_2622			Bacteria	Proteobacteria		Gammaproteobacteria	Thiotrichales	Piscirickettsiaceae	Methylophaga			Methylophaga						Bloom	Chlorophyll-a	0.370337	7.79e-06			Bloom	Chl-a	0.499505	6.61738e-15
CGTTAATCGGAATTACTGGGCGTAAAGCGTACGCAGGCGGTTTGTTAAGCGAGATGTGAAAGCCCCGGGCTCAACCTGGGAACTGCATTTCGAACTGGCAAACTAGAGTGTGATAGAGGGTGGTAGAATTTCAGGTGTAGCGGTGAAATGCGTAGAGATCTGAAGGAATACCGATGGCGAAGGCAGCCACCTGGGTCAACACTGACGCTCATGTACGAAAGCG	Bloom	0.749085	1.88559e-44		Proteobacteria_7120			Bacteria	Proteobacteria		Gammaproteobacteria	Alteromonadales	Pseudoalteromonadaceae	Pseudoalteromonas	Pseudoalteromonas sp. SM9913		Pseudoalteromonas sp. SM9913						Bloom	NA	NA	NA			Bloom	Fall/Winter2019	0.234629	0.000538843
CGTTAATCGGAATTACTGGGCGTAAAGCGTACGTAGGCGGTTTGTTAAGCAAGATGTGAAAGCCCAGGGCTCAACCTTGGAACTGCATTTTGAACTGGCAAACTAGAGTACTGTAGAGGGTGGTGGAATTTCCAGTGTAGCGGTGAAATGCGTAGAGATTGGAAGGAACATCAGTGGCGAAGGCGGCCACCTGGACAGATACTGACGCTGAGGTACGAAAGCG	Bloom	0.739002	1.04371e-42		Proteobacteria_6957			Bacteria	Proteobacteria		Gammaproteobacteria	Alteromonadales	Colwelliaceae	Litorilituus	Litorilituus sediminis		Litorilituus sediminis						Bloom	NA	NA	NA			Bloom	NA	NA	NA
CGTTACTCGGAATCACTGGGCGTAAAGAGCGTGTAGGCGGGTTTGTAAGTTTGAAGTGAAATCCAATGGCTCAACCATTGAACTGCTTTGAAAACTGCTTACCTAGAATATGGGAGAGGTAGATGGAATTTCTGGTGTAGGGGTAAAATCCGTAGAGATCAGAAGGAATACCGATTGCGAAGGCGATCTACTGGAACATTATTGACGCTGAGACGCGAAAGCG	Bloom	0.733459	8.76979e-42		Proteobacteria_4957			Bacteria	Proteobacteria		Epsilonproteobacteria	Campylobacterales	Campylobacteraceae	Poseidonibacter	Poseidonibacter lekithochrous		Poseidonibacter lekithochrous						Bloom	Early-Summer	0.265526	0.00164646			Bloom	Summer	0.256119	0.000151785
CGTTAATCGGAATTACTGGGCGTAAAGCGCATGCAGGTGGTTCGTTAAGTCAGATGTGAAAGCCCGAGGCTCAACCTCGGAACTGCATTTGAAACTGGCGGACTAGAGTACTGTAGAGGGGGGTAGAATTTCAGGTGTAGCGGTGAAATGCGTAGAGATCTGAAGGAATACCAGTGGCGAAGGCGGCCCCCTGGACAGATACTGACACTCAGATGCGAAAGCG	Bloom	0.73221	1.40624e-41		Proteobacteria_1374			Bacteria	Proteobacteria		Gammaproteobacteria	Vibrionales	Vibrionaceae	Vibrio	Vibrio tapetis		Vibrio tapetis						Bloom	NA	NA	NA			Bloom	Chl-a	0.16161	0.0179872
CGTTAATCGGAATTACTGGGCGTAAAGCGCATGCAGGTGGTTCGTTAAGTCAGATGTGAAAGCCCGGGGCTCAACCTCGGAACTGCATTTGAAACTGGCGGACTAGAGTACTGTAGAGGGGGGTAGAATTTCAGGTGTAGCGGTGAAATGCGTAGAGATCTGAAGGAATACCAGTGGCGAAGGCGGCCCCCTGGACAGATACTGACACTCAGATGCGAAAGCG	Bloom	0.731264	2.00678e-41		Proteobacteria_1374			Bacteria	Proteobacteria		Gammaproteobacteria	Vibrionales	Vibrionaceae	Vibrio	Vibrio tapetis		Vibrio tapetis						Bloom	Spring	0.278328	0.000948266			Bloom	Winter/Spring	0.280261	3.18927e-05
CGTTATCCGGATTTATTGGGTTTAAAGGGTGCGTAGGCGGACTAATAAGTCAGTGGTGAAATCTTGCAGCTTAACTGTAAAACTGCCATTGATACTGTTAGTCTTGAATTTAGTTGAGGTAGGCGGAATGTGTTGTGTAGCGGTGAAATGCATAGATATAACACAGAACACCGATTGCGAAGGCAGCTTACTAAGCTATAATTGACGCTGATGCACGAAAGCG	Bloom	0.725524	1.68471e-40		Bacteroidetes_278			Bacteria	Bacteroidetes	FCB group	Bacteroidia	Marinilabiliales	Prolixibacteraceae	Draconibacterium			Draconibacterium						Bloom	Fall/Winter	0.185811	0.0291121			Bloom	Fall/Winter2019	0.142569	0.037156
CGTTAATCGGAATTACTGGGCGTAAAGCGTGCGTAGGCGGATTGTTAAGCGAGATGTGAAAGCCCCGGGCTCAACCTGGGAACTGCATTTCGAACTGGCAGTCTAGAGTTTTGTAGAGGGTGGTGGAATTTCCAGTGTAGCGGTGAAATGCGTAGAGATTGGAAGGAACATCAGTGGCGAAGGCGGCCACCTGGACAAAAACTGACGCTGAGGCACGAAAGCG	Bloom	0.721804	6.50145e-40		Proteobacteria_6975			Bacteria	Proteobacteria		Gammaproteobacteria	Alteromonadales	Colwelliaceae	Thalassotalea	Thalassotalea sp. PS06		Thalassotalea sp. PS06						Bloom	NA	NA	NA			Bloom	Chl-a	0.363076	4.55214e-08
CGTTAATCGGAATTACTGGGCGTAAAGCGCATGCAGGTGGTTCATTAAGTCAGATGTGAAAGCCCGGGGCTCAACCTCGGAACTGCATTTGAAACTGGTGAACTAGAGTACTGTAGAGGGGGGTAGAATTTCAGGTGTAGCGGTGAAATGCGTAGAGATCTGAAGGAATACCAGTGGCGAAGGCGGCCCCCTGGACAGATACTGACACTCAGATGCGAAAGCG	Bloom	0.718078	2.45875e-39		Proteobacteria_1012			Bacteria	Proteobacteria		Gammaproteobacteria	Vibrionales	Vibrionaceae	Vibrio	Vibrio cyclitrophicus		Vibrio cyclitrophicus						Bloom	Early-Summer	0.506862	2.25e-10			Bloom	NA	NA	NA
CGTTAATCGGAATTACTGGGCGTAAAGCGCGCGTAGGTGGTTAATTAAGTCAGATGTGAAAGCCCAGGGCTCAACCTTGGAACTGCATTTGAAACTGGTTAACTAGAGTTTTGTAGAGGGTGGTAGAATTTCAGGTGTAGCGGTGAAATGCGTAGAGATCTGAAGGAATACCAGTGGCGAAGGCGGCCACCTGGACAAAGACTGACACTGAGGCGCGAAGGCG	Bloom	0.717028	3.56436e-39		Proteobacteria_1413			Bacteria	Proteobacteria		Gammaproteobacteria	Alteromonadales	Psychromonadaceae	Psychromonas	Psychromonas sp. CNPT3		Psychromonas sp. CNPT3						Bloom	NA	NA	NA			Bloom	Fall/Winter	0.175555	0.0100787
CGTTACTCGGAATCACTGGGCGTAAAGAGCGTGTAGGCGGATAGTTAAGTTTGAAGTGAAATCCAATGGCTCAACCATTGAACTGCTTTGAAAACTGATTATCTAGAATATGGGAGAGGTAGATGGAATTTCTGGTGTAGGGGTAAAATCCGTAGAGATCAGAAGGAATACCGATTGCGAAGGCGATCTACTGGAACATTATTGACGCTGAGACGCGAAAGCG	Bloom	0.699952	1.18566e-36		Proteobacteria_4957			Bacteria	Proteobacteria		Epsilonproteobacteria	Campylobacterales	Campylobacteraceae	Poseidonibacter	Poseidonibacter lekithochrous		Poseidonibacter lekithochrous						Bloom	NA	NA	NA			Bloom	NA	NA	NA
CGTTATCCGGAATCACTGGGTTTAAAGGGTGCGTAGGCGGTTATGTAAGTCAGAGGTGAAATGTCGTCGCTTAACGATGAAATTGCCTTTGATACTGCTTAACTTGAATCAGAATGAGGTTGGCGGAATGTGACATGTAGCGGTGAAATGCATAGATATGTCATGGAACACCGATTGCGAAGGCAGCTGACTGGCACTTGATTGACGCTGAGGCACGAAAGCG	Bloom	0.696569	3.56854e-36		Bacteroidetes_223			Bacteria	Bacteroidetes	FCB group	Saprospiria	Saprospirales	Haliscomenobacteraceae	Haliscomenobacter	Haliscomenobacter hydrossis	Haliscomenobacter hydrossis DSM 1100	Haliscomenobacter hydrossis DSM 1100						Bloom	NA	NA	NA			Bloom	Summer	0.36213	4.96184e-08
CGTTACTCGGAATCACTGGGCGTAAAGAGCATGTAGGCTGGTTTGTAAGTTGGAAGTGAAATCCTATGGCTTAACCATAGAACTGCTTCCAAAACTGCAGACCTAGAATATGGGAGAGGTAGATGGAATTTCTGGTGTAGGGGTAAAATCCGTAGAGATCAGAAGGAATACCGATTGCGAAGGCGATCTACTGGAACATTATTGACGCTGAGATGCGAAAGCG	Bloom	0.669833	1.29547e-32		Proteobacteria_4909			Bacteria	Proteobacteria		Epsilonproteobacteria	Campylobacterales	Campylobacteraceae	Arcobacter	Arcobacter nitrofigilis	Arcobacter nitrofigilis DSM 7299	Arcobacter nitrofigilis DSM 7299						Bloom	Fall/Winter	0.306786	0.000252419			Bloom	Fall/Winter2019	0.326255	1.06676e-06
CGTTATCCGGAATCATTGGGTTTAAAGGGTCCGCAGGCGGATTTATAAGTCAGTGGTGAAAGCCTACAGCTTAACTGTAGAACTGCCATTGATACTGTAAGTCTTGAATTCGGTCGAAGTGGGCGGAATATGTCATGTAGCGGTGAAATGCTTAGATATGACATAGAACACCGATAGCGAAGGCAGCTCACTAGGCCTGGATTGACGCTCAGGGACGAAAGCG	Bloom	0.626398	1.46648e-27		Bacteroidetes_1149			Bacteria	Bacteroidetes	FCB group	Flavobacteriia	Flavobacteriales	Crocinitomicaceae	Fluviicola	Fluviicola taffensis	Fluviicola taffensis DSM 16823	Fluviicola taffensis DSM 16823						Bloom	NA	NA	NA			Bloom	NA	NA	NA
CGTTATCCGGAATTATTGGGTTTAAAGGGTCCGTAGGCGGATGATTAAGTCAGGGGTGAAAGTTTGCAGCTCAACTGTAAAATTGCCTTTGATACTGGTTATCTTGAGTTGTATTGAAGTAGGCGGAATATGTAGTGTAGCGGTGAAATGCATAGATATTACATAGAACACCAATTGCGAAGGCAGCTTACTAAGTACTAACTGACGCTGATGGACGAAAGCG	Bloom	0.61737	1.31441e-26		Bacteroidetes_921			Bacteria	Bacteroidetes	FCB group	Flavobacteriia	Flavobacteriales	Flavobacteriaceae	Euzebyella	Euzebyella marina		Euzebyella marina						Bloom	Fall/Winter	0.370371	7.77e-06			Bloom	Fall/Winter	0.344581	2.33491e-07
CGTTATTCGGAATTATTGGGCGTAAAGCGCCTGTAGGTTGTTTAATAAGTTCGTTGTTAAATCCCAGGACCCAACTCTGGATAGGCATCGGATACTACTAAACTAGAGTATGATAGGGGTAGAGGGAATTTCTAGTGTAGCGGTGAAATGCGTTGATATTAGGAAGAACACCGGAGGCGAAGGCGCTCTACTGGGTCATTACTGACACTCAGAGGCGAAAGCC	Bloom	0.614092	2.86434e-26		Cyanobacteria_160			Bacteria	Cyanobacteria	Cyanobacteria/Melainabacteria group													Bloom	NA	NA	NA			Bloom	Chl-a	0.208277	0.0021939
CGTTGTTCGGAATTACTGGGCGTAAAGCGCACGTAGGCGGATTGGAAAGTTGGGGGTGAAATCCCAGGGCTCAACCCTGGAACTGCCCTCAAAACTATCAGTCTAGAGTTCGAGAGAGGTGAGTGGAATTGCGAGTGTAGAGGTGAAATTCGTAGATATTCGCAGGAACACCAGTGGCGAAGGCGGCTCACTGGCTCGATACTGACGCTGAGGTGCGAAAGTG	Bloom	0.61033	6.92601e-26		Proteobacteria_5941			Bacteria	Proteobacteria		Alphaproteobacteria	Rhodobacterales	Rhodobacteraceae	Roseivivax	Roseivivax sp. THAF30		Roseivivax sp. THAF30						Bloom	NA	NA	NA			Bloom	NA	NA	NA
CGTTGTCCGGAATTATTGGGCGTAAAGAGCTCGTAGGCGGTTTGTCACGTCTGCTGTGAAATTTCGAGGCTCAACCTCGAACTTGCAGTGGGTACGGGCAGGCTAGAGTGCGGTAGGGGAGATGGGAATTCCTGGTGTAGCGGTGGAATGCGCAGATATCAGGAGGAACACCAATGGCGAAGGCACATCTCTGGGCCGTAACTGACGCTGAGGAGCGAAAGCA	Bloom	0.603588	3.27245e-25		Actinobacteria_1933			Bacteria	Actinobacteria	Terrabacteria group	Actinobacteria	Micrococcales	Microbacteriaceae	Candidatus Aquiluna	Candidatus Aquiluna sp. 15G-AUS-rot		Candidatus Aquiluna sp. 15G-AUS-rot						Bloom	Winter/Spring	0.268157	0.00147312			Bloom	NA	NA	NA
CGTTAATCGGAATTACTGGGCGTAAAGGGTTCGTAGGCGGTTTATTAAGTCAGATGTGAAAGCCCAGGGCTCAACCTTGGAACTGCATTTGATACTGGTAGACTAGAGTATAGTAGAGGAGTGGGGAATTTCTGGTGTAGCGGTGAAATGCGTAGAGATCAGAAGGAACACCAATGGCGAAGGCAACACTCTGGACTAATACTGACGCTGAGGGACGAAAGCG	Bloom	0.57429	1.8539e-22		Proteobacteria_6632			Bacteria	Proteobacteria		Gammaproteobacteria	Thiotrichales	Francisellaceae	Francisella	Francisella uliginis		Francisella uliginis						Bloom	Winter/Spring	0.232667	0.00602982			Bloom	Winter/Spring	0.309092	4.05591e-06
CGTTATCCGGAATCATTGGGTTTAAAGGGTCCGTAGGCGGGATGATAAGTCAGTGGTGAAATCCTACAGCTTAACTGTAGAACTGCCATTGATACTGTCGTTCTTGAATTTGGTCGAAGTGGGCGGAATAAGTAGTGTAGCGGTGAAATGCATAGATATTACTTAGAACACCGATAGTGAAGACAGCTCACTAGGCCTGAATTGACGCTGAGGGACGAAAGCG	Bloom	0.556026	7.07434e-21		Bacteroidetes_1149			Bacteria	Bacteroidetes	FCB group	Flavobacteriia	Flavobacteriales	Crocinitomicaceae	Fluviicola	Fluviicola taffensis	Fluviicola taffensis DSM 16823	Fluviicola taffensis DSM 16823						Bloom	NA	NA	NA			Bloom	Winter/Spring	0.350971	1.34287e-07
CGTTATCCGGAATCATTGGGTTTAAAGGGTCCGTAGGCGGACAATTAAGTCAGAGGTGAAATTCTACGGCTCAACCGTAGAACTGCCTTTGAAACTGGTTGTCTTGAATCGTTGTGAAGTGGTTAGAATGAGCAGTGTAGCGGTGAAATGCTTAGAGATTGCTCAGAATACCGATTGCGAAGGCAGATCACTAACAACGTATTGACGCTGAGGGACGAAAGCG	Bloom	0.517505	7.66617e-18		Bacteroidetes_1039			Bacteria	Bacteroidetes	FCB group	Flavobacteriia	Flavobacteriales	Flavobacteriaceae				Flavobacteriaceae						Bloom	Chlorophyll-a	0.200203	0.0185553			Bloom	Chl-a	0.196221	0.00395511
CGTTATCCGGATTCATTGGGTTTAAAGGGTCCGTAGGCGGGTCTTTAAGTCAGTGGTGAAAGCCGACAGCTCAACTGTCGAACTGCCATTGATACTGGAGACCTTGAGTACAAATGAAGTAGGCGGAATGAGTCATGTAGCGGTGAAATGCATAGATATGACTCAGAACACCGATTGCGAAGGCAGCTTACTAACATGTAACTGACGCTGAGGGACGAAAGCG	Bloom	0.515947	9.98627e-18		Bacteroidetes_1149			Bacteria	Bacteroidetes	FCB group	Flavobacteriia	Flavobacteriales	Crocinitomicaceae	Fluviicola	Fluviicola taffensis	Fluviicola taffensis DSM 16823	Fluviicola taffensis DSM 16823						Bloom	Winter/Spring	0.673674	1.38e-19			Bloom	Winter/Spring	0.633545	2.04926e-25
CGTTAATCGGAATTACTGGGCGTAAAGGGTTCGTAGGTGGTTAGATAAGTCAGATGTGAAAGCCCTGGGCTCAACCTGGGAACTGCATTTGATACTGTTTAACTAGAGTTTACTAGAGGATTGGGGAATTTCCGGTGTAGCGGTGAAATGCGTAGAGATCGGAAGGAACATCAATGGCGAAGGCAACAATCTGGGGTTAAACTGACACTGAGGGACGAAAGCG	Bloom	0.494214	3.47561e-16		Proteobacteria_6693			Bacteria	Proteobacteria		Gammaproteobacteria	Thiotrichales	Francisellaceae	Allofrancisella	Allofrancisella guangzhouensis		Allofrancisella guangzhouensis						Bloom	NA	NA	NA			Bloom	Summer	0.226884	0.000827898
CGTTATCCGGAATTATTGGGTTTAAAGGGTCCGCAGGCGGAATTATAAGTCAGTGGTGAAATCTCGATGCTCAACATCGAAACTGCCATTGATACTGTAGTTCTTGAATATAGTCGGAGTAGGCGGAATGTGTAGTGTAGCGGTGAAATGCTTAGATATTACACAGAACACCGATAGCGAAGGCAGCTTACTAGGTTATAATTGACGCTCATGGACGAAAGCG	Bloom	0.484524	1.56271e-15		Bacteroidetes_1149			Bacteria	Bacteroidetes	FCB group	Flavobacteriia	Flavobacteriales	Crocinitomicaceae	Fluviicola	Fluviicola taffensis	Fluviicola taffensis DSM 16823	Fluviicola taffensis DSM 16823						Bloom	NA	NA	NA			Bloom	NA	NA	NA
CGTTAATCGGAATTACTGGGCGTAAAGCGCATGCAGGTGGTTCATTAAGTCAGATGTGAAAGCCCGGGGCTCAACCTCGGAACTGCATTTGAAACTGGTGAACTAGAGTGCTGTAGAGGGGGGTAGAATTTCAGGTGTAGCGGTGAAATGCGTAGAGATCTGAAGGAATACCAGTGGCGAAGGCGGCCCCCTGGACAGACACTGACACTCAGATGCGAAAGCG	Bloom	0.464365	3.07374e-14		Proteobacteria_1006			Bacteria	Proteobacteria		Gammaproteobacteria	Vibrionales	Vibrionaceae	Vibrio	Vibrio splendidus		Vibrio splendidus						Bloom	Winter/Spring	0.387719	2.62e-06			Bloom	Fall/Winter	0.214891	0.00156584
CGTTATCCGGAATCATTGGGTTTAAAGGGTCCGCAGGCGGTCAATTAAGTCAGAGGTGAAATCCCATAGCTTAACTATGGAACTGCCTTTGATACTGGTTGACTTGAGTCATATGGAAGTAGATAGAATGTGTAGTGTAGCGGTGAAATGCATAGATATTACACAGAATACCGATTGCGAAGGCAGTCTACTACGTATGTACTGACGCTCATGGACGAAAGCG	Bloom	0.452701	1.57879e-13		Bacteroidetes_1126			Bacteria	Bacteroidetes	FCB group	Flavobacteriia	Flavobacteriales	Flavobacteriaceae	Polaribacter	Polaribacter sp. L12M9		Polaribacter sp. L12M9						Bloom	Fall/Winter	0.403913	8.98e-07			Bloom	Fall/Winter	0.320082	1.7411e-06
CGTTATCCGGATTTATTGGGTTTAAAGGGTCCGTAGGCGGAACTTTAAGTCAGTGGTGAAAGCCTACAGCTCAACTGTAGAACTGCCATTGATACTGAAGTTCTTGAATATATATGAAGTGGGCGGAATGCGTCATGTAGCGGTGAAATGCACAGATATGACGCAGAACACCAATTGCGAAGGCAGCTCACTAATGTATTATTGACGCTGAGGGACGAAAGCA	Bloom	0.433548	2.03288e-12		Bacteroidetes_518			Bacteria	Bacteroidetes	FCB group	Flavobacteriia	Flavobacteriales	Schleiferiaceae	Owenweeksia	Owenweeksia hongkongensis	Owenweeksia hongkongensis DSM 17368	Owenweeksia hongkongensis DSM 17368						Bloom	Early-Summer	0.173652	0.0416606			Bloom	NA	NA	NA
CGTTATCCGGATTTATTGGGTTTAAAGGGTCCGTAGGCGGATTTTTAAGTCAGTGGTGAAAGCCTACAGCTCAACTGTAGAACTGCCATTGATACTGAAGATCTTGAATATATATGAAGTGGGCGGAATGCGTCATGTAGCGGTGAAATGCACAGATATGACGCAGAACACCAATTGCGAAGGCAGCTCACTAATGTATTATTGACGCTGAGGGACGAAAGCA	Bloom	0.418464	1.36264e-11		Bacteroidetes_518			Bacteria	Bacteroidetes	FCB group	Flavobacteriia	Flavobacteriales	Schleiferiaceae	Owenweeksia	Owenweeksia hongkongensis	Owenweeksia hongkongensis DSM 17368	Owenweeksia hongkongensis DSM 17368						Bloom	Chlorophyll-a	0.20016	0.0185811			Bloom	Winter/Spring	0.235288	0.000519191
TGTTGTTCGGATTCACTGGGCGTAAAGGGTGTGTAGGCTGTATGATAAGTAAGGCGTTAAATTCTCGAGCTCAACTCGAGGTCGCGCTTTATACTGTCATACTAGAGTTTAGGTGAAGGGGTAAGAATTTCTAGAGTAGCGGTGACATGCGTAGATCCTAGAAGGAATACCAAAGGCGAAGGCAAGCCCCTAGTCTAATACTGACGCTGAGGCACGAAAGCG	Bloom	0.414239	2.2833e-11		Spirochaetes_29			Bacteria	Spirochaetes		Spirochaetia	Leptospirales	Leptospiraceae	Leptospira	Leptospira biflexa		Leptospira biflexa						Bloom	NA	NA	NA			Bloom	Summer	0.226409	0.000849602
CGTTGTTCGGAATTACTGGGCGTAAAGCGCGCGTAGGCGGCTTTTTAAGTCAGATGTGAAAGTCCACGGCTCAACCGTGGAAGTGCATTTGAAACTGGGGAGCTTGAGTACTGGAGGGGATGGTGGAATTCCCGGTGTAGAGGTGAAATTCGTAGATATCGGGAGGAATACCGGTGGCGAAGGCGACCATCTGGCCAGATACTGACGCTGAGGTGCGAAAGCG	Bloom	0.413422	2.52081e-11		Proteobacteria_4256			Bacteria	Proteobacteria		Deltaproteobacteria	Desulfobacterales	Desulfobulbaceae	Desulfotalea	Desulfotalea psychrophila	Desulfotalea psychrophila LSv54	Desulfotalea psychrophila LSv54						Bloom	Spring	0.315179	0.00016637			Bloom	Winter/Spring	0.221655	0.00109755
CGTTATCCGGATTTATTGGGTTTAAAGGGTTCGTAGGCGGGGTATTAAGTCAGTGGTGAAAGCCCACAGCTCAACTGTGGAACTGCCATTGATACTGGTACTCTTGAGTATAGTAGAAGTTAGCGGAATGTGTCATGTAGCGGTGAAATGCTTAGATATGACCCAGAACACCGATTGCGAAAGCAGCTAACTATGTTATTACTGACGCTGAGGAACGAAAGCG	Bloom	0.407029	5.41939e-11		Bacteroidetes_518			Bacteria	Bacteroidetes	FCB group	Flavobacteriia	Flavobacteriales	Schleiferiaceae	Owenweeksia	Owenweeksia hongkongensis	Owenweeksia hongkongensis DSM 17368	Owenweeksia hongkongensis DSM 17368						Bloom	Early-Summer	0.2386	0.00482882			Bloom	Chl-a	0.245871	0.00028165
CGTTATTCCAAATGATTAGGCGTAAAGGGTCCGTAGGTTGTTTATTAAGTTGAAAATTAGAATAAAAGCTCCACTTTTACACCTTTTTCAAAACTGATAAACTAGAGTATACATAGAGGATGGTGGAATTTCTATTGGAGGGTTGAAATATAATGATAATAGAAGGAAGGACAACGGCGAAGGCAACCATCTGGGTATATACTGACACTGAGGGACGAAAGCT	Bloom	0.40592	6.17854e-11		Proteobacteria_7925			Bacteria	Proteobacteria		Gammaproteobacteria			Candidatus Nardonella	Candidatus Nardonella dryophthoridicola		Candidatus Nardonella dryophthoridicola						Bloom	NA	NA	NA			Bloom	NA	NA	NA
TCTTATTCGGAATGACTGGGCGTAAAGGGTCTGTAGGCGGTTTATTAAGTGAAACGCAAAAGTTTAGGGCTCAACCCTAAAAAGATGTTTCAAACTGATAAACTAGAGTTCAAAAGGGGATAGTAGAATTTCTGGTGGAGGGATAAAATCCTTAGATATCAGAAGGAATACCAGAGGCGAAGGCGACTATCTGGGTTGATACTGACGCTGAGAGACGAAAGCA	Bloom	0.391073	3.41439e-10		Proteobacteria_6887			Bacteria	Proteobacteria		Gammaproteobacteria	Oceanospirillales	Halomonadaceae	Candidatus Carsonella	Candidatus Carsonella ruddii		Candidatus Carsonella ruddii						Bloom	Winter/Spring	0.222215	0.00880507			Bloom	Fall/Winter	0.37569	1.40434e-08
CGTTATCCGGATTTATTGGGTTTAAAGGGTACGTAGGCGGAGTTTTAAGTCAGTAGTGAAAGCCCATCGCTTAACGATGGAACTGCTATTGATACTGATACTCTTGAATATAGTTGAAGTGGGCGGAATACGGCATGTAGCGGTGAAATGCATAGATATGCCGTGGAACACCAATCGCGAAGGCAGCTCACTAAGCTATTATTGACGCTAATGTACGAAAGCG	Bloom	0.369266	3.62105e-09		Bacteroidetes_275			Bacteria	Bacteroidetes	FCB group	Bacteroidia	Marinilabiliales	Marinifilaceae	Labilibaculum	Labilibaculum antarcticum		Labilibaculum antarcticum						Bloom	Spring	0.416252	3.82e-07			Bloom	Winter/Spring	0.165127	0.0156027
TGTTATCCGGAATTATTGGGCGTAAAGCGTCTGCAGGTTGATCTATAAGTCTTTTGTCAAATCTTTGGGCTTAACCCAAAAACAGCAAAAGAAACTATTTATCTTGAGTATGGTAGAGGTAAGGGGAATTTCCAGTGGAGCGGTGAAATGCGTAGATATTGGAAAGAACACCAACAGCGAAGGCACCTTACTGGGCCATTACTGACACTCAGAGACGAAAGCT	Bloom	0.352534	1.97481e-08		Cyanobacteria_209			Bacteria	Cyanobacteria	Cyanobacteria/Melainabacteria group		Synechococcales	Prochlorotrichaceae	Halomicronema	Halomicronema hongdechloris	Halomicronema hongdechloris C2206	Halomicronema hongdechloris C2206						Bloom	Winter/Spring	0.357196	1.7e-05			Bloom	Winter/Spring	0.210667	0.0019444
CGTTAATCGGAATTACTGGGCGTAAAGAGTTCGTAGGTCGTTCAAAAAGTCAGTTGTGAAATCCCTGAGCTCAACTCAGGAACTGCAACTGATACTCTTGGACTAGAGTTTAGCAGAGGATTAGGAAATTTCCAGTGTAGCGGTGAAATGCGTAGATATTGGAAGGAATATCAATGGCGAAGGCAATAATCTGGGTTAAAACTGACACTGAGGAACGAAAGCG	Bloom	0.342157	5.38741e-08		Proteobacteria_6696			Bacteria	Proteobacteria		Gammaproteobacteria	Thiotrichales	Francisellaceae				Francisellaceae						Bloom	NA	NA	NA			Bloom	Fall/Winter2019	0.164728	0.0158588
CGTTGTTCGGATTTACTGGGCGTAAAGCGCGCGCAGGCGGATTAACAAGTCAGATGTGAAATCCCGGGGCTCAACCTCGGAACTGCGTCTGAAACTGTTAGTCTAGAATATCAGAGGGGGTAGGGGAATTTCACGTGTAGGGGTAAAATCCGTAGAGATGTGAAGGAACACCGGTGGCGAAGGCGCCTACCTGGATGATTATTGACGCTGAGGCGCGAAAGCG	Bloom	0.326555	2.2776e-07		Proteobacteria_4404			Bacteria	Proteobacteria		Oligoflexia	Bacteriovoracales					Bacteriovoracales						Bloom	Chlorophyll-a	0.273024	0.00119563			Bloom	Chl-a	0.558553	5.92186e-19
CGTTATCCGGAATCATTGGGTTTAAAGGGTTCGCAGGCGGTTTATTAAGTCAGTGGTGAAAGCCTACAGCTCAACTGTAGAACTGCCATTGATACTGATAGACTTGAATTTAGTTGAAGTAGGCGGAATGTGTAGTGTAGCGGTGAAATGCTTAGATATTACACAGAACACCGATAGCGAAGGCAGCTTACTAAACTACGATTGACGCTCATGAACGAAAGCG	Bloom	0.324112	2.83384e-07		Bacteroidetes_1149			Bacteria	Bacteroidetes	FCB group	Flavobacteriia	Flavobacteriales	Crocinitomicaceae	Fluviicola	Fluviicola taffensis	Fluviicola taffensis DSM 16823	Fluviicola taffensis DSM 16823						Bloom	Chlorophyll-a	0.55347	1.92e-12			Bloom	Chl-a	0.700438	6.88411e-33
CGTTATCCGGAATCATTGGGTTTAAAGGGTCCGCAGGCGGTCAATTAAGTCAGAGGTGAAATCCCATAGCTTAACTATGGAACTGCCTTTGATACTGGTTGACTTGAGTTATACGGAAGTAGATAGAATAAGTAGTGTAGCGGTGAAATGCATAGATATTACTTAGAATACCGATTGCGAAGGCAGTCTACTACGTATATACTGACGCTCATGGACGAAAGCG	Bloom	0.322665	3.22278e-07		Bacteroidetes_1117			Bacteria	Bacteroidetes	FCB group	Flavobacteriia	Flavobacteriales	Flavobacteriaceae	Tenacibaculum	Tenacibaculum mesophilum		Tenacibaculum mesophilum						Bloom	NA	NA	NA			Bloom	Winter/Spring	0.386854	4.75231e-09
CGTTATCCGGAATCATTGGGTTTAAAGGGTCCGTAGGCGGGCTATTAAGTCAGGGGTGAAAGTTTGCAGCTCAACTGTAAAATTGCCTTTGATACTGGTAGTCTTGAATTGTAGTGAAGTGGTTAGAATATGTGGTGTAGCGGTGAAATGCATAGATATCACATAGAATACCGATTGCGAAGGCAGATCACTAACTATATATTGACGCTGAGGGACGAAAGCG	Bloom	0.311536	8.47142e-07		Bacteroidetes_955			Bacteria	Bacteroidetes	FCB group	Flavobacteriia	Flavobacteriales	Flavobacteriaceae	Cellulophaga	Cellulophaga lytica		Cellulophaga lytica						Bloom	Late-Summer	0.383687	3.39e-06			Bloom	Summer	0.205397	0.00253311
CGTTGTCCGGATTTACTGGGTTTAAAGGATGCGTAGGCGGACACTTAAGCCAGTGGTGAAATCCCATAGCTCAACTATGGAACTGCCATTGGAACTGTGTGTCTTGAATTCGGTTGAGGTAGATGGAATATAACATGTAGCGGTGAAATGCTTAGATATGTTATAGAACACCGATTGCGAAGGCAGTCTACTAAGCCGACATTGACGCTGAGGCATGAAAGCG	Bloom	0.306628	1.28143e-06		Bacteroidetes_272			Bacteria	Bacteroidetes	FCB group	Chitinophagia	Chitinophagales	Chitinophagaceae				Chitinophagaceae						Bloom	Early-Summer	0.172596	0.0429374			Bloom	Summer	0.178128	0.00901609
CGTTAATCGGAATTACTGGGCGTAAAGCGTGCGTAGGCGGTTTGTTAAGCAAGATGTGAAAGCCCCGGGCTCAACCTGGGAACTGCATTTTGAACTGGCAGGCTAGAGTACTGTAGAGGGTGGTGGAATTTCCAGTGTAGCGGTGAAATGCGTAGAGATTGGAAGGAACATCAGTGGCGAAGGCGGCCACCTGGACAGATACTGACGCTGAGGCACGAAAGCG	Bloom	0.302194	1.85049e-06		Proteobacteria_6973			Bacteria	Proteobacteria		Gammaproteobacteria	Alteromonadales	Colwelliaceae				Colwelliaceae						Bloom	NA	NA	NA			Bloom	NA	NA	NA
CGTTATCCGGAATCATTGGGTTTAAAGGGTGCGTAGGCGGAATAATAAGTCAGAGGTGAAATCCTGCAGCTCAACTGTAGAACTGCCTTTGATACTGTTATTCTTGAATCTAGTTGAAGTAGGCGGAATGTAACATGTAGCGGTGAAATGCATAGAGATGTTACAGAACACCGATTGCGAAGGCAGCTTACTAAACTAGCATTGACGCTGATGCACGAAAGCG	Bloom	0.282956	8.50894e-06		Bacteroidetes_273			Bacteria	Bacteroidetes	FCB group							FCB group						Bloom	Chlorophyll-a	0.607288	2.87e-15			Bloom	Chl-a	0.769539	3.62436e-43
CGTTATTCGGAATTATTGGGCGTTAAGGGTTCGTAGGTTGTTTTGTAGGTTAACTTTTAAATATTAAGACTATAACCTTAATTTAAAGTTAAAACCACATTACTTTTTGAGTTTTTTAAAAGAAAGTAGTATTTTTGAGGGACAGATAAAATTGGTTGATCTCAAGAAGAATTTTAATAGCGAAGGCAGCTTTCTATAACAAACTGACGCTGAGGAACGAAAGTT	Bloom	0.263751	3.5006e-05		Proteobacteria_6887			Bacteria	Proteobacteria		Gammaproteobacteria	Oceanospirillales	Halomonadaceae	Candidatus Carsonella	Candidatus Carsonella ruddii		Candidatus Carsonella ruddii						Bloom	NA	NA	NA			Bloom	NA	NA	NA
CGTTACCCGGAATCACTGGGTGTAAAGGGTTCGTAGGCGGTGGAATAAGTTGGATATGAAAGACCGGAGCTCAACTCCGTGTTGGTGTTCAAAACTGTTTCACTAGAATTAGGGAGAGGTAAGCGGAATTCTAAGTGTAGGGGTGCAATCCGTAGATACTTAGAGGAACACCGAAAGCGAAGGCAGCTTACTGGAACTATATTGACGCTGAGGAACGAAAGCG	Bloom	0.260132	4.51594e-05		Firmicutes_Tenericutes_3396			Bacteria	Firmicutes	Terrabacteria group	Clostridia	Clostridiales	Vallitaleaceae	Petrocella	Petrocella atlantisensis		Petrocella atlantisensis						Bloom	Chlorophyll-a	0.235078	0.00551284			Bloom	Chl-a	0.295162	1.12944e-05
CGTTAATCGGAATTACTGGGCGTAAAGCGCACGCAGGCGGTCTGTTAAGCTAGATGTGAAAGCCCCGCGCTCAACGTGGGAGGGTCATTTAGAACTGGCAGACTAGAGTCTTGGAGAGGGGAGTGGAATTCCAGGTGTAGCGGTGAAATGCGTAGATATCTGGAGGAACATCAGTGGCGAAGGCGACTCCCTGGCCAAAGACTGACGCTCATGTGCGAAAGTG	Bloom	0.246994	0.000110405		Proteobacteria_7069			Bacteria	Proteobacteria		Gammaproteobacteria	Alteromonadales	Alteromonadaceae	Glaciecola	Glaciecola nitratireducens	Glaciecola nitratireducens FR1064	Glaciecola nitratireducens FR1064						Bloom	Fall/Winter	0.222905	0.00859207			Bloom	Summer	0.134912	0.0487173
CGTTAATCGGAATTACTGGGCGTAAAGCGCGCGTAGGCGGTTGTCTAAGCTAGATGTGAAAGCCCTGGGCTCAACCTGGGAACTGCATTTAGAACTGGGCAGCTAGAGTACAGCAGAGGAGTGTGGAATTTCAGGTGTAGCGGTGAAATGCGTAGAGATCTGAAGGAACATCAGTGGCGAAGGCGACACTCTGGGCTGATACTGACGCTGAGGTGCGAAAGCG	Bloom	0.245394	0.000122698		Proteobacteria_1572			Bacteria	Proteobacteria		Gammaproteobacteria	Cellvibrionales	Cellvibrionaceae	Agarilytica	Agarilytica rhodophyticola		Agarilytica rhodophyticola						Bloom	NA	NA	NA			Bloom	Winter/Spring	0.177273	0.00935752
CGTTATCCGGAATGATTGGGCGTAAAGAGTTCGTAGGCGGTATTTGTTGTTACATGTTAAATCCTAGGTTTATACTTAGGTCTGCGTGTAATACTCTTTTACTTGAGTATAGTAGAGGATAACAGAATTTCATACATAGGGGTAAAATCCAATTATTTATGAAGGAATGCCAGTGGCGAAAGCGGTTATCTGGACTATTTACTGACGCTGAGGAACGAAAGCA	Bloom	0.23463	0.000245206		Firmicutes_Tenericutes_884			Bacteria	Tenericutes	Terrabacteria group	Mollicutes	Mycoplasmatales	Mycoplasmataceae				Mycoplasmataceae						Bloom	NA	NA	NA			Bloom	NA	NA	NA
CGTTAATCGGAATTACTGGGCGTAAAGCGCGCGTAGGCGGTTTGTTAAGTGTGATGTGAAAGCCCAGGGCTCAACCTTGGAACTGCATCACATACTGGCAAGCTAGAGTACGGTAGAGGGGGGTAGAATTCCATGTGTAGCGGTGAAATGCGTAGAGATGTGGAGGAATACCAGTGGCGAAGGCGGCCCCCTGGATCGATACTGACGCTGAGGTGCGAAAGCG	Bloom	0.231122	0.000305205		Proteobacteria_6782			Bacteria	Proteobacteria		Gammaproteobacteria			Pseudohongiella	Pseudohongiella spirulinae		Pseudohongiella spirulinae						Bloom	NA	NA	NA			Bloom	Summer	0.239324	0.000412468
CGTTATCCGGAATCATTGGGTTTAAAGGGTCCGCAGGCGGGCTTATAAGTCAGTGGTGAAATCTCACAGCTCAACTGTGAAACTGCCATTGAAACTGTAAGTCTTGAATTCGGTCGAAGTGGGCGGAATATGACATGTAGCGGTGAAATGCTTAGATATGTCCTAGAACACCAATAGCGAAGGCAGCTCACTAGGCCTGGATTGACGCTCAGGGACGAAAGCG	Bloom	0.222867	0.000504278		Bacteroidetes_1149			Bacteria	Bacteroidetes	FCB group	Flavobacteriia	Flavobacteriales	Crocinitomicaceae	Fluviicola	Fluviicola taffensis	Fluviicola taffensis DSM 16823	Fluviicola taffensis DSM 16823						Bloom	Chlorophyll-a	0.65033	6.03e-18			Bloom	Chl-a	0.700993	5.84943e-33
GAATGACTATAAATTGGGTTTAAAACGTGGGAAGACGGTTTGGGAATTACCTCATAAATCCCTTGTAAAGCAAGGACCTTGAGATAATAACCCCTTTCTAGAATGTAGATGAATTTAAGATTATTGCTGAAGTAGCGGTCAAATGCAACGATATCAGTAGGAATACCAAGGAGAAGTCACTTAAAGGATATACAATTGACGTTAAACCACGAAAGCC	Bloom	0.217286	0.000700987		Proteobacteria_3590			Bacteria	Proteobacteria		Betaproteobacteria			Candidatus Nasuia	Candidatus Nasuia deltocephalinicola		Candidatus Nasuia deltocephalinicola						Bloom	Other	0.293238	0.000482146			Bloom	NA	NA	NA
CGTTATCCGGATTTATTGGGTTTAAAGGGTTCGTAGGCGGGATATTAAGTCAGTGGTGAAAGCCCACAGCTCAACTGTGGAACTGCCATTGATACTGATATTCTTGAGTTTATTTGGAGTTAGCGGAATATGTCATGTAGCGGTGAAATGCTTAGATATGACATAGAACACCGATCGCGAAAGCAGCTAACTAAGATAATACTGACGCTGAGGAACGAAAGCG	Bloom	0.200618	0.00178685		Bacteroidetes_518			Bacteria	Bacteroidetes	FCB group	Flavobacteriia	Flavobacteriales	Schleiferiaceae	Owenweeksia	Owenweeksia hongkongensis	Owenweeksia hongkongensis DSM 17368	Owenweeksia hongkongensis DSM 17368						Bloom	Chlorophyll-a	0.345873	3.25e-05			Bloom	Chl-a	0.61579	9.96866e-24
CGTTAATCGGAATTACTGGGCGTAAAGCGCGCGTAGGTGGTTTCGTCAGTCAGATGTGAAAGCCCAGGGCTCAACCTTGGAATTGCACCTGATACTGCGGGACTAGAGTACGATAGAGGGGAGTGGAATTTCCGGTGTAGCGGTGAAATGCGTAGATATCGGAAGGAACACCAGTGGCGAAGGCGACTCCCTGGATTGATACTGACACTGAGGTGCGAAAGCG	Bloom	0.194687	0.0024506		Proteobacteria_6944			Bacteria	Proteobacteria		Gammaproteobacteria	Oceanospirillales	Oceanospirillaceae	Marinobacterium	Marinobacterium sp. LSUCC0821		Marinobacterium sp. LSUCC0821						Bloom	Fall/Winter	0.176881	0.0379521			Bloom	NA	NA	NA
GCGTTACTGGCCGTTACTAGGCGTAAAGTGTGGCTAGACGGTTTAAAGACTTTTAGAGTAAACAGAAGGGTTAAACAACATGATCTAAAAAATTTTAATACTATATGAGAATATAAGAAGAAGGCATTATGTATAACCTAGAGATAAAATACTGAGAGGTTATAAAGATTCTCAAAGGCCACGGCAGCTTTCTATTATTTTTCTGACGTTGAACCACTAAAGTA	Bloom	0.194503	0.00247441		Proteobacteria_3590			Bacteria	Proteobacteria		Betaproteobacteria			Candidatus Nasuia	Candidatus Nasuia deltocephalinicola		Candidatus Nasuia deltocephalinicola						Bloom	Winter/Spring	0.204129	0.0163276			Bloom	Winter/Spring	0.176866	0.00952416
CGTTATCCGGAATCATTGGGTTTAAAGGGTCCGTAGGCGGGCTATTAAGTCAGAGGTGAAAGTTTGCAGCTCAACTGTAAAATTGCCTTTGAAACTGGTGGTCTTGAATTATTATGAAGTGGTTAGAATAAGTAGTGTAGCGGTGAAATGCATAGATATTACTTAGAATACCAATTGCGAAGGCAGATCACTAATAATATATTGACGCTGAGGGACGAAAGCG	Bloom	0.16469	0.0106029		Bacteroidetes_1039			Bacteria	Bacteroidetes	FCB group	Flavobacteriia	Flavobacteriales	Flavobacteriaceae				Flavobacteriaceae						Bloom	Winter/Spring	0.500426	4.11e-10			Bloom	Winter/Spring	0.54625	4.81296e-18
CGTTGTTCGGAATTACTGGGCGTAAAGCGCGCGTAGGCGGACATTTAAGTCAGAGGTGAAATCCCAGGGCTCAACCCTGGAACTGCCTTTGATACTGGGTGTCTTGAGTTCGAGAGAGGTGAGTGGAATTCCGAGTGTAGAGGTGAAATTCGTAGATATTCGGAGGAACACCAGTGGCGAAGGCGGCTCACTGGCTCGATACTGACGCTGAGGTGCGAAAGTG	Post-Bloom	0.890214	3.11199e-83		Proteobacteria_6079			Bacteria	Proteobacteria		Alphaproteobacteria	Rhodobacterales	Rhodobacteraceae	Oceanicola	Oceanicola sp. D3		Oceanicola sp. D3						Post-Bloom	NA	NA	NA			Post-Bloom	NA	NA	NA
CGTTATTCAAAATAACTGGGCGTAAAGGGTTCGTAGACTGTAATATAAGTTGATAGTTAAAGTTTAATACTCAATATTAAAAAAATTATCGATACTATTTTACTTGAGTTTATTAAAGAAAAGTTGAATTTTATGATGAGAAGTAACTTTTGCAGAATCATAAAGGAATACCTGTAGCGAAGGCGGCTTTTTAGTAGAAACTGACGTTGAGGAACGAAAGTG	Post-Bloom	0.885739	2.73865e-81		Proteobacteria_6887			Bacteria	Proteobacteria		Gammaproteobacteria	Oceanospirillales	Halomonadaceae	Candidatus Carsonella	Candidatus Carsonella ruddii		Candidatus Carsonella ruddii						Post-Bloom	NA	NA	NA			Post-Bloom	NA	NA	NA
CGTTGTTCGGAATTACTGGGCGTAAAGCGCGCGTAGGCGGACATTTAAGTCAGGGGTGAAATCCCGGGGCTCAACCCCGGAACTGCCCTTGATACTGGGTGTCTTGAGTTCGAGAGAGGTGAGTGGAATTCCGAGTGTAGAGGTGAAATTCGTAGATATTCGGAGGAACACCAGTGGCGAAGGCGGCTCACTGGCTCGATACTGACGCTGAGGTGCGAAAGTG	Post-Bloom	0.833298	3.36709e-63		Proteobacteria_5852			Bacteria	Proteobacteria		Alphaproteobacteria	Rhodobacterales	Rhodobacteraceae	Pontivivens	Pontivivens sp. MT2928		Pontivivens sp. MT2928						Post-Bloom	NA	NA	NA			Post-Bloom	NA	NA	NA
CGTTATCCGGAATCACTGGGTTTAAAGGGTGCGTAGGCGGCATTATAAGTCAGAGGTGAAAGCCCGTCGCTTAACGATGGAATTGCCTTTGATACTGTAGTGCTTGAATCAAGTTGAGGCTGGCGGAATGTGGCATGTAGCGGTGAAATGCATAGATATGCCATAGAACACCAATTGCGAAGGCAGCTGGCTGGGCTTGAATTGACGCTGAGGCACGAAAGCG	Post-Bloom	0.82639	2.7175e-61		Bacteroidetes_223			Bacteria	Bacteroidetes	FCB group	Saprospiria	Saprospirales	Haliscomenobacteraceae	Haliscomenobacter	Haliscomenobacter hydrossis	Haliscomenobacter hydrossis DSM 1100	Haliscomenobacter hydrossis DSM 1100						Post-Bloom	NA	NA	NA			Post-Bloom	NA	NA	NA
TGTTATCCGGAATCACTGGGCGTAAAGCGTCTGTAGGTGGTTTAATAAGTCAACTGTTAAATCTTAAAGCTCAACTTTGAAATCGCAGTCGAAACTATTAGACTAGAGTATAGTAGGGGTAAAGGGAATTTCCAGTGGAGCGGTGAAATGCGTAGAGATTGGAAAGAACACCGATGGCGAAGGCACTTTACTGGGCTATTACTAACACTCAGAGACGAAAGCT	Post-Bloom	0.723247	3.85979e-40		Cyanobacteria_151			Bacteria	Cyanobacteria	Cyanobacteria/Melainabacteria group		Chroococcales	Chroococcaceae	Geminocystis	Geminocystis sp. NIES-3709		Geminocystis sp. NIES-3709						Post-Bloom	Chlorophyll-a	0.38615	2.9e-06			Post-Bloom	NA	NA	NA
TGTTATCCGGAATCACTGGGCGTAAAGCGTCTGTAGGTGGTTTAATAAGTCAACTGTTAAATCTTAAAGCTCAACTTTGAAATCGCAGTCGAAACTATTAGACTAGAGTATAGTAGGGGTAAAGGGAATTTCCAGTGGAGCGGTGAAATGCGTAGAGATTGGAAAGAACACCGATGGCGAAGGCACTTTACTGGGCTATTACTGACACTCAGAGACGAAAGCT	Post-Bloom	0.710524	3.42086e-38		Cyanobacteria_151			Bacteria	Cyanobacteria	Cyanobacteria/Melainabacteria group		Chroococcales	Chroococcaceae	Geminocystis	Geminocystis sp. NIES-3709		Geminocystis sp. NIES-3709						Post-Bloom	Winter/Spring	0.200891	0.0181468			Post-Bloom	NA	NA	NA
CGTTATTCAGAATAACTGGGCGTAAAGCGTTCGTAGACTGTATAGTAAGTTAATTGTAAAATGTTAAAGCTCAACTTTAATTAAACAATTAATACTGCTTTACTATGAGTTTTATGCAGAAGAATAGAATTCCGTGAGTAAAGGTAATATTTGTAAATTTACGGAGGAATATCAGTAGTGAAGACGATTCTTTAGCAATTACTGACGTTGAGGAACGAAAGCG	Post-Bloom	0.705182	2.09269e-37		Proteobacteria_6887			Bacteria	Proteobacteria		Gammaproteobacteria	Oceanospirillales	Halomonadaceae	Candidatus Carsonella	Candidatus Carsonella ruddii		Candidatus Carsonella ruddii						Post-Bloom	Early-Summer	0.230707	0.00648149			Post-Bloom	Summer	0.144085	0.0351664
TGTTATCCGGAATCACTGGGCGTAAAGCGTCTGTAGGTGGTTTAATAAGTCGACTGTTAAATCTTGAGGCTTAACCTCAAAATCGCATTCGAAACTATTAGACTTGAGTATAGTAGAGGTAAAGGGAATTTCCAGTGGAGCGGTGAAATGCGTAGATATTGGAAAGAACACCGATGGCGAAGGCACTTTACTGGGCTATTACTGACACTCAGAGACGAAAGCT	Post-Bloom	0.701896	6.24901e-37		Cyanobacteria_148			Bacteria	Cyanobacteria	Cyanobacteria/Melainabacteria group		Synechococcales					Synechococcales						Post-Bloom	Early-Summer	0.360617	1.39e-05			Post-Bloom	NA	NA	NA
CGTTATCCGGCATGACTGGGCGTAAAGAGTCCGTAGGCTGTAAAGTAAGTTTTTCGTTAAATTTTAAAACTCAATTTTAAAATAGCGATTAATACTGCTTTACTTTGAGTTTAATACAGAAGAGTAGAATTTTATACGAAGGGGTGAAATCTGTAGATATATAAAGGAATGCCAGTAGCGAAGGCGACTCTTTGGTATAAACTGACGTTGAGGGACGAAAGTG	Post-Bloom	0.695308	5.35948e-36		Proteobacteria_6887			Bacteria	Proteobacteria		Gammaproteobacteria	Oceanospirillales	Halomonadaceae	Candidatus Carsonella	Candidatus Carsonella ruddii		Candidatus Carsonella ruddii						Post-Bloom	Winter/Spring	0.376382	5.37e-06			Post-Bloom	Winter/Spring	0.416309	2.22727e-10
CGTTATCCGGCATGACTGGGCGTAAAGAGTCCGTAGACTGTAAAGCAAGTTTTTTGTCAAATTTTAAAACTCAATTTTAAAACAGCAATTAATACTACTTTACTTCGAGTTTAATACAGAAAAGTAGAATTTTATACGAAGGGGTGAAATCTGTAGATATATAAAGGAATGCCAGTAGCGAAGGCGACTTTTTGGTATAAACTGACGTTGAGGGACGAAAGTG	Post-Bloom	0.692967	1.13445e-35		Proteobacteria_6887			Bacteria	Proteobacteria		Gammaproteobacteria	Oceanospirillales	Halomonadaceae	Candidatus Carsonella	Candidatus Carsonella ruddii		Candidatus Carsonella ruddii						Post-Bloom	NA	NA	NA			Post-Bloom	Winter/Spring	0.181564	0.00775266
TGTTATCCGGAATCACTGGGCGTAAAGCGTCTGTAGGTGGTTAAACAAGTCAACTGTTAAATCTTGAGGCTCAACTTCAAAATCGCAGTCGAAACTGTTTGACTAGAGTATAGTAGGGGTAAAGGGAATTTCCAGTGGAGCGGTGAAATGCGTAGATATTGGAAAGAACACCGATGGCGAAGGCACTTTACTGGGCTATTACTGACACTCAGAGACGAAAGCT	Post-Bloom	0.688917	4.07999e-35		Cyanobacteria_160			Bacteria	Cyanobacteria	Cyanobacteria/Melainabacteria group													Post-Bloom	Fall/Winter	0.351728	2.33e-05			Post-Bloom	NA	NA	NA
TGTTATTCATAGTTATTAGGCGTAAAGGGTTCGTAGGTTTTTTTTAAAGTTAAGTTTAAAAACCCAAAGCTTAACTTTGGGTCGGGGCTTAATACTTTTAAAATCGAGTATAAAAGGGGATAGTAGAATTTCTAATGTAGAGATAAAATTCGTTGATATTAGAAGGAATTTCAGTGGCGAAGGCGGCTATCTGGTTTAATACTGACACTGAGGGACGAAAGCT	Post-Bloom	0.688316	4.92554e-35		Proteobacteria_6887			Bacteria	Proteobacteria		Gammaproteobacteria	Oceanospirillales	Halomonadaceae	Candidatus Carsonella	Candidatus Carsonella ruddii		Candidatus Carsonella ruddii						Post-Bloom	NA	NA	NA			Post-Bloom	NA	NA	NA
TGTTATCCGGAATCACTGGGCGTAAAGCGTCTGTAGGTGGCTTAATAAGTCAACTGTTAAATCTTAAAGCTTAACTTTGAAATCGCAGTCGAAACTATTAGGCTAGAGTATAGTAGGGGTAAAGGGAATTTCCAGTGGAGCGGTGAAATGCGTAGAGATTGGAAAGAACACCGATGGCGAAGGCACTTTACTGGGCTATTACTAACACTCAGAGACGAAAGCT	Post-Bloom	0.672359	6.19496e-33		Cyanobacteria_151			Bacteria	Cyanobacteria	Cyanobacteria/Melainabacteria group		Chroococcales	Chroococcaceae	Geminocystis	Geminocystis sp. NIES-3709		Geminocystis sp. NIES-3709						Post-Bloom	Winter/Spring	0.265966	0.00161625			Post-Bloom	Winter/Spring	0.394069	2.30801e-09
CGTTATTCGGCATGACTGGGCGTAAAGGGTCCGTAGACTGCAAAGTAAGTTTTTTGTTAAATTTTAAGACCCAATCTTAATTCCGCAATTAATACTGCTTTGCTTTGAGTTTAATACAGAAAAGTAGAATTTTATACGACAGGGGTGAAATCCGTAGATATATAAAGGAATGCCAACAGCGAAGGCAACTTTTTGGTATAAACTGACGTTGAGGGACGAAAGCG	Post-Bloom	0.651678	2.11664e-30		Proteobacteria_3590			Bacteria	Proteobacteria		Betaproteobacteria			Candidatus Nasuia	Candidatus Nasuia deltocephalinicola		Candidatus Nasuia deltocephalinicola						Post-Bloom	Chlorophyll-a	0.178278	0.0364354			Post-Bloom	Chl-a	0.295707	1.08619e-05
TGTTATCCGGAATCACTGGGCGTAAAGCGTCTGTAGGTTGTTGATCAAGTCAACTGTTAAATCTTGAAGCTCAACTTCAAAATCGCAGTCGAAACTGTTTGACTAGAGTATAGTAGGGGTAAAGGGAATTTCCAGTGGAGCGGTGAAATGCGTAGATATTGGAAAGAACACCGATGGCGAAGGCACTTTACTGGGCTATTACTGACACTCAGAGACGAAAGCT	Post-Bloom	0.64163	3.06576e-29		Cyanobacteria_160			Bacteria	Cyanobacteria	Cyanobacteria/Melainabacteria group													Post-Bloom	NA	NA	NA			Post-Bloom	NA	NA	NA
TGTTATCCGGAATCACTGGGCGTAAAGCGTCTGTAGGTGGTTTAATAAGTCAACTGTTAAATCTTGAAGCTTAACTTCAAAATCGCAGTCGAAACTATTAGACTAGAGTATAGTAGGGGTAAAGGGAATTTCCAGTGGAGCGGTGAAATGCGTAGAGATTGGAAAGAACACCGATGGCGAAGGCACTTTACTGGGCTATTACTGACACTCAGAGACGAAAGCT	Post-Bloom	0.610598	6.50563e-26		Cyanobacteria_151			Bacteria	Cyanobacteria	Cyanobacteria/Melainabacteria group		Chroococcales	Chroococcaceae	Geminocystis	Geminocystis sp. NIES-3709		Geminocystis sp. NIES-3709						Post-Bloom	NA	NA	NA			Post-Bloom	Fall/Winter	0.1856	0.00647146
CGTTATCCGGAATGATTGGGCGTAAAGCGTCCGTAGGTGGTTCACGAAGCTCGCTGTCAAATCTCAGGGCTCCACCCTGTTTCGGCATCGAGGACCCGTGAACTAGAGTTTGGTAGAGGCAGGGGGAATTCCCGGTGTAGCGGTGAAATGCGTAGATATCGGGAAGAACACCATTAGCGAAGGCGCCCTGCTGGGCCAATACTGACACTAAGGGACGAGAGCT	Post-Bloom	0.604583	2.60822e-25		Cyanobacteria_129			Bacteria	Cyanobacteria	Cyanobacteria/Melainabacteria group		Oscillatoriales					Oscillatoriales						Post-Bloom	NA	NA	NA			Post-Bloom	NA	NA	NA
TGTTATCCGGAATCACTGGGCGTAAAGCGTCTGTAGGTGGTTTAATAAGTCAACTGTTAAATCTTGAAGCTTAACTTCAAAATCGCAGTCGAAACTATTAGACTAGAGTATAGTAGGGGTAAAGGGAATTTCCAGTGGAGCGGTGAAATGCGTAGAGATTGGAAAGAACACCGATGGCGAAGGCACTTTACTGGGCTATTACTAACACTCAGAGACGAAAGCT	Post-Bloom	0.60266	4.04093e-25		Cyanobacteria_151			Bacteria	Cyanobacteria	Cyanobacteria/Melainabacteria group		Chroococcales	Chroococcaceae	Geminocystis	Geminocystis sp. NIES-3709		Geminocystis sp. NIES-3709						Post-Bloom	Other	0.275461	0.00107549			Post-Bloom	Fall/Winter	0.278653	3.55474e-05
TGTTATCCGGAATCACTGGGCGTAAAGCGTCTGTAGGTTGTCGAACAAGTCAACTGTTAAATCTTGAGGCTCAACTTCAAAATCGCAGTCGAAACTGTTTGACTAGAGTATAGTAGGGGTAAAGGGAATTTCCAGTGGAGCGGTGAAATGCGTAGATATTGGAAAGAACACCGATGGCGAAGGCACTTTACTGGGCTATTACTGACACTCAGAGACGAAAGCT	Post-Bloom	0.599448	8.3386e-25		Cyanobacteria_160			Bacteria	Cyanobacteria	Cyanobacteria/Melainabacteria group													Post-Bloom	Winter/Spring	0.181512	0.0331201			Post-Bloom	NA	NA	NA
TGTTATCCGGAATCACTGGGCGTAAAGCGTCTGTAGGTGGTTTAATAAGTCAACTGTTAAATCTTGAGGCTCAACCTCGAAATCGCAGTCGAAACTATTAGACTAGAGTATAGTAGGGGTAAAGGGAATTTCCAGTGGAGCGGTGAAATGCGTAGAGATTGGAAAGAACACCGATGGCGAAGGCACTTTACTGGGCTATTACTAACACTCAGAGACGAAAGCT	Post-Bloom	0.590405	6.14275e-24		Cyanobacteria_151			Bacteria	Cyanobacteria	Cyanobacteria/Melainabacteria group		Chroococcales	Chroococcaceae	Geminocystis	Geminocystis sp. NIES-3709		Geminocystis sp. NIES-3709						Post-Bloom	Early-Summer	0.304089	0.000287849			Post-Bloom	NA	NA	NA
CGTTATCCGGAATCATTGGGCGTAAAGCGCCTGTAGGTCGTTTAATAAGTCCGTTGTTAAAGACTAGGGCTTAACCCTAGGAAAGCGATGGAAACTGATAGACTTGAGTATGGCAGGGGTAGAGGGAATTTCTAGTGTAGCGGTGAAATGCGTAGATATTAGAAAGAACACCGGTGGCGAAAGCGCTCTACTGGACCATTACTGACACTGAGAGGCGAAAGCT	Post-Bloom	0.586181	1.52827e-23		Cyanobacteria_148			Bacteria	Cyanobacteria	Cyanobacteria/Melainabacteria group		Synechococcales					Synechococcales						Post-Bloom	NA	NA	NA			Post-Bloom	NA	NA	NA
CGTTATCCGGATTTATTGGGTTTAAAGGGTTCGTAGGCGGACTATTAAGTCAGTGGTGAAAGCCCACAGCTCAACTGTGGAACTGCCATTGATACTGATAGTCTTGAATATAGTTGAAGTTAGCGGAATGTGTCATGTAGCGGTGAAATGCTTAGATATGACACAGAACACCGATTGCGAAGGCAGCTAACTAAGCTATCATTGACGCTGAGGAACGAAAGCG	Post-Bloom	0.585289	1.84965e-23		Bacteroidetes_518			Bacteria	Bacteroidetes	FCB group	Flavobacteriia	Flavobacteriales	Schleiferiaceae	Owenweeksia	Owenweeksia hongkongensis	Owenweeksia hongkongensis DSM 17368	Owenweeksia hongkongensis DSM 17368						Post-Bloom	Early-Summer	0.270986	0.00130546			Post-Bloom	Summer	0.239293	0.000413222
TGTTATTCGAAATTACTGGGCGTAAAGGGTAACTAGGTTGTTGAATCAGTTATATATTAAAGGTCGGAGCTCAACTCCGGTATGGTATTTAATACTATTCAACTAGAATCGAATAGAGGATAATAGAATTCTTAGTGGAGGGTTAAGTTCCGTAGATCCTAAGAGGAATATCTATAGCGAAGGCAATTATCTGGGTTTTGATTGACACTGATGTTTACGAAGGCG	Post-Bloom	0.582647	3.24309e-23		Proteobacteria_6887			Bacteria	Proteobacteria		Gammaproteobacteria	Oceanospirillales	Halomonadaceae	Candidatus Carsonella	Candidatus Carsonella ruddii		Candidatus Carsonella ruddii						Post-Bloom	NA	NA	NA			Post-Bloom	Summer	0.226251	0.000856952
TGTTATTCAAAATTACTGGGCGTAAAGAGTACGTAGGCGGTTTATTAAGTTATATATGAAAGCCCTGAGCATAACTTAGGAAGAATATATAAAACAGGTAAACTAGAATTAAATAGAGGATAGTGGAATTTCTCATGTAGGGTTAAGTTCTTAAGATATGAGAAGGAACATCAGAGGCGAAGGCGACTATCTAGATTTATATTGACGCTAAGGTACGAAGGCG	Post-Bloom	0.574062	1.94304e-22		Proteobacteria_4404			Bacteria	Proteobacteria		Oligoflexia	Bacteriovoracales					Bacteriovoracales						Post-Bloom	Early-Summer	0.187641	0.027535			Post-Bloom	NA	NA	NA
CGTTATCCGGAATCATTGGGTTTAAAGGGTCCGTAGGTGGATAATTAAGTCAGAGGTGAAATCCTGCAGCTCAACTGTAGAATTGCCTTTGATACTGGTTATCTTGAGTTATTATGAAGTAGTTAGAATATGTAGTGTAGCGGTGAAATGCATAGATATTACATAGAATACCAATTGCGAAGGCAGATTACTAATAATCAACTGACACTGATGGACGAAAGCG	Post-Bloom	0.564737	1.28087e-21		Bacteroidetes_1014			Bacteria	Bacteroidetes	FCB group	Flavobacteriia	Flavobacteriales	Flavobacteriaceae	Lacinutrix	Lacinutrix venerupis		Lacinutrix venerupis						Post-Bloom	NA	NA	NA			Post-Bloom	NA	NA	NA
TGTTATCCGGAATCACTGGGCGTAAAGCGTCTGTAGGTGGTTTAGTAAGTCGACTGTTAAATCTTGAGGCTTAACCTCAAAATCGCATTCGAAACTATTAGACTTGAGTATAGTAGAGGTAAAGGGAATTTCCAGTGGAGCGGTGAAATGCGTAGATATTGGAAAGAACACCGATGGCGAAGGCACTTTACTGGGCTATTACTGACACTCAGAGACGAAAGCT	Post-Bloom	0.556665	6.2516e-21		Cyanobacteria_148			Bacteria	Cyanobacteria	Cyanobacteria/Melainabacteria group		Synechococcales					Synechococcales						Post-Bloom	Chlorophyll-a	0.211956	0.0125713			Post-Bloom	Chl-a	0.282506	2.73763e-05
TGTTATCCGGAATTATTGGGCGTAAAGCGTCTGTAGGTTGATAATTAAGTCTTTTGTTAAACCTTCGGGCTCAACCCGAAATCTGCAAAAGAAACTATTTATCTTGAGTATGGTAGAGGTAAAGGGAATTTCCAGTGGAGCGGTGAAATGCGTAGATATTGGAAAGAACACCAACAGCGAAGGCACTTTACTGGGCCATTACTGACACTCAGAGACGAAAGCT	Post-Bloom	0.542942	8.40203e-20		Cyanobacteria_209			Bacteria	Cyanobacteria	Cyanobacteria/Melainabacteria group		Synechococcales	Prochlorotrichaceae	Halomicronema	Halomicronema hongdechloris	Halomicronema hongdechloris C2206	Halomicronema hongdechloris C2206						Post-Bloom	NA	NA	NA			Post-Bloom	NA	NA	NA
TGTTATCCGGAATTATTGGGCGTAAAGCGTCTGTAGGTGGTTTAATAAGTCTGTTGTTAAAGCCCGAGGCTCAACTTCGGAGATGCAGTGGAAACTGTTAAACTAGAGTATAATTGAAGTAGAAGGAATTTCCAGTGGAGTGGTGAAATACGTAGATATTGGAAAGAACACCAATTGCGAAAGCATTCTATTAGATTATTCTGACACTCAGAGACGAAAGCT	Post-Bloom	0.541861	1.02591e-19		Cyanobacteria_159			Bacteria	Cyanobacteria	Cyanobacteria/Melainabacteria group													Post-Bloom	Winter/Spring	0.207856	0.0144321			Post-Bloom	Winter/Spring	0.143303	0.036181
TGTTATTCGGAATGACTGGGTGTAAAGAGTCTGTAGGCGGTTTTTTAAGTTGAAATATAAATCTTGTAGCTTGACTTCAAGAAAGGTTTCAAAACTGAAAGACTAGAGTTTGATAGGGGAAAGTAGAATTTCTAATGGAGGGATAAAATTCATAGATATTAGAAGGAATACCAGAGGCGAAGGCGACTTTCTGGATCAAAACTGACGCTGAGAGACGAAAGCA	Post-Bloom	0.53135	6.88908e-19		Proteobacteria_7925			Bacteria	Proteobacteria		Gammaproteobacteria			Candidatus Nardonella	Candidatus Nardonella dryophthoridicola		Candidatus Nardonella dryophthoridicola						Post-Bloom	NA	NA	NA			Post-Bloom	NA	NA	NA
CGTTATCCGGAATCATTGGGCGTAAAGCGTCTGTAGGTGGCTTGGTAAGTCTGCTGTTAAAGAGTACAGCTTAACTGTATAAAGGCAGTGGAAACTACTAGGCTTGAGTGTGGTAGGGGCAGAGGGAATTCCCGGTGTAGCGGTGAAATGCGTAGATATCGGGAAGAACACCAACGGCGAAAGCACTCTGCTGGGCCAACACTGACACTCAGAGACGAAAGCT	Post-Bloom	0.528732	1.09581e-18		Cyanobacteria_221			Bacteria	Cyanobacteria	Cyanobacteria/Melainabacteria group		Synechococcales	Synechococcaceae	Synechococcus	Synechococcus sp. Minos11		Synechococcus sp. Minos11						Post-Bloom	NA	NA	NA			Post-Bloom	NA	NA	NA
TGTTATCCGGAATCACTGGGCGTAAAGCGTCTGTAGGTGGTTTAGTAAGTCAACTGTTAAATCTTGAAGCTTAACTTCAAAATCGCAGTCGAAACTATTAGACTAGAGTATAGTAGGGGTAAAGGGAATTTCCAGTGGAGCGGTGAAATGCGTAGAGATTGGAAAGAACACCGATGGCGAAGGCACTTTACTGGGCTATTACTGACACTCAGAGACGAAAGCT	Post-Bloom	0.523142	2.91298e-18		Cyanobacteria_151			Bacteria	Cyanobacteria	Cyanobacteria/Melainabacteria group		Chroococcales	Chroococcaceae	Geminocystis	Geminocystis sp. NIES-3709		Geminocystis sp. NIES-3709						Post-Bloom	Chlorophyll-a	0.293268	0.000481455			Post-Bloom	Winter/Spring	0.358384	6.96075e-08
TGTTATCCGGAATCACTGGGCGTAAAGCGTCTGTAGGTGGTTGGACAAGTCAACTGTTAAATCTTGAGGCTCAACTTCAAAATCGCAGTCGAAACTGTTTGACTAGAGTATAGTAGGGGTAAAGGGAATTTCCAGTGGAGCGGTGAAATGCGTAGATATTGGAAAGAACACCGATGGCGAAGGCACTTTACTGGGCTATTACTGACACTCAGAGACGAAAGCT	Post-Bloom	0.519831	5.15343e-18		Cyanobacteria_160			Bacteria	Cyanobacteria	Cyanobacteria/Melainabacteria group													Post-Bloom	NA	NA	NA			Post-Bloom	NA	NA	NA
CGTTATCCGGATTTATTGGGCGTAAAGCGCCTGTAGGTTGTTTAATAAGTCTGTTGTTAAAGACTAGGGCTCAACCCTGGGAAAGCAATGGAAACTGATAAACTTGAGTATGGCAGGGGTAGAGGGAATTTCTAGTGTAGCGGTGAAATGCGTAGATATTAGAAAGAACACCGGTGGCGAAAGCGCTCTACTGGACCATTACTGACACTCAGAGGCGAAAGCT	Post-Bloom	0.514359	1.30547e-17		Cyanobacteria_148			Bacteria	Cyanobacteria	Cyanobacteria/Melainabacteria group		Synechococcales					Synechococcales						Post-Bloom	Winter/Spring	0.271079	0.00130024			Post-Bloom	NA	NA	NA
CGTTATCCGGAATCATTGGGCGTAAAGCGCCTGTAGGTGGCTTAGTAAGTCTGTTGTTAAAGGTTAGGGCTCAACCCTAAAAAAGCAATGGAAACTGCCAAGCTTGAGTATGGTAGGGGTAGAGGGAATTTCTAGTGTAGCGGTGAAATGCGTAGATATTAGAAAGAACACCGGTGGCGAAAGCGCTCTACTGGGCCATTACTGACACTCAGAGGCGAAAGCT	Post-Bloom	0.513186	1.58989e-17		Cyanobacteria_148			Bacteria	Cyanobacteria	Cyanobacteria/Melainabacteria group		Synechococcales					Synechococcales						Post-Bloom	Chlorophyll-a	0.502995	3.23e-10			Post-Bloom	Chl-a	0.685832	4.37742e-31
CGTTATCCGGAATGATTGGGCGTAAAGCGTCTGTAGGTGGTTTTTTAAGTCTATGGTTAAACGGTAGGGCTCAACTCTATTATGGCCATAGAAACTAAGAAACTTGAGTGTAGCAGGAGTAGAGGGAATTACCAGTGTAACGGTGAAATGTGTAGATATTGGTAAGAACACCAACGGCGAAGGCACTCTACTGGACTATTACTGACACTGAGAGACGAAACCT	Post-Bloom	0.51068	2.41633e-17		Cyanobacteria_159			Bacteria	Cyanobacteria	Cyanobacteria/Melainabacteria group													Post-Bloom	Chlorophyll-a	0.238842	0.00478459			Post-Bloom	NA	NA	NA
GGTTATTCACAATGATTGGGTGTAAAGCAGGACACGGTGATAAGTACAAGTGGAACGCTTTCCGAGGGCCCAACCTGAGGAAAAGTGTTCCAAACTAACTTGCTGGAGGTTTGATAGAGTTGAAAGCGGAACTACTGGGGGAGAGGTGTAATTCGTTTTATCTCAGTAGGAACACCAAAAGCGAAAAGCAGCCAACAAATCAAAACCTTCCACTATACCTGTAACCT	Post-Bloom	0.495088	3.02783e-16		Fusobacteria_34			Bacteria	Fusobacteria		Fusobacteriia	Fusobacteriales	Leptotrichiaceae				Leptotrichiaceae						Post-Bloom	Late-Summer	0.202962	0.0169644			Post-Bloom	Summer	0.195345	0.00412287
TGTTATCCGGAATCACTGGGCGTAAAGCGTCTGTAGGTGGTTTAGTAAGTCTGTTGTTAAATCTTGAAGCTTAACTTCAAACCAGCAATGGAAACTACTAGACTTGAGTATGGTAGAGGTAAGAGGAATTTCCAGTGGAGCGGTGAAATGCGTAGATATTGGAAAGAACACCGATGGCGAAGGCATCTTACTGGGCCATTACTGACACTCAGAGACGAAAGCT	Post-Bloom	0.48451	1.56602e-15		Cyanobacteria_148			Bacteria	Cyanobacteria	Cyanobacteria/Melainabacteria group		Synechococcales					Synechococcales						Post-Bloom	NA	NA	NA			Post-Bloom	Summer	0.225119	0.000911201
TGATAATTTGATATTTGGTTTAAAACATGGGATAGCTGATTAAATAAGTTAAATATAAAATTCTAAAAAAAATTTAGAAAGGTATTTAAGACTATATAAATTGAGAAAGGGCGAAGTTAATAGAATTATAAGTGTAACGGTTAAATGTGATGATCCTTATAAGACTCTCAATAGCGAAGGCAATTAACTTGAACTTATCTGACAGTGATCCATGAAAGTT	Post-Bloom	0.483715	1.7679e-15		Proteobacteria_3590			Bacteria	Proteobacteria		Betaproteobacteria			Candidatus Nasuia	Candidatus Nasuia deltocephalinicola		Candidatus Nasuia deltocephalinicola						Post-Bloom	NA	NA	NA			Post-Bloom	NA	NA	NA
CGTTATCCGGAATCACTGGGTTTAAAGGGTGCGTAGGCGGCTATATAAGTCAGAGGTGAAAGCCCGGCGCTCAACGTCGGAATTGCCCCTGATACTGTATAGCTTGAATCATGCTGAGGTCGGCGGAATGAGTCATGTAGCGGTGAAATGCATAGATATGACTTAGAACACCAATTGCGAAGGCAGCTGGCTGGGTATGAATTGACGCTGAGGCACGAAAGCG	Post-Bloom	0.481997	2.29465e-15		Bacteroidetes_223			Bacteria	Bacteroidetes	FCB group	Saprospiria	Saprospirales	Haliscomenobacteraceae	Haliscomenobacter	Haliscomenobacter hydrossis	Haliscomenobacter hydrossis DSM 1100	Haliscomenobacter hydrossis DSM 1100						Post-Bloom	NA	NA	NA			Post-Bloom	NA	NA	NA
GGTTCTGGATGATGATTGGGTGTAAAGCAGGATAAGGTGGTAAGTACAAGTTTGACGTCGACTGACCGAAAGGAAAGGAGGATTTCAAAAACTAACTTACTTGAGGGATCTCTAAGTTGAAAGCGGAACTCTATGGGGAGCGGTGTAATGCATTTCATCTATAGAGGAACATCGAAGACGATAAGTAGCCAACTAAAGATACCCTGCCACTAGACCTGAAACCT	Post-Bloom	0.475192	6.35839e-15		Proteobacteria_3590			Bacteria	Proteobacteria		Betaproteobacteria			Candidatus Nasuia	Candidatus Nasuia deltocephalinicola		Candidatus Nasuia deltocephalinicola						Post-Bloom	Spring	0.294913	0.000445814			Post-Bloom	NA	NA	NA
CGTTATCCATAATTACTGGGCGTACAGAGTCCGTAGATTGTATTATAAGTTATATCTTAAAATTTAAAGCTCAACTTTAAAAAAAGATATAATACTGTTTTACTTGAGTTTGGTACGGAAAAGTAGAATTTCATGTTAAGGCGTAAATTCCAAAAATACATGAAGGAACATCATAAGCGAAAGCGACTTTTTAGTATAAACTGACATTGAGGGACGAAAGTG	Post-Bloom	0.47247	9.49927e-15		Proteobacteria_6887			Bacteria	Proteobacteria		Gammaproteobacteria	Oceanospirillales	Halomonadaceae	Candidatus Carsonella	Candidatus Carsonella ruddii		Candidatus Carsonella ruddii						Post-Bloom	Spring	0.215192	0.011254			Post-Bloom	Winter/Spring	0.230499	0.000678707
CATTAATCGGAATTATTGGGCGTAAAGAGTTTGTAGGTGGTATGCTAAGTTGAAGGTGAAAAATCAGGGCTTAACCCTGTACAGCCTCCAAAACTAGTATACTAGAGTCGTGTAGAGGATTATAGAATTCTTGGTGGAGCGCTGAAATGCTTAGATATCAAGAGGAAAACCAACAGCGAAGGCAATAGTCTAGGCACTGACTGACACTGAGAAACGAAAGTG	Post-Bloom	0.458382	7.17065e-14		Spirochaetes_30			Bacteria	Spirochaetes		Spirochaetia	Leptospirales	Leptospiraceae	Turneriella	Turneriella parva	Turneriella parva DSM 21527	Turneriella parva DSM 21527						Post-Bloom	Spring	0.256974	0.00234575			Post-Bloom	Chl-a	0.22526	0.000904264
CGTTATCCGAAATTATTGGGCGTAAAGTGTCCGTAGACTGTAATATAAGTTATTTGTTAAATTTTAAAGCTTAACTTTAAAATAGCATTTAATACTGTTTTACTTGAGTTTTATACAGAAAAATAGAATTTCAAATGTAGGGGTAATTTCCGTAGATATGTGAAGGAACACCAATAGCGAAGGCAATTTTTTAGTAAAAACTGACGTTGAGGGACGAAAGTA	Post-Bloom	0.450152	2.2391e-13		Proteobacteria_4980			Bacteria	Proteobacteria		Gammaproteobacteria	Alteromonadales	Alteromonadaceae	Glaciecola	Glaciecola amylolytica		Glaciecola amylolytica						Post-Bloom	Early-Summer	0.266419	0.00158561			Post-Bloom	Summer	0.304804	5.59057e-06
CGTTATTCAAAATAACTGGGCGTAAAGGGTTCGTAGATTGTGTAGTAAGTTACTTTAAAAGCTAGAAGTCAACCTTTAGTTAAAGCTAACCCTGCTTCACTTGAGTAATTATCAAAAGAATAGAATTCTGTAAGAAGAGATAAAATTCACAGATAAACAGAAGAACACCTATATAGCGTAAGCAATTCTTTAGTATTTACTGACGTTGAGGAACGAAAGTT	Post-Bloom	0.447885	3.04759e-13		Proteobacteria_6887			Bacteria	Proteobacteria		Gammaproteobacteria	Oceanospirillales	Halomonadaceae	Candidatus Carsonella	Candidatus Carsonella ruddii		Candidatus Carsonella ruddii						Post-Bloom	Early-Summer	0.181804	0.0328341			Post-Bloom	NA	NA	NA
CGTTATTCGTTGTAATTTGGCGTAAAGGGTTCGTAGGTGGCATTAAGGTTGTTTAAAATAAAATTTGAAAGCTTAACTTTCAGTAATTTAAAAACACTTTTGCTTGAGTATAAGAGAAGATTATGGAATTTTAGAAGGATAGGTAAAATTTGAAGAGTTTTGAAGGAACATCTATAGCGAAAGCAATAATCTGGTTTATTTAATACTGACGCTGAGGAACGAAAGAA	Post-Bloom	0.441018	7.64775e-13		phylum_reps_2497																		Post-Bloom	Chlorophyll-a	0.177752	0.0370003			Post-Bloom	Chl-a	0.320476	1.68803e-06
CGTTATCCGGCATGACTGGGCGTAAAGAGTCCGTAGACTGTAAAGTAAGTTTCTTGTTAAATTTTAAAACTTAATTTTAAAACAGCAATTAATACTGCTTTACTTTGAGTTTAATACAGAAAAGTAGAATTTTATACGATAGGGGTGAAATCTGTAGATATATAAAGGAATGCCAGTAGCGAAGGCGACTTTTTAGTATAAACTGACGTTGAGGGACGAAAGTG	Post-Bloom	0.440994	7.67274e-13		Proteobacteria_4980			Bacteria	Proteobacteria		Gammaproteobacteria	Alteromonadales	Alteromonadaceae	Glaciecola	Glaciecola amylolytica		Glaciecola amylolytica						Post-Bloom	NA	NA	NA			Post-Bloom	NA	NA	NA
CGTTATTCAGATTGATTGGGCGTAAAGCGCTCGTAGGTTGTTTATAAAACTCTTTGTTAAAGGTGAGAACTTAATTTTGACTAAGCATGGAAAACTTATAGACTTGAGTATAGTGTTGGTATTAAGAATTTCCAGCGTAGAAATGAAATTCGTAGATTTTGGAACGAATGCCAGGAGCGAAAGTGTATTACTATGCTATTTACTGACATTGAAGAGCGAAAGCT	Post-Bloom	0.437074	1.28532e-12		Proteobacteria_3590			Bacteria	Proteobacteria		Betaproteobacteria			Candidatus Nasuia	Candidatus Nasuia deltocephalinicola		Candidatus Nasuia deltocephalinicola						Post-Bloom	NA	NA	NA			Post-Bloom	NA	NA	NA
TGTTATCCGGAATCACTGGGCGTAAAGCGTCTGTAGGTGGTTAAACAAGTCAACTGTTAAATCTTGAGGCTTAACTTCAAAATCGCAGTCGAAACTGTTTGACTAGAGTATAGTAGGGGTAAAGGGAATTTCCAGTGGAGCGGTGAAATGCGTAGATATTGGAAAGAACACCGATGGCGAAGGCACTTTACTGGGCTATTACTGACACTCAGAGACGAAAGCT	Post-Bloom	0.423762	7.06055e-12		Cyanobacteria_160			Bacteria	Cyanobacteria	Cyanobacteria/Melainabacteria group													Post-Bloom	NA	NA	NA			Post-Bloom	NA	NA	NA
CGTTATCCGGAATTATTGGGCGTAAAGCGTCTGTAGGTGGCTTAGTAAGTCTACTGTTAAATACTAGGGCTTAACTCTGGAACGGCAGTGGAAACTACTAGGCTTGAGTACGGTAGAAGTAAAGGGAATTCCCAGTGTAGCGGTGAAATGCGTAGATATTGGGAAGAACACCAACGGCGAAAGCACTTTACTAGGCCGACACTGACACTAAGAGACGAAAGCT	Post-Bloom	0.421743	9.08387e-12		Cyanobacteria_148			Bacteria	Cyanobacteria	Cyanobacteria/Melainabacteria group		Synechococcales					Synechococcales						Post-Bloom	Winter/Spring	0.356928	1.73e-05			Post-Bloom	Winter/Spring	0.470141	3.63266e-13
CGTTATCCGGATTCATTGGGTTTAAAGGGTCCGTAGGCGGATTTTTAAGTCAGTGGTGAAAGCCGACAGCTCAACTGTCGAACTGCCATTGATACTGGAAATCTTGAGTACAAATGAAGTAGGCGGAATGAGTCATGTAGCGGTGAAATGCATAGATATGACTCAGAACACCAATTGCGAAGGCAGCTTACTAACATGTAACTGACGCTGAGGGACGAAAGCG	Post-Bloom	0.421377	9.50666e-12		Bacteroidetes_518			Bacteria	Bacteroidetes	FCB group	Flavobacteriia	Flavobacteriales	Schleiferiaceae	Owenweeksia	Owenweeksia hongkongensis	Owenweeksia hongkongensis DSM 17368	Owenweeksia hongkongensis DSM 17368						Post-Bloom	Winter/Spring	0.371525	7.24e-06			Post-Bloom	Winter/Spring	0.372909	1.82787e-08
TGTTATCCGGAATTATTGGGCGTAAAGCGTCTGTAGGTTGATAATTAAGTCTTTTGTTAAACCTTCGGGCTCAACCCGAAATCTGCAAAAGAAACTATTTATCTTGAGTATGGTAGAGGTAAAGGGAATTTCCAGTGGAGCGGTGAAATGCGTAGATATTGGAAAGAACACCAACAGCGAAGGCACTTTACTGGGCCATTACTGACACTGAGAGACGAAAGCT	Post-Bloom	0.413907	2.37703e-11		Cyanobacteria_209			Bacteria	Cyanobacteria	Cyanobacteria/Melainabacteria group		Synechococcales	Prochlorotrichaceae	Halomicronema	Halomicronema hongdechloris	Halomicronema hongdechloris C2206	Halomicronema hongdechloris C2206						Post-Bloom	Spring	0.225675	0.00778188			Post-Bloom	Chl-a	0.210026	0.00200866
CGTTAATCGGAATTACTGGGCGTAAAGCGTACGCAGGCGGTTGATTAAGCGAGATGTGAAATCCCTGGGCTCAACCCAGGAACTGCATTTCGAACTGGTCAACTAGAGTATGAGAGAGGGTGGTAGAATTTCAGGTGTAGCGGTGAAATGCGTAGAGATCTGAAGGAATACCGATGGCGAAGGCAGCCACCTGGTTCAATACTGACGCTCATGTACGAAAGCG	Post-Bloom	0.406362	5.8642e-11		Proteobacteria_7153			Bacteria	Proteobacteria		Gammaproteobacteria	Alteromonadales	Pseudoalteromonadaceae	Pseudoalteromonas			Pseudoalteromonas						Post-Bloom	NA	NA	NA			Post-Bloom	NA	NA	NA
CGTTATCCGGAATCATTGGGCGTAAAGCGCCTGTAGGTTGTTTAATAAGTCCGTTGTTAAAGACTAGGGCTCAACCCTAGAGCAGCAATGGAAACTACTAGACTAGAGTATGGCAGGGGTAGAGGGAATTTCTAGTGTAGCGGTGAAATGCGTAGATATTAGAAAGAACACCGGTGGCGAAAGCGCTCTACTGGACCATTACTGACACTCAGAGGCGAAAGCT	Post-Bloom	0.404757	7.08566e-11		Cyanobacteria_135			Bacteria	Cyanobacteria	Cyanobacteria/Melainabacteria group													Post-Bloom	Spring	0.180862	0.0337658			Post-Bloom	Chl-a	0.180317	0.00819176
TGTTATCCGGAATCACTGGGCGTAAAGCGTCTGTAGGTTGTTGTTTAAGTCAACTGTTAAATCTTGAGGCTCAACTTCAAAATCGCAGTCGAAACTATTCAACTTGAGTATAGTAGGGGTAAAGGGAATTTCCAGTGGAGCGGTGAAATGCGTAGATATTGGAAAGAACACCGATGGCGAAGGCACTTTACTGGGCTATTACTGACACTCAGAGACGAAAGCT	Post-Bloom	0.396753	1.79311e-10		Cyanobacteria_148			Bacteria	Cyanobacteria	Cyanobacteria/Melainabacteria group		Synechococcales					Synechococcales						Post-Bloom	NA	NA	NA			Post-Bloom	Fall/Winter	-0.138422	0.0430907
CGTTAATCGGAATTACTGGGCGTAAAGCGCGCGTAGGTGGGTAGTTAAGTTATGTGTGAAAGCCCCGGGCTCAACCTGGGAATTGCACGTAAGACTGGCTATCTAGAGTATAGTAGAGGGAAGTAGAATTTCCGGTGTAGCGGTGAAATGCATAGATATCGGAAGGAATACCAGTGGCGAAGGCGACTTCCTGGGCTATTACTGACACTGAGGCGCGAAAGCG	Post-Bloom	0.395788	2.00228e-10		Proteobacteria_6625			Bacteria	Proteobacteria		Gammaproteobacteria	Legionellales	Coxiellaceae	Coxiella			Coxiella						Post-Bloom	Fall/Winter	0.173689	0.0416165			Post-Bloom	NA	NA	NA
CGTTGTTCGGAATTACTGGGCGTAAAGGGAGCGCAGGCGGTTCATTAAGTTAGGCGTGAAAGCCCCGGGCTCAACCTGGGAACTGCGCTTAATACTGATGAACTAGAAAACAGGAGAGGGTAGTGGAATTTCCAGTGTAGAGGTGAAATTCGTAGATATTGGAAAGAACACCGGTGGCGAAAGCGGCTACCTGGCCTGATTTTGACGCTGAGGCTCGAAAGCG	Post-Bloom	0.374523	2.082e-09		Proteobacteria_6566			Bacteria	Proteobacteria	SAR116 cluster	Alphaproteobacteria			Candidatus Puniceispirillum	Candidatus Puniceispirillum marinum	Candidatus Puniceispirillum marinum IMCC1322	Candidatus Puniceispirillum marinum IMCC1322						Post-Bloom	NA	NA	NA			Post-Bloom	Summer	0.234102	0.00055508
GGTTCTAGATGATGATTGGGTGTAAAGCAGGATAAGGTGATACGTACAAGTTTGACGTCGACTGACCGAAAGGAAAGGAGGATGTCAAAAACTCACGTATGTGAGGTAGGGTGAAGTTGAAAGCGGAACTTTCTGGGTAGCGGTGTAATGCGTTTCATCTAGAAAGGAACACCGAAGGTGACAAACAGCCAACTACCCCTCACCTGCCACTAGACCTGAAACCT	Post-Bloom	0.372255	2.64663e-09		phylum_reps_2497																		Post-Bloom	NA	NA	NA			Post-Bloom	Summer	0.271994	5.53278e-05
TGTTATCCGGAATCACTGGGCGTAAAGCGTCTGTAGGTTGTTAAACAAGTCAACTGTTAAATCTTGAGGCTCAACTTCAAAATCGCAGTCGAAACTGTTTGACTAGAGTATAGTAGGGGTAAAGGGAATTTCCAGTGGAGCGGTGAAATGCGTAGATATTGGAAAGAACACCGATGGCGAAGGCACTTTACTGGGCTATTACTGACACTCAGAGACGAAAGCT	Post-Bloom	0.368266	4.01833e-09		Cyanobacteria_160			Bacteria	Cyanobacteria	Cyanobacteria/Melainabacteria group													Post-Bloom	Chlorophyll-a	0.573342	1.99e-13			Post-Bloom	NA	NA	NA
CGTTATCCGGAATCATTGGGTTTAAAGGGTCCGTAGGCGGTCTTTTAAGTCAGAGGTGAAATCCTACAGCTCAACTGTAGAATTGCCTTTGATACTGAAGGACTTGAGTTATTGTGAAGTAGTTAGAATGTGTGGTGTAGCGGTGAAATGCATAGAGATCACACAGAATACCGATTGCGAAGGCAGATTACTAACAATATACTGACGCTGAGGGACGAAAGCG	Post-Bloom	0.368076	4.09842e-09		Bacteroidetes_1111			Bacteria	Bacteroidetes	FCB group	Flavobacteriia	Flavobacteriales	Flavobacteriaceae				Flavobacteriaceae						Post-Bloom	Spring	0.628452	1.56e-16			Post-Bloom	Chl-a	0.602836	1.45748e-22
CGTTGTCCGGAATTATTGGGCGTAAAGAGCTCGTAGGCGGTTTGTCACGTCTGCTGTGAAATTTCGAGGCTCAACCTCGAACTTGCAGTGGGTACGGGCAGGCTAGAGTGCGGTAGGGGAGATGGGAATTCCTGGTGTAGCGGTGGAATGCGCAGATATCAGGAGGAACACCAATGGCGAAGGCACATCTCTGGGCCGTAACTGACGCTGAGGAGCGAAAGCG	Post-Bloom	0.365764	5.20661e-09		Actinobacteria_1933			Bacteria	Actinobacteria	Terrabacteria group	Actinobacteria	Micrococcales	Microbacteriaceae	Candidatus Aquiluna	Candidatus Aquiluna sp. 15G-AUS-rot		Candidatus Aquiluna sp. 15G-AUS-rot						Post-Bloom	NA	NA	NA			Post-Bloom	Chl-a	0.210418	0.00196915
TGTTATTCACAGTTATTAGGCGTAAAGGGTTCGTAGGTTTTTTTCAAAGTTAAACTTCAAAGACCTAGGCTTAACTTAGGTTTATAGTTTAATACTTTTAAAATAGAGTATAGTAGGGGGTAATAGAATTTCTAATGTAAAGATAAAATTTTTCAATATTAGAAGGAATTCCAGAGGCGAAGGCGATTACCTGGGCTAATACTGACACTGAGGAACGAAAGCT	Post-Bloom	0.357186	1.24429e-08		Proteobacteria_6887			Bacteria	Proteobacteria		Gammaproteobacteria	Oceanospirillales	Halomonadaceae	Candidatus Carsonella	Candidatus Carsonella ruddii		Candidatus Carsonella ruddii						Post-Bloom	Winter/Spring	0.20481	0.0159662			Post-Bloom	NA	NA	NA
TGTTATCCGGAATCACTGGGCGTAAAGCGTCTGTAGGTGGTTAAGCAAGTCAACTGTTAAATCTTGAGGCTCAACTTCAAAATCGCAGTCGAAACTGTTTGACTAGAGTATAGTAGGGGTAAAGGGAATTTCCAGTGGAGCGGTGAAATGCGTAGATATTGGAAAGAACACCGATGGCGAAGGCACTTTACTGGGCTATTACTGACACTCAGAGACGAAAGCT	Post-Bloom	0.356179	1.37598e-08		Cyanobacteria_160			Bacteria	Cyanobacteria	Cyanobacteria/Melainabacteria group													Post-Bloom	Spring	0.450021	3.07e-08			Post-Bloom	Fall/Winter	0.148778	0.0295694
CGTTATCCGGAATCATTGGGCGTAAAGCGTCTGTAGGTGGTTTAGCAAGTCTACTGTCAAAGACTAGGGCTTAACCCTGGAAAGGCAGTGGATACTGCTAGGCTTGAGTACGGTAGGGGCAGAGGGAATTCCCGGTGTAGCAGTGAAATGTGTAGAGCTCGGGAAGAACACCAATGGCGAAAGCACTCTGCTGGGCCGTGACTGACACTGAGAGACGAAAGCT	Post-Bloom	0.353226	1.84457e-08		Cyanobacteria_46			Bacteria	Cyanobacteria	Cyanobacteria/Melainabacteria group							Cyanobacteria/Melainabacteria group						Post-Bloom	Other	0.304699	0.000279456			Post-Bloom	Winter/Spring	0.291222	1.49466e-05
CGTTATTCGGAATAACTGGGCGTAAAGGGTTTGTAGACGGTAAATTTCTATTAAAGGTGAAATATGTAAGCTTAACTTTCATAAGCCTTTATATTTGATTTACTTGAGTTAGAGAGAGGGTAGCAGAATTTTTCAAGTAGGGGTTAAATCCAAAAAGATGAAAAAGAATACCAGAAGCGAAGGCGGTTATCTGGCTCTATACTGACGTTGAGGAACTAAAGCG	Post-Bloom	0.348586	2.90547e-08		Proteobacteria_6887			Bacteria	Proteobacteria		Gammaproteobacteria	Oceanospirillales	Halomonadaceae	Candidatus Carsonella	Candidatus Carsonella ruddii		Candidatus Carsonella ruddii						Post-Bloom	NA	NA	NA			Post-Bloom	NA	NA	NA
CGTTATCCGGAATCATTGGGCGTAAAGCGCCTGTAGGTTGTTTAGTAAGTCTGTTGTTAAAGACTAAGGCTTAACCTTAGGAAAGCGATGGAAACTACTAGACTTGAGTATGGCAGGGGTAGAGGGAATTTCTAGTGTAGCGGTGAAATGCGTAGATATTAGAAAGAACACCAGCGGCGAAAGCGCTCTACTGGACCATTACTGACACTCAGAGGCGAAAGCT	Post-Bloom	0.335484	1.00787e-07		Cyanobacteria_154			Bacteria	Cyanobacteria	Cyanobacteria/Melainabacteria group		Chroococcales					Chroococcales						Post-Bloom	Chlorophyll-a	0.289707	0.000567791			Post-Bloom	Chl-a	0.348673	1.64072e-07
CGTTATCCGGAATCATTGGGCGTAAAGCGTCCGCAGGTGGTTTTCAAAGTCTGCTGTTAAAGACTGGAGCTCAACTCCGGAACGGCGGTGGAAACTTGGAAACTAGAGTTCGGTAGGGGTAGCAGGAATTCCCAGTGTAGCGGTGAAATGCGTAGATATTGGGAAGAACATCGGTGGCGAAGGCGTGCTACTGGACCGCAACTGACACTCAGGGACGAAAGCT	Post-Bloom	0.32965	1.72192e-07		Cyanobacteria_181			Bacteria	Cyanobacteria	Cyanobacteria/Melainabacteria group		Chroococcales	Aphanothecaceae	Candidatus Atelocyanobacterium	Candidatus Atelocyanobacterium thalassa		Candidatus Atelocyanobacterium thalassa						Post-Bloom	NA	NA	NA			Post-Bloom	Chl-a	0.151606	0.026579
CGTTATCCGGAATCATTGGGCGTAAAGCGCCTGTAGGTTGTTTAATAAGTCCGTTGTTAAAGACTAGGGCTCAACCCTAGAGCAGCAATGGAAACTACTAGACTAGAGTATGGCAGGGGTAGAGGGAATTTCTAGTGTAGCGGTGAAATGCGTAGATATTAGAAAGAACACCAGTGGCGAAAGCGCTCTACTGGACCATTACTGACACTCAGAGGCGAAAGCT	Post-Bloom	0.314704	6.45909e-07		Cyanobacteria_210			Bacteria	Cyanobacteria	Cyanobacteria/Melainabacteria group		Synechococcales	Acaryochloridaceae	Acaryochloris	Acaryochloris marina	Acaryochloris marina MBIC11017	Acaryochloris marina MBIC11017						Post-Bloom	Spring	0.181445	0.0331867			Post-Bloom	Chl-a	0.183422	0.00713692
GGTTATTCATGATGATTGGGTGTAAAGCAGGATAAGGTGATAAGTACAAGTTTCAAGTCGACCAAGAGCTTAACTCAAGGGAGGATTTGAAAAACTAACTTAATAGAGGAATTACAGAGTTGAAAGCGGAACTATTGGGGTAGAGGTGTAATTCGTTTCATCTCAATGGGAACACCGAAAGCGAAAAGCAGCCAACTAATAATTACCTGCCACTAGACCTGGAATCT	Post-Bloom	0.306574	1.28722e-06		Proteobacteria_3590			Bacteria	Proteobacteria		Betaproteobacteria			Candidatus Nasuia	Candidatus Nasuia deltocephalinicola		Candidatus Nasuia deltocephalinicola						Post-Bloom	Fall/Winter	0.33485	5.96e-05			Post-Bloom	Fall/Winter2019	0.197809	0.00366655
CGTTGTCCGGAATTATTGGGCGTAAAGAGCTCGTAGGCGGTTTGTCACGTCTGCTGTGAAAATCCAAGGCTCAACCTTGGACTTGCAGTGGGTACGGGCAGGCTAGAGTGCGGTAGGGGAGATGGGAATTCCTGGTGTAGCGGTGGAATGCGCAGATATCAGGAGGAACACCAATGGCGAAGGCACATCTCTGGGCCGTAACTGACGCTGAGGAGCGAAAGCA	Post-Bloom	0.305694	1.38527e-06		Actinobacteria_1933			Bacteria	Actinobacteria	Terrabacteria group	Actinobacteria	Micrococcales	Microbacteriaceae	Candidatus Aquiluna	Candidatus Aquiluna sp. 15G-AUS-rot		Candidatus Aquiluna sp. 15G-AUS-rot						Post-Bloom	Other	0.204744	0.016001			Post-Bloom	NA	NA	NA
CGTTATCCGGAATTATTGGGCGTAAAGTGTTTGTAGGCGGTATTTGTTGTTATATATCAAATCCTAGGTTTGTTGCTTAGGTCTATATATAATACTCTTTTACTTGAGTCGGGCAGGGGACAATAGAATTTCATACATAGGAGTGAAATCCAACCATTTATGAAGGAATGCCATTAGCGAAAGCGATTGTCTGGGCCTGTTACTGACGCTGAGAAACGAAAGCA	Post-Bloom	0.30569	1.38573e-06		Proteobacteria_3590			Bacteria	Proteobacteria		Betaproteobacteria			Candidatus Nasuia	Candidatus Nasuia deltocephalinicola		Candidatus Nasuia deltocephalinicola						Post-Bloom	NA	NA	NA			Post-Bloom	Summer	0.143484	0.0359438
CGTTATCCGGCATGATTGGGCGTAAAGGGTTCGTAGACGGTAAAGTAAGTTTTTTGTTAAAGTTTAAGACTCAATCTTAATTCGGCAATCAATACTTCTTTACTTTGAGTTTGATATGGAAAAGTAGAATTTTATATGTAGAGGTGAAATTCGTAGATATATAAAGGAATGCCTATAGCGAAGGCAACTTTTTGATACAACACTGACGTTAAGGGACGAAAGTG	Post-Bloom	0.303272	1.69327e-06		Proteobacteria_3590			Bacteria	Proteobacteria		Betaproteobacteria			Candidatus Nasuia	Candidatus Nasuia deltocephalinicola		Candidatus Nasuia deltocephalinicola						Post-Bloom	NA	NA	NA			Post-Bloom	NA	NA	NA
CGTTATCCGGAATCATTGGGCGTAAAGCGTCTGTAGGTTGTTCAGAAAGTCTAGTGTTAAAGACTAGAGCTTAACTCTGGAAAAGCATTAGAAACTACTGAACTCGAGTATGGTAGAGGTATAGGGAATTCCTTGTGTAGCGGTGAAATGCGTAGATATAAGGAAGAACACCGGTTGCGAAAGCGCTATACTGGGCCATTACTGACACTCAGAGACGAGAGCT	Post-Bloom	0.294689	3.40024e-06		Cyanobacteria_135			Bacteria	Cyanobacteria	Cyanobacteria/Melainabacteria group													Post-Bloom	NA	NA	NA			Post-Bloom	Winter/Spring	0.160753	0.0186146
TGTTATCCGGAATCACTGGGCGTAAAGCGTCTGTAGGTGGTTTAATAAGTCAACTGTTAAATCTTGAAGCTCAACTTCAAAATCGCAGTCGAAACTATTAGACTAGAGTATAGTAGGGGTAAAGGGAATTTCCAGTGGAGCGGTGAAATGCGTAGAGATTGGAAAGAACACCGATGGCGAAGGCACTTTACTGGGCTATTACTGACACTCAGAGACGAAAGCT	Post-Bloom	0.2946	3.42465e-06		Cyanobacteria_151			Bacteria	Cyanobacteria	Cyanobacteria/Melainabacteria group		Chroococcales	Chroococcaceae	Geminocystis	Geminocystis sp. NIES-3709		Geminocystis sp. NIES-3709						Post-Bloom	Fall/Winter	0.3053	0.000271402			Post-Bloom	Fall/Winter2019	0.290784	1.54154e-05
TGTTATCCGGAATCACTGGGCGTAAAGCGTCTGTAGGTGGTTTAATAAGTCAACTGTTAAATCTTGAAGCTCAACTTCAAAATCGCAGTCGAAACTATTAGACTAGAGTATAGTAGGGGTAAAGGGAATTTCCAGTGGAGCGGTGAAATGCGTAGAGATTGGAAAGAACACCGATGGCGAAGGCACTTTACTGGGCTATTACTAACACTGAGAGACGAAAGCT	Post-Bloom	0.292741	3.97102e-06		Cyanobacteria_151			Bacteria	Cyanobacteria	Cyanobacteria/Melainabacteria group		Chroococcales	Chroococcaceae	Geminocystis	Geminocystis sp. NIES-3709		Geminocystis sp. NIES-3709						Post-Bloom	Fall/Winter	0.343924	3.63e-05			Post-Bloom	Fall/Winter2019	0.32327	1.35377e-06
TGTTATCCGGAATCACTGGGCGTAAAGCGTCTGTAGGTGGTTTAATAAGTCGAATGTTAAATCTTGAAGCTTAACTTCGAAATCGCATTCGAAACTATTAGACTTGAGTATAGTAGAGGTAAAGGGAATTTCCAGTGGAGCGGTGAAATGCGTAGATATTGGAAAGAACACCGATGGCGAAGGCACTTTACTGGGCTATTACTGACACTCAGAGACGAAAGCT	Post-Bloom	0.277078	1.32681e-05		Cyanobacteria_148			Bacteria	Cyanobacteria	Cyanobacteria/Melainabacteria group		Synechococcales					Synechococcales						Post-Bloom	Spring	0.254071	0.00263822			Post-Bloom	Chl-a	0.229283	0.000725901
CGTTATCTGGAATAATTGGGCGTAAAGGGTTCGTAGACTGTATTGTAAGTTATTTGTTAAATCCTAGAGCTTAACTCTAGAAAAGCATTTAATACTACTATACTAGAGTTTTGTGCAGAAGAGTAGAATTTCATGTCGAGGAGTAACGACTGCAGACACATGAAGGAATATCAGTAGCGAAGGCGACTCTTTGGCAAAAACTGACGTTGAGGGACGAAAGTG	Post-Bloom	0.276103	1.42683e-05		Firmicutes_Tenericutes_3723			Bacteria	Firmicutes	Terrabacteria group	Tissierellia	Tissierellales	Peptoniphilaceae	Anaerococcus			Anaerococcus						Post-Bloom	Spring	0.324471	0.00010335			Post-Bloom	NA	NA	NA
CGTTATCCGGAATCATTGGGCGTAAAGCGCCTGTAGGTTGTTTAATAAGTCTGTTGTTAAAGACTAGGGCTCAACCCTAGAAAAGCAATGGAAACTACTAGACTAGAGTATGGCAGGGGTAGAGGGAATTTCTAGTGTAGCGGTGAAATGCGTAGATATTAGAAAGAACACCAGTGGCGAAAGCGCTCTACTGGACCATTACTGACACTCAGAGGCGAAAGCT	Post-Bloom	0.270195	2.20379e-05		Cyanobacteria_154			Bacteria	Cyanobacteria	Cyanobacteria/Melainabacteria group		Chroococcales					Chroococcales						Post-Bloom	Winter/Spring	0.392873	1.88e-06			Post-Bloom	NA	NA	NA
TGTTATCCGGATTCACTGGGCGTAAAGCGTCTGCAGGTTGTTTAGCAAGTCGATTGTTAAAGCTTGGGGCTTAACCCCAAAACAGCAATGGAAACTGCTAGACTTGAGTATGGTAGAGGTAAAAGGAATTTCCAGTGGAGTGGTGAAATGCGTAGATATTGGAAAGAACACCGAAGGCGAAGGCATTTTACTGGGCCATTACTGACACTCAGAGACGAAAGCT	Post-Bloom	0.269014	2.40095e-05		Cyanobacteria_148			Bacteria	Cyanobacteria	Cyanobacteria/Melainabacteria group		Synechococcales					Synechococcales						Post-Bloom	Spring	0.453652	2.3e-08			Post-Bloom	Chl-a	0.374799	1.52851e-08
TGTTATCCGGAATTATTGGGCGTAAAGCGTCTGCAGGTGGATAGTTAAGTCTTATGTCAAATTTCTAGGCTCAACCTGGAGTCGGCAAAAGAAACTGGTTATCTCGAGTATGGTAGAGGTAAAGGGAATTTCAAGTGGAGCGGTGAAATGCGTAGATATTTGAAAGAACTCCAATAGCGAAGGCACTTTACTGGGCCATTACTGACACTCAGAGACGAAAGCT	Post-Bloom	0.267493	2.67958e-05		Cyanobacteria_209			Bacteria	Cyanobacteria	Cyanobacteria/Melainabacteria group		Synechococcales	Prochlorotrichaceae	Halomicronema	Halomicronema hongdechloris	Halomicronema hongdechloris C2206	Halomicronema hongdechloris C2206						Post-Bloom	NA	NA	NA			Post-Bloom	NA	NA	NA
CGTTATCCGGAATTATTGGGCGTAAAGGGTTCGTAGGTGGCATAATAAGTCTATAGTTAAAGTTCGGGGCTCAACCCCGTGATGCTATAGAAACTGTTAAGCTCGAATATAGGAGAGGATAATGGAATTCCATGTGTAGCGGTAAAATGCGTAAATATATGGAGGAACACCAGTGGCGAAAGCGATTATCTGGACTAAGATTGACACTAAGGAACGAAAGCG	Post-Bloom	0.262144	3.9214e-05		Firmicutes_Tenericutes_489			Bacteria	Firmicutes	Terrabacteria group	Erysipelotrichia	Erysipelotrichales	Erysipelotrichaceae	Erysipelothrix			Erysipelothrix						Post-Bloom	NA	NA	NA			Post-Bloom	Fall/Winter2019	0.419638	1.54622e-10
TGTTATCCGGAATCACTGGGCGTAAAGCGTCTGCAGGTGGTTTTTTAAGTCTGATGTTAAAACTCGAGGCTCAACCTCGATCCAGCATTGGAAACTGAAAGACTTGAGTATAGTAGGGATAGAGGGAATTTCCAGTGGAGCGGTGAAATGCGTAGATATTGGAAAGAACACCGATGGCGAAAGCACTCTATTGGGCTATTACTGACACTCAGAGACGAAAGCT	Post-Bloom	0.261245	4.17752e-05		Cyanobacteria_148			Bacteria	Cyanobacteria	Cyanobacteria/Melainabacteria group		Synechococcales					Synechococcales						Post-Bloom	NA	NA	NA			Post-Bloom	Fall/Winter	0.155291	0.0230735
TGTTTTTCTAAATAATTGGGCGTAAAGGGTCTGTAGGCGGAAGTGCAAGTTGAAACCTAAAAGTTAGAACTTAATTCTAAACCGAGTTTCAAAACTACATTTCTTGAGTATGAGAGGGGATAATAGAATTTCTAGTGGAGGAATAGAATTCGTAGATATTAGAAGGAATACCAGAGGCGAAGGCGATTATCTGGCTCAATACTGACGCTGAGAGACGAAAGCA	Post-Bloom	0.252145	7.82057e-05		Proteobacteria_6887			Bacteria	Proteobacteria		Gammaproteobacteria	Oceanospirillales	Halomonadaceae	Candidatus Carsonella	Candidatus Carsonella ruddii		Candidatus Carsonella ruddii						Post-Bloom	Fall/Winter	0.178398	0.0363082			Post-Bloom	NA	NA	NA
CGTTATCCGGATTTACTGGGTTTAAAGGGTGCGTAGGCGGTCTATTATGTCAGTGGTGAAAGCCCGGGGCTCAACTCCGGAACTGCCATTGAAACTGATAGACTTGAGTTTGGGAGAGGTAGGCGGAATACAGCATGTAGCGGTGAAATGCATAGATATGCTGTAGAACACCAATTGCGAAGGCAGCTTACTATACCAATACTGACGTTCAGGCACGAAAGCG	Post-Bloom	0.250864	8.52645e-05		Bacteroidetes_273			Bacteria	Bacteroidetes	FCB group							FCB group						Post-Bloom	Chlorophyll-a	0.483747	1.85e-09			Post-Bloom	Chl-a	0.368431	2.78004e-08
TGTTATTCTAAATAACTGGGCGTAAAGGGTTCGTAGGTTGGTAATTAAGTTGAAAAGGAAATCTCAGGGCTTAACCTTGAAAGTTGTTTCAATACTGATTATCTTGAGTTTGGGAGAGGATAGTAGAATTTCTAGTGTAGGAATAAAATCCAAAGATATTAGAAGGAATACCAGGAGCGAAGGCGACTATCTGGAACAATACTGACACTAAGGAACGAAAGCA	Post-Bloom	0.247053	0.000109975		Proteobacteria_5202			Bacteria	Proteobacteria		Alphaproteobacteria	Rickettsiales	Anaplasmataceae				Anaplasmataceae						Post-Bloom	NA	NA	NA			Post-Bloom	NA	NA	NA
CGTTATCCGGAATCATTGGGTTTAAAGGGTCCGTAGGTGGATAATTAAGTCAGAGGTGAAATCCTGCAGCTCAACTGTAGAATTGCCTTTGATACTGGTTGTCTTGAGTTATTATGAAGTGGTTAGAATATGTAGTGTAGCGGTGAAATGCATAGATATTACATAGAATACCAATTGCGAAGGCAGATCACTAATAATATACTGACACTGATGGACGAAAGCG	Post-Bloom	0.246117	0.000116992		Bacteroidetes_1027			Bacteria	Bacteroidetes	FCB group	Flavobacteriia	Flavobacteriales	Flavobacteriaceae				Flavobacteriaceae						Post-Bloom	NA	NA	NA			Post-Bloom	NA	NA	NA
CGTTAATCGGAATTACTGGGCGTAAAGCGCGCGTAGGTGGTTTGTTAAGTTGGATGTGAAAGCCCTGGGCTCAACCTAGGAACTGCATCCAAAACTAACTCACTAGAGTACGATAGAGGGAGGTAGAATTCATAGTGTAGCGGTGGAATGCGTAGATATTATGAAGAATACCAGTGGCGAAGGCGGCCTCCTGGATCTGTACTGACACTGAGGTGCGAAAGCG	Post-Bloom	0.238067	0.000197243		Proteobacteria_3956			Bacteria	Proteobacteria		Gammaproteobacteria	Chromatiales	Thioalkalispiraceae	Sulfurivermis	Sulfurivermis fontis		Sulfurivermis fontis						Post-Bloom	Chlorophyll-a	0.377204	5.1e-06			Post-Bloom	NA	NA	NA
CGTTGTCCGGAATCATTGGGTGTAAAGGGTGCGTAGGCGGATGTTTAAGTCTGAGGTGAAATCTTGCCGCTTAACGGTAAAATGGCCTTGGATACTGGATGTCTTGAGTGCAGAAGAGGCAGGTGGAATTCGTAGTGTAGCGGTGAAATGCATAGATATTACGAAGAACATCAGTGGCGAAGGCGGCCTGCTGGTCTGCAACTGACGCTGAGGCACGAAAGCG	Post-Bloom	0.236004	0.000224852		phylum_reps_735																		Post-Bloom	Early-Summer	0.261921	0.00191409			Post-Bloom	Chl-a	0.193204	0.00456044
TGTTATCCGGATTCACTGGGCGTAAAGCGTCTGCAGGTTGTTTAGCAAGTCGATTGTTAAAGCTTGGGGCTTAACCCCAAAACAGCAATGGAAACTGCTAGACTTGAGTATGGTAGAGGTAAAAGGAATTTCCAGTGGAGCGGTGAAATGCGTAGATATTGGAAAGAACACCGATGGCGAAGGCATTTTACTGGGCCATAACTGACACTCAGAGACGAAAGCT	Post-Bloom	0.233315	0.000266275		Cyanobacteria_148			Bacteria	Cyanobacteria	Cyanobacteria/Melainabacteria group		Synechococcales					Synechococcales						Post-Bloom	Chlorophyll-a	0.236023	0.00532137			Post-Bloom	Chl-a	0.137038	0.0452404
CGTTATTCGGAATTATTGGGCGTAAAGTGTTCGTAGGTTGTAATTGATGTTATAGGTAAAAGTTTATGTTGATTGCATAAGTATACTTATAATACACTTTTTACTAGAGATAAATAGGGGATAACAGAACTTTATAATTAGGTGTAAAATCCAACGATTTATAAAAGAATGTCATAGGCGAAAGCGGTTATCTTGGTTTATTCTGACATTGAAGAACGAAAGCG	Post-Bloom	0.224101	0.000468359		Proteobacteria_3590			Bacteria	Proteobacteria		Betaproteobacteria			Candidatus Nasuia	Candidatus Nasuia deltocephalinicola		Candidatus Nasuia deltocephalinicola						Post-Bloom	Spring	0.27957	0.000897597			Post-Bloom	NA	NA	NA
CGTTGTTCGGAATTACTGGGCGTAAAGCGCACGTAGGCGGACTATTAAGTCAGAGGTGAAATCCCGGGGCTCAACCCCGGAACTGCCTTTGATACTGGTAGTCTAGAGTTCGAGAGAGGTGAGTGGAATTCCAAGTGTAGAGGTGAAATTCGTAGATATTTGGAGGAACACCAGTGGCGAAGGCGGCTCACTGGCTCGATACTGACGCTGAGGTGCGAAAGTG	Post-Bloom	0.221729	0.000539685		Proteobacteria_6059			Bacteria	Proteobacteria		Alphaproteobacteria	Rhodobacterales	Rhodobacteraceae	Celeribacter	Celeribacter indicus		Celeribacter indicus						Post-Bloom	Fall/Winter	0.327369	8.88e-05			Post-Bloom	Fall/Winter2019	0.473155	2.45022e-13
TGTTATCCGGAATTACTGGGCGTAAAGCGTCTGTAGGTGGTTTACTAAGTCTACAGTTAAATCTTGAAGCTTAACTTCAATCATGCTATAGAAACTGGTATACTTGAGTATAGTAGAGGTAGAAGGAATTTCCAGTGGAGCGGTGAAATGCGTAGATATTGGAAAGAACACCGATGGCGAAAGCATTCTACTGGGCTATTACTGACACTGAGAGACGAAAGCT	Post-Bloom	0.220568	0.000578145		Cyanobacteria_148			Bacteria	Cyanobacteria	Cyanobacteria/Melainabacteria group		Synechococcales					Synechococcales						Post-Bloom	NA	NA	NA			Post-Bloom	NA	NA	NA
TGTTATCCGGAATCACTGGGCGTAAAGCGTCTGTAGGTTGTTAGACAAGTCAACTGTTAAATCTTGGGGCTTAACTTCAAAATTGCAGTCGAAACTGTTTGACTAGAGTATAGTAGGGGTAAAGGGAATTTCCAGTGGAGCGGTGAAATGCGTAGATATTGGAAAGAACACCAATGGCGAAGGCACTTTACTGGGCTATTACTGACACTCAGAGACGAAAGCT	Post-Bloom	0.218047	0.000670539		Cyanobacteria_159			Bacteria	Cyanobacteria	Cyanobacteria/Melainabacteria group													Post-Bloom	NA	NA	NA			Post-Bloom	NA	NA	NA
TGTTATCCGGAATCACTGGGCGTAAAGCGTCTGTAGGTGGTTTAGTAAGTCAACTGTTAAATCTTGAAGCTTAACTTCAAAATCGCAGTCGAAACTATTAGACTAGAGTATAGTAGGGGTAAAGGGAATTTCCAGTGGAGCGGTGAAATGCGTAGAGATTGGAAAGAACACCGATGGCGAAGGCACTTTACTGGGCTATTACTAACACTCAGAGACGAAAGCT	Post-Bloom	0.214783	0.000810448		Cyanobacteria_151			Bacteria	Cyanobacteria	Cyanobacteria/Melainabacteria group		Chroococcales	Chroococcaceae	Geminocystis	Geminocystis sp. NIES-3709		Geminocystis sp. NIES-3709						Post-Bloom	Chlorophyll-a	0.21817	0.0101509			Post-Bloom	Winter/Spring	0.240687	0.000381302
CGTTATCCGGAATCATTGGGCGTAAAGCGTCTGTAGGTGGCTTGGTAAGTCGACTGTTAAATCGTAGAGCTCAACTCTATATCGGCAGTCGAAACTACTTCGCTTGAGTGTGGTAGGGGCAGAGGGAATTCCCGGTGTAGCGGTGAAATGCGTAGATATCGGGAAGAACACCAACGGCGAAAGCACTCTGCTGGGCCAACACTGACACTGAGAGACGAAAGCT	Post-Bloom	0.209906	0.00107017		Cyanobacteria_221			Bacteria	Cyanobacteria	Cyanobacteria/Melainabacteria group		Synechococcales	Synechococcaceae	Synechococcus	Synechococcus sp. Minos11		Synechococcus sp. Minos11						Post-Bloom	Spring	0.519193	6.83e-11			Post-Bloom	Summer	0.137512	0.0444938
TGTTATCCGGAATCACTGGGCGTAAAGCGTCTGTAGGTGGTTTAGTAAGTCTGTTGTTAAATCTTGAGGCTCAACTTCAAAATCGCAATCGAAACTACTAGACTTGAGTATGGTAAAGGTAAAAGGAATTTCCAGTGGAGCGGTGAAATGCGTAGATATTGGAAAGAACACCGATGGCGAAAGCATTTTACTGGGCCATTACTGACACTCAGAGACGAAAGCT	Post-Bloom	0.209857	0.00107316		Cyanobacteria_148			Bacteria	Cyanobacteria	Cyanobacteria/Melainabacteria group		Synechococcales					Synechococcales						Post-Bloom	Spring	0.297346	0.000397556			Post-Bloom	NA	NA	NA
CGTTGTTCGGAATCACTGGGCATAAAGAGTTCGTAGGCGGATATATCAGTTGGGTGTGAAATCCCGGGGCCTACCCCCGGAACTGCACTCAATACTGTATATCTGGAGTCCTTGAGGGGTAAGTGGAATTCCATGTGTAGCGGTGAAATGCGTAGATATATGGGAGAACGCCAATGGCGAAGGCAGCTTACTGGCGAGTGACTGACGCTGAGGAACGAAAGTT	Post-Bloom	0.206524	0.00129311		Spirochaetes_148			Bacteria	Spirochaetes		Spirochaetia						Spirochaetia						Post-Bloom	NA	NA	NA			Post-Bloom	NA	NA	NA
CGTTATCCGGAATAATTGGGCGTAAAGCGTCCGCAGGTGGTTTTGTAAGTCTGCTGTTAAAGCGTGAGGCTTAACCTCATAACGGCGGTGGAAACTACAAGACTTGAGTGCGTTCGGGGCAGAGGGAATTCCTGGTGTAGCGGTGAAATGCGTAGATATCAGGAAGAACACCGGTGGCGAAAGCGCTCTGCTAGGCCGTAACTAACACTGAGGGACGAAAGCT	Post-Bloom	0.203444	0.00153234		Cyanobacteria_56			Bacteria	Cyanobacteria	Cyanobacteria/Melainabacteria group		Nostocales					Nostocales						Post-Bloom	NA	NA	NA			Post-Bloom	NA	NA	NA
CGTTATTCGGCATGATTGGGCGTAAAGGGTTCGTAGACTGTAAAGCAAGTTTTTTGTTAAATTTTAAGACTCAATCTTAATACAGCATTTAATACTTCTTTACTTTGAGTTTAATATAGAAAAGTAGAACTTCATATGTAGAGGTGAAATTCGTAGATATGTGAAAGAATGCCAATAGCGAAGGCAACTTTTTGATATAACACTGACGTTGAGGGACGAAAATA	Post-Bloom	0.201145	0.00173666		Proteobacteria_3590			Bacteria	Proteobacteria		Betaproteobacteria			Candidatus Nasuia	Candidatus Nasuia deltocephalinicola		Candidatus Nasuia deltocephalinicola						Post-Bloom	NA	NA	NA			Post-Bloom	NA	NA	NA
CGTTACTCGGAATTATTGGGCGTAAAGCGTGCGTAGGCGGGTTTACAAGTTGCAAGTGAAAGCCTTTGGCTCAACCAAAGAATTGCTTGCAAAACTGTAAATCTTGAGTTCTAGAGAGGACAGAGGAATTCCTGGTGTAGGGGTGAAATCCGTAGATATCAGGAGGAAGGTCAAATGCGAAGGCATCTGTCTGGATAGGTACTGACGCTGAGGTACGAAAGCG	Post-Bloom	0.197273	0.00213758		Proteobacteria_4408			Bacteria	Proteobacteria		Epsilonproteobacteria	Nautiliales	Nautiliaceae	Nautilia	Nautilia profundicola	Nautilia profundicola AmH	Nautilia profundicola AmH						Post-Bloom	Spring	0.242249	0.00420098			Post-Bloom	Chl-a	0.170847	0.0123122
CGTTATTCAAAATGATTGGGCATAAAGTGTTTGTAGGCTGTATGTTTTGTCATTTGTTAAATATTTGATTTTTAATTGAAAAATGCTTATGATACTTGCATTACTATGAGTGAAATAAAGGGTAGCAGAATTTTGAAAGGAAAAGTAAAATTTAATGATTTTCAAAGGAATGTCAATAGCGAAAGCAGCTATCTTTATTTTTTACTGACGCTGAGAAACGAAAGCA	Post-Bloom	0.197118	0.00215525		Proteobacteria_3590			Bacteria	Proteobacteria		Betaproteobacteria			Candidatus Nasuia	Candidatus Nasuia deltocephalinicola		Candidatus Nasuia deltocephalinicola						Post-Bloom	Spring	0.175898	0.0390504			Post-Bloom	NA	NA	NA
TGTTATTCGGAGTGATTAGGCGTAAAGGGTCCTTTAAGCGGAATAATAAGTTGGACAGCGAAGAAAAGAGCTCAACTCTTTTTGTTATCCAATACTGTTATTCTTGAGTTTATCAGAGTTTAGTAGAACCTACGGAGTAGGGATAAAATCCGTTAATATCGTAGGGAACACCAGTGGCGAAGGCGACTATTCATGATAAGACTGACGCTGTAAGACGAAGGCG	Post-Bloom	0.196183	0.00226487		Spirochaetes_146			Bacteria	Spirochaetes		Spirochaetia	Spirochaetales					Spirochaetales						Post-Bloom	Fall/Winter	0.170986	0.0449464			Post-Bloom	Fall/Winter2019	0.141721	0.0383092
CGTTATTCGGAATTACTGGGCGTAAAGGGTTCGTAGACTGTATAGTAAGTTATTAGTTAAATCTTAAAAAAATACTTTAAACAAGCTAATAATACTGTTATACTAGAGTTTTAATTAGAAGAATAGAATTTCATATGAAGAGGTAAAATTCGTAGATATATGAAGGAATATCATAAGTGAAAACGATTCTTTATTAAAAACTGACGTTGAGGAACGAAAGCA	Post-Bloom	0.193744	0.00257482		Proteobacteria_6887			Bacteria	Proteobacteria		Gammaproteobacteria	Oceanospirillales	Halomonadaceae	Candidatus Carsonella	Candidatus Carsonella ruddii		Candidatus Carsonella ruddii						Post-Bloom	Early-Summer	0.252023	0.00286407			Post-Bloom	Summer	0.158523	0.0203354
CGTTATCCGGAATCATTGGGCGTAAAGCGTCTGTAGGTGGCTTGGTAAGTCTACTGTTAAAGAGTTCAGCTTAACTGGATATAGGCAGTAGAAACTACTAAGCTTGAGTGTGGTAGGGGCAGAGGGAATTCCCGGTGTAGCGGTGAAATGCGTAGAGATCGGGAAGAACACCAACGGCGAAAGCACTCTGCTGGGCCAACACTGACACTGAGAGACGAAAGCT	Post-Bloom	0.192362	0.00276707		Cyanobacteria_221			Bacteria	Cyanobacteria	Cyanobacteria/Melainabacteria group		Synechococcales	Synechococcaceae	Synechococcus	Synechococcus sp. Minos11		Synechococcus sp. Minos11						Post-Bloom	Winter/Spring	0.228858	0.00693505			Post-Bloom	Winter/Spring	0.161691	0.0179293
CGTTATCCGGAATGATTGGGCGTAAAGCGTCTGTAGGTGGTTTTTTAAGTCTATGGTTAAAGCGTAGGGCTCAACCCTATTATGGCCATAGAAACTAAGAAACTTGAGCGTAGCAGGAGTAGAGGGAATTACCAGTGTAACGGTGAAATGTGTAGATATTGGTAAGAACACCAACGGCGAAGGCACTCTACTGGACTATAACTAGGAATTTATTCGTAGCTAAGCTGACACTCAGAGACGAAACCT	Post-Bloom	0.181649	0.00475885		Cyanobacteria_43			Bacteria	Cyanobacteria	Cyanobacteria/Melainabacteria group							Cyanobacteria/Melainabacteria group						Post-Bloom	NA	NA	NA			Post-Bloom	NA	NA	NA
CGTTATCCGGAATCATTGGGCGTAAAGCGCCTGTAGGTGGTTTAATAAGTCTGTTGTTAAAGACTAGGGCTTAACCCTAGAGCAGCAATGGAAACTAGTAAACTTGAGTATGGCAGGGGTAGAGGGAATTTCTAGTGTAGCGGTGAAATGCGTAGATATTAGAAAGAACACCAGTGGCGAAAGCGCTCTACTGGGCCATTTCTGACACTCAGAGGCGAAAGCT	Post-Bloom	0.177242	0.00589932		Cyanobacteria_154			Bacteria	Cyanobacteria	Cyanobacteria/Melainabacteria group		Chroococcales					Chroococcales						Post-Bloom	Chlorophyll-a	0.254487	0.00259445			Post-Bloom	NA	NA	NA
GGTTCTGGATGATGATTGGGTGTAAAGCAGGATAAGGTGGTAAGTACAAGTTTGACGTCGACTGACCGAAAGGAAAGGAGGATTTCAAAAACTAACTTACTTGAGGGATCTCTAAGTTGAAAGCGGAACTCTATGGGGAGCGGTGTAATGCATTTCATCTATAGAGGAACACCGAAGACGATAAGTAGCCAACTAAAGATACCCTGCCACTAGACCTGAAACCT	Post-Bloom	0.1715	0.00775043		Proteobacteria_3590			Bacteria	Proteobacteria		Betaproteobacteria			Candidatus Nasuia	Candidatus Nasuia deltocephalinicola		Candidatus Nasuia deltocephalinicola						Post-Bloom	NA	NA	NA			Post-Bloom	NA	NA	NA
CGTTAATCGGAATTACTGGGCGTAAAGCGCATGCAGGTGGTTTGTTAAGCAAGATGTGAAAGCCCGGGGCTCAACCTCGGAACAGCATTTTGAACTGGCAGACTAGAGTACTGTAGAGGGGGGTAGAATTTCAGGTGTAGCGGTGAAATGCGTAGAGATCTGAAGGAATACCGGTGGCGAAGGCGGCCCCCTGGACAGATACTGACACTCAGATGCGAAAGCG	Post-Bloom	0.169878	0.00835944		Proteobacteria_1021			Bacteria	Proteobacteria		Gammaproteobacteria	Vibrionales	Vibrionaceae	Vibrio	Vibrio astriarenae		Vibrio astriarenae						Post-Bloom	NA	NA	NA			Post-Bloom	NA	NA	NA
TGTTATCCGGAATCACTGGGCGTAAAGCGTCTGTAGGTGGTTAAGCAAGTCAACTGTTAAATCTTGAGGCTCAACTTCAAAATCGCAGTCGAAACTGTTTGACTAGAGTATAGTAGGGGTAAAGGGAATTTCCAGTGGAGCGGTGAAATGCGTAGATATTGGAAAGAACACCAATGGCGAAGGCACTTTACTGGGCTATTACTGACACTCAGAGACGAAAGCT	Post-Bloom	0.167023	0.00953566		Cyanobacteria_155			Bacteria	Cyanobacteria	Cyanobacteria/Melainabacteria group		Chroococcales					Chroococcales						Post-Bloom	NA	NA	NA			Post-Bloom	NA	NA	NA
TGTTATCCGGAATCACTGGGCGTAAAGCGTCTGTAGGTTGTTAGACAAGTCAACTGTTAAATCTTGGGGCTTAACTTCAAAATTGCAGTCGAAACTGTTTGACTAGAGTATAGTAGGGGTAAAGGGAATTTCCAGTGGAGCGGTGAAATGCGTAGATATTGGAAAGAACACCGATGGCGAAGGCACTTTACTGGGCTATTACTGACACTCAGAGACGAAAGCT	Post-Bloom	0.160622	0.0127185		Cyanobacteria_160			Bacteria	Cyanobacteria	Cyanobacteria/Melainabacteria group													Post-Bloom	NA	NA	NA			Post-Bloom	NA	NA	NA
CGTTATCCGACATGACTGGGCGTAAAGAGTTCGTAGACGGTATAATAAGTTAGATGTTAAATTTTAAAGCTTAACTTTACAAAAAGCATTTAATACTGTTATACTTTGAGTTTTATACAGAAGATTATAATTTTATTTGTAAGAGTAGAATCTTATTATAAATAAAGGAATGCCAGCGGCGAAGGCGTGTCTTTAGTAAAAACTGACGTTGAGGGACGAAAGTT	Post-Bloom	0.159836	0.013168		Proteobacteria_4980			Bacteria	Proteobacteria		Gammaproteobacteria	Alteromonadales	Alteromonadaceae	Glaciecola	Glaciecola amylolytica		Glaciecola amylolytica						Post-Bloom	Early-Summer	0.181572	0.0330616			Post-Bloom	Summer	0.18611	0.00632372
TGTTATTCGGAATGATTGGGCGTAAAGGGGGCGTAGGCGGTTACTTGCAGTTGTTTGTGAAAATCATGCCTGCAAGGCATGAAGTGCATCCAAAACGATGTAGCTTGAGTTTGAAAGAGGAAAGTGGAATTTCTAGTGGAGAGGTTAAATTCTTAGATATTAGAAGGAACACCTAAAGCGAAGGCAGCTTTCTGGTTCATGACTGACGCTGAGGCCCGAAAGCT	Post-Bloom	0.156749	0.0150693		Spirochaetes_148			Bacteria	Spirochaetes		Spirochaetia						Spirochaetia						Post-Bloom	Chlorophyll-a	0.175276	0.0397593			Post-Bloom	Summer	0.176971	0.00948084
CGTTATCCGGAATTATTGGGCGTAAAGCGTCTGTAGGTGGTTTAGTCAGTCTACTGTTAAAGAGTACAGCTTAACTGTATATAGGCAGTGGAAACTACTAGGCTTGAGTGTGGTAGGGGCAGAGGGAATTCCCGGTGTAGCGGTGAAATGCGTAGATATCGGGAAGAACACCAACGGCGAAAGCACTCTGCTGGGCCAACACTGACACTGAGAGACGAAAGCT	Post-Bloom	0.155271	0.0160616		Cyanobacteria_221			Bacteria	Cyanobacteria	Cyanobacteria/Melainabacteria group		Synechococcales	Synechococcaceae	Synechococcus	Synechococcus sp. Minos11		Synechococcus sp. Minos11						Post-Bloom	NA	NA	NA			Post-Bloom	NA	NA	NA
TGTTATCCGGAATCACTGGGCGTAAAGCGTTTGTAGGTGGTTATTTAAGTCAACTGTTAAATCTGGAGGCTCAACTTCCAAATCGCAGTCGAAACTATTTAACTAGAGTATAGTGGAGGTAAAGGGAATTTCCAGTGGAGCGGTGAAATGCGTAGATATTGGAAAGAACACCGATAGCGAAGGCACTTTACTGGGCTATCACTGACACTCAGAGACGAAAGCT	Post-Bloom	0.153063	0.0176509		phylum_reps_2497																		Post-Bloom	Chlorophyll-a	0.238583	0.00483186			Post-Bloom	NA	NA	NA
CGTTAATCGGAATTACTGGGCGTAAAGCGCGCGTAGGCGGCTAAGTCAGTCAGAAGTGAAAGCCCCGGGCTCAACCTGGGAATTGCTTTTGATACTGCTTAGCTAGAGTTTGGTAGAGGATAGTGGAATTCCAGGTGTAGCGGTGAAATGCGTAGATATCTGGAGGAACATCAGTGGCGAAGGCGACTGTCTGGACCAAAACTGACGCTGAGGTGCGAAAGCG	Post-Bloom	0.14772	0.022074		Proteobacteria_4250			Bacteria	Proteobacteria		Gammaproteobacteria	Chromatiales	Ectothiorhodospiraceae	Acidihalobacter	Acidihalobacter prosperus		Acidihalobacter prosperus						Post-Bloom	NA	NA	NA			Post-Bloom	NA	NA	NA
TCTTATTCGGAATGACTGGGCGTAAAGGGTCTGTAGGCGGTTCATCAAGTGAAGGGCAAAAGCTTAGGGCCCAACCCTAAAGCCGAACCTTCAAACTCATGAACTGGAGTTCGAAAGGGGATAGTGGAATGTCTAGGGGAGGGCTAAAATCCGTAGATCTTAGACGGAAGACCAGGGGCGAAGGCGACTATCTGGGTCGAGACTGACGCTGAGAGACGAAAGCA	EarlySummer	0.79616	7.65105e-54		Proteobacteria_5209			Bacteria	Proteobacteria		Alphaproteobacteria	Rickettsiales	Anaplasmataceae	Neorickettsia			Neorickettsia						Early-Summer	Early-Summer	0.700069	1.25e-21			Early-Summer	Summer	0.723015	6.67155e-36
TGTTATCCGGAATTATTGGGCGTAAAGAGTCTGTAGGTGGCTTTGCAAGTCTAATGTTAAATATTAAAGCTCAACTTTAAGCCTGCGTTGGAAACTGCAAAGCTGGAGTAGAGTCGAAGTAGAAGGAATTTCCAGTGAAGCGGTGAAATGCGTAGATATTGGAAGGAACACCGATGGCGAAAGCATTCTACTAGGCTTTTACTGACACTAAGAGACGAAAGCT	EarlySummer	0.785577	1.5844e-51		Cyanobacteria_160			Bacteria	Cyanobacteria	Cyanobacteria/Melainabacteria group													Early-Summer	Early-Summer	0.671258	2.07e-19			Early-Summer	Summer	0.529324	7.49856e-17
TGTTATTCGGAATAATTGGGCGTAAAGGGCGTGTAGGCTGTTGTTTGCTGTTGTTTGTGAAAATCCAAAGCTCACCTTTGGCTGTGCATCCAAAACGAAACAACTTGAGTGTAAGAGGGGAAAATAGAATTTCTAGTGGAGAGGTTAAATTCTTAGAGATTAGAAGGAATACCAAAAGCGAAGGCAATTTTCTGGCTTACTACTGACGCTGAGGCGCGAAAGCG	EarlySummer	0.780496	1.84362e-50		Proteobacteria_6887			Bacteria	Proteobacteria		Gammaproteobacteria	Oceanospirillales	Halomonadaceae	Candidatus Carsonella	Candidatus Carsonella ruddii		Candidatus Carsonella ruddii						Early-Summer	Early-Summer	0.743816	1.46e-25			Early-Summer	Summer	0.621769	2.77031e-24
CGTTATTCGGAATTATTGGGCGTAAAGGGCTCGCAGGCTGCTTGAACAGTTAGACGTGAAATCCCCGGGCTTAACCTGGGAACTGCGTTTAATACTAGCAAGCTAGAGAAATAGAGAGGAAAGTGGAACTCCCAGTGTAGAGGTGAAATTCGTAGATATTGGGAAGAACACCAGTGGCGAAAGCGACTTTCTGGCTATTTTCTGACGCTGAGGAGCGAAAGCG	EarlySummer	0.764714	2.52727e-47		Proteobacteria_6567			Bacteria	Proteobacteria								Proteobacteria						Early-Summer	Early-Summer	0.693011	4.61e-21			Early-Summer	Summer	0.739545	2.63932e-38
CGTTGTTCGGAATTACTGGGCGTAAAGGGCGTGTAGGCGGTTTGTTAAGTTAGGCGTGAAAGCCCCGGGCTCAACCTGGGATGTGCGCTTAAAACTGGCAGACTTGAGACCGGGAGAGGGTAGTGGAATTTCCAGTGTAGAGGTGAAATTCGTAGATATTGGAAAGAACACCAGTGGCGAAGGCGGCTACCTGGCCCGGATCTGACGCTGAGGCGCGAAAGCG	EarlySummer	0.735121	4.6583e-42		Proteobacteria_6566			Bacteria	Proteobacteria	SAR116 cluster	Alphaproteobacteria			Candidatus Puniceispirillum	Candidatus Puniceispirillum marinum	Candidatus Puniceispirillum marinum IMCC1322	Candidatus Puniceispirillum marinum IMCC1322						Early-Summer	Early-Summer	0.787299	2.37e-30			Early-Summer	Summer	0.844123	2.62794e-59
CGTTATCCGGAATTATTGGGCGTAAAGCGTCTGTAGGTTGTTTGAAAAGTCCGGTGTCAAAGACCAGAGCTTAACTCTGGGCCGGCATTGGAAACTCTCAAACTAGAGCACGGTAGAGGTATGGGGAACTCCTTGTGTAGCGGTGAAATGCGTAGATATAAGGAAGAACACCGGTTGCGAAAGCGCCATACTGGGCCGTAGCTGACACTCAGAGACGAAAGCT	EarlySummer	0.733974	7.21017e-42		Cyanobacteria_160			Bacteria	Cyanobacteria	Cyanobacteria/Melainabacteria group													Early-Summer	Early-Summer	0.532364	1.82e-11			Early-Summer	Summer	0.61952	4.499e-24
CGTTAATCGGAATTACTGGGCGTAAAGAGTACGTAGGCGGCTTTACAAGTCGGGTGTGAAAGCCCTGAGCTTAACTCAGGAACTGCATTCGATACTGTATCGCTAGAGTTTATTAGAGGATAGCGGAATTCCAGGTGTAGCGGTGAAATGCGTAGATATCTGGAGGAACACCAATGGCGAAGGCAGCTATCTGGGATACAACTGACGCTGAGGTACGAAAGCG	EarlySummer	0.708379	7.11388e-38		Proteobacteria_2698			Bacteria	Proteobacteria		Gammaproteobacteria	Chromatiales	Wenzhouxiangellaceae	Wenzhouxiangella	Wenzhouxiangella sp. AB-CW3		Wenzhouxiangella sp. AB-CW3						Early-Summer	Spring	0.54619	4.24e-12			Early-Summer	Summer	0.488065	3.29752e-14
TGTTATCCGGAATCACTGGGCGTAAAGCGTCTGTAGGTGGTTTAGTATGTCTGTTGTTAAAGCTTAAGGCTTAACCTTAAACCAGCAATGGAAACTACTATGACTTGAGTGTGGTAGAGGTAGAGGGAATTTCCAGTGGAGCGGTGAAATGCGTAGATATTGGAAAGACCACCAATGGCGAAGGCACTCTACTGGGCCATTACTGACACTGAGAGACGAAAGCT	EarlySummer	0.668532	1.88917e-32		Cyanobacteria_209			Bacteria	Cyanobacteria	Cyanobacteria/Melainabacteria group		Synechococcales	Prochlorotrichaceae	Halomicronema	Halomicronema hongdechloris	Halomicronema hongdechloris C2206	Halomicronema hongdechloris C2206						Early-Summer	Early-Summer	0.65036	6.01e-18			Early-Summer	Summer	0.644496	1.64126e-26
CGTTATCCGGAATCATTGGGCGTAAAGCGCCTGTAGGTTGTTTAATAAGTCTGTTGTTAAAGACTAGGGCTTAACCCTAGAAAAGCAATGGAAACTACTAGACTAGAGTATGGCAGGGGTAGAGGGAATTTCTAGTGTAGCGGTGAAATGCGTAGATATTAGAAAGAACACCAGTGGCGAAAGCGCTCTACTGGACCATTACTGACACTCAGAGGCGAAAGCT	EarlySummer	0.667595	2.4759e-32		Cyanobacteria_154			Bacteria	Cyanobacteria	Cyanobacteria/Melainabacteria group		Chroococcales					Chroococcales						Early-Summer	Early-Summer	0.669069	2.99e-19			Early-Summer	Summer	0.413201	3.12043e-10
TGTTACTCCTAATGACTGGGCGTAAAGCGTGCGTAGGCGGTTTTCGTTACGGTTTTTATGCGAAAGACTAGGGCGTAACCCTAGGGTGATGTTTTTACACAGGAAACTTGAGTTTAGTAGGGGTTAGTGGAATTCTCAGAGGAGGGGTCAAATCCTAGTACACTGAGACGAACACCAGGTGGCGAAGGCGACTAACTGGACTAAACTGACGCTAAAGCACGGAAGCG	EarlySummer	0.66619	3.70643e-32		phylum_reps_2497																		Early-Summer	Early-Summer	0.463084	1.07e-08			Early-Summer	Summer	0.385811	5.26768e-09
CGTTGTTCGGAATCACTGGGCGTAAAGGGCGTGTAGGCGGAACGATTAGCGAGGGGTGAAATCCCGGGGCTCAACCCCGGAACTGCTCTTCGAACTGTCGATCTAGAGAAGGTCAGGGGCCGGCGGAATTCCTGGTGTAGAGGTGAAATTCGTAGAGATCAGGAGGAACATCGGAGGCGAAGGCGGCCGGCTGGGGCCATTCTGACGCTGAGGCGCGAAAGCG	EarlySummer	0.664045	6.83565e-32		phylum_reps_751																		Early-Summer	Early-Summer	0.793098	4.47e-31			Early-Summer	Summer	0.505653	2.7222e-15
CGTTATCCGGATTGATAGGGCGTAAAGTGTCTATAGATGGGTTATAATGTCTTATATTAAATATTGAATTTTAATATCAAATTAAATTAGAAACTTGGAATCTAGTGTATTGTAGATATATTGAGAATTCTTGGTGTAGAGGTAAAATTCGTAGAGTTCAAGAGGAATACTTACAGCGGAGGCGAGATATTGGATGATACTAAGACATTGAAGGACGAAAGCT	EarlySummer	0.657508	4.28123e-31		Firmicutes_Tenericutes_710			Bacteria	Tenericutes	Terrabacteria group	Mollicutes	Mycoplasmatales	Mycoplasmataceae				Mycoplasmataceae						Early-Summer	Early-Summer	0.49414	7.31e-10			Early-Summer	Summer	0.635004	1.47248e-25
CGTTATCCGGAATCATTGGGCGTAAAGCGCCTGTAGGTTGTTTAATAAGTCTGTTGTTAAAGACTAGGGCTCAACCCTAGGAAAGCAATGGAAACTACTAGACTTGAGTATGATAGGGGTAGAGGGAATTTCTAGTGTAGCGGTGAAATGCGTAGATATTAGGAAGAACACCGGTGGCGAAGGCGCTCTACTGGATCATTACTGACACTCAGAGGCGAAAGCT	EarlySummer	0.639108	5.90443e-29		Cyanobacteria_148			Bacteria	Cyanobacteria	Cyanobacteria/Melainabacteria group		Synechococcales					Synechococcales						Early-Summer	Early-Summer	0.689586	8.58e-21			Early-Summer	Summer	0.447608	6.12125e-12
CGTTAATCGGAATTACTGGGCGTAAAGCGCGCGTAGGCGGTTTGATAAGTGGGATGTGAAAGCCCCGGGCTCAACCTGGGAACTGCATTCCAAACTGTCAGACTAGAGTGTGGTAGAGGGAGGTAGAATTTCCTGTGTAGCGGTGAAATGCGTAGATATAGGAAGGAATACCGATGGCGAAGGCAGCCTCCTGGACCAACACTGACGCTGAGGTGCGAAAGCG	EarlySummer	0.63716	9.75702e-29		Proteobacteria_1628			Bacteria	Proteobacteria		Gammaproteobacteria	Alteromonadales	Alteromonadaceae				Alteromonadaceae						Early-Summer	Early-Summer	0.65479	3.01e-18			Early-Summer	Summer	0.669327	3.59554e-29
CGTTGTTCGGAATTACTGGGCGTAAAGGGAGCGCAGGCGGTTCATTTAGTCAGACGTGAAAGCCCCGGGCTCAACCCGGGAGGTGCGTTTGATACTGGTGAGCTAGAAATCAGAAGAGGATAGTGGAATTCCCAGTGTAGAGGTGAAATTCGTAGATATTGGGAAGAACACCAGTGGCGAAAGCGGCTATCTGGTCTGTATTTGACGCTGAGGCTCGAAAGCG	EarlySummer	0.635601	1.45428e-28		Proteobacteria_6566			Bacteria	Proteobacteria	SAR116 cluster	Alphaproteobacteria			Candidatus Puniceispirillum	Candidatus Puniceispirillum marinum	Candidatus Puniceispirillum marinum IMCC1322	Candidatus Puniceispirillum marinum IMCC1322						Early-Summer	Late-Summer	0.592384	1.96e-14			Early-Summer	Summer	0.748029	1.30632e-39
CGTTATCCGGAATCATTGGGCGTAAAGCGCCTGTAGGTTGTTTACTAAGTCTGTTGTTAAAGACTAGGGCTTAACCCTAGAAAAGCAATGGAAACTTGTAGACTAGAGTATGGCAGGGGTAGAGGGAATTTCTAGTGTAGCGGTGAAATGCGTAGATATTAGAAAGAACACCAGTGGCGAAAGCGCTCTACTGGACCATTACTGACACTCAGAGGCGAAAGCT	EarlySummer	0.635475	1.50208e-28		Cyanobacteria_154			Bacteria	Cyanobacteria	Cyanobacteria/Melainabacteria group		Chroococcales					Chroococcales						Early-Summer	Early-Summer	0.594213	1.56e-14			Early-Summer	Summer	0.409109	4.83912e-10
CGTTATCCGGAATCATTGGGCGTAAAGCGCCTGTAGGTTGTTTAATAAGTCTGTTGTTAAAGACTAGGGCTTAACCCTAGGAAAGCAATGGAAACTACTAGACTAGAGTATGGTAGGGGTAGAGGGAATTTCTAGTGTAGCGGTGAAATGCGTAGATATTAGAAAGAACACCGGTGGCGAAGGCGCTCTACTGGACCATTACTGACACTCAGAGGCGAAAGCT	EarlySummer	0.631061	4.59125e-28		Cyanobacteria_135			Bacteria	Cyanobacteria	Cyanobacteria/Melainabacteria group													Early-Summer	Early-Summer	0.441096	6.13e-08			Early-Summer	Summer	0.599178	3.04114e-22
TGTTATCCGGAATCACTGGGCGTAAAGCGTCTGTAGGTTGTTTAGTAAGTCCAATGTTAAAGGTTGAAGCTCAACTTCAAAAATGCGTTGGAAACTACTAGACTTGAGTATAATTGAAGCAGAAGGAATTTCTAGTGAAGCGGTGAAATGCGTAGATATTAGAAGGACCACCAAAGGCGAAAGCATTCTGTTAAATTATCACTGACACTCAGAGACGAAAGCT	EarlySummer	0.630774	4.93514e-28		Cyanobacteria_78			Bacteria	Cyanobacteria	Cyanobacteria/Melainabacteria group		Nostocales	Aphanizomenonaceae	Cylindrospermopsis	Cylindrospermopsis curvispora	Cylindrospermopsis curvispora GIHE-G1	Cylindrospermopsis curvispora GIHE-G1						Early-Summer	Early-Summer	0.609616	2.1e-15			Early-Summer	Summer	0.430708	4.46184e-11
CGTTATCCGGAATCATTGGGTGTAAAGCGTCTGTAGGTTGTTTATTTAAGTCAGTTGTTAAATTTCAGAACTCAATTTTGATAACGGCAACTGAAACTAATAAGCTAGAGTCAAGTAGAGGTAGAAGGAACTCCGAGTGTAGTGGTGAAATGCGTAGATATTCGGAAGAACACCGATGGCGAAAGCATTCTGCTGGGCTTGTACTGACACTGAGAGACGAGAGCG	EarlySummer	0.630239	5.64303e-28		Firmicutes_Tenericutes_884			Bacteria	Tenericutes	Terrabacteria group	Mollicutes	Mycoplasmatales	Mycoplasmataceae				Mycoplasmataceae						Early-Summer	Early-Summer	0.411533	5.32e-07			Early-Summer	Summer	0.358059	7.16673e-08
CGTTATCCGGAATTATTGGGCGTAAAGCGTCTGTAGGTGGTTTGGTAAGTTTACGGTCAAAGAACACAGCTTAACTGTGTGCAGGCCGTAAAAACTACCAGACTTGAGTACGGTAGGGGCAGAGGGAATTCCCAGTGGAGCGGTGAAATGCGTAGAGATTGGGAAGAACACCAAAGGCGAAAGCACTCTGCTGGGCCGTTACTGACACTCAGAGACGATAGCC	EarlySummer	0.603286	3.50538e-25		Cyanobacteria_136			Bacteria	Cyanobacteria	Cyanobacteria/Melainabacteria group		Synechococcales	Leptolyngbyaceae	Leptolyngbya	Leptolyngbya sp. PCC 7376		Leptolyngbya sp. PCC 7376						Early-Summer	Early-Summer	0.44236	5.57e-08			Early-Summer	Summer	0.477885	1.31053e-13
CGTTGTTCGGAATTACTGGGCGTAAAGGGCGCGTAGGCGGTCCTTTAAGTTAGGCGTGAAAGCCCCGGGCTCAACCTGGGAACTGCGCTTAAGACTGGAGGACTAGAAAACGGAAGAGGGTAGTGGAATTCCCAGTGTAGAGGTGAAATTCGTAGATATTGGGAAGAACACCAGTGGCGAAAGCGGCTACCTGGTCCGATTTTGACGCTGAGGCGCGAAAGCG	EarlySummer	0.602653	4.04665e-25		Proteobacteria_6566			Bacteria	Proteobacteria	SAR116 cluster	Alphaproteobacteria			Candidatus Puniceispirillum	Candidatus Puniceispirillum marinum	Candidatus Puniceispirillum marinum IMCC1322	Candidatus Puniceispirillum marinum IMCC1322						Early-Summer	Early-Summer	0.599109	8.34e-15			Early-Summer	Summer	0.574461	3.45543e-20
CGTTATTTGGAGTAACTCGGCGTAAAGCGTTCGTATTTTGTATTCCAGCCGTTGCATGTGAAAGCCATTATTCAATTTTTGGAGCCGCATTTAAAACGTTCATACTCGAGTGCAATCGAAGATTTCTTGGTATTTTTTGAGGAAGGGTAAAATCTGTCGAACCAAAAAGGAATTTCGAAAAGCGAAAGCTATTGTCTAGATTGCCACTGACAAAAAAGGACGAAAGCG	EarlySummer	0.592002	4.3373e-24		Proteobacteria_3590			Bacteria	Proteobacteria		Betaproteobacteria			Candidatus Nasuia	Candidatus Nasuia deltocephalinicola		Candidatus Nasuia deltocephalinicola						Early-Summer	Fall/Winter	0.175263	0.0397745			Early-Summer	Summer	0.377543	1.17641e-08
CGTTGTTCGGAATTACTGGGCGTAAAGGGCGCGCAGGCGGCCTATCCAGTCAGGTGTGAAAGCCCCGAGCTCAACTTGGGAACTGCACTTGATACTGATAGGCTAGAAAACGGAAGAGGGCAGTGGAATTCCCAGTGTAGAGGTGAAATTCGTAGATATTGGGAAGAACACCAGTGGCGAAAGCGGCTGCCTGGTCCGATTTTGACGCTGAGGCGCGAAAGCG	EarlySummer	0.590851	5.57429e-24		Proteobacteria_6566			Bacteria	Proteobacteria	SAR116 cluster	Alphaproteobacteria			Candidatus Puniceispirillum	Candidatus Puniceispirillum marinum	Candidatus Puniceispirillum marinum IMCC1322	Candidatus Puniceispirillum marinum IMCC1322						Early-Summer	Chlorophyll-a	0.641483	2.32e-17			Early-Summer	Summer	0.589578	2.006e-21
CGTTGTCCGGAATCATTGGGTGTAAAGGGTACGTAGGCGGGAGCCTAAGTCTGGGGTGAAATCTTGCCGCTTAACGGTAAAATGGCCCTGGATACTGGGTTTCTTGAGTGCAGAAGAGGCAGGTGGAATTCGTGGTGTAGCGGTGAAATGCTTAGATATCACGAAGAACATCAGTGGCGAAGGCGGCCTGCTGGTCTGCAACTGACGCTGAGGTACGAAAGCG	EarlySummer	0.586082	1.56089e-23		phylum_reps_735																		Early-Summer	Late-Summer	0.493248	7.93e-10			Early-Summer	Summer	0.613497	1.61728e-23
TGTTATCCGGAATTATTGGGCGTAAAGCGTCTGTAGGTTGATCTTTAAGTCTTTTGTTAAATCTTTGGGCTCAACCCGAAATCTGCAAAAGAAACTATTGATCTTGAGTCTGGTAGAGGTAAAGGGAATTTCCAGTGGAGCGGTGAAATGCGTAGAGATTGGAAAGAACACCAACAGCGAAGGCACTTTACTGGGCCATGACTGACACTGAGAGACGAAAGCT	EarlySummer	0.58474	2.0792e-23		Cyanobacteria_159			Bacteria	Cyanobacteria	Cyanobacteria/Melainabacteria group													Early-Summer	Early-Summer	0.400143	1.16e-06			Early-Summer	Summer	0.407671	5.63764e-10
CGTTATCCGGAATCATTGGGCGTAAAGCGCCTGTAGGTTGTTTAATAAGTCTGTTGTTAAAGACTAGGGCTTAACCCTAGAAAAGCAATGGAAACTACTAGACTAGAGTATGGCAGGGGTAGAGGGAATTTCTAGTGTAGCGGTGAAATGCGTAGATATTAGAAAGAACACCGGTGGCGAAAGCGCTCTACTGGACCATTACTGACACTCAGAGGCGAAAGCT	EarlySummer	0.563058	1.78759e-21		Cyanobacteria_135			Bacteria	Cyanobacteria	Cyanobacteria/Melainabacteria group													Early-Summer	Early-Summer	0.5272	3.07e-11			Early-Summer	Summer	0.307375	4.61494e-06
TGTTATTCGGAATGACTGGGTGTAAAGAGTCTGTAGGCGGTTTTTTAAGTTGAAATATAAATCTTGTAGCTTGACTTCAAGAAAGGTTTCAAAACTGAAAGACTAGAGTTTGATAGGGGAAAGTAGAATTTCTAATGGAGGGATAAAATTCATAGAGATTAGAAGGAATACCAGAGGCGAAGGCGACTTTCTGGATCAAAACTGACGCTGAGAGACGAAAGCA	EarlySummer	0.55517	8.34642e-21		Proteobacteria_6887			Bacteria	Proteobacteria		Gammaproteobacteria	Oceanospirillales	Halomonadaceae	Candidatus Carsonella	Candidatus Carsonella ruddii		Candidatus Carsonella ruddii						Early-Summer	Late-Summer	0.409717	6.03e-07			Early-Summer	Summer	0.391878	2.87947e-09
CGTTATCCGGAATCATTGGGCGTAAAGCGCCTGTAGGTTGTTTATTAAGTCTGTTGTTAAAGCCTAGGGCTTAACCCTAGAGAAGCAGTGGAAACTGGTAGACTAGAGTATGGCAGGGGTAGAGGGAATTTCTAGTGTAGCGGTGAAATGCGTAGATATTAGAAAGAACACCAGCGGCGAAGGCGCTCTACTGGACCATCACTGACACTCAGAGGCGAAAGCT	EarlySummer	0.545398	5.32357e-20		Cyanobacteria_154			Bacteria	Cyanobacteria	Cyanobacteria/Melainabacteria group		Chroococcales					Chroococcales						Early-Summer	Spring	0.50007	4.24e-10			Early-Summer	Summer	0.313155	2.97857e-06
TGTTATCCGGAATTACTGGGCGTAAAGCGTCTGTAGGTGGTTTAGTAAGTCGATTGTTAAAGCTTGAGGCTTAACTTCAAAACAGCAATGGAAACTGCTAGACTTGAGTATGGTAGAGGTAAAAGGAATTTCCAGTGGAGCGGTGAAATGCGTAGATATTGGAAAGAACACCGATGGCGAAGGCATTTTACTGGGCCATAACTGACACTCAGAGACGAAAGCT	EarlySummer	0.541567	1.0831e-19		Cyanobacteria_148			Bacteria	Cyanobacteria	Cyanobacteria/Melainabacteria group		Synechococcales					Synechococcales						Early-Summer	Spring	0.527981	2.84e-11			Early-Summer	Summer	0.203377	0.00279864
TGTTATCCGGAATCACTGGGCGTAAAGCGTCTGTAGGTGGTTTAGTAAGTCAGTTGTTACAAGTTGAAGCTTAACTTCAAACCAGCAATCGATACTGCTAGACTTGAGTATAGTAGAGGTAAAAGGAATTTCCAGTGGAGCGGTGAAATGCGTAGATATTGGAAAGAACACCGATGGCGAAGGCATTTTACTGGGCTATAACTGACACTCAGAGACGAAAGCT	EarlySummer	0.536117	2.92857e-19		Cyanobacteria_148			Bacteria	Cyanobacteria	Cyanobacteria/Melainabacteria group		Synechococcales					Synechococcales						Early-Summer	Late-Summer	0.562155	7.26e-13			Early-Summer	Summer	0.322002	1.4968e-06
CGTTGTTCGGAATTACTGGGCGTAAAGGGAGCGCAGGCGGTTCATTAAGTTAGGCGTGAAAGCCCCGGGCTCAACCTGGGAACTGCGTTTAATACTGATGAACTAGAAAACAGGAGAGGGTAGTGGAATTTCCAGTGTAGAGGTGAAATTCGTAGATATTGGAAAGAACACCGGTGGCGAAAGCGGCTACCTGGCCTGATTTTGACGCTGAGGCTCGAAAGCG	EarlySummer	0.529773	9.11648e-19		Proteobacteria_6566			Bacteria	Proteobacteria	SAR116 cluster	Alphaproteobacteria			Candidatus Puniceispirillum	Candidatus Puniceispirillum marinum	Candidatus Puniceispirillum marinum IMCC1322	Candidatus Puniceispirillum marinum IMCC1322						Early-Summer	Early-Summer	0.615885	9.02e-16			Early-Summer	Summer	0.690939	1.05412e-31
TGTTATTCAGAATAATTGGGCGTAAAGGGCACGTAGGCGGCTTTGTAAGTATAAGGTTAAATTCCAGAGCTTGACTGTGGATCCGCCTTATAAACTAAAAAGCTTGAGCTTGAAAGAGGATACTAGAATTTCGAGTGGAGAGGTCAAATTCTTAGAGATTCGAAGGAATACCAAATGCGAAGGCCTGTATCTGGTTCAAAGCTGACGCTGAGGTGCGAAAGCA	EarlySummer	0.528811	1.08065e-18		Proteobacteria_5170			Bacteria	Proteobacteria		Alphaproteobacteria	Rickettsiales	Anaplasmataceae	Wolbachia			Wolbachia						Early-Summer	Early-Summer	0.488075	1.26e-09			Early-Summer	Summer	0.31983	1.77585e-06
CGTTATCCGGAATCATTGGGCGTAAAGCGCCTGTAGGTTGTTTATTAAGTCTGTTGTTAAAGACTAGGGCTTAACCCTAGAAAAGCAATGGAAACTAATAGACTAGAGTATGGCAGGGGTAGAGGGAATTTCTAGTGTAGCGGTGAAATGCGTAGATATTAGAAAGAACACCAGTGGCGAAAGCGCTCTACTGGACCATTACTGACACTCAGAGGCGAAAGCT	EarlySummer	0.524753	2.20159e-18		Cyanobacteria_154			Bacteria	Cyanobacteria	Cyanobacteria/Melainabacteria group		Chroococcales					Chroococcales						Early-Summer	Early-Summer	0.654189	3.31e-18			Early-Summer	Summer	0.329246	8.38047e-07
CGTTAATCGGAATTACTGGGCGTAAAGGGTGCGTAGGTGGATTTACAAGTTAGTGGTGAAAGCCCTGGGCTCAACCTAGGAATTGCCATTAAAACTGTAAATCTAGAGTCTTGTAGAGGAAGGCGGAATTCCCGGTGTAGCGGTGAAATGCGTAGATATCGGGAGGAACACCAGTGGCGAAGGCGGCCTTCTGGACAAAGACAGACACTGAGGCACGAAAGCG	EarlySummer	0.520636	4.48858e-18		Proteobacteria_6610			Bacteria	Proteobacteria		Gammaproteobacteria				endosymbiont of Plagiopylea sp.		endosymbiont of Plagiopylea sp.						Early-Summer	Early-Summer	0.483293	1.93e-09			Early-Summer	Summer	0.281775	2.87755e-05
CGTTATCCGGAATCATTGGGTTTAAAGGGTCCGTAGGCGGTTTTTTAAGTCAGAGGTGAAATCCTGCAGCTCAACTGTAGCATTGCCTTTGATACTGAAAGACTTGAGTTATTGTGAAGTAGTTAGAATGTGTAGTGTAGCGGTGAAATGCATAGATATTACACAGAATACCGATTGCGAAGGCAGATTACTAACAATATACTGACGCTGAGGGACGAAAGCG	EarlySummer	0.515672	1.04612e-17		Bacteroidetes_975			Bacteria	Bacteroidetes	FCB group	Flavobacteriia	Flavobacteriales	Flavobacteriaceae	Kordia			Kordia						Early-Summer	Chlorophyll-a	0.547458	3.7e-12			Early-Summer	Summer	0.630312	4.23589e-25
TGGTCGTCGCTTTTATTGGGCCTAAAACGTCCGTAGCCTGTTTGGTAAATCTGTGGGTAAATCAACCAGCTTAACTGGTTGAATTCTGCAGAGACTGCCAGACTAGGGACCGGGAGAGGTGTGGGGTACTCTAGGGGTAGGGGTAAAATCCTGTCATCCTTAGAGGACCACCAGTTGCGAAGGCGCCACACTGGAACGGATTCGACGGTCAGGGACGAAGCCT	EarlySummer	0.513985	1.39029e-17		archaea_4			Archaea	Euryarchaeota	Diaforarchaea group	Thermoplasmata	Methanomassiliicoccales					Methanomassiliicoccales						Early-Summer	Early-Summer	0.590638	2.44e-14			Early-Summer	Summer	0.516282	5.61585e-16
CGTTATCCGAAATCATTGGGCGTAAAGCGCCTGTCGGTGGTTTTTCAAGTCCATTGTTAAAGCGTTCAGCTCAACTGAATATCAGCGATGGAAACTGGAAGACTTGAGTATGAGAGGAGTCGAGGGAATTCTCAGTGGAGCGGTGGAATGCGTAGAGATTGAGAAGAACACCAATGGCGAAAGCACTCGGCTGGCTCATAACTGACACTCAGAGGCGAAAGCC	EarlySummer	0.506348	4.9413e-17		Cyanobacteria_148			Bacteria	Cyanobacteria	Cyanobacteria/Melainabacteria group		Synechococcales					Synechococcales						Early-Summer	Early-Summer	0.393236	1.83e-06			Early-Summer	Summer	0.446346	7.12689e-12
CGTTGTTCGGAATTACTGGGCGTAAAGGGCGCGTAGGCGGTCTTTTAAGTTAGGCGTGAAAGCCCCGGGCTCAACCTGGGAACTGCGCTTAAAACTGGAAGACTAGAAAACGGAAGAGGGTAGTGGAATTCCCAGTGTAGAGGTGAAATTCGTAGATATTGGGAAGAACACCAGTGGCGAAAGCGGCTACCTGGTCCGATTTTGACGCTGAGGCGCGAAAGCG	EarlySummer	0.505737	5.46137e-17		Proteobacteria_6566			Bacteria	Proteobacteria	SAR116 cluster	Alphaproteobacteria			Candidatus Puniceispirillum	Candidatus Puniceispirillum marinum	Candidatus Puniceispirillum marinum IMCC1322	Candidatus Puniceispirillum marinum IMCC1322						Early-Summer	Late-Summer	0.624637	2.68e-16			Early-Summer	Summer	0.516011	5.85048e-16
TGTTATTCGAAATAACTGGGCGTAAAGGGTACGTAGGCGGCTTATCAAGTTAGACTTTAAAGTCCTAAGCTCAACTTAGGTTCTGGGTCTAAAACTGTTAAGCTAGAATAAGATAGAGGATAGTGGAATTTCTAATGGAGGGTTAAGTTCTTTAGATATTAGAAGGAACATCGGTGGCGAAGGCGACTATCTGGATCTTTATTGACGCTGTGGTACGAAGGCA	EarlySummer	0.500114	1.35926e-16		Proteobacteria_5124			Bacteria	Proteobacteria		Alphaproteobacteria						Alphaproteobacteria						Early-Summer	Early-Summer	0.28041	0.000864726			Early-Summer	Summer	0.340392	3.33308e-07
CGTTATCCGGAATCATTGGGTTTAAAGGGTCCGTAGGTGGATAATTAAGTCAGGGGTGAAATCTTGCAGCTCAACTGTAAAATTGCCTTTGATACTGGTTATCTTGAGTCATTATGAAGTAGTTAGAATATGTAGTGTAGCGGTGAAATGCATAGATATTACATAGAATACCAATTGCGAAGGCAGATTACTAATAATGTACTGACACTGATGGACGAAAGCG	EarlySummer	0.49948	1.50485e-16		Bacteroidetes_1010			Bacteria	Bacteroidetes	FCB group	Flavobacteriia	Flavobacteriales	Flavobacteriaceae	Formosa	Formosa sp. L2A11		Formosa sp. L2A11						Early-Summer	Chlorophyll-a	0.49142	9.35e-10			Early-Summer	Summer	0.346925	1.90876e-07
CGTTGTTCGGAATCACTGGGCGTAAAGCGTATGTAGGCGGATCAAAAAGTTAGATGTGAAATCCCTGGGCTCAACCCAGGAACTGCATTTAAAACTAGTGATCTAGAATTTGGTAGGGGCCAGTAGAATTTCCAGTGTAGAGGTGAAATTCGTAGATATTGGAAAGAATACCAGTGGCGAAGGCGACTGGCTGGGCCATTTTTGACGCTGAGATACGAAAGCG	EarlySummer	0.498787	1.68143e-16		Proteobacteria_6280			Bacteria	Proteobacteria		Alphaproteobacteria	Sphingomonadales	Sphingomonadaceae	Novosphingobium	Novosphingobium sp. Gsoil 351		Novosphingobium sp. Gsoil 351						Early-Summer	Spring	0.611572	1.62e-15			Early-Summer	Summer	0.174907	0.0103631
CGTTATCCGGATTAATTGGGCGTAAAGTATCCGTAGGTGGTTTTTTAAGTCTTGTGTTAAAGGTTAAAGCTCAACTTTAAACTGGCATTTGAAACTAAGAGACTTGAGTATGATAGAAGCAGTGGGAATTCCCGGTGTAGTGGTGAAATATGTAGAGTTCGGGAAGAACACCAGAAGCGAAGGCGCACTGCTGGGTCATTACTGACACTCAGGGACGAAAGCT	EarlySummer	0.496934	2.25953e-16		Cyanobacteria_116			Bacteria	Cyanobacteria	Cyanobacteria/Melainabacteria group		Chroococcidiopsidales	Chroococcidiopsidaceae	Chroococcidiopsis	Chroococcidiopsis thermalis	Chroococcidiopsis thermalis PCC 7203	Chroococcidiopsis thermalis PCC 7203						Early-Summer	NA	NA	NA			Early-Summer	Summer	0.401028	1.13122e-09
CGTTACTCGGATTCACTGGGCGTAAAGGGTACGTAGGTGGCATAGTGTGTCAGGTGTGAAATCTCGGGGCTTAACTCCGAAACTGCGCCTGAAACTACTAAGCTAGAGTTTTGGAGAGGACAGTGGAATTCTTGGTGTAGCGGTGAAATGCGTAGATATCAAGAGGAACACCGATAGCGAAGGCAGCTGTCTGGACAAATACTGACACTCAAGTACGAAAGCG	EarlySummer	0.489559	7.19793e-16		Verrucomicrobia_5			Bacteria	Verrucomicrobia	PVC group	Opitutae	Puniceicoccales	Puniceicoccaceae	Coraliomargarita	Coraliomargarita akajimensis	Coraliomargarita akajimensis DSM 45221	Coraliomargarita akajimensis DSM 45221						Early-Summer	NA	NA	NA			Early-Summer	Summer	0.259394	0.000123896
CGTTATCCGGAATCATTGGGCGTAAAGCGCCTGTAGGTTGTTTATCAAGTCTGTTGTTAAAGACTAGGGCTTAACCCTAGAAAAGCAATGGAAACTGATAGACTAGAGTATGGCAGGGGTAGAGGGAATTTCTAGTGTAGCGGTGAAATGCGTAGATATTAGAAAGAACACCGGTGGCGAAAGCGCTCTACTGGACCATTACTGACACTCAGAGGCGAAAGCT	EarlySummer	0.483489	1.82977e-15		Cyanobacteria_192			Bacteria	Cyanobacteria	Cyanobacteria/Melainabacteria group													Early-Summer	Early-Summer	0.522771	4.79e-11			Early-Summer	Summer	0.332105	6.63839e-07
CGTTACTCGGATTCACTGGGCGTAAAGGGTGAGTAGGCGGCCATGTATGTCGGGTGTGAAATCCCGGGGCTTAACCCCGGAACTGCGCCCGAAACTACTTGGCTAGAGTCTCGGAGAGGATAGTGGAATTCCAGGTGTAGCGGTGAAATGCGTAGATATCTGGAGGAACACCAGTGGCGAAGGCGACTGTCTGGACGAGAACTGACGCTCAATCACGAAAGCG	EarlySummer	0.48204	2.27999e-15		Verrucomicrobia_5			Bacteria	Verrucomicrobia	PVC group	Opitutae	Puniceicoccales	Puniceicoccaceae	Coraliomargarita	Coraliomargarita akajimensis	Coraliomargarita akajimensis DSM 45221	Coraliomargarita akajimensis DSM 45221						Early-Summer	Late-Summer	0.469909	6.07e-09			Early-Summer	Summer	0.570121	7.61638e-20
CGTTAATCGGAATTACTGGGCGTAAAGCGCGCGTAGGCGGTTTTTTAAGTCGGATGTGAAAGCCCCGGGCTCAACCTGGGAACTGCACCCGATACTGGATAACTAGAATGCGGGAGAGGGAGGTAGAATTCCATGTGTAGCAGTGAAATGCGTAGATATATGGAGGAATACCAGTGGCGAAGGCGGCCTCCTGGCTCGACATTGACGCTGAGGTGCGAAAGCG	EarlySummer	0.476943	4.90231e-15		Proteobacteria_1589			Bacteria	Proteobacteria		Gammaproteobacteria	Cellvibrionales	Halieaceae	Halioglobus	Halioglobus pacificus		Halioglobus pacificus						Early-Summer	Early-Summer	0.384897	3.14e-06			Early-Summer	Summer	0.403165	9.05698e-10
TGTTATCCGGAATTATTGGGCGTAAAGCGTCTGCAGGTTGTTTTATAAGTCTATTGTTAAAGGTCGAAGCTTAACTTCGAAAATGCAGTAGAAACTGTTTAACTAGAGTATGGTCGAAGTAGAAGGAATTTCCAGTGGAGTGGTGAAATGCGTAGATATTGGAAAGAACACCGATGGCGAAAGCATTCTATTAGGGCATTACTGACACTCAGAGACGAAAGCT	EarlySummer	0.471953	1.02471e-14		Cyanobacteria_135			Bacteria	Cyanobacteria	Cyanobacteria/Melainabacteria group													Early-Summer	Early-Summer	0.484677	1.7e-09			Early-Summer	Summer	0.309216	4.01811e-06
TGTTATCCGGAATCACTGGGCGTAAAGCGTCTGTAGGTGGTTTAATAAGTCTATTGTTAAAGCTTGAGGCTTAACTTCAAATCAGCAATGGAAACTATTAGACTTGAGTATAGTAGAGGTAAAAGGAATTTCCAGTGGAGCGGTGAAATGCGTAGATATTGGAAAGAACACCGATGGCGAAGGCATTTTACTGGGCTATAACTGACACTCAGAGACGAAAGCT	EarlySummer	0.464661	2.9461e-14		Cyanobacteria_148			Bacteria	Cyanobacteria	Cyanobacteria/Melainabacteria group		Synechococcales					Synechococcales						Early-Summer	Early-Summer	0.504837	2.72e-10			Early-Summer	Summer	0.238305	0.000437304
CGTTATCCGGATTTATTAGGTTTAAAGGGTCCGCAGGCGGGATTTTAAGTCAGTGGTGAAAGCCTACAGCTCAACTGTAGAACTGCCATTGATACTGAAATTCTTGAGTGTGGTTGAAGTGGGCGGAACATGTCATGTAGCGGTGAAATGCATAGATATGACATAGAACACCAATTGCGAAGGCAGCTCACTAAGCCATTACTGACGCTGAGGGACGAAAGCG	EarlySummer	0.464067	3.20739e-14		Bacteroidetes_518			Bacteria	Bacteroidetes	FCB group	Flavobacteriia	Flavobacteriales	Schleiferiaceae	Owenweeksia	Owenweeksia hongkongensis	Owenweeksia hongkongensis DSM 17368	Owenweeksia hongkongensis DSM 17368						Early-Summer	Chlorophyll-a	0.632024	9.34e-17			Early-Summer	Summer	0.205129	0.00256698
CGTTACTCATTGTAATTTGGTGTAAAGGGTTCGTAGGTTGTATTGAGGTTGTTTTAGGTAAAATTTAAAAGCTTTAACTTTTAAGCAAAGCCTTAAAAACACCAATACTTGAGTTTAGTGTAAGATTATAGAATTTTAAGCGTAGAGATAAAATTTTAAGAGGCTTAAAGGAATGTCAAAAGCGAAGGCAATAATCTATTCTAATACTGACACTGAGGGACGAAGGAA	EarlySummer	0.462416	4.05812e-14		Proteobacteria_6887			Bacteria	Proteobacteria		Gammaproteobacteria	Oceanospirillales	Halomonadaceae	Candidatus Carsonella	Candidatus Carsonella ruddii		Candidatus Carsonella ruddii						Early-Summer	Early-Summer	0.273074	0.00119307			Early-Summer	Summer	0.325172	1.16336e-06
CGTTATCCGGAATCATTGGGCGTAAAGCGCCTGTAGGTGGTTTACTAAGTCTGTTGTTAAAGACTAGGGCTTAACCCTAGGAAAGCAATGGAAACTAATAGACTAGAGTATGGCAGGGGTAGAGGGAATTTCTAGTGTAGCGGTGAAATGCGTAGATATTAGAAAGAACACCAGTGGCGAAAGCGCTCTACTGGACCATTACTGACACTCAGAGGCGAAAGCT	EarlySummer	0.462396	4.0695e-14		Cyanobacteria_154			Bacteria	Cyanobacteria	Cyanobacteria/Melainabacteria group		Chroococcales					Chroococcales						Early-Summer	Early-Summer	0.507785	2.06e-10			Early-Summer	Summer	0.421668	1.23527e-10
CGTTGTTCGGAATTACTGGGCGTAAAGCGCATGTAGGCGGAACAGAAAGTTAGAAGTGAAATCCCTGGGCTCAACCTAGGAATTGCTTTTAAAACTTCTGTTCTGGAATTCAGGAGAGGAAAATGGAATATCCAGTGTAGAGGTGAAATTCGTAGATATTGGATGGAACACCAGTGGCGAAGGCGATTTTCTGGACTGATATTGACGCTGAGATGCGAAGGCA	EarlySummer	0.459042	6.53602e-14		Proteobacteria_5889			Bacteria	Proteobacteria		Alphaproteobacteria	Rhodobacterales	Rhodobacteraceae	Paracoccus	Paracoccus jeotgali		Paracoccus jeotgali						Early-Summer	Spring	0.648923	7.5e-18			Early-Summer	Summer	0.352937	1.12995e-07
CGTTGTTCGGATTTACTGGGCGTAAAGAGCGCGTAGGTGGTTTAATAAGTTAGAAGTGAAATCCCGGAGCTCAACTTCGGAACTGCTTCTAAAACTGTTTAACTAGAGTGTGGTAGGGGGTAATAGAATTCCTAGTGTAGAAGTGAAATTCTTAGATATTAGGAGGAATACCGATGGCGAAGGCGATTACCTGGGCCATAACTGACACTAATGCGCGAAAGCG	EarlySummer	0.455868	1.0187e-13		Proteobacteria_5050			Bacteria	Proteobacteria		Alphaproteobacteria	Rickettsiales	Rickettsiaceae	Candidatus Phycorickettsia	Candidatus Phycorickettsia trachydisci		Candidatus Phycorickettsia trachydisci						Early-Summer	Early-Summer	0.354097	2.04e-05			Early-Summer	Summer	0.470018	3.69086e-13
TTTTATTCGGAATTATTGGGCGTAAAGCGTCTGCAGGTTGATGTAAAAGTCTTTTGTTAAATATCAGGGCTCAACCCGGAATCTGCAAAAGAAACTATATATCTCGAGTATGGTAGAGGTAAGGGGAATTTCCAGTGGAGCGGTGAAATGCGTAGATATTGGAAAGAACACCGATAGCGAAGGCACCTTACTGGGCCATTACTGACACTCAGAGACGAAAGCT	EarlySummer	0.450617	2.10123e-13		Cyanobacteria_160			Bacteria	Cyanobacteria	Cyanobacteria/Melainabacteria group													Early-Summer	Early-Summer	0.316136	0.000158524			Early-Summer	Summer	0.16497	0.0157029
TGTTATCCGGAATCACTGGGCGTAAAGCGTCTGTAGGTGGTTTAGTAAGTCAACTGTTAAATCTTGAAGCTCAACTTCAAAATCGCAGTCGAAACTATTAGACTAGAGTATAGTAGGGGTAAAGGGAATTTCCAGTGGAGCGGTGAAATGCGTAGAGATTGGAAAGAACACCGATGGCGAAGGCACTTTACTGGGCTATTACTGACACTCAGAGACGAAAGCT	EarlySummer	0.448663	2.74234e-13		Cyanobacteria_151			Bacteria	Cyanobacteria	Cyanobacteria/Melainabacteria group		Chroococcales	Chroococcaceae	Geminocystis	Geminocystis sp. NIES-3709		Geminocystis sp. NIES-3709						Early-Summer	Fall/Winter	0.246184	0.00360696			Early-Summer	Summer	0.276052	4.23119e-05
CGTAGTTCGGAATTACTGGGCTTAAAGAGTTCGTAGGTGGTTGAAAAAGTTAGTGGTGAAATCCCAGAGCTTAACTCTGGAACTGCCATTAAAACTTTTCAGCTAGAGTATGATAGAGGAAAGCAGAATTTCTAGTGTAGAGGTGAAATTCGTAGATATTAGAAAGAATACCAATTGCGAAGGCAGCTTTCTGGATCATTACTGACACTGAGGAACGAAAGCA	EarlySummer	0.446916	3.47451e-13		Proteobacteria_5217			Bacteria	Proteobacteria		Alphaproteobacteria	Pelagibacterales	Pelagibacteraceae	Candidatus Pelagibacter			Candidatus Pelagibacter						Early-Summer	Spring	0.565724	4.83e-13			Early-Summer	NA	NA	NA
GGTTCTGGATGATGATTGGGTGTAAAGCAGGATAAGGTGGTAAGTACAAGTTTAAAGTCGACTAACCGAAAGGGCAGGAGGATTTTAGAAACTAACTTACTTGAGGGATTTTTAAGTTGAAAGCGGAACTCTATGGGGAGCGGTGTAATGCATTTCATCTATAGGGGAACACCAAAGACGATAAGTAGCCAACTGCAAATACCCTGCCACTAGACCTGAAACCT	EarlySummer	0.446451	3.69945e-13		Proteobacteria_3590			Bacteria	Proteobacteria		Betaproteobacteria			Candidatus Nasuia	Candidatus Nasuia deltocephalinicola		Candidatus Nasuia deltocephalinicola						Early-Summer	Late-Summer	0.403341	9.34e-07			Early-Summer	Summer	0.367824	2.94111e-08
CGTTATCCGGAATCATTGGGCGTAAAGCGCCTGTAGGTTGTTTAATAAGTCTGTTGTTAAAGCCTAGGGCTTAACCCTAGAAAAGCAATGGAAACTACTAGACTAGAGTATGGCAGGGGTAGAGGGAATTTCTAGTGTAGCGGTGAAATGCGTAGATATTAGAAAGAACACCAGTGGCGAAAGCGCTCTACTGGACCATTACTGACACTCAGAGGCGAAAGCT	EarlySummer	0.446351	3.74952e-13		Cyanobacteria_210			Bacteria	Cyanobacteria	Cyanobacteria/Melainabacteria group		Synechococcales	Acaryochloridaceae	Acaryochloris	Acaryochloris marina	Acaryochloris marina MBIC11017	Acaryochloris marina MBIC11017						Early-Summer	Early-Summer	0.518753	7.14e-11			Early-Summer	Summer	0.413018	3.18283e-10
CGTTATCCGAAATTACTGGGCGTAAAGAGTCCGTAGATTGTAATATAAGTTATATGTTAAAATTTAAAGCTTAACTTTAAAAAAATATACAATACTGTTTTACTTGAGTTTTATATGGAAGAGTAGAATTTCATGTTAAGGAGTAAATTCCAAGAATACATGAAGGAATATCATTAGCGAAGGCGACTCTTTAGTACAAACTGACATTGAGGGACGAAAGTG	EarlySummer	0.440997	7.66955e-13		Proteobacteria_6887			Bacteria	Proteobacteria		Gammaproteobacteria	Oceanospirillales	Halomonadaceae	Candidatus Carsonella	Candidatus Carsonella ruddii		Candidatus Carsonella ruddii						Early-Summer	Late-Summer	0.648722	7.73e-18			Early-Summer	Summer	0.446676	6.8494e-12
CGTTATCCGGAATTACTGGGTTTAAAGGGTGCGTAGGCGGTTAGGTAAGTCAGAGGTGAAATGTTATCGCTCAACGATAAAATTGCCTTTGATACTGCTTAACTTGAATCAGAATGAGGTTGGCGGAATGTGACATGTAGCGGTGAAATGCATAGATATGTCATGGAACACCGATTGCGAAGGCAGCTGACTGGCACTTGATTGACGCTGAGGCACGAAAGCG	EarlySummer	0.43413	1.8854e-12		Bacteroidetes_223			Bacteria	Bacteroidetes	FCB group	Saprospiria	Saprospirales	Haliscomenobacteraceae	Haliscomenobacter	Haliscomenobacter hydrossis	Haliscomenobacter hydrossis DSM 1100	Haliscomenobacter hydrossis DSM 1100						Early-Summer	Early-Summer	0.380022	4.28e-06			Early-Summer	Summer	0.527715	9.65828e-17
TGTTATTCGGATTAATTGGGCGTAAAGGGCGTGTAGGCTGTTCTTTGTCGTGATGTGTGAAAGCCCAAGATGTTCGCTTGGTTGTGCATATTAAACAAAAGAACTTGAGTTGAAGAGAGGAAAAAAGAATTTCTAGTGGAGAGGTTAAATTCATAGATATTAGAAGGAATACCAAAAGCGAAGGCATTTTTCTGGCTTTCAACTGACGCTGAGGCGCGAAAGCG	EarlySummer	0.432023	2.47488e-12		Proteobacteria_6887			Bacteria	Proteobacteria		Gammaproteobacteria	Oceanospirillales	Halomonadaceae	Candidatus Carsonella	Candidatus Carsonella ruddii		Candidatus Carsonella ruddii						Early-Summer	Early-Summer	0.343992	3.61e-05			Early-Summer	Summer	0.205451	0.00252629
CGTTATTCGGATTCACTGGGCGTAAAGGGTGCGCAGGCGGTCATGTGTGTCAGGTGTGAAATCTCGGAGCTCAACTCCGAAACTGCGCCTGAAACTACATGACTAGAGTATCGGAGAGGTGAGCGGAATTCATGGTGTAGCAGTGAAATGCGTAGATATCATGAGGAACACCAGAGGCGAAGGCGGCTCACTGGACGATTACTGACGCTCAGGCACGAAAGCA	EarlySummer	0.42775	4.27132e-12		Verrucomicrobia_4			Bacteria	Verrucomicrobia	PVC group	Opitutae	Opitutales	Opitutaceae				Opitutaceae						Early-Summer	Spring	0.533727	1.58e-11			Early-Summer	Summer	0.3725	1.89973e-08
CGTTATTCGGAATAACTGGGCGTAAAGCGAGCGTAGGCGGATTTGTAAGTTGGAGGTGAAATCCCAGGGCTTAACCCTGGAACTGCCTTCAAAACTACATTTCTTGAGTTTGGTAGAGGAGAGTGGAATTCCTAGTGTAGAGGTGAAATTCGTAGATATTAGGAGGAACACCAGTGGCGAAGGCGACTCTCTGGGCCAATACTGACGCTGAGGTTCGAAAGCG	EarlySummer	0.426778	4.83092e-12		Proteobacteria_5860			Bacteria	Proteobacteria		Alphaproteobacteria	Rhodobacterales	Rhodobacteraceae	Pseudorhodobacter	Pseudorhodobacter sp. S12M18		Pseudorhodobacter sp. S12M18						Early-Summer	Spring	0.567945	3.74e-13			Early-Summer	NA	NA	NA
CGTTATCCGGAATCATTGGGCGTAAAGCGCCTGTAGGTTGTTTAATAAGTCCGTTGTTAAAGACTAGGGCTTAACCCTAGGAAAGCGATGGAAACTGATAGACTTGAGTATGGCAGGGGTAGAGGGAATTTCTAGTGTAGCGGTGAAATGCGTAGATATTAGAAAGAACACCGGTGGCGAAAGCGCTCTACTGGACCATTACTGACACTGAGAGGCGAAAGCT	EarlySummer	0.422129	8.65783e-12		Cyanobacteria_148			Bacteria	Cyanobacteria	Cyanobacteria/Melainabacteria group		Synechococcales					Synechococcales						Early-Summer	Early-Summer	0.660305	1.25e-18			Early-Summer	NA	NA	NA
TTTTATCCGGAATTATTGGGCGTAAAGCGTCTGCAGGTTGATAATTAAGTCTTTTGTTAAATCTTTGGGCTCAACCCAAAATCTGCAAAAGAAACTATTTATCTTGAGTGTGGTAGAGGTAAGGGGAATTTCCAGTGGAGCGGTGAAATGCGTAGAGATTGGAAAGAACACCAATAGCGAAGGCACCTTACTGGGCCAGTACTGACACTGAGAGACGAAAGCT	EarlySummer	0.413356	2.54116e-11		Cyanobacteria_209			Bacteria	Cyanobacteria	Cyanobacteria/Melainabacteria group		Synechococcales	Prochlorotrichaceae	Halomicronema	Halomicronema hongdechloris	Halomicronema hongdechloris C2206	Halomicronema hongdechloris C2206						Early-Summer	Chlorophyll-a	0.223212	0.00849887			Early-Summer	Summer	0.213919	0.00164645
CGTTATCCGGAATCATTGGGCGTAAAGCGCCTGTAGGTTGTTTAATAAGTCTGTTGTTAAAGACTGGGGCTTAACCCCAGAAAAGCAATGGAAACTACTAGACTAGAGTATGGCAGGGGTAGAGGGAATTTCTAGTGTAGCGGTGAAATGCGTAGATATTAGAAAGAACACCAGTGGCGAAAGCGCTCTACTGGACCATTACTGACACTCAGAGGCGAAAGCT	EarlySummer	0.412229	2.91141e-11		Cyanobacteria_154			Bacteria	Cyanobacteria	Cyanobacteria/Melainabacteria group		Chroococcales					Chroococcales						Early-Summer	Late-Summer	0.329812	7.81e-05			Early-Summer	Summer	0.382659	7.17448e-09
CGTTAATCGGAATTACTGGGCGTAAAGCGCGCGTAGGCGGTTTTTTAAGTCGGATGTGAAAGCCCCGGGCTCAACCTGGGAATTGCATCCGATACTGGATGACTAGAATGCGGGAGAGGGAGGTAGAATTCCATGTGTAGCAGTGAAATGCGTAGATATATGGAGGAATACCAGTGGCGAAGGCGGCCTCCTGGCTCGACATTGACGCTGAGGTGCGAAAGCG	EarlySummer	0.409367	4.10399e-11		Proteobacteria_1589			Bacteria	Proteobacteria		Gammaproteobacteria	Cellvibrionales	Halieaceae	Halioglobus	Halioglobus pacificus		Halioglobus pacificus						Early-Summer	Chlorophyll-a	0.463246	1.06e-08			Early-Summer	Summer	0.41921	1.62097e-10
CGTTGTTCGGATTTACTGGGCGTAAAGCGTCTGTAGGCGGGATGGTAAGTCAGATGTGAAATCCCGGGGCTCAACCCCGGAACTGCATCCGATACTGCCAACCTAGAGGGTCGGAGGGGAGTCTGGAATTCTCGGTGTAGCAGTGAAATGCGTAGATATCGAGAGGAACACTCGTGGCGAAGGCGAGACTCTGGACGACACCTGACGCTGAGAGACGAAGGCC	EarlySummer	0.407355	5.21388e-11		Verrucomicrobia_27			Bacteria	Verrucomicrobia	PVC group	Verrucomicrobiae	Verrucomicrobiales					Verrucomicrobiales						Early-Summer	Chlorophyll-a	0.731251	2.35e-24			Early-Summer	Summer	0.236831	0.000475686
TGTTATCCGGAATCACTGGGCGTAAAGCGTCTGTAGGTGGTTTAATAAGTCGGGTGTTAAATCTTGAAGCTTAACTTCAAAACCGCATTCGAAACTGTTAAACTTGAGTATAGTAGAGGTAAAGGGAATTTCCAGTGGAGCGGTGAAATGCGTAGATATTGGAAAGAACACCGATGGCGAAGGCACTTTACTGGGCTAGTACTGACACTCAGAGACGAAAGCT	EarlySummer	0.395621	2.04083e-10		Cyanobacteria_148			Bacteria	Cyanobacteria	Cyanobacteria/Melainabacteria group		Synechococcales					Synechococcales						Early-Summer	Early-Summer	0.418538	3.25e-07			Early-Summer	Summer	0.301035	7.38138e-06
TGTTATTCAGAATAATTGGGCGTAAAGGGCACGTAGGCTGTTTTTCTTGTCAAAGGTGAAAACCCAGAGCTTCACTGTGGGAATACTTTTGAAACAGAAAAGCTTGAGCTTGAAAGAGGATACTAGAATTTCGAGTGGAGAGGTGAAATTCATAGAGATTCGAAGGAATACCAATTGCGAAGGCATGTATCTGGTTCAAAGCTGACGCTGAGGTGCGAAAGCA	EarlySummer	0.39171	3.17848e-10		Proteobacteria_5170			Bacteria	Proteobacteria		Alphaproteobacteria	Rickettsiales	Anaplasmataceae	Wolbachia			Wolbachia						Early-Summer	Early-Summer	0.277428	0.000986657			Early-Summer	Summer	0.364068	4.15736e-08
CGTTGTTCGGAATTACTGGGCGTAAAGCGCACGTAGGCGGGTTATTAAGTCAGATGTGAAATCCCAAGGCTCAACCTTGGAACTGCATTTGAAACTGATAGCCTAGAGATCAGGAGAGGTTAGCGGAATACCGAGTGTAGAGGTGAAATTCGTAGATATTCGGTGGAACACCAGTGGCGAAGGCGGCTAACTGGACTGATACTGACGCTGAGGTGCGAAAGTG	EarlySummer	0.381968	9.34808e-10		Proteobacteria_6100			Bacteria	Proteobacteria		Alphaproteobacteria	Hyphomonadales	Hyphomonadaceae	Hyphomonas			Hyphomonas						Early-Summer	Late-Summer	0.313389	0.000182027			Early-Summer	Summer	0.310539	3.63569e-06
CGTTATCCGGAATCATTGGGCGTAAAGCGTCTGTAGGTGGCTTGGTAAGTCTACTGTTAAAGAGTACAGCTTAACTGTATAAGGGCAGTAGAAACTACTAAGCTTGAGTGTGGTAGGGGCAGAGGGAATTCCCGGTGTAGCGGTGAAATGCGTAGAGATCGGGAAGAACACCAACGGCGAAAGCACTCTGCTGGGCCAACACTGACACTGAGAGACGAAAGCT	EarlySummer	0.374389	2.11181e-09		Cyanobacteria_48			Bacteria	Cyanobacteria	Cyanobacteria/Melainabacteria group		Nostocales	Calotrichaceae	Calothrix	Calothrix sp. 336/3		Calothrix sp. 336/3						Early-Summer	NA	NA	NA			Early-Summer	Summer	0.278653	3.55493e-05
CGTTACTCGGATTCACTGGGCGTAAAGGGTGCGTAGGCCGCTAAGCGTGTCGGGTGTGAAATCTCGGGGCTCAACCTCGAAACTGCGCCCGAAACTGTTTAGCTAGAGTGTCGGAGAGGTAAGCGGAATTCCAGGTGTAGCGGTGAAATGCGTAGATATCTGGAGGAACACCAATGGCGAAGGCAGCTTACTGGACGACAACTGACGCTGAGGCACGAAAGCG	EarlySummer	0.371965	2.72866e-09		Verrucomicrobia_5			Bacteria	Verrucomicrobia	PVC group	Opitutae	Puniceicoccales	Puniceicoccaceae	Coraliomargarita	Coraliomargarita akajimensis	Coraliomargarita akajimensis DSM 45221	Coraliomargarita akajimensis DSM 45221						Early-Summer	Spring	0.460389	1.34e-08			Early-Summer	Summer	0.323411	1.33867e-06
CGTTGTTCGGAATCACTGGGCGTAAAGCGTACGTAGGCGGACTAATCAGTTGGGGGTGAAAGCCCGGAGCTTAACTCCGGAACTGCCTCCAATACTGTCAGTCTTGAGGTCGAGAGAGGTAAGTGGAATTCCAAGTGTAGAGGTGAAATTCGTAGATATTTGGAAGAACACCAGTGGCGAAGGCGACTTACTGGCTCGATTCTGACGCTGAGGTACGAAAGCG	EarlySummer	0.370283	3.25571e-09		Proteobacteria_5427			Bacteria	Proteobacteria		Alphaproteobacteria	Rhizobiales	Phyllobacteriaceae	Roseitalea	Roseitalea porphyridii		Roseitalea porphyridii						Early-Summer	Chlorophyll-a	0.386368	2.86e-06			Early-Summer	Summer	0.361539	5.23543e-08
CGTTAATCGGAATTACTGGGCGTAAAGCGCACGTAGGTGGTTTGGTAAGTCGGATGTGAAATCCCAGGGCTCAACCTTGGAATTGCATTCGATACTGCCTCACTAGAGTTTAGCAGAGGGATGGGGAATTCCGGGTGTAGCGGTGAAATGCGTAGAGATCCGGAGGAACATCAGTGGCGAAGGCGCCATCCTGGGCTAAAACTGACACTGAGGTGCGAAAGCG	EarlySummer	0.365724	5.22771e-09		Proteobacteria_4237			Bacteria	Proteobacteria		Gammaproteobacteria	Chromatiales	Woeseiaceae	Woeseia	Woeseia oceani		Woeseia oceani						Early-Summer	Chlorophyll-a	0.481674	2.22e-09			Early-Summer	Summer	0.557705	6.86109e-19
CGTTATCCGGAATTATTGGGCGTAAAGCGTCTGTAGGTGGCTTAGTAAGTCTACTGTTAAATACTAGGGCTTAACTCTGGAATGGCAGTGGAAACTACTAGGCTTGAGTACGGTAGAAGTAAAGGGAATTCCCAGTGTAGCGGTGAAATGCGTAGATATTGGGAAGAACACCAACGGCGAAAGCACTTTACTAGGCCGACACTGACACTAAGAGACGAAAGCT	EarlySummer	0.363454	6.60005e-09		Cyanobacteria_148			Bacteria	Cyanobacteria	Cyanobacteria/Melainabacteria group		Synechococcales					Synechococcales						Early-Summer	Fall/Winter	0.501889	3.58e-10			Early-Summer	Summer	0.293595	1.26318e-05
TTTTATTCGGAATTATTGGGCGTAAAGCGTCTGCAGGTTGACATAAAAGTCTTTTGTTAAATATCAGAGCTCAACTCGGAATCTGCAAAAGATACTATATGTCTTGAGTATGGTAGAGGTAAGGGGAATTTCCAGTGGAGCGGTGAAATGCGTAGATATTGGAAAGAACACCGATAGCGAAGGCACCTTACTGGGCCATTACTGACACTCAGAGACGAAAGCT	EarlySummer	0.358741	1.06456e-08		Cyanobacteria_140			Bacteria	Cyanobacteria	Cyanobacteria/Melainabacteria group		Synechococcales	Synechococcaceae	Synechococcus	Synechococcus sp. PCC 8807		Synechococcus sp. PCC 8807						Early-Summer	NA	NA	NA			Early-Summer	Summer	0.276685	4.05625e-05
TGTTATCCGGAATCACTGGGCGTAAAGCGTCTGTAGGTGGTTGTTTAAGTCAACTGTTAAATCTTGAGGCTCAACTTCAAAATCGCAGTCGAAACTATTCAACTAGAGTATAGTAGAGGTAAAGGGAATTCCCAGTGGAGCGGTGAAATGCGTAGATATTGGGAAGAACACCGATGGCGAAGGCACTTTACTGGGCTATTACTGACACTCAGAGACGAAAGCT	EarlySummer	0.356442	1.34039e-08		Cyanobacteria_160			Bacteria	Cyanobacteria	Cyanobacteria/Melainabacteria group													Early-Summer	Early-Summer	0.318778	0.000138606			Early-Summer	NA	NA	NA
TGTTATCCGGAATTATTGGGCGTAAAGCGTCTGCAGGTTGATCTATAAGTCTTTTGTCAAATCTTTGGGCTTAACCCAAAAACAGCAAAAGAAACTATTTATCTTGAGTATGGTAGAGGTAAGGGGAATTTCGAGTGGAGCGGTGAAATGCGTAGATATTCGAAAGAACACCAATAGCGAAGGCACCTTACTGGGCCATTACTGACACTCAGAGACGAAAGCT	EarlySummer	0.356405	1.3453e-08		Cyanobacteria_209			Bacteria	Cyanobacteria	Cyanobacteria/Melainabacteria group		Synechococcales	Prochlorotrichaceae	Halomicronema	Halomicronema hongdechloris	Halomicronema hongdechloris C2206	Halomicronema hongdechloris C2206						Early-Summer	Early-Summer	0.409045	6.32e-07			Early-Summer	Summer	0.23603	0.000497836
TGTTATCCGGAATCACTGGGCGTAAAGCGTCTGTAGGTGGTTTATTAAGTCTATTGTTAAAGCTTGAGGCTTAACTTCGAACCAGCAATAGAAACTGATAGACTGGAGTATAGTAGAGGTAAAAGGAATTTCCAGTGGAGCGGTGAAATGCGTAGATATTGGAAAGAACACCGATGGCGAAGGCATTTTACTGGGCTATAACTGACACTCAGAGACGAAAGCT	EarlySummer	0.354503	1.62566e-08		Cyanobacteria_160			Bacteria	Cyanobacteria	Cyanobacteria/Melainabacteria group													Early-Summer	Fall/Winter	0.213693	0.0118484			Early-Summer	Summer	0.146529	0.0321482
TGTTATCCGGAATCACTGGGCGTAAAGCGTCTGTAGGTGGTTTAGTAAGTCTGTTGTTAAAGCTTGGGGCTTAACCCCAAATCAGCAATGGAAACTACTAGACTTGAGTATGGTAGAGGTAAGAGGAATTTCCAGTGGAGCGGTGAAATGCGTAGATATTGGAAAGAACACCGATGGCGAAGGCATCTTACTGGGCCATTACTGACACTCAGAGACGAAAGCT	EarlySummer	0.337938	8.01875e-08		Cyanobacteria_210			Bacteria	Cyanobacteria	Cyanobacteria/Melainabacteria group		Synechococcales	Acaryochloridaceae	Acaryochloris	Acaryochloris marina	Acaryochloris marina MBIC11017	Acaryochloris marina MBIC11017						Early-Summer	NA	NA	NA			Early-Summer	Summer	0.314945	2.59617e-06
CGTTATCCGGCATGACTGGGCGTAAAGAGTCCGTAGACTGTAAAGTAAGTTTTTTGTTAAATTTTAAGACCCAATCTTAACACAGCAATTAATACTACTTTACTTTGAGTTTAATACAGAAAAGTGGAATTTTATACGATAAAGGTGAAATTTGTAGATATATAAAGGAACGTCAATAGCGAAGGCAACTTTTTGGTATAAACTGACGTTGAGGGACGAAAGCG	EarlySummer	0.331426	1.46461e-07		Proteobacteria_3590			Bacteria	Proteobacteria		Betaproteobacteria			Candidatus Nasuia	Candidatus Nasuia deltocephalinicola		Candidatus Nasuia deltocephalinicola						Early-Summer	Fall/Winter	0.45569	1.95e-08			Early-Summer	Summer	0.206096	0.00244665
TGTTATTCGAAATAACTGGGCGTAAAGGGTACGTAGGCGGTTTATTAAGTTAGTTTTCAAAGCCCTAAGCTCAACTTAGGTAAGGTAACTAATACTGTTAAACTAGAATAAGATAGAGGATAGTGGAATTTCTAATGGAGGGTTAAGTTCTGTAGATATTAGAAGGAACATCAGAGGCGAAGGCGACTATCTGGATCTTTATTGACGCTGAGGTACGAAGGCG	EarlySummer	0.326522	2.28423e-07		Proteobacteria_5209			Bacteria	Proteobacteria		Alphaproteobacteria	Rickettsiales	Anaplasmataceae	Neorickettsia			Neorickettsia						Early-Summer	Late-Summer	0.225219	0.00791035			Early-Summer	Summer	0.398719	1.43573e-09
CGTTAATCGGAATTACTGGGCGTAAAGAGTGCGTAGGCGGACAAGTAAGTCAGATGTGAAAGCCCTGGGCTCAACCTAGGAATGGCATTTGAAACTGCATGTCTAGAGCAGAAGAGAGGAGAGTAGAATTTCAGGTGTAGCGGTGAAATGCGTAGATATCTGAAGGAATACCAGTGGCGAAGGCGGCTCTCTGGTTTCATGCTGACGCTGAGGCACGAAAGCG	EarlySummer	0.325356	2.53602e-07		Proteobacteria_2642			Bacteria	Proteobacteria		Gammaproteobacteria	Thiotrichales	Piscirickettsiaceae	Cycloclasticus	Cycloclasticus sp. P1		Cycloclasticus sp. P1						Early-Summer	NA	NA	NA			Early-Summer	Summer	0.277101	3.94497e-05
CGTTATCCGGAATCATTGGGCGTAAAGCGTCTGTAGGTGGTTTTGTAAGTCCGCTGTAAAAGAGTACAGCTTAACTGTATATGGGCAGTGGAAACTACAAGACTGGAGTGTGGTAGGGGTAGAGGGAATTCCCGGTGTAGCGGTGAAATGCGTAGATATCGGGAAGAACACCAACGGCGAAAGCACTCTACTGGGCCAACACTGACACTGAGAGACGAAAGCT	EarlySummer	0.318209	4.76756e-07		Cyanobacteria_31			Bacteria	Cyanobacteria	Cyanobacteria/Melainabacteria group		Synechococcales	Leptolyngbyaceae	Leptolyngbya			Leptolyngbya						Early-Summer	Fall/Winter	0.276267	0.00103822			Early-Summer	NA	NA	NA
CGTTATCCGGAATCATTGGGCGTAAAGCGCCTGTAGGTTGTTTAATAAGTCTGTTGTTAAAGACTGGGGCTTAACCCCAGAAAAGCAATGGAAACTACTAGACTAGAGTATGGCAGGGGTAGAGGGAATTTCTAGTGTAGCGGTGAAATGCGTAGATATTAGAAAGAACACCGGTGGCGAAAGCGCTCTACTGGACCATTACTGACACTCAGAGGCGAAAGCT	EarlySummer	0.308213	1.12204e-06		Cyanobacteria_135			Bacteria	Cyanobacteria	Cyanobacteria/Melainabacteria group													Early-Summer	Late-Summer	0.330161	7.66e-05			Early-Summer	Summer	0.334682	5.36968e-07
TGTTATCCGGAATCACTGGGCGTAAAGCGTCTGTAGGTGGTTTAGTAAGTCTGTTGTTAAATCTCGAGGCTCAACTTCGAACCAGCAATAGAAACTACTAGACTTGAGTATGGTAGAGGTAAAAGGAATTTCCAGTGGAGCGGTGAAATGCGTAGATATTGGAAAGAACACCGATGGCGAAGGCATTTTACTGGGCCATGACTGACACTCAGAGACGAAAGCT	EarlySummer	0.301266	1.99696e-06		Cyanobacteria_148			Bacteria	Cyanobacteria	Cyanobacteria/Melainabacteria group		Synechococcales					Synechococcales						Early-Summer	NA	NA	NA			Early-Summer	Summer	0.258615	0.000130053
CGTTATCCGGAATGATTGGGCGTAAAGCGTTTGTAGGTGGTTTCGCCAGTCTATTGTTAAAGAGTACAGCTCAACTGTATAAAGGCAATAGAAACTACGAGGCTCGAGTGTGGTAGGGGCAGAGGGAATTCCCGGTGTAGCGGTGAAATGCGTAGATATCGGGAAGAACACCAAGAGCGAAAGCACTCTGCTGGGCCAACACTGACACTGAGAGACGAAAGCT	EarlySummer	0.286968	6.24684e-06		Cyanobacteria_128			Bacteria	Cyanobacteria	Cyanobacteria/Melainabacteria group		Oscillatoriales	Microcoleaceae	Limnospira	Limnospira fusiformis	Limnospira fusiformis SAG 85.79	Limnospira fusiformis SAG 85.79						Early-Summer	Winter/Spring	0.424966	2.04e-07			Early-Summer	Winter/Spring	0.371516	2.08408e-08
GGTTATTCACAATGATTGGGTGTAAAGCAGGACACGGTGATAAGTACAAGTGGAAAGCTTTCCGAGGGCCCAACCTAAGGAAAAGTATTCCAAACTAACTTGATAGAGGTTTGATAGAGTTGAAAGCGGAACTACTAGGGGAGAGGTGTAATTCGTTTTATCTTAGTAGGAACACCAAAAGCGAAAAGCAGCCAACAAATCAATACCTTCCACTATACCTGTAACCT	EarlySummer	0.283953	7.88331e-06		Fusobacteria_34			Bacteria	Fusobacteria		Fusobacteriia	Fusobacteriales	Leptotrichiaceae				Leptotrichiaceae						Early-Summer	Early-Summer	0.239962	0.00458518			Early-Summer	Summer	0.139001	0.042218
CGTTATCCGGAATCATTGGGCGTAAAGCGCCTGTAGGTTGTTTACTAAGTCTGTTGTTAAAGACTAGGGCTTAACCCTAGAAAAGCAATGGAAACTTGTAGACTAGAGTATGGCAGGGGTAGAGGGAATTTCTAGTGTAGCGGTGAAATGCGTAGATATTAGAAAGAACACCGGTGGCGAAAGCGCTCTACTGGACCATTACTGACACTCAGAGGCGAAAGCT	EarlySummer	0.282035	9.12809e-06		Cyanobacteria_135			Bacteria	Cyanobacteria	Cyanobacteria/Melainabacteria group													Early-Summer	Early-Summer	0.3559	1.84e-05			Early-Summer	Summer	0.264153	9.18017e-05
TGTTATCCGGAATCACTGGGCGTAAAGCGTCTGTAGGTTGTTGTTTAAGTCAACTGTTAAATCTTGAGGCTCAACCTCGAAATCGCAGTCGAAACTATTCAACTTGAGTATAGTAGGGGTAAAGGGAATTTCCAGTGGAGCGGTGAAATGCGTAGAGATTGGAAAGAACACCGATGGCGAAGGCACTTTACTGGGCTATTACTGACACTCAGAGACGAAAGCT	EarlySummer	0.280263	1.04424e-05		Cyanobacteria_151			Bacteria	Cyanobacteria	Cyanobacteria/Melainabacteria group		Chroococcales	Chroococcaceae	Geminocystis	Geminocystis sp. NIES-3709		Geminocystis sp. NIES-3709						Early-Summer	Early-Summer	0.429287	1.49e-07			Early-Summer	Summer	0.192025	0.00481874
CGTTATCCGGATTTATTGGGTTTAAAGGGTCCGTAGGCGGGTTATTAAGTCAGTGGTGAAATCCTACAGCTCAACTGTAGAACTGCCATTGAAACTGATAACCTTGAGTATAATTGAAGTGGGCGGAATGTGTCATGTAGCGGTGAAATGCTTAGATATGACACAGAACACCGATTGCGAAGGCAGCTCACTAAGTTATAACTGACGCTGAGGGACGAAAGCG	EarlySummer	0.276549	1.38016e-05		Bacteroidetes_518			Bacteria	Bacteroidetes	FCB group	Flavobacteriia	Flavobacteriales	Schleiferiaceae	Owenweeksia	Owenweeksia hongkongensis	Owenweeksia hongkongensis DSM 17368	Owenweeksia hongkongensis DSM 17368						Early-Summer	Early-Summer	0.379175	4.51e-06			Early-Summer	Summer	0.202009	0.00299261
CGTTATCCGGAATCATTGGGCGTAAAGCGTCTGTAGGTGGCCAGGTAAGTCGACTGTTAAAGGGCCCAGCTTAACTGGGTATAGGCAGTCGAAACTACTTGGCTTGAGTGTGGTAGGGGTAGAGGGAATTCCCGGTGTAGCGGTGAAATGCATAGAGATCGGGAAGAACACCAATGGCGAAAGCACTCTGCTGGGCCAACACTGACACTGAGAGACGAAAGCT	EarlySummer	0.276509	1.38434e-05		Cyanobacteria_119			Bacteria	Cyanobacteria	Cyanobacteria/Melainabacteria group		Oscillatoriales	Gomontiellaceae	Crinalium	Crinalium epipsammum	Crinalium epipsammum PCC 9333	Crinalium epipsammum PCC 9333						Early-Summer	NA	NA	NA			Early-Summer	Summer	0.284321	2.41747e-05
CGTTATCCGGAATCACTGGGCATAAAGCGTCTGTAGGTTGTTTAGTAAGTCTGCTGTTAAATACTAGGGCTTAACCCTAGGCCAGCAGTGGAAACTGCTAGACTTGAGTGTGGTAGAGGTAGAGGGAATTCCTAGTGTAGCGGTGAAATGCGTAGATATTAGGAAGAACACCAATGGCGAAGGCACTCTACTGGGCCATAACTGACACTGAGAGACGACAGCT	EarlySummer	0.271204	2.04747e-05		Cyanobacteria_154			Bacteria	Cyanobacteria	Cyanobacteria/Melainabacteria group		Chroococcales					Chroococcales						Early-Summer	Late-Summer	0.2189	0.00989528			Early-Summer	Summer	0.235367	0.000516869
CGTTACTCGGATTTATTGGGCGTAAAGAGTGCGTAGGCTGATTTATAAGTTAAAAGTGAAATCCTTTAGCTCAACTAAAGAACTGCTTTTAAGACTGTAAAACTAGAGTTTAGTAAAAGATAGAAGAATTTTCAATGTAGAGGTGAAATTCATAGATATTGAAAGGAATGCCAAAAGCGAAAGCATCTATCTGAGAAAAAACTGACGCTGTTGCACGAAAGCG	EarlySummer	0.269876	2.25549e-05		Proteobacteria_5120			Bacteria	Proteobacteria		Alphaproteobacteria	Rickettsiales	Candidatus Midichloriaceae	Candidatus Midichloria	Candidatus Midichloria mitochondrii	Candidatus Midichloria mitochondrii IricVA	Candidatus Midichloria mitochondrii IricVA						Early-Summer	NA	NA	NA			Early-Summer	Summer	0.227717	0.000791071
CGTTATCCGGAATCATTGGGTTTAAAGGGTCCGCAGGCGGTTTTTTAAGTCAGAGGTGAAAGCCAACAGCTCAACTGTTGAACTGCCTTTGATACTGAAAGACTTGAGTCATTGTGAAGTGGTTAGAATGTGTGGTGTAGCGGTGAAATGCTTAGATATCACACAGAATACCCATTGCGAAGGCAGATCACTAACAATGTACTGACGCTCATGGACGAAAGCG	EarlySummer	0.269708	2.28311e-05		Bacteroidetes_975			Bacteria	Bacteroidetes	FCB group	Flavobacteriia	Flavobacteriales	Flavobacteriaceae	Kordia			Kordia						Early-Summer	Spring	0.476156	3.57e-09			Early-Summer	Summer	0.264467	8.999e-05
TGTTACTCGCAATGACTGGGCGTAAAGCGTACGTAGGCGGTTTGATTTTAGGTTCTTTGCGAAAGTCTAGGACTCAACCTTAGTGTGACTTTTAACGTATCAAACTAGAGTTTAGTAGAGGTCAGCGGAATTTTCAGATTAGGGATAAAATCCAAGGAAACTGAAAGGAACACCACAACAATTAGCGAAGGCAGCTGTCTGGGCTAAACTGACGCTAAAGTACGGAAGCG	EarlySummer	0.245941	0.000118361		phylum_reps_2497																		Early-Summer	Early-Summer	0.3055	0.000268778			Early-Summer	Summer	0.260719	0.000114041
TGTTATTCGGAATAATTGGGCGTAAAGGGCGCGTAGGCGGGTGTTTGCAGTTGTTTGTGACAGCCCAAGGCTCACCCTTGGTTTTGCAGACAAAACGACACACCTCGAGTCTGAAAGAGGAGACCAGAATTTCTAGTGGAGAGGTTAAATTCTTAGAGATTAGAAGGAATACCAAAAGCGAAGGCAAGTCTCTGGTTCATGACTGACGCTGAGGCGCGAAAGCG	EarlySummer	0.232153	0.000286275		Proteobacteria_5170			Bacteria	Proteobacteria		Alphaproteobacteria	Rickettsiales	Anaplasmataceae	Wolbachia			Wolbachia						Early-Summer	NA	NA	NA			Early-Summer	NA	NA	NA
CGTTATCCGGAATCATTGGGTGTAAAGCGTCTGTAGGTTGTTTATTTAAGTCAGCTGTTAAATTTCAAAACTCAATTTTGATAATCGCATCTGAAACTAATAAACTAGAGTTGAGTAGAGGCAGAAGGAACTCCGAGTGTAGCGGTGAAATGCGTAGATATTCGGAAGAACACCGATGGCGAAAGCATTCTGCTGGGCTTGTACTGACACTGAGAGACGAAAGCG	EarlySummer	0.231052	0.000306526		Firmicutes_Tenericutes_884			Bacteria	Tenericutes	Terrabacteria group	Mollicutes	Mycoplasmatales	Mycoplasmataceae				Mycoplasmataceae						Early-Summer	Early-Summer	0.284939	0.000705764			Early-Summer	Summer	0.247518	0.000255444
CGTTACTCGGATTCACTGGGCGTAAAGGGTGCGTAGGCCGCTAAGCGTGTCGGGTGTGAAATCTCGGGGCTCAACCTCGAAACTGCGCCCGAAACTGTTTAGCTAGAGTGTCGGAGAGGTAAGCGGAATTCCAGGTGTAGCGGTGAAATGCGTAGATATCTGGAGGAACACCAATGGCGAAGGCAGCTTACTGGACGACAACTGACGCTGAGGCACGAAAGCA	EarlySummer	0.22841	0.00036066		Verrucomicrobia_5			Bacteria	Verrucomicrobia	PVC group	Opitutae	Puniceicoccales	Puniceicoccaceae	Coraliomargarita	Coraliomargarita akajimensis	Coraliomargarita akajimensis DSM 45221	Coraliomargarita akajimensis DSM 45221						Early-Summer	Chlorophyll-a	0.472321	4.96e-09			Early-Summer	Summer	0.26939	6.55734e-05
CGTTACTCGGATTCACTGGGCGTAAAGGGTGCGTAGGCCGCTAAGTGTGTCAGGTGTGAAATCTCGGGGCTCAACCTCGAAACTGCGCCTGAAACTACTTAGCTTGAGTTTCGGAGAGGTAAGCGGAATTTCTGGTGTAGCGGTGAAATGCGTAGATATCAGAAGGAACACCAATGGCGAAGGCAGCTTACTGGACGACAACTGACGCTGAGGCACGAAAGCG	EarlySummer	0.22505	0.000442354		Verrucomicrobia_5			Bacteria	Verrucomicrobia	PVC group	Opitutae	Puniceicoccales	Puniceicoccaceae	Coraliomargarita	Coraliomargarita akajimensis	Coraliomargarita akajimensis DSM 45221	Coraliomargarita akajimensis DSM 45221						Early-Summer	NA	NA	NA			Early-Summer	Summer	0.222222	0.00106486
CGTTGTTCGGAATTACTGGGCGTAAAGAGCGCGTAGGCGGCTTGTCAAGTTGGAAGTGAAATCCCGGAGCTCAACTCCGGAACTGCTTTCAAAACTGACTAGCTTGAGTTATGTAGAGGATAGTGGAATTCCCAATGTAGAGGTGAAATTCGTAGATATTGGGAGGAACACCAGAAGCGAAGGCGACTATCTGGGCATATACTGACGCTGAGGCGCGAAAGTG	EarlySummer	0.221996	0.000531161		Proteobacteria_5125			Bacteria	Proteobacteria		Alphaproteobacteria						Alphaproteobacteria						Early-Summer	NA	NA	NA			Early-Summer	NA	NA	NA
TGTTATTCGGAATGACTAGGCGTAAAGCGCACATAGGCTGTTTTTTTAGTTGAAATTTAAATTAGAAAGCTTAACTTTTATAATGGTTTCAATACTGATAAACTAGAGTAAGAATAGAGGATAGTGGAATTTTTAATAAAGAGTTGAAATTCATCGACATTAGAAGGAAGGCCAATTGCGAAGGCAGCTATCTAGCTCTTAACTGACGCTGTTGTGCGAAAGCA	EarlySummer	0.213857	0.000854766		Proteobacteria_5121			Bacteria	Proteobacteria		Alphaproteobacteria	Rickettsiales	Candidatus Midichloriaceae	Candidatus Fokinia	Candidatus Fokinia solitaria		Candidatus Fokinia solitaria						Early-Summer	Early-Summer	0.257294	0.00231536			Early-Summer	Summer	0.156487	0.022026
TGTTATCCGGAATCACTGGGCGTAAAGCGTCTGTAGGTTGTTGAACAAGTCAACTGTTAAATCTTGAGGCTCAACTTCAAAATCGCAGTCGAAACTGTTTGACTAGAGTATAGTAGGGGTAAAGGGAATTTCCAGTGGAGCGGTGAAATGCGTAGATATTGGAAAGAACACCGATGGCGAAGGCACTTTACTGGGCTATTACTGACACTCAGAGACGAAAGCT	EarlySummer	0.201982	0.00165952		Cyanobacteria_160			Bacteria	Cyanobacteria	Cyanobacteria/Melainabacteria group													Early-Summer	Early-Summer	0.428926	1.53e-07			Early-Summer	Summer	0.287838	1.89512e-05
CGTTATTCGGAATTACTGGGCTTAAAGGGTGCGTAGGCTGCACGGAAAGTTGGGTGTGAAAGCCCTCAGCTCAACTGAGGAATTGCATCCAAAACTGCCGTGCTTGAGGGAGACAGAGGTGAGCGGAACTCAAGGTGGAGCGGTGAAATGCGTTGATATCTTGAGGAACACCGGTGGCGAAGGCGGCTCACTGGGTCTCTTCTGACGCTGAGGCACGAAAGCT	EarlySummer	0.19382	0.00256453		Planctomycetes_59			Bacteria	Planctomycetes	PVC group	Planctomycetia						Planctomycetia						Early-Summer	Chlorophyll-a	0.339072	4.74e-05			Early-Summer	Chl-a	0.276902	3.99782e-05
CGTTATCCGGATTTATTGGGTTTAAAGGGTGCGTAGGCGGGGCAATAAGTCAGTGGTGAAATCTTCCAGCTTAACTGGGAAACTGCCATTGATACTGTTGTTCTTGAGTTTGGTTGAAGTAGGCGGAATGAGGCATGTAGCGGTGAAATGCATAGATATGCCTCAGAACACCGATTGCGAAGGCAGCTTACTAAGCCAATACTGACGCTGAGGCACGAAAGCG	EarlySummer	0.193289	0.00263665		Bacteroidetes_1150			Bacteria	Bacteroidetes	FCB group	Flavobacteriia	Flavobacteriales					Flavobacteriales						Early-Summer	Chlorophyll-a	0.244852	0.00379897			Early-Summer	Chl-a	0.256608	0.000147273
TGTTATCCGGAATTACTGGGCGTAAAGCGTCTGTAGGTGGTTTAGTAAGTCTACTGTTAAATCTTGAAGCTTAACTTCGAAACCGCAGGAGATACTGCTAGACTAGAGTATATTTGGAGCAGAAGGAATTTCTAGTGAAGCGGTGAAATGCGTAGATATTAGAAGGACCATCAAAGGCGAAAGCATTCTGTTAAGGTATCACTGACACTCAGAGACGAAAGCT	EarlySummer	0.192247	0.00278357		Cyanobacteria_114			Bacteria	Cyanobacteria	Cyanobacteria/Melainabacteria group		Nostocales					Nostocales						Early-Summer	NA	NA	NA			Early-Summer	NA	NA	NA
GGTTATTCATAATGATTGGGTGTAAAGCAGGACACGGTGATAAGTACAAGTGGAATGCTTTCCGAGGGCTCAACCTAAGGAAAAGTATTCCAAACTAACTTGATTGAGGTTTGATAAAGTTGAAAGCGGAACTACTAGGGGAGAGGTGTAATTCGTTTTATCTTAGTAGGAACACCAAAGGCGAAAAGCAGCCAACAAATCAACACCTTCCACTATACCTGTAACCT	EarlySummer	0.171512	0.00774611		Fusobacteria_34			Bacteria	Fusobacteria		Fusobacteriia	Fusobacteriales	Leptotrichiaceae				Leptotrichiaceae						Early-Summer	NA	NA	NA			Early-Summer	Summer	0.182897	0.00730623
CGTTATCCGGATTTATTGGGCGTAAAGCGCCTGTAGGTTGTTTAATAAGTCTGTTGTTAAAGACTAGGGCTTAACCCTGGGAAAGCAATGGAAACTAATAAACTTGAGTATGGCAGGGGTAGAGGGAATTTCTAGTGTAGCGGTGAAATGCGTAGATATTAGAAAGAACACCGGTGGCGAAAGCGCTCTACTGGACCATTACTGACACTCAGAGGCGAAAGCT	EarlySummer	0.170849	0.00798991		Cyanobacteria_135			Bacteria	Cyanobacteria	Cyanobacteria/Melainabacteria group													Early-Summer	NA	NA	NA			Early-Summer	Summer	0.151417	0.0267703
CGTTAATCGGAATTACTGGGCGTAAAGGGTGCGTAGGCGGTTAATTAAGTCAGATGTGAAATCCCCGGGCTCAACCTGGGAACTGCATTTGAAACTGGTTAGCTAGAGTTATGTAGAGGGAGGTAGAATTTCAGGTGTAGCGGTGAAATGCGTAGAGATCTGAAGGAATACCGGTGGCGAAGGCGACCTCCTGGACAATAACTGACGCTGAGGCACGAAAGCG	EarlySummer	0.163895	0.0109901		Proteobacteria_7858			Bacteria	Proteobacteria	ant endosymbionts	Gammaproteobacteria	Enterobacterales	Enterobacteriaceae	Candidatus Blochmannia			Candidatus Blochmannia						Early-Summer	NA	NA	NA			Early-Summer	Summer	0.246578	0.000270114
CATTATCAATTATAACTGGGTGTAAAACGTTTGATGATTGTAGCAAGGAATGTTTAATTTATAATATTACTAAATTTGTAATCTGGATTAATAACTCTGTTACTTGAATTTTTTCAAAGAAAATAAAATTAGCTAATTAAGTGTGAAAACTGATTATGTAGTTAGGAGTATCAATTGCGAAGGCAATTTTCTTGTTTAAATTGACATTATAAAACGAAAGCC	EarlySummer	0.138723	0.0316931		Proteobacteria_3590			Bacteria	Proteobacteria		Betaproteobacteria			Candidatus Nasuia	Candidatus Nasuia deltocephalinicola		Candidatus Nasuia deltocephalinicola						Early-Summer	NA	NA	NA			Early-Summer	NA	NA	NA
CGTTGTTCGGAATTACTGGGCGTAAAGCGCATGTAGGCGGAACAAAAAGTTAGAAGTGAAATCCCTGGGCTCAACCTAGGAATTGCTTTTAAAACTTTTGTTCTGGAATTCAGGAGAGGAAAATGGAATTTCCAGTGTAGAGGTGAAATTCGTAGATATTGGAAGGAACACCAGTGGCGAAGGCGATTTTCTGGACTGATATTGACGCTGAGATGCGAAGGCA	Late-Summer	0.842558	6.7507e-66		Proteobacteria_6148			Bacteria	Proteobacteria		Alphaproteobacteria	Caulobacterales	Caulobacteraceae				Caulobacteraceae						Late-Summer	Late-Summer	0.797108	1.37e-31			Late-Summer	Summer	0.810846	3.2079e-51
CGTTGTTCGGAATTACTGGGCGTAAAGCGCGCGTAGGCGGATTAGAAAGTTGGGGGTGAAATCCCGGGGCTCAACCCCGGAACTGCCTCCAAAACTGCTAGTCTAGAGTTCGAGAGAGGTGAGTGGAATTCCGAGTGTAGAGGTGAAATTCGTAGATATTCGGAGGAACACCAGTGGCGAAGGCGGCTCACTGGCTCGATACTGACGCTGAGGTGCGAAAGTG	Late-Summer	0.822003	3.9976e-60		Proteobacteria_5946			Bacteria	Proteobacteria		Alphaproteobacteria	Rhodobacterales	Rhodobacteraceae	Sagittula	Sagittula sp. P11		Sagittula sp. P11						Late-Summer	Late-Summer	0.751593	2.4e-26			Late-Summer	Summer	0.758115	3.12285e-41
CGTTATCCGGAATCACTGGGTTTAAAGGGTGCGTAGGCGGCACAATAAGTCAGAAGTGAAATGCTGTAGCTTAACTATGGAATTGCTTTTGATACTGTTGAGCTTGAATTGGGTTGAGGTTAGCGGAATGAGTCATGTAGCGGTGAAATGCATAGATATGACTTAGAACACCAATTGCGAAGGCAGCTAACTGGGCCTTGATTGACGCTGAGGCACGAAAGCG	Late-Summer	0.814736	2.93228e-58		Bacteroidetes_224			Bacteria	Bacteroidetes	FCB group	Saprospiria	Saprospirales	Saprospiraceae	Saprospira	Saprospira grandis	Saprospira grandis str. Lewin	Saprospira grandis str. Lewin						Late-Summer	Late-Summer	0.528454	2.71e-11			Late-Summer	NA	NA	NA
CGTTATCCGGAATTATTGGGCGTAAAGCGTCCGCAGGCGGCCCTTCAAGTCTGCTGTTAAAAAGTGGAGCTTAACTCCATCATGGCAGTGGAAACTGTTGGGCTTGAGTGTGGTAGGGGCAGAGGGAATTCCCGGTGTAGCGGTGAAATGCGTAGATATCGGGAAGAACACCAGTGGCGAAGGCGCTCTGCTGGGCCATCACTGACGCTCATGGACGAAAGCC	Late-Summer	0.809687	5.19461e-57		Cyanobacteria_265			Bacteria	Cyanobacteria	Cyanobacteria/Melainabacteria group		Synechococcales	Synechococcaceae	Synechococcus	Synechococcus sp. RS9902		Synechococcus sp. RS9902						Late-Summer	Late-Summer	0.795843	1.99e-31			Late-Summer	Summer	0.734985	1.26542e-37
CGTTGTCCGGATTTATTGGGTTTAAAGGGTACGTAGGCGGGACTTTAAGTCAGTGGTGAAAGCCTCCAGCTTAACTGGAGAATTGCCATTGAAACTGAAGTTCTTGAGTATGGATGAGGTGGTTGGAATATAACATGTAGCGGTGAAATGCATAGATATGTTATAGAACACCAATTGCGAAGGCAGATCACTAAACCATTACTGACGCTGAGGTACGAAAGCG	Late-Summer	0.789249	2.57827e-52		Bacteroidetes_518			Bacteria	Bacteroidetes	FCB group	Flavobacteriia	Flavobacteriales	Schleiferiaceae	Owenweeksia	Owenweeksia hongkongensis	Owenweeksia hongkongensis DSM 17368	Owenweeksia hongkongensis DSM 17368						Late-Summer	Late-Summer	0.783677	6.53e-30			Late-Summer	Summer	0.780865	3.36238e-45
CGTTGTTCGGATTTACTGGGCGTAAAGCGTCTGTAGGCGGAGTGGTAAGTCAGATGTGAAATCCCGGGGCTCAACCCCGGAACTGCATCCGATACTGCCACCCTAGAGGGTCGGAGGGGAGTCTGGAATTCTCGGTGTAGCAGTGAAATGCGTAGATATCGAGAGGAACACTAGTGGCGAAGGCGAGACTCTGGACGACACCTGACGCTGAGAGACGAAGGCC	Late-Summer	0.779403	3.0997e-50		Verrucomicrobia_27			Bacteria	Verrucomicrobia	PVC group	Verrucomicrobiae	Verrucomicrobiales					Verrucomicrobiales						Late-Summer	Late-Summer	0.601552	6.08e-15			Late-Summer	Summer	0.641488	3.31712e-26
CGTTGTCCGGATTTATTGGGCGTAAAGAGCTCGTAGGCGGTTCTGTAAGTCGGATGTGAAAACTCAGGGCTCAACCCTGAGACGCCATCTGATACTGCAGTGACTAGAGTCCGGTAGAGGAAGATGGAATTCCTGGTGTAGCGGTGGAATGCGCAGATATCAGGAGGAACACCAATGGCGAAGGCAGTCTTCTGGGCCGGTACTGACGCTGAGGAGCGAAAGCA	Late-Summer	0.779277	3.29046e-50		Actinobacteria_177			Bacteria	Actinobacteria	Terrabacteria group	Acidimicrobiia	Acidimicrobiales					Acidimicrobiales						Late-Summer	Late-Summer	0.616526	8.26e-16			Late-Summer	Summer	0.630546	4.02029e-25
CGTTATCCGGAATCACTGGGTTTAAAGGGTGCGTAGGCGGCAAAATAAGTCAGAGGTGAAAGCCCGGCGCTCAACGTCGGAATTGCCTTTGATACTGTTATGCTTGAATCATGTTGAGGTCGGCGGAATGAGTCATGTAGCGGTGAAATGCATAGATATGACTTAGAACACCAATTGCGAAGGCAGCTGGCTGGATATGAATTGACGCTGAGGCACGAAAGCG	Late-Summer	0.776097	1.46453e-49		Bacteroidetes_223			Bacteria	Bacteroidetes	FCB group	Saprospiria	Saprospirales	Haliscomenobacteraceae	Haliscomenobacter	Haliscomenobacter hydrossis	Haliscomenobacter hydrossis DSM 1100	Haliscomenobacter hydrossis DSM 1100						Late-Summer	Late-Summer	0.586014	4.33e-14			Late-Summer	Summer	0.692385	7.00586e-32
CGTTGTTCGGAATAACTGGGCGTAAAGCGTGTGTAGGCTGCGCGGAAAGTCAAATGTGAAAGCCAAGGGCTCAACCCTTGAACTGCATTCGATACTCCCGTGCTAGAGTAATGGAGAGGTAAGTGGAATTCCTGGTGTAGCAGTGAAATGCGTGGATATCAGGAGGAACATCAATGGCGAAGGCAACTTACTGGACATTTACTGACGCTCAGACACGAAGGCT	Late-Summer	0.770795	1.67385e-48		Verrucomicrobia_24			Bacteria	Verrucomicrobia	PVC group	Verrucomicrobiae	Verrucomicrobiales	Verrucomicrobiaceae	Luteolibacter	Luteolibacter luteus		Luteolibacter luteus						Late-Summer	Late-Summer	0.723763	1.15e-23			Late-Summer	Summer	0.79918	9.32941e-49
CGTTGTTCGGAATTACTGGGCGTAAAGCGCGCGTAGGCGGATTAGAAAGTTGGGGGTGAAATCCCGGGGCTCAACCTCGGAACTGCCTCCAAAACTGCTAGTCTAGAGTTCGAGAGAGGTGAGTGGAATTCCGAGTGTAGAGGTGAAATTCGTAGATATTCGGAGGAACACCAGTGGCGAAGGCGGCTCACTGGCTCGATACTGACGCTGAGGTGCGAAAGTG	Late-Summer	0.761358	1.09172e-46		Proteobacteria_5952			Bacteria	Proteobacteria		Alphaproteobacteria	Rhodobacterales	Rhodobacteraceae				Rhodobacteraceae						Late-Summer	Late-Summer	0.699344	1.43e-21			Late-Summer	Summer	0.823916	3.42081e-54
CGTTATCCGGATTTATTGGGTTTAAAGGGTCCGTAGGCGGGACATTAAGTCAGTGGTGAAAGCCTTCAGCTTAACTGGAGAATTGCCATTGATACTGATGTCCTTGAGTACACCTGAAGTGGGCGGAATGTGTCATGTAGCGGTGAAATGCATAGATATGACACAGAACACCGATTGCGAAGGCAGCTCACTAAAGTGTAACTGACGCTGAGGGACGAAAGCG	Late-Summer	0.743091	2.09684e-43		Bacteroidetes_518			Bacteria	Bacteroidetes	FCB group	Flavobacteriia	Flavobacteriales	Schleiferiaceae	Owenweeksia	Owenweeksia hongkongensis	Owenweeksia hongkongensis DSM 17368	Owenweeksia hongkongensis DSM 17368						Late-Summer	Late-Summer	0.560075	9.19e-13			Late-Summer	Summer	0.612102	2.16653e-23
CGTTGTCCGGATTTATTGGGCGTAAAGAGCTCGTAGGCGGTTAGTCACGTCGGATGTGAAATCCCAGTGCTTAACACTGGGCCTGCATTCGATACGGGCTGACTAGAGTGTTGTAGGGGAGACTGGAACTCCTGGTGTAGCGGTGAAATGCGCAGATATCAGGAAGAACACCGGTGGCGAAGGCGGGTCTCTGGGCAACTACTGACGCTGAGGAGCGAAAGCG	Late-Summer	0.734519	5.86166e-42		Actinobacteria_628			Bacteria	Actinobacteria	Terrabacteria group	Actinobacteria	Acidothermales	Acidothermaceae	Acidothermus	Acidothermus cellulolyticus	Acidothermus cellulolyticus 11B	Acidothermus cellulolyticus 11B						Late-Summer	Late-Summer	0.507756	2.06e-10			Late-Summer	Summer	0.549785	2.65961e-18
CGTTACGCGGAATTACTGGGCTTAAAGCGTACGTAGGCGGATCTACAGGTATCCTGTGAAAGCCCACGGCTCAACCGTGGAATTGCAGGGTAAACCGTAGATCTTGAGGTGGCTAGGGGCTCTCGGAACGGTAGGTGGAGTGGTGAAATGCGTTGATATCTACCGGAACGCCAAAGGGGAAGCCAGGGAGCTGGGGCCATTCTGACGCTGAGGTACGAAAGCG	Late-Summer	0.728918	4.82047e-41		Planctomycetes_35			Bacteria	Planctomycetes	PVC group	Phycisphaerae	Phycisphaerales	Phycisphaeraceae	Phycisphaera	Phycisphaera mikurensis	Phycisphaera mikurensis NBRC 102666	Phycisphaera mikurensis NBRC 102666						Late-Summer	Early-Summer	0.436875	8.46e-08			Late-Summer	Summer	0.682861	9.8901e-31
CGTTAATCGGAATTACTGGGCGTAAAGCGCGCGTAGGTGGTCTGTTAAGTCGGATGTGAAAGCCCCGGGCTCAACCTGGGAACTGCATCCGATACTGGCAGACTAGAGTGCGGGAGAGGGAGGTAGAATTCCACGTGTAGCGGTGAAATGCGTAGATATGTGGAGGAATACCAGTGGCGAAGGCGGCCTCCTGGCTCGACACTGACACTGAGGTGCGAAAGCG	Late-Summer	0.719226	1.63613e-39		Proteobacteria_1588			Bacteria	Proteobacteria		Gammaproteobacteria	Cellvibrionales	Halieaceae	Kineobactrum	Kineobactrum salinum		Kineobactrum salinum						Late-Summer	Late-Summer	0.777371	3.65e-29			Late-Summer	Summer	0.685361	4.98495e-31
CGTTATCCGGAATTATTGGGCGTAAAGCGTCCGCAGGCGGCCTGACAAGTCTGCTGTTAAAGCGTGGAGCTTAACTCCATTTCAGCAGTGGAAACTGTCAGGCTTGAGTGTGGTAGGGGCAGAGGGAATTCCCGGTGTAGCGGTGAAATGCGTAGATATCGGGAAGAACACCAGTGGCGAAAGCGCTCTGCTGGGCCATCACTGACGCTCATGGACGAAAGCC	Late-Summer	0.70811	7.79327e-38		Cyanobacteria_221			Bacteria	Cyanobacteria	Cyanobacteria/Melainabacteria group		Synechococcales	Synechococcaceae	Synechococcus	Synechococcus sp. Minos11		Synechococcus sp. Minos11						Late-Summer	Late-Summer	0.705438	4.48e-22			Late-Summer	Summer	0.597053	4.64296e-22
CGTTATCCGGAATTATTGGGTTTAAAGGGTCCGCAGGCTGTTTGCTAAGTCAGGGGTGAAATCCTACCGCTCAACGGTAGAACTGCCTTTGATACTGGCAAACTTGAGTTATTGTGAAGTAGTTAGAATGTGTAGTGTAGCGGTGAAATGCATAGATATTACACAGAATACCAATTGCGAAGGCAGATTACTAACAATTAACTGACGCTGAGGGACGAAAGCG	Late-Summer	0.68463	1.54648e-34		Bacteroidetes_994			Bacteria	Bacteroidetes	FCB group	Flavobacteriia	Flavobacteriales	Flavobacteriaceae	Siansivirga	Siansivirga zeaxanthinifaciens	Siansivirga zeaxanthinifaciens CC-SAMT-1	Siansivirga zeaxanthinifaciens CC-SAMT-1						Late-Summer	Late-Summer	0.417664	3.46e-07			Late-Summer	Summer	0.545305	5.63384e-18
CGTTGTTCGGAATTACTGGGCGTAAAGGGCGTGTAGGCGGACGATCAAGCTAGAGGTGAAAGCCCAGGGCCCAACCCTGGAACTGCCTTTAGAACTGATTGTCTAGAATCCGTAAGGGGAGTGTGGAATTCCTAGTGTAGAGGTGAAATTCGTAGATATTAGGAAGAACACCAGTGGCGAAGGCGGCACTCTGGTACGGTATTGACGCTGAGGCGCGAAAGCG	Late-Summer	0.680535	5.40698e-34		Proteobacteria_6155			Bacteria	Proteobacteria		Alphaproteobacteria	Emcibacterales	Emcibacteraceae	Emcibacter			Emcibacter						Late-Summer	Late-Summer	0.460329	1.34e-08			Late-Summer	Summer	0.481309	8.28199e-14
CGTTGTTCGGAATCATTGGGCGTAAAGCGCGCGTAGGCGGCCAGTTAGGTCGGGTGTGAAATCCCGGGGCTCAACCTCGGAACTGCGCTCGAAACCGGCTGGCTTGAGTCCCAGAGGGAGAAGTGGAATTCCTGGTGTAGGGGTGAAATCCGTAGATATCAGGAGGAACACCAGTGGCGAAGGCGACTTCTTGGCTGAGGACTGACGCTGAGGTGCGAAAGCG	Late-Summer	0.676946	1.59218e-33		Proteobacteria_4405			Bacteria	Proteobacteria		Oligoflexia						Oligoflexia						Late-Summer	Late-Summer	0.470114	5.97e-09			Late-Summer	Summer	0.584163	5.65648e-21
CGTTGTTCGGAATTACTGGGCGTAAAGGGCGCGTAGGCGGCTCTTTAAGTTAGGCGTGAAATCCCCGGGCTCAACCTGGGAACTGCGCTTAAGACTGGAGAGCTAGAAAACGGAAGAGGGTAGTGGAATTCCCAGTGTAGAGGTGAAATTCGTAGATATTGGGAAGAACACCAGTGGCGAAAGCGGCTACCTGGTCCGGATTTGACGCTGAGGCGCGAAAGCG	Late-Summer	0.660415	1.90429e-31		Proteobacteria_6566			Bacteria	Proteobacteria	SAR116 cluster	Alphaproteobacteria			Candidatus Puniceispirillum	Candidatus Puniceispirillum marinum	Candidatus Puniceispirillum marinum IMCC1322	Candidatus Puniceispirillum marinum IMCC1322						Late-Summer	Early-Summer	0.429773	1.44e-07			Late-Summer	Summer	0.648963	5.68944e-27
CGTTATCCGGATTTATTAGGTTTAAAGGGTCCGCAGGCGGGATTTTAAGTCAGTGGTGAAAGCCTACAGCTCAACTGTAGAACTGCCATTGATACTGATATCCTTGAGTGTGGTTGAAGTGGGCGGAACATGTCATGTAGCGGTGAAATGCATAGATATGACATAGAACACCAATTGCGAAGGCAGCTCACTAAGCCATTACTGACGCTGAGGGACGAAAGCG	Late-Summer	0.643125	2.07284e-29		Bacteroidetes_518			Bacteria	Bacteroidetes	FCB group	Flavobacteriia	Flavobacteriales	Schleiferiaceae	Owenweeksia	Owenweeksia hongkongensis	Owenweeksia hongkongensis DSM 17368	Owenweeksia hongkongensis DSM 17368						Late-Summer	Late-Summer	0.519661	6.52e-11			Late-Summer	Summer	0.512509	9.89687e-16
CGTTATCCGGATTTACTGGGTTTAAAGGGTGCGCAGGCGGTCTATTAAGTCAGTGGTGAAAGCCCGGGGCTCAACTCCGGAACTGCCATTGATACTGATAGACTTGAGTTTGGGAGAGGTAGGCGGAATACAGCATGTAGCGGTGAAATGCATAGATATGCTGTAGAACACCAATTGCGAAGGCAGCTTACTATACCAATACTGACGTTCAGGCACGAAAGCG	Late-Summer	0.638336	7.20744e-29		Bacteroidetes_273			Bacteria	Bacteroidetes	FCB group							FCB group						Late-Summer	Late-Summer	0.430246	1.39e-07			Late-Summer	Summer	0.506363	2.45392e-15
CGTTATCCGGATTCATTGGGTTTAAAGGGTCCGTAGGCGGATTTTTAAGTCAGTGGTGAAAGCCGGCAGCTCAACTGTCGAACTGCCATTGATACTGGAAATCTTGAGTACAAATGAAGTAGGCGGAATGAGTCATGTAGCGGTGAAATGCATAGATATGACTCAGAACACCGATTGCGAAGGCAGCTTACTAACATGTAACTGACGCTGAGGGACGAAAGCG	Late-Summer	0.637902	8.06045e-29		Bacteroidetes_1149			Bacteria	Bacteroidetes	FCB group	Flavobacteriia	Flavobacteriales	Crocinitomicaceae	Fluviicola	Fluviicola taffensis	Fluviicola taffensis DSM 16823	Fluviicola taffensis DSM 16823						Late-Summer	Late-Summer	0.792071	6.03e-31			Late-Summer	Summer	0.512147	1.04448e-15
CGTTATCCGGAATCATTGGGTTTAAAGGGTCCGCAGGCGGTTTTTTAAGTCAGAGGTGAAATCCTGCAGCTCAACTGTAGAATTGCCTTTGATACTGAAAGACTTGAGTTATTGTGAAGTGGTTAGAATGTGTGGTGTAGCGGTGAAATGCATAGATATCACACAGAATACCAATTGCGAAGGCAGATCACTAACAATATACTGACGCTCAGGGACGAAAGCG	Late-Summer	0.62533	1.90803e-27		Bacteroidetes_975			Bacteria	Bacteroidetes	FCB group	Flavobacteriia	Flavobacteriales	Flavobacteriaceae	Kordia			Kordia						Late-Summer	Late-Summer	0.71011	1.81e-22			Late-Summer	Summer	0.687576	2.7013e-31
CGTTGCTCGGAATCACTGGGCGTAAAGGGTCCGCAGGCGGCGAGATAAGTCGGATGTGAAAGCCCGGGGCTCAACCCCGGAACTGCATTCGAAACTGTCTCACTTGAATACGGGAGAGGAGAGTGGAATTCCTGGTGTAGAGGTGAAATTCGTAGATATCAGGAGGAACACCAGTGGCGAAAGCGGCTCTCTGGCCCGATATTGACGCTCATGGACGAAAGCG	Late-Summer	0.614885	2.3748e-26		Proteobacteria_4273			Bacteria	Proteobacteria		Deltaproteobacteria	Desulfarculales	Desulfarculaceae	Desulfarculus	Desulfarculus baarsii	Desulfarculus baarsii DSM 2075	Desulfarculus baarsii DSM 2075						Late-Summer	Late-Summer	0.436395	8.77e-08			Late-Summer	Summer	0.531509	5.30591e-17
CGTTAATCGGAATTACTGGGCGTAAAGCGTACGTAGGCGGTTGATTAAGCAGGATGTGAAAGCCCCGAGCTCAACTTGGGAACTGCATCCTGAACTGGTCAACTAGAGTACAGCAGAGGAGAGTGGAATTTCTCGTGTAGCGGTGAAATGCGTAGATATGAGAAGGAACACCAGTGGCGAAGGCGACTCTCTGGGTTGATACTGACGCTGAGGTACGAAAGCG	Late-Summer	0.602888	3.83725e-25		Proteobacteria_6909			Bacteria	Proteobacteria		Gammaproteobacteria	Oceanospirillales	Litoricolaceae	Litoricola	Litoricola lipolytica		Litoricola lipolytica						Late-Summer	Early-Summer	0.422962	2.36e-07			Late-Summer	Summer	0.517665	4.55481e-16
CGTTAATCGGAATTACTGGGCGTAAAGCGCGCGTAGGTGGCATATTAAGTTAGATGTGAAATCCCGAGGCTTAACCTCGGAACTGCATCTAAAACTAATAAGCTAGAGTACTAGAGAGGAAAGTAGAATTCTTAGTGTAGCGGTGGAATGCGTAGATATTAAGAGGAATACCAATGGCGAAGGCAACTTTCTGGATAGATACTGACACTGAGGTGCGAAAGCG	Late-Summer	0.602595	4.10056e-25		Proteobacteria_3957			Bacteria	Proteobacteria		Gammaproteobacteria	Thiotrichales	Thiotrichaceae	Thioploca	Thioploca ingrica		Thioploca ingrica						Late-Summer	Late-Summer	0.457412	1.7e-08			Late-Summer	Summer	0.393883	2.35209e-09
CGTTAATCGGAATTACTGGGCGTAAAGCGCGCGTAGGCGGTTTTTTAAGTCGGATGTGAAAGCCCCGGGCTCAACCTGGGAACTGCATCCGATACTGGATAACTAGAATGCGGGAGAGGGAGGTAGAATTCCATGTGTAGCAGTGAAATGCGTAGATATATGGAGGAATACCAGTGGCGAAGGCGGCCTCCTGGCTCGACATTGACGCTGAGGTGCGAAAGCG	Late-Summer	0.582576	3.29238e-23		Proteobacteria_1589			Bacteria	Proteobacteria		Gammaproteobacteria	Cellvibrionales	Halieaceae	Halioglobus	Halioglobus pacificus		Halioglobus pacificus						Late-Summer	Late-Summer	0.609867	2.03e-15			Late-Summer	Summer	0.516895	5.11852e-16
CGTTGCTCGGAATCACTGGGCGTAAAGCGCTCGCAGGCGGCCTGTCAAGTCAGGTGTGAAATCCCAGGGCTCAACCCTGGAACTGCACTTGAAACTGGCAAGCTAGAGTACGAGAGAGGGGAGCGGAATTCCTGGTGTAGAGGTGAAATTCGTAGATATCAGGAGGAACACCCGTGGCGAAAGCGGCTCCCTGGCTCGATACTGACGCTCATGAGCGAAAGCG	Late-Summer	0.582421	3.40219e-23		Proteobacteria_6572			Bacteria	Proteobacteria								Proteobacteria						Late-Summer	Early-Summer	0.32403	0.000105753			Late-Summer	Summer	0.510745	1.28675e-15
TGTTATCCGGAATCACTGGGCGTAAAGCGTCTGCAGGTGGTTTTTTAAGTCTGATGTTAAAACTTGAGGCTCAACCTCAATCCAGCATTGGAAACTAGAAGACTAGAGTATAGTAGGGATAGAGGGAATTTCCAGTGGAGCGGTGAAATGCGTAGATATTGGAAAGAACACCGATGGCGAAAGCACTCTATTGGACTATTACTGACACTCAGAGACGAAAGCT	Late-Summer	0.580762	4.82669e-23		Cyanobacteria_135			Bacteria	Cyanobacteria	Cyanobacteria/Melainabacteria group													Late-Summer	Early-Summer	0.661987	9.54e-19			Late-Summer	Summer	0.66103	2.96845e-28
CGTTATCCGGAATTATTGGGCGTAAAGCGTCCGCAGGCGGCCCAGAAAGTCTGCTGTTAAAACGTGGAGCTTAACTCCATCATGGCAGTGGAAACTGTTGGGCTTGAGTGTGGTAGGGGCAGAGGGAATTCCCGGTGTAGCGGTGAAATGCGTAGATATCGGGAAGAACACCAGTGGCGAAGGCGCTCTGCTGGGCCATAACTGACGCTCATGGACGAAAGCC	Late-Summer	0.580443	5.16174e-23		Cyanobacteria_254			Bacteria	Cyanobacteria	Cyanobacteria/Melainabacteria group		Synechococcales	Synechococcaceae	Synechococcus	Synechococcus sp. KORDI-49		Synechococcus sp. KORDI-49						Late-Summer	Late-Summer	0.321085	0.000123152			Late-Summer	Summer	0.470369	3.5262e-13
CGTTGTTCGGAATCATTGGGCGTAAAGAGAGCGTAGGCGGCTTGGTAAGTCGGGTGTGAAAGCCCGGGGCTCAACCCCGGAAATGCGCCCGATACTGCTGAGCTTGAATACGGGAGAGGGTTGCGGAATTGTCGGTGTAGAGGTGAAATTCGTAGATATCGGCAAGAACATCAGTGGCGAAGGCGGCAACCTGGACCGATATTGACGCTGAGGCTCGAAAGCG	Late-Summer	0.576463	1.18394e-22		Proteobacteria_4368			Bacteria	Proteobacteria		Deltaproteobacteria	Myxococcales					Myxococcales						Late-Summer	Late-Summer	0.297619	0.000392438			Late-Summer	Summer	0.438496	1.81075e-11
CGTTGCTCGGAATTACTGGGCGTAAAGCGTACGCAGGCGGCGCATCAAGTCGGATGTGAAAGCCCTGGGCTCAACCCAGGAACTGCATTCGAAACTGGTGCACTTGAGTCCGAGAGAGGGTGGTGGAATTCCTGGTGTAGAGGTGAAATTCGTTGAGATCAGGAGGAACATCAGCGGCGAAGGCGGCCACCTGGCTCGGTACTGACGCTCATGTACGAAAGCG	Late-Summer	0.570635	3.91311e-22		Proteobacteria_4273			Bacteria	Proteobacteria		Deltaproteobacteria	Desulfarculales	Desulfarculaceae	Desulfarculus	Desulfarculus baarsii	Desulfarculus baarsii DSM 2075	Desulfarculus baarsii DSM 2075						Late-Summer	Late-Summer	0.3577	1.65e-05			Late-Summer	Summer	0.374426	1.58359e-08
CGTTATCCGGAATTATTGGGCGTAAAGCGTCCGCAGGCGGCCCTTCAAGTCTGCTGTTAAAAAGTGGAGCTTAACTCCATCATGGCAGTGGAAACTGTTGGGCTTGAGTGTGGTAGGGGCAGAGGGAATTCCCGGTGTAGCGGTGAAATGCGTAGATATCGGGAAGAACACCAGTGGCGAAGGCGCTCTGCTGGGCCATAACTGACGCTCATGGACGAAAGCC	Late-Summer	0.568611	5.89451e-22		Cyanobacteria_5			Bacteria	Cyanobacteria	Cyanobacteria/Melainabacteria group		Synechococcales	Synechococcaceae	Synechococcus	Synechococcus sp. WH 7803		Synechococcus sp. WH 7803						Late-Summer	Late-Summer	0.321033	0.00012348			Late-Summer	Summer	0.446438	7.04813e-12
CGTTATCCGGAATCATTGGGTTTAAAGGGTCCGCAGGCGGGAATGTAAGTCAGAGGTGAAATCCTACAGCTCAACTGTAGAACTGCCTTTGATACTGCGTTTCTTGAATTCGATCGAAGTGGGCGGAATATGACATGTAGCGGTGAAATGCATAGATATGTCATAGAACACCGATAGCGAAGGCAGCTCACTAGGTCTGAATTGACGCTCATGGACGAAAGCG	Late-Summer	0.567653	7.14877e-22		Bacteroidetes_1149			Bacteria	Bacteroidetes	FCB group	Flavobacteriia	Flavobacteriales	Crocinitomicaceae	Fluviicola	Fluviicola taffensis	Fluviicola taffensis DSM 16823	Fluviicola taffensis DSM 16823						Late-Summer	Late-Summer	0.473771	4.38e-09			Late-Summer	Summer	0.511467	1.15579e-15
CGTTATCCGGAATTATTGGGCGTAAAGCGTCCGCAGGCGGCCCAGAAAGTCTGCTGTTAAAACGTGGAGCTTAACTCCATCATGGCAGTGGAAACTGTTGGGCTTGAGTGTGGTAGGGGCAGAGGGAATTCCCGGTGTAGCGGTGAAATGCGTAGATATCGGGAAGAACACCAGTGGCGAAGGCGCTCTGCTGGGCCATCACTGACGCTCATGGACGAAAGCC	Late-Summer	0.566467	9.06826e-22		Cyanobacteria_3			Bacteria	Cyanobacteria	Cyanobacteria/Melainabacteria group		Synechococcales	Synechococcaceae	Synechococcus	Synechococcus sp. NOUM97013		Synechococcus sp. NOUM97013						Late-Summer	Late-Summer	0.655919	2.52e-18			Late-Summer	Summer	0.50213	4.53865e-15
CATTATTCGGAATTACTGGGCGTAAAGGGTCCGCAGGTTGTTTACTAAGTCAGATGTGAAAATTCAGTGCTTAACACTGAACCTGCATATGAAACTGGTAGACTAGAGTATGTGAGAGGTAAGCGGAATTTGTGGTGTAGCGGTGGAATGCGTAGATATCACAAGGAAGACCAAAGGCGAAGGCAGCTTACTGGCACAATACTGACACTCATGGACGAAGGCT	Late-Summer	0.566346	9.29074e-22		Proteobacteria_6696			Bacteria	Proteobacteria		Gammaproteobacteria	Thiotrichales	Francisellaceae				Francisellaceae						Late-Summer	Late-Summer	0.367401	9.3e-06			Late-Summer	Summer	0.387271	4.56008e-09
CGTTATCCGGAATCATTGGGCGTAAAGCGCCTGTAGGTTGTTTACAAAGTCTGTTGTTAAAGACTAGGGCTTAACCCTAGAAAAGCAATGGAAACTCGTAGACTAGAGTATGGCAGGGGTAGAGGGAATTTCTAGTGTAGCGGTGAAATGCGTAGATATTAGAAAGAACACCAGTGGCGAAAGCGCTCTACTGGACCATTACTGACACTCAGAGGCGAAAGCT	Late-Summer	0.562241	2.10085e-21		Cyanobacteria_154			Bacteria	Cyanobacteria	Cyanobacteria/Melainabacteria group		Chroococcales					Chroococcales						Late-Summer	Late-Summer	0.452509	2.52e-08			Late-Summer	Summer	0.547851	3.68221e-18
CGTTATCCGGATTTATTGGGTTTAAAGGGTCCGTAGGCGGGCTAGTAAGTCAGTGGTGAAAGCCTTCAGCTTAACTGGAGAACTGCCATTGATACTGCTAGTCTTGAGTTCGGTTGAAGTGGGCGGAATATGTGGTGTAGCGGTGAAATGCATAGATATCACATAGAACACCTATTGCGAAGGCAGCTCACTAAGCCGATACTGACGCTCAGGGACGAAAGCG	Late-Summer	0.555289	8.15673e-21		Bacteroidetes_518			Bacteria	Bacteroidetes	FCB group	Flavobacteriia	Flavobacteriales	Schleiferiaceae	Owenweeksia	Owenweeksia hongkongensis	Owenweeksia hongkongensis DSM 17368	Owenweeksia hongkongensis DSM 17368						Late-Summer	Late-Summer	0.415021	4.17e-07			Late-Summer	Summer	0.447621	6.11175e-12
CGTTGTCCGGAATCATTGGGTGTAAAGGGTACGTAGGCGGGAGCCTAAGTCTGGGGTGAAATCTTGCCGCTTAACGGTAAAATGGCCTTGGATACTGGGTTTCTTGAGTGCAGAAGAGGCAGGTGGAATTCGTGGTGTAGCGGTGAAATGCTTAGATATCACGAAGAACATCAGTGGCGAAGGCGGCCTGCTGGTCTGCAACTGACGCTGAGGTACGAAAGCG	Late-Summer	0.55178	1.59818e-20		phylum_reps_735																		Late-Summer	Late-Summer	0.382807	3.59e-06			Late-Summer	Summer	0.403577	8.67459e-10
CGTTATCCGGATTTATTGGGCATAAAGAGTGCGTAGGCGGTAATTTAAGTCAGATGTTAAATCCCACAGCTCAACTGTGGTCCGCATTTGAAACTGATTTACTAGAGACTAGGAGAGGAAAGTGGAACTCACAGTGTAGCGGTGAAATGCGTAGATATTGTGAGGAACACCAATGGCGAAGGCAGCTTTCTGGACTAGATCTGACGCTGAGGCACGAAAGCA	Late-Summer	0.550594	2.00256e-20		phylum_reps_2497																		Late-Summer	Late-Summer	0.560343	8.91e-13			Late-Summer	Summer	0.455197	2.41954e-12
CGTTATCCGGATTTATTGGGTTTAAAGGGTCCGTAGGTGGACCATTAAGTCAGAGGTGAAAGCCCGCGGCTCAACCGCGGAACTGCCTTTGATACTGGTGGTCTTGAGTGTGCTCGAAGTTGGCGGAATATGACATGTAGCGGTGAAATGCTTAGATATGTCATAGAACACCGATTGCGAAGGCAGCCAACTAGGTCACAACTGACACTGAGGGACGAAAGCG	Late-Summer	0.549781	2.33651e-20		Bacteroidetes_518			Bacteria	Bacteroidetes	FCB group	Flavobacteriia	Flavobacteriales	Schleiferiaceae	Owenweeksia	Owenweeksia hongkongensis	Owenweeksia hongkongensis DSM 17368	Owenweeksia hongkongensis DSM 17368						Late-Summer	Late-Summer	0.447091	3.86e-08			Late-Summer	Summer	0.474445	2.06776e-13
CGTAATTCGGAATTACTGGGCGTAAAGCGCGCGTAGGCGGTTAAGTAAGTTAATTGTGAAAGCCCAAAGCTCAACTTTGGAATTGCAATTAAAACTACTTAGCTAGAGTTTATCAGAGGAAAGCGGAATACATAGTGTAGAGGTGAAATTCGTAGATATTATGTAGAACACCAGTTGCGAAGGCGGCTTTCTGGGATAATACTGACGCTGAGGTGCGAAAGTA	Late-Summer	0.540251	1.37932e-19		Proteobacteria_5213			Bacteria	Proteobacteria		Alphaproteobacteria	Pelagibacterales		Candidatus Fonsibacter	Candidatus Fonsibacter ubiquis		Candidatus Fonsibacter ubiquis						Late-Summer	Late-Summer	0.805442	1.07e-32			Late-Summer	Summer	0.5938	8.81777e-22
CGTTATCCGGATTTACTGGGTTTAAAGGGTGCGCAGGCGGTAATATAAGTCAGTGGTGAAAGCTTCCAGCTCAACTGGGAAACTGCCATTGATACTGTAATACTTGAATTTGGGAGAGGTAGGCGGAATACATCATGTAGCGGTGAAATGCTTAGATATGATGTAGAACACCGATTGCGAAGGCAGCTTACTAGACCAACATTGACGCTCATGCACGAAAGCG	Late-Summer	0.538231	1.99516e-19		Bacteroidetes_272			Bacteria	Bacteroidetes	FCB group	Chitinophagia	Chitinophagales	Chitinophagaceae				Chitinophagaceae						Late-Summer	Early-Summer	0.389629	2.32e-06			Late-Summer	Summer	0.607458	5.6761e-23
CGTTATCCGGAATCACTGGGTTTAAAGGGTGCGTAGGCGGCGTAATAAGTCAGAGGTGAAAGCTCACAGCTTAACTGTGGAACTGCCTTTGATACTGTTATGCTTGAATTAGGTTGAGGTTGGCGGAATGTGACATGTAGCGGTGAAATGCATAGATATGTCATAGAACATCGATTGCGAAGGCAGCTGGCTAGACCTTAATTGACGCTGAGGCACGAAAGCG	Late-Summer	0.532822	5.29793e-19		Bacteroidetes_223			Bacteria	Bacteroidetes	FCB group	Saprospiria	Saprospirales	Haliscomenobacteraceae	Haliscomenobacter	Haliscomenobacter hydrossis	Haliscomenobacter hydrossis DSM 1100	Haliscomenobacter hydrossis DSM 1100						Late-Summer	Late-Summer	0.412456	4.99e-07			Late-Summer	NA	NA	NA
CGTTGTTCGGAATCACTGGGCGTAAAGCGCGCGTAGGCGGACTGATTAGTTGGGGGTGAAAGCCCGGAGCTCAACTCCGGAACTGCCTCCAATACTGTCAGTCTTGAGATCGAGAGAGGTAAGCGGAATTCCGAGTGTAGAGGTGAAATTCGTAGATATTCGGAAGAACACCAGTGGCGAAGGCGGCTTACTGGCTCGATACTGACGCTGAGGTGCGAAAGCG	Late-Summer	0.526685	1.57086e-18		Proteobacteria_5428			Bacteria	Proteobacteria		Alphaproteobacteria	Rhizobiales	Phyllobacteriaceae	Oricola	Oricola thermophila		Oricola thermophila						Late-Summer	Late-Summer	0.697191	2.13e-21			Late-Summer	Summer	0.499665	6.4676e-15
CGTTGTTCGGAATTACTGGGCGTAAAGCGCGCGTAGGCGGACTGGAAAGTTGGGGGTGAAATCCCGAGGCTCAACCTCGGAACTGCCTTCAAAACTATCAGTCTAGAGTGCGAGAGAGGTGAGTGGAACTCCGAGTGTAGAGGTGAAATTCGTAGATATTCGGAAGAACACCAGTGGCGAAGGCGACTCACTGGCTCGATACTGACGCTGAGGTGCGAAAGTG	Late-Summer	0.522328	3.35347e-18		Proteobacteria_5951			Bacteria	Proteobacteria		Alphaproteobacteria	Rhodobacterales	Rhodobacteraceae	Salipiger	Salipiger profundus		Salipiger profundus						Late-Summer	Early-Summer	0.314294	0.00017395			Late-Summer	Summer	0.441287	1.30346e-11
CGTTATCCGGATTTACTGGGTTTAAAGGGTGCGCAGGCGGTCTATTAAGTCAGTGGTGAAAGCCCGGGGCTCAACTCCGGAATTGCCATTGAAACTGATAGACTTGAGTATGGAAGAGGTAGGCGGAATACAGCATGTAGCGGTGAAATGCATAGATATGCTGTAGAACACCAATTGCGAAGGCAGCTTACTATACCATTACTGACGTTCAGGCACGAAAGCG	Late-Summer	0.521747	3.70718e-18		Bacteroidetes_273			Bacteria	Bacteroidetes	FCB group							FCB group						Late-Summer	Late-Summer	0.280004	0.00088045			Late-Summer	Summer	0.416007	2.30203e-10
CGTTGTTCGGAATTACTGGGCGTAAAGGGCGTGTAGGCGGATGATCAAGCTAGGGGTGAAAGCCCAGGGCCCAACCCTGGAACTGCCTTTAGAACTGATTGTCTAGAATCCGTAAGGGGAGTGTGGAATTCCTAGTGTAGAGGTGAAATTCGTAGATATTAGGAAGAACACCAGTGGCGAAGGCGGCACTCTGGTACGGTATTGACGCTGAGGCGCGAAAGCG	Late-Summer	0.515281	1.11762e-17		Proteobacteria_6155			Bacteria	Proteobacteria		Alphaproteobacteria	Emcibacterales	Emcibacteraceae	Emcibacter			Emcibacter						Late-Summer	Early-Summer	0.514121	1.12e-10			Late-Summer	Summer	0.513821	8.13368e-16
CGTTATCCGGATTTATTGGGCGTAAAGCGTCTGTAGGTTGCTTAGTAAGTCTGTTGTTAAAGCCTAAGGCTTAACCTTAGATCTGCAGTGGAAACTGCTAAGCTTGAGTATGATAGGGGTAGAGGGAATTCCTAGTGTAGCGGTGAAATGCGTAGATATTAGGAAGAACACCAGAAGCGAAGGCGCTCTACTGGGTCATTACTGACACTCAGAGACGAAAGCT	Late-Summer	0.514936	1.18459e-17		Cyanobacteria_209			Bacteria	Cyanobacteria	Cyanobacteria/Melainabacteria group		Synechococcales	Prochlorotrichaceae	Halomicronema	Halomicronema hongdechloris	Halomicronema hongdechloris C2206	Halomicronema hongdechloris C2206						Late-Summer	Early-Summer	0.248682	0.00327014			Late-Summer	Summer	0.523471	1.87091e-16
CGTTATCCGGAATAATTGGGCGTAAAGCGTCCGCAGGTGGTTTTGTAAGTCTGCTGTTAAAGCGTGAGGCTCAACCTCATAACGGCGGTGGAAACTACAAGACTTGAGTGCGTTCGGGGCAGAGGGAATTCCTGGTGTAGCGGTGAAATGCGTAGATATCAGGAAGAACACCGGTGGCGAAAGCGCTCTGCTAGGCCGTAACTAACACTGAGGGACGAAAGCT	Late-Summer	0.514825	1.2069e-17		Cyanobacteria_49			Bacteria	Cyanobacteria	Cyanobacteria/Melainabacteria group		Nostocales	Rivulariaceae	Rivularia	Rivularia sp. PCC 7116		Rivularia sp. PCC 7116						Late-Summer	Late-Summer	0.371148	7.41e-06			Late-Summer	Summer	0.348814	1.62085e-07
CGTTATCCGGATTTATTGGGTTTAAAGGGTACGTAGGCGGTAATATAAGTCAGTGGTGAAATCCTGCAGCTCAACTGTAGAACTGCCATTGAAACTGTATTACTTGAGTATACTTGAGGTAGGCGGAATGAGTAGTGTAGCGGTGAAATGCTTAGATATTACTCAGAACACCGATTGCGAAGGCAGCTTACTAAGGTATAACTGACGCTGATGTACGAAAGCG	Late-Summer	0.513186	1.58992e-17		Bacteroidetes_516			Bacteria	Bacteroidetes	FCB group	Bacteroidia	Marinilabiliales	Salinivirgaceae	Salinivirga	Salinivirga cyanobacteriivorans		Salinivirga cyanobacteriivorans						Late-Summer	Early-Summer	0.444407	4.75e-08			Late-Summer	Summer	0.530854	5.88702e-17
CGTTATTCGGATTCACTGGGCGTAAAGGGTGCGCAGGCGGTTATGTGTGTCAGGTGTGAAATCTCGGAGCTCAACTCCGAAACTGCGCCTGAAACTACATGACTAGAGTATCGGAGAGGTGAGCGGAATTCATGGTGTAGCAGTGAAATGCGTAGATATCATGAGGAACACCAGAGGCGAAGGCGGCTCACTGGACGATTACTGACGCTCAGGCACGAAAGCA	Late-Summer	0.511885	1.97666e-17		Verrucomicrobia_4			Bacteria	Verrucomicrobia	PVC group	Opitutae	Opitutales	Opitutaceae				Opitutaceae						Late-Summer	Late-Summer	0.332302	6.84e-05			Late-Summer	Summer	0.32499	1.18047e-06
TGTTATTCGGAATTATTGGGCGTAAAGCGTCTGTAGGTGGCATGGTAAGTCCTGTGTTAAATCCCAAAGCTTAACTTTGGAATGGCATAGGAAACTACTAAGCTTGAGTTCGGTAGAGGTAGAGGGAATTCCCAGTGTAGCGGTGAAATGCGAAGATATTGGGAGGAACACCAACGGCGAAAGCACTTTACTAGGCCGATACTGACACTCAGAGACGAAAGCT	Late-Summer	0.507967	3.78681e-17		Cyanobacteria_148			Bacteria	Cyanobacteria	Cyanobacteria/Melainabacteria group		Synechococcales					Synechococcales						Late-Summer	Late-Summer	0.478106	3.02e-09			Late-Summer	Summer	0.433998	3.05673e-11
CGTTATCCGGATTTATTGGGTTTAAAGGGTCCGTAGGCGGATGATTAAGTCAGTGGTGAAAGCCCACAGCTCAACTGTGGAACTGCCATTGATACTGATCATCTTGAGTACAATTGAAGTTGGCGGAATAGGTCATGTAGCGGTGAAATGCTTAGATATGACCTAGAACACCGATTGCGAAGGCAGCCAACTAAGCTGTAACTGACGCTGAGGGACGAAAGCG	Late-Summer	0.497924	1.93013e-16		Bacteroidetes_518			Bacteria	Bacteroidetes	FCB group	Flavobacteriia	Flavobacteriales	Schleiferiaceae	Owenweeksia	Owenweeksia hongkongensis	Owenweeksia hongkongensis DSM 17368	Owenweeksia hongkongensis DSM 17368						Late-Summer	Late-Summer	0.481948	2.17e-09			Late-Summer	Summer	0.460193	1.29677e-12
CGTTAATCGGAATTACTGGGCGTAAAGCGTGCGCAGGCGGTTTGCTAAGACAGGTGTGAAATCCCCGGGCTCAACCCGGGAACTGCATCTGTGACTAGCAGACTAGAGTTTGGCAGAGGGGGGTGGAATTCCTGGTGTAGCAGTGAAATGCGTAGATATCAGGAGGAACACCGATGGCGAAGGCAGCCCCCTGGGCCACCACTGACGCTCATGCACGAAAGCG	Late-Summer	0.490285	6.4302e-16		Proteobacteria_2752			Bacteria	Proteobacteria		Betaproteobacteria	Rhodocyclales	Zoogloeaceae	Thauera	Thauera chlorobenzoica		Thauera chlorobenzoica						Late-Summer	Late-Summer	0.62517	2.49e-16			Late-Summer	Summer	0.493415	1.56764e-14
CGTTATCCGGATTTATTGGGTTTAAAGGGTCCGCAGGCGGACCGGTCAGTCAGTGGTGAAATCCCATCGCTCAACGATGGAACTGCCATTGATACTGCCGGTCTTGAGTCTAGTTGACGTAGGCGGAATATGACATGTAGCGGTGAAATGCATAGATATGTCATAGAACACCAATTGCGAAGGCAGCTTACGAAACTACGACTGACGCTCATGGACGAAAGCG	Late-Summer	0.486218	1.20571e-15		Bacteroidetes_1149			Bacteria	Bacteroidetes	FCB group	Flavobacteriia	Flavobacteriales	Crocinitomicaceae	Fluviicola	Fluviicola taffensis	Fluviicola taffensis DSM 16823	Fluviicola taffensis DSM 16823						Late-Summer	Late-Summer	0.5673	4.03e-13			Late-Summer	Summer	0.454871	2.51913e-12
CGTTATTCGGAATCACTGGGCTTAAAGGGTGCGTAGGCGGCTACAAAGGTCAGATGTGAAATCCCACGGCTCAACCGTGGAACTGCGTTTGAAACCGTGTAGCTTGAGGGAGTCAGAGGTAAGCGGAACTGATGGTGGAGCGGTGAAATGCGTTGATATCATCAGGAACACCGGTGGCGAAAGCGGCTTACTGGGACTTTTCTGACGCTGAGGCACGAAAGCT	Late-Summer	0.484857	1.48502e-15		Planctomycetes_45			Bacteria	Planctomycetes	PVC group	Planctomycetia	Pirellulales	Pirellulaceae	Mariniblastus	Mariniblastus fucicola		Mariniblastus fucicola						Late-Summer	NA	NA	NA			Late-Summer	Summer	0.405877	6.81436e-10
CGTTATCCGGAATCATTGGGTTTAAAGGGTCCGTAGGCGGTTTTTTAAGTCAGAGGTGAAATCCTGCAGCTCAACTGTAGCATTGCCTTTGATACTGAAAGACTTGAGTTATTGTGAAGTAGTTAGAATGTGTAGTGTAGCGGTGAAATGCATAGATATTACACAGAATACCGATTGCGAAAGCAGATTACTAACAATATACTGACGCTGAGGGACGAAAGCG	Late-Summer	0.483453	1.83968e-15		Bacteroidetes_975			Bacteria	Bacteroidetes	FCB group	Flavobacteriia	Flavobacteriales	Flavobacteriaceae	Kordia			Kordia						Late-Summer	Late-Summer	0.290988	0.00053523			Late-Summer	Summer	0.317427	2.1424e-06
CGTTGTTCGGAATTACTGGGCGTAAAGCGCGCGTAGGCGGACTAGAAAGTTGGGGGTGAAATCCCGGGGCTCAACCTCGGAACTGCCTCCAAAACTGCTAGTCTAGAGTTCGAGAGAGGTGAGTGGAATTCCGAGTGTAGAGGTGAAATTCGTAGATATTCGGAGGAACACCAGTGGCGAAGGCGGCTCACTGGCTCGATACTGACGCTGAGGTGCGAAAGTG	Late-Summer	0.483411	1.85138e-15		Proteobacteria_6004			Bacteria	Proteobacteria		Alphaproteobacteria	Rhodobacterales	Rhodobacteraceae	Salipiger			Salipiger						Late-Summer	Early-Summer	0.613166	1.3e-15			Late-Summer	NA	NA	NA
TGTTGTTCGGAATCACTGGGCGTAAAGGGAGCGTAGGCGGAAGTATAAGTCAGGTGTTTAATCTTGGGGCCCAACCCCAATTGTGCGCTTGAAACTGTATTTCTTGAATGTGGTAGAGGTAGATGGAATTCCTGGTGTAGCGGTGGAATGCGTAGATATCAGGAGGAACACCAGTTGCGAAGGCGATCTACTGGACTAACATTGACGCTGAGGCTCGAAAGCG	Late-Summer	0.481468	2.48613e-15		Spirochaetes_149			Bacteria	Spirochaetes		Spirochaetia						Spirochaetia						Late-Summer	NA	NA	NA			Late-Summer	Summer	0.308572	4.21797e-06
CGTTAATCGGAATTACTGGGCGTAAAGCGCGCGTAGGCGGCTTGGTAAGTTGGATGTGAAAGCCCCGGGCTCAACCTGGGAACTGCATCCAAAACTGCCTAGCTAGAGTATGGTAGAGGATGGCGGAATTTCCTGTGTAGCGGTGAAATGCGTAGATATAGGAAGGAACATCAGTGGCGAAGGCGGCCATCTGGACCAATACTGACGCTGAGGTGCGAAAGCG	Late-Summer	0.478157	4.08997e-15		Proteobacteria_1940			Bacteria	Proteobacteria		Gammaproteobacteria	Pseudomonadales	Pseudomonadaceae				Pseudomonadaceae						Late-Summer	Early-Summer	0.545181	4.72e-12			Late-Summer	Summer	0.706351	1.1922e-33
CGTTATCCGGAATCATTGGGTTTAAAGGGTCCGTAGGTGGATAATTAAGTCAGAGGTGAAATCTTGCAGCTCAACTGTAAAATTGCCTTTGATACTGGTTATCTTGAGTTATTATGAAGTAGTTAGAATATGTAGTGTAGCGGTGAAATGCATAGATATTACATAGAATACCAATTGCGAAGGCAGATTACTAATAATATACTGACACTGATGGACGAAAGCG	Late-Summer	0.475465	6.10672e-15		Bacteroidetes_1012			Bacteria	Bacteroidetes	FCB group	Flavobacteriia	Flavobacteriales	Flavobacteriaceae	Formosa			Formosa						Late-Summer	Late-Summer	0.674667	1.17e-19			Late-Summer	Summer	0.553863	1.3297e-18
CGTTATTCGGAATAACTGGGCGTAAAGGGTTTGTAGACGGTAAATTTTTATTAAAGGTGAAATATGGAAGCTCAACTTTCATAAGCTTTTAGATTCAATTTACTTGAGTTAGAGAGAGGATAGCAGAATTTTTCAAGTAGGGGTTAAATCCATGAATATGAAAAAGAATACCAGATGCGAAGGCGGCTATCTAGCTCTATACTGACGTTGAGGAACTAAAGCG	Late-Summer	0.466622	2.2234e-14		Proteobacteria_6887			Bacteria	Proteobacteria		Gammaproteobacteria	Oceanospirillales	Halomonadaceae	Candidatus Carsonella	Candidatus Carsonella ruddii		Candidatus Carsonella ruddii						Late-Summer	Early-Summer	0.488995	1.16e-09			Late-Summer	Summer	0.539859	1.3822e-17
CGTTAATCGGAATTACTGGGCGTAAAGCGCGCGTAGGTGGTTTGATAAGCTAGCTGTGAAAGCCCCGGGCTCAACCTGGGAACTGCAGTTAGAACTGTCTGACTAGAGTACAGTAGAGGGTGGCGGAATTTCCTGTGTAGCGGTGAAATGCGTAGATATAGGAAGGAACATCAGTGGCGAAGGCGGCCACCTGGACTGATACTGACACTGAGGTGCGAAAGCG	Late-Summer	0.460802	5.10049e-14		Proteobacteria_1936			Bacteria	Proteobacteria		Gammaproteobacteria	Pseudomonadales	Pseudomonadaceae	Azotobacter	Azotobacter chroococcum		Azotobacter chroococcum						Late-Summer	NA	NA	NA			Late-Summer	Summer	0.321431	1.56584e-06
CGTTAATCGGAATTACTGGGCGTAAAGCGCATGCAGGTGGTTTGTTAAGTCAGATGTGAAAGCCCGGGGCTCAACCTCGGAATTGCATTTGAAACTGGCAGACTAGAGTACTGTAGAGGGGGGTAGAATTTCAGGTGTAGCGGTGAAATGCGTAGAGATCTGAAGGAATACCGGTGGCGAAGGCGGCCCCCTGGACAGATACTGACACTCAGATGCGAAAGCG	Late-Summer	0.458737	6.82262e-14		Proteobacteria_1103			Bacteria	Proteobacteria		Gammaproteobacteria	Vibrionales	Vibrionaceae	Vibrio	Vibrio parahaemolyticus		Vibrio parahaemolyticus						Late-Summer	Early-Summer	0.426305	1.85e-07			Late-Summer	Summer	0.405632	6.99274e-10
CGTTAATCGGAATTACTGGGCGTAAAGCGCGCGTAGGCGGCTCTTTAAGTCGGATGTGAAAGCCCCGGGCTCAACCTGGGAACTGCATCCGATACTGGAGGGCTAGAGTGTAGGAGAGGGAGGTAGAATTCCATGTGTAGCAGTGAAATGCGTAGATATATGGAGGAATACCAGTGGCGAAGGCGGCCTCCTGGCTTAACACTGACGCTGAGGTGCGAAAGCG	Late-Summer	0.455087	1.13532e-13		Proteobacteria_1589			Bacteria	Proteobacteria		Gammaproteobacteria	Cellvibrionales	Halieaceae	Halioglobus	Halioglobus pacificus		Halioglobus pacificus						Late-Summer	Early-Summer	0.399501	1.21e-06			Late-Summer	Summer	0.506742	2.32159e-15
CGTTAATCGGAATTACTGGGCGTAAAGCGCGCGTAGGTGGCATACTAAGTTAGATGTGAAATCCCGGGGCTTAACCTCGGAACTGCATCTAAAACTGGTAAGCTAGAGTACTAGAGAGGAAAGTAGAATTCTTAGTGTAGCGGTGGAATGCGTAGATATTAAGAGGAATACCAATGGCGAAGGCAACTTTCTGGATAGATACTGACACTGAGGTGCGAAAGCG	Late-Summer	0.452438	1.63698e-13		Proteobacteria_1923			Bacteria	Proteobacteria		Gammaproteobacteria	Pseudomonadales	Moraxellaceae				Moraxellaceae						Late-Summer	Late-Summer	0.660786	1.16e-18			Late-Summer	Fall/Winter	0.465414	6.68363e-13
CGTTATCCGGATTTATTGGGTTTAAAGGGTCCGTAGGCGGATGATTAAGTCAGTGGTGAAAGCCCACAGCTCAACTGTGGAACTGCCATTGATACTGATTATCTTGAGTACAATTGAAGTTGGCGGAATAGGTCATGTAGCGGTGAAATGCTTAGATATGACCTAGAACACCGATTGCGAAGGCAGCCAACTAAGCTGTAACTGACGCTGAGGGACGAAAGCG	Late-Summer	0.451698	1.81208e-13		Bacteroidetes_518			Bacteria	Bacteroidetes	FCB group	Flavobacteriia	Flavobacteriales	Schleiferiaceae	Owenweeksia	Owenweeksia hongkongensis	Owenweeksia hongkongensis DSM 17368	Owenweeksia hongkongensis DSM 17368						Late-Summer	Late-Summer	0.426	1.9e-07			Late-Summer	Fall/Winter	0.25102	0.000207109
CGTTAATCGGAATTACTGGGCGTAAAGCGCGCGTAGGCGGTTTGGTAAGTTGGATGTGAAAGCCCCGGGCTCAACCTGGGAACTGCATCCAAAACTGCCAGACTAGAGTATGGTAGAGGATGGCGGAATTTCCTGTGTAGCGGTGAAATGCGTAGATATAGGAAGGAACATCAGTGGCGAAGGCGGCCATCTGGACCAATACTGACGCTGAGGTGCGAAAGCG	Late-Summer	0.443391	5.57805e-13		Proteobacteria_2597			Bacteria	Proteobacteria		Gammaproteobacteria	Pseudomonadales	Pseudomonadaceae				Pseudomonadaceae						Late-Summer	Late-Summer	0.34635	3.17e-05			Late-Summer	Summer	0.270785	5.98815e-05
CGTTATCCGGAATTATTGGGCGTAAAGCGTCCGCAGGCGGCCCTTCAAGTCTGCTGTTAAAGCGTGGAGCTTAACTCCATCATGGCAGTGGAAACTGTTGGGCTTGAGTGTGGTAGGGGCAGAGGGAATTCCCGGTGTAGCGGTGAAATGCGTAGATATCGGGAAGAACACCAGTGGCGAAGGCGCTCTGCTGGGCCATCACTGACGCTCATGGACGAAAGCC	Late-Summer	0.426409	5.06168e-12		Cyanobacteria_253			Bacteria	Cyanobacteria	Cyanobacteria/Melainabacteria group		Synechococcales	Synechococcaceae	Synechococcus	Synechococcus sp. KORDI-100		Synechococcus sp. KORDI-100						Late-Summer	Early-Summer	0.329604	7.89e-05			Late-Summer	Summer	0.413988	2.86617e-10
CGTTATCCGGAATCATTGGGTTTAAAGGGTCCGCAGGCGGCCTGTTAAGTCAGAGGTGAAAGCCAACAGCTCAACTGTTGAACTGCCTTTGATACTGATAGGCTTGAGTTATTGTGAAGTGGTTAGAATGTGTGGTGTAGCGGTGAAATGCTTAGATATCACACAGAATACCCATTGCGAAGGCAGATCACTAACAATATACTGACGCTCATGGACGAAAGCG	Late-Summer	0.42458	6.3727e-12		Bacteroidetes_975			Bacteria	Bacteroidetes	FCB group	Flavobacteriia	Flavobacteriales	Flavobacteriaceae	Kordia			Kordia						Late-Summer	Early-Summer	0.285638	0.000683775			Late-Summer	Summer	0.401611	1.0647e-09
TGTTATCCGGAATCACTGGGCGTAAAGCGTCTGTAGGTGGCTTAGCAAGTCAACTGTTAAATCTTGAAGCTCAACTTCGAAATCGCAGTCGAAACTGTTAGGCTAGAGTATAGTAGGGGTAAAGGGAATTTCCAGTGGAGCGGTGAAATGCGTAGAGATTGGAAAGAACACCGATGGCGAAGGCACTTTACTGGGCTATTACTGACACTCAGAGACGAAAGCT	Late-Summer	0.422652	8.11071e-12		Cyanobacteria_154			Bacteria	Cyanobacteria	Cyanobacteria/Melainabacteria group		Chroococcales					Chroococcales						Late-Summer	Early-Summer	0.301539	0.000325535			Late-Summer	Summer	0.375139	1.47995e-08
CGTTAATCGGAATTACTGGGCGTAAAGAGTACGTAGGTTGTTATTTAAGTCAGATGTGAAAGCCCTGGGCTCAACCTAGGAACTGCATCTGATACTGGGTAACTGGAGTATAGTAGAGGAAAGAGGAATTTCTGGTGTAGCAGTGAAATGCGTAGATATCAGAAGGAACATCAGTGGCGAAGGCGTCTTTCTGGACTAATACTGACACTGAGGTACGAAAGCG	Late-Summer	0.42087	1.01231e-11		Proteobacteria_2661			Bacteria	Proteobacteria	sulfur-oxidizing symbionts	Gammaproteobacteria			Candidatus Vesicomyosocius	Candidatus Vesicomyosocius sp. SY067_SCS001		Candidatus Vesicomyosocius sp. SY067_SCS001						Late-Summer	Fall/Winter	0.332245	6.86e-05			Late-Summer	Summer	0.472734	2.58938e-13
CGTTATTCGGAATGACTGGGCGTAAAGAGTTCGTAGGCGGTTTTTTAAGTTGGTTTTTAAAATTTAGGGCATAACCCTAAACGTGAACCAAAACTGAGAAACTTGAGTTTGGTAGAGGATAGTGGAATTCCTAGTGGAAGGATAAAATCTCTAGAGATTAGGAGGAACATCAGAGGCGAAGGCGACTATCTGGACCAAAACTGACGCTGAAGAACGAAAGTA	Late-Summer	0.419357	1.22073e-11		Proteobacteria_5218			Bacteria	Proteobacteria		Alphaproteobacteria	Pelagibacterales					Pelagibacterales						Late-Summer	Late-Summer	0.270496	0.00133319			Late-Summer	Summer	0.399681	1.30034e-09
CGTTGTTCGGAATTACTGGGCGTAAAGGGCGCGTAGGCGGTCTTTTAAGTTAGGCGTGAAAGCCCCGGGCTCAACCTGGGAACTGCGCTTAAGACTGGAAGACTAGAAAACGGAAGAGGGTAGTGGAATTCCCAGTGTAGAGGTGAAATTCGTAGATATTGGGAAGAACACCAGTGGCGAAAGCGGCTACCTGGTCCGATTTTGACGCTGAGGCGCGAAAGCG	Late-Summer	0.417449	1.54348e-11		Proteobacteria_6566			Bacteria	Proteobacteria	SAR116 cluster	Alphaproteobacteria			Candidatus Puniceispirillum	Candidatus Puniceispirillum marinum	Candidatus Puniceispirillum marinum IMCC1322	Candidatus Puniceispirillum marinum IMCC1322						Late-Summer	Late-Summer	0.554195	1.77e-12			Late-Summer	Summer	0.465527	6.5874e-13
CGTTGTTCGGAATCACTGGGCGTAAAGGGAGCGTAGGCGGTCAGGTAAGTCAGATGTGAAATCCCGAGGCTCAACCTCGGAACTGCATCCGATACTGCCTGACTTGAGTAATGGAGGGGTAACTGGAATTCTCGGTGTAGCAGTGAAATGCGTAGAGATCGAGAGGAACACTCGTGGCGAAGGCGAGTTACTGGACATTTACTGACGCTGAGGCTCGAAGGCT	Late-Summer	0.41124	3.27939e-11		Verrucomicrobia_24			Bacteria	Verrucomicrobia	PVC group	Verrucomicrobiae	Verrucomicrobiales	Verrucomicrobiaceae	Luteolibacter	Luteolibacter luteus		Luteolibacter luteus						Late-Summer	Early-Summer	0.352318	2.26e-05			Late-Summer	Summer	0.415839	2.34433e-10
CGTTATCCGGATTCATTGGGTTTAAAGGGTCCGCAGGCGGGTTATTAAGTCAGTGGTGAAATCCTGCAGCTTAACTGTAGAACTGCCATTGATACTGGTAATCTTGAGTGTGGTTGAAGTGGGCGGAATGTGTCATGTAGCGGTGAAATGCATAGATATGACACAGAACACCGATTGCGAAGGCAGCTCACTAAGCCATTACTGACGCTCAGGGACGAAAGCG	Late-Summer	0.408792	4.39499e-11		Bacteroidetes_518			Bacteria	Bacteroidetes	FCB group	Flavobacteriia	Flavobacteriales	Schleiferiaceae	Owenweeksia	Owenweeksia hongkongensis	Owenweeksia hongkongensis DSM 17368	Owenweeksia hongkongensis DSM 17368						Late-Summer	Early-Summer	0.218717	0.00995891			Late-Summer	Summer	0.383195	6.80911e-09
TGTTATCCGGAATCACTGGGCGTAAAGCGTCTGCAGGTGGTTTTTTAAGTCTGATGTTAAAACTTGAGGCTCAACCTCAATCCAGCATTGGAAACTGAAAGACTAGAGTATAGTAGGGATAGAGGGAATTTCCAGTGGAGCGGTGAAATGCGTAGATATTGGAAAGAACACCGATGGCGAAAGCACTCTATTGGACTATTACTGACACTCAGAGACGAAAGCT	Late-Summer	0.4044	7.38887e-11		Cyanobacteria_135			Bacteria	Cyanobacteria	Cyanobacteria/Melainabacteria group													Late-Summer	Early-Summer	0.529132	2.53e-11			Late-Summer	Summer	0.45992	1.34208e-12
TGTTATTCGGAATAATTGGGCGTAAAGGGCGTGTAGGTTGTTGTTTGCTGTTGTTTGTGAAAGCCCAAAGCTTACCTTTGGTGGTGCATGCAAAACGAAGCAACTTGAGTTTGAGAGAGGAAAATAGAATTTCTAGTGGAGAGGTTAAATTCTTAGAGATTAGAAGGAATACCAAAAGCGAAGGCAATTTTCTGGCTCATGACTGACACTGAGGCGCGAAAGCG	Late-Summer	0.402624	9.09677e-11		Proteobacteria_6887			Bacteria	Proteobacteria		Gammaproteobacteria	Oceanospirillales	Halomonadaceae	Candidatus Carsonella	Candidatus Carsonella ruddii		Candidatus Carsonella ruddii						Late-Summer	Early-Summer	0.284199	0.000729736			Late-Summer	Summer	0.477329	1.4112e-13
CGTTGTTCGGAATTACTGGGCGTAAAGGGAGCGCAGGCGGTTCAATTAGTTAGGCGTGAAAGCCCCGGGCTCAACCTGGGAACTGCGCTTAATACTGTTGAACTAGAATACAGAAGAGGATAGTGGAATTCCCAGTGTAGAGGTGAAATTCGTAGATATTGGGAAGAACACCGGTGGCGAAAGCGGCTATCTGGTCTGTTATTGACGCTGAGGCTCGAAAGCG	Late-Summer	0.397675	1.61333e-10		Proteobacteria_5223			Bacteria	Proteobacteria		Alphaproteobacteria						Alphaproteobacteria						Late-Summer	Early-Summer	0.540731	7.59e-12			Late-Summer	Summer	0.426109	7.5184e-11
TGTTATCCGGAATTATTGGGCGTAAAGCGTTTGTAGGTGGGTAAACAAGTCGGTCGTTAAATATAGGGGCTCAACCTCTACTCAGCGACCTGAAACTGTTTATCTTGAGGGTGGTAGGGGTAGAAGGAATTCCTAGTGTAGCGGTGAAATGCGTAGATATTAGGAAGAACACCAACGGCGAAGGCATTCTGCTGGGCCACACCTGACACTGAGAAACGAAAGCT	Late-Summer	0.393377	2.63341e-10		Cyanobacteria_210			Bacteria	Cyanobacteria	Cyanobacteria/Melainabacteria group		Synechococcales	Acaryochloridaceae	Acaryochloris	Acaryochloris marina	Acaryochloris marina MBIC11017	Acaryochloris marina MBIC11017						Late-Summer	NA	NA	NA			Late-Summer	Summer	0.479326	1.08095e-13
CGTTGTTCGGAATTACTGGGCGTAAAGGGCGCGTAGGCGGCTCTTTAAGTTAGGCGTGAAAGCCCCGGGCTCAACCTGGGAACTGCGCTTAAGACTGAAGAGCTAGAAAACGGAAGAGGGTAGTGGAATTCCCAGTGTAGAGGTGAAATTCGTAGATATTGGGAAGAACACCAGTGGCGAAAGCGGCTACCTGGTCCGGATTTGACGCTGAGGCGCGAAAGCG	Late-Summer	0.390464	3.65597e-10		Proteobacteria_6566			Bacteria	Proteobacteria	SAR116 cluster	Alphaproteobacteria			Candidatus Puniceispirillum	Candidatus Puniceispirillum marinum	Candidatus Puniceispirillum marinum IMCC1322	Candidatus Puniceispirillum marinum IMCC1322						Late-Summer	Late-Summer	0.308159	0.000235978			Late-Summer	Summer	0.377329	1.20077e-08
CGTTATCCGGAATCATTGGGCGTAAAGCGTCTGTAGGTGGCTTGGTAAGTCCACTGTTAAAGAGTACAGCTTAACTGTATATGGGCAGTGGAAACTACTAAGCTTGAGTGTGGTAGGGGCAGAGGGAATTCCCGGTGTAGCGGTGAAATGCGTAGATATCGGGAAGAACACCAACGGCGAAAGCACTCTGCTGGGCCAACACTGACACTGAGAGACGAAAGCT	Late-Summer	0.389077	4.26921e-10		Cyanobacteria_221			Bacteria	Cyanobacteria	Cyanobacteria/Melainabacteria group		Synechococcales	Synechococcaceae	Synechococcus	Synechococcus sp. Minos11		Synechococcus sp. Minos11						Late-Summer	Late-Summer	0.277396	0.000988022			Late-Summer	Summer	0.423914	9.61783e-11
CGTTAATCGGAATTACTGGGCGTAAAGCGCGCGTAGGCGGCTTGTTAAGTCAGATGTGAAAGCCCCGGGCTCAACCTGGGAATTGCATTTGAAACTGGCAAGCTAGAGTGCAGTAGAGGGAGGTGGAATTCCAGGTGTAGCGGTGAAATGCGTAGATATCTGGAGGAACACCAGTGGCGAAGGCGGCCTCCTGGACTGACACTGACGCTGAGGTGCGAAAGCG	Late-Summer	0.387729	4.96033e-10		Proteobacteria_2711			Bacteria	Proteobacteria		Gammaproteobacteria	Methylococcales	Methylococcaceae				Methylococcaceae						Late-Summer	Early-Summer	0.41404	4.46e-07			Late-Summer	Summer	0.578095	1.76671e-20
CGTTACTCGGATTCACTGGGCGTAAAGGGTGAGTAGGTGGCCAAGTGTGTCAGGTGTGAAATCCCGGGGCTTAACCCCGGAACTGCGCCTGAAACTACTTGGCTAGAGTCTCGGAGAGGATAGTGGAATTCCAAGTGTAGCGGTGAAATGCGTAGATATTTGGAGGAACACCAGTGGCGAAGGCGACTATCTGGACGAGTACTGACGCTCAATCACGAAAGCG	Late-Summer	0.385294	6.4934e-10		Verrucomicrobia_5			Bacteria	Verrucomicrobia	PVC group	Opitutae	Puniceicoccales	Puniceicoccaceae	Coraliomargarita	Coraliomargarita akajimensis	Coraliomargarita akajimensis DSM 45221	Coraliomargarita akajimensis DSM 45221						Late-Summer	Late-Summer	0.398603	1.28e-06			Late-Summer	Summer	0.368749	2.69913e-08
CGTTATTCGGAATAATTGGGCGTAAAGGGTTCGTAGACGGTATTATAAGTTAATTAAAAAAGATTAAGGCTTAACCTTAATTAAATAATTAAAACTGTTTTACTTTGAGTTTTTTATAGAAGAATAGAATTCCGTGTGTAGAGGTGGTATTTGTAGATCTACGGAGGAATACCTAAAGCGAAGGCAATTCTTTAATAATAACTGACGTTGAGGAACGAAAGCG	Late-Summer	0.382961	8.38842e-10		Proteobacteria_3590			Bacteria	Proteobacteria		Betaproteobacteria			Candidatus Nasuia	Candidatus Nasuia deltocephalinicola		Candidatus Nasuia deltocephalinicola						Late-Summer	Early-Summer	0.415635	3.99e-07			Late-Summer	Summer	0.512877	9.36699e-16
CGTTAATCGGAATTACTGGGCGTAAAGAGCGCGTAGGTGGTTAATTAAGTCATATGTGAAAGCCCCGAGCCCAACTCGGGAACTGCATGTGATACTGGTTGACTAGAGTATAGTAGAGGGAAGTGGAATTTCCGGTGTAGCGGTGAAATGCATAGATATCGGAAGGAACATCAGAGGCGAAGGCGACTTCTTGGGCTATAACTGACACTGAGGCGCGAAAGCG	Late-Summer	0.382128	9.18598e-10		Proteobacteria_6627			Bacteria	Proteobacteria		Gammaproteobacteria						Gammaproteobacteria						Late-Summer	NA	NA	NA			Late-Summer	Summer	0.432625	3.5811e-11
CGTTAATCGGAATTACTGGGCGTAAAGCGCACGCAGGCGGTCTGTTAAGCTAGATGTGAAAGCCCCGAGCTCAACTTGGGATGGTCATTTAGAACTGGCAGACTAGAGTCTTGGAGAGGGGAGTGGAATTTCTAGTGTAGCGGTGAAATGCGTAGATATTAGAAGGAACATCAGTGGCGAAGGCGACTCCCTGGCCAAAGACTGACGCTCATGTGCGAAAGTG	Late-Summer	0.376734	1.64484e-09		Proteobacteria_7071			Bacteria	Proteobacteria		Gammaproteobacteria	Alteromonadales					Alteromonadales						Late-Summer	NA	NA	NA			Late-Summer	Summer	0.31955	1.81532e-06
CGTTCTATAGGTTAATTAGGTGTAAAGAGTGATTTGGACATGAGGTTTATATGTGTAGTGAGAATTTATTATCAGTGTCACGGACTCGTCATTAGAGGAATTCTAGATTTGATGTGGTGTAAAAATGTTAGTTGTAATAGTGAAATCTATATATAATTAGTAGAAAATTGATTTGATATTGGTACCTAATCTTTGGTAGATATTCTATTCACAAAAGCT	Late-Summer	0.374712	2.04074e-09		Proteobacteria_3590			Bacteria	Proteobacteria		Betaproteobacteria			Candidatus Nasuia	Candidatus Nasuia deltocephalinicola		Candidatus Nasuia deltocephalinicola						Late-Summer	Early-Summer	0.367984	8.98e-06			Late-Summer	Summer	0.359853	6.09848e-08
CGTTGCTCGGAATTACTGGGCGTAAAGGGTCCGCAGGCGGGTGTGTAAGTCGGATGTGAAAGCCCAGGGCTCAACCCTGGAACTGCATTCGAAACTGCACACCTTGAGTACGGGAGAGGGAAGCGGAATTCCTGGTGTAGAGGTGAAATTCGTAGATATCAGGAGGAACACCCGTGGCGAAAGCGGCTTCCTGGCCCGATACTGACGCTCATGGACGAAAGCG	Late-Summer	0.373187	2.39866e-09		Proteobacteria_5048			Bacteria	Proteobacteria														Late-Summer	NA	NA	NA			Late-Summer	Summer	0.244292	0.000309087
CGTTATTCGGAATCACTGGGCTTAAAGGGTGCGTAGGCGGCTACAAAGGTCAGATGTGAAATCCCACGGCTCAACCGTGGAACTGCGTCTGAAACCATGTAGCTTGAGGAAGTCAGAGGTAAGCGGAACTGATGGTGGAGCGGTGAAATGCGTTGATATCATCAGGAACACCGGTGGCGAAAGCGGCTTACTGGGACTTTTCTGACGCTGAGGCACGAAAGCT	Late-Summer	0.372403	2.60576e-09		Planctomycetes_45			Bacteria	Planctomycetes	PVC group	Planctomycetia	Pirellulales	Pirellulaceae	Mariniblastus	Mariniblastus fucicola		Mariniblastus fucicola						Late-Summer	Early-Summer	0.330991	7.33e-05			Late-Summer	Summer	0.399642	1.30556e-09
GGTTATTCATGATGATTGGGTGTAAAGCAGGATAAGGTGATAAGTACAAGTTTCAAGTCGACCAAAAGCTTAACTTAAGGGAGGATTTGAAAAACTAACTTAATAGAGGAATTACAGAGTTGAAAGCGGAACTATTGGGGTAGAGGTGTAATTCGTTTCATCTCAATGGGAACACCGAAAGCGAAAAGCAGCCAACTAATAATTACCTGCCACTAGACCTGGAATCT	Late-Summer	0.371335	2.91573e-09		Proteobacteria_3590			Bacteria	Proteobacteria		Betaproteobacteria			Candidatus Nasuia	Candidatus Nasuia deltocephalinicola		Candidatus Nasuia deltocephalinicola						Late-Summer	Early-Summer	0.271488	0.00127755			Late-Summer	Summer	0.411888	3.59464e-10
CGTTAATCGGAATTACTGGGCGTAAAGCGCGCGTAGGCGGCTTGTTAAGTCAGATGTGAAAGCCCCGGGCTCAACCTGGGAATTGCATTTGAAACTGGCAGGCTAGAGTGCAGTAGAGGAAGGTGGAATTCAGGGTGTAGCGGTGAAATGCGTAGATATCCTGAGGAACACCGGTGGCGAAGGCGGCCTTCTGGACTGACACTGACGCTGAGGTGCGAAAGCG	Late-Summer	0.369984	3.35931e-09		Proteobacteria_6904			Bacteria	Proteobacteria		Gammaproteobacteria	Oceanospirillales	Alcanivoracaceae				Alcanivoracaceae						Late-Summer	NA	NA	NA			Late-Summer	Summer	0.306626	4.88094e-06
TGTTATCCGGAATCACTGGGCGTAAAGCGTCTGTAGGTGGTTTAGTAAGTCGACTGTTAAATCTTGGGGCTCAACCTCAAAATCGCATTCGAAACTACTAGACTTGAGTATAGTAGAGGTAAAGGGAATTTCCAGTGGAGCGGTGAAATGCGTAGATATTGGAAAGAACACCGATGGCGAAGGCACTTTACTGGGCTATTACTGACACTCAGAGACGAAAGCT	Late-Summer	0.367836	4.20179e-09		Cyanobacteria_148			Bacteria	Cyanobacteria	Cyanobacteria/Melainabacteria group		Synechococcales					Synechococcales						Late-Summer	Early-Summer	0.444095	4.87e-08			Late-Summer	Summer	0.486757	3.94756e-14
CGTTATCCGGAATCACTGGGTTTAAAGGGTGCGTAGGCGGTTATGTAAGTCAGAGGTGAAATGTCGTCGCTTAACGATGAAATTGCCTTTGATACTGCTTAACTTGAATCAGAATGAGGTTGGCGGAATGTGACATGTAGCGGTGAAATGCATAGATATGTCATGGAACACCGATTGCGAAGGCAGCTGACTGGCACTAGATTGACGCTGAGGCACGAAAGCG	Late-Summer	0.365592	5.29966e-09		Bacteroidetes_223			Bacteria	Bacteroidetes	FCB group	Saprospiria	Saprospirales	Haliscomenobacteraceae	Haliscomenobacter	Haliscomenobacter hydrossis	Haliscomenobacter hydrossis DSM 1100	Haliscomenobacter hydrossis DSM 1100						Late-Summer	Late-Summer	0.280704	0.000853498			Late-Summer	Summer	0.407594	5.68393e-10
CGTTATCCGGAATCATTGGGTTTAAAGGGTCCGTAGGCGGGCAATTAAGTCAGAGGTGAAAGTCTGCGGCTCAACCGTAGAACTGCCTTTGAAACTGGTTGTCTTGAATCGTTGTGAAGTGGTTAGAATGAGCAGTGTAGCGGTGAAATGCTTAGAGATTGCTCAGAATACCGATTGCGAAGGCAGATCACTAACAACGTATTGACGCTGAGGGACGAAAGCG	Late-Summer	0.365338	5.43966e-09		Bacteroidetes_1039			Bacteria	Bacteroidetes	FCB group	Flavobacteriia	Flavobacteriales	Flavobacteriaceae				Flavobacteriaceae						Late-Summer	Late-Summer	0.315258	0.000165708			Late-Summer	Summer	0.255998	0.000152915
TGTTATTCGGAATAATTGGGCGTAAAGGGCGTGTAGGCGGTTGTTTGCAGTTGTTTGTGACAGCCCAAGGCTCACCCTTGGTTTTGCAGACAAAACGAGGCAACTAGAGTCTGAAAGAGGAGACCAGAATTTCTAGTGGAGAGGTTAAATTCTTAGAGATTAGAAGGAATACCAAAAGCGAAGGCAAGTCTCTGGTTCATGACTGACGCTGAGGCGCGAAAGCG	Late-Summer	0.362354	7.38433e-09		Proteobacteria_5170			Bacteria	Proteobacteria		Alphaproteobacteria	Rickettsiales	Anaplasmataceae	Wolbachia			Wolbachia						Late-Summer	Early-Summer	0.380304	4.2e-06			Late-Summer	Summer	0.474981	1.9267e-13
CGTTATCCGGAATCACTGGGTTTAAAGGGTGCGTAGGCGGTTAGATAAGTCAGAGGTGAAAGCCCACAGCTCAACTGTGGAATTGCCTTTGATACTGTATAACTTGAATCAGGTTGAGGTTGGCGGAATGTGACATGTAGCGGTGAAATGCATAGATATGTCATAGAACACCAATTGCGAAGGCAGCTAACTAGACCTGTATTGACGCTGAGGCACGAAAGCG	Late-Summer	0.359631	9.7328e-09		Bacteroidetes_223			Bacteria	Bacteroidetes	FCB group	Saprospiria	Saprospirales	Haliscomenobacteraceae	Haliscomenobacter	Haliscomenobacter hydrossis	Haliscomenobacter hydrossis DSM 1100	Haliscomenobacter hydrossis DSM 1100						Late-Summer	Early-Summer	0.401795	1.04e-06			Late-Summer	Summer	0.380322	9.00256e-09
CGTTGTTCGGAATTACTGGGCGTAAAGCGCGCGTAGGCGGTTAGTCTAGTCAGGCGTGAAATCCCGGGGCTCAACCCCGGAACTGCGCTTGATACTGGCTTACTAGAGGTCTGGAGAGGGTAGTGGAATTCCCAGTGTAGAGGTGAAATTCGTAGATATTGGGAAGAACACCAGCGGCGAAGGCGGCTACCTGGACAGATACTGACGCTGAGGTGCGAAAGCG	Late-Summer	0.359593	9.76969e-09		Proteobacteria_6456			Bacteria	Proteobacteria		Alphaproteobacteria						Alphaproteobacteria						Late-Summer	Late-Summer	0.237563	0.00502188			Late-Summer	Summer	0.289248	1.71728e-05
CGTTAATCGGAATTACTGGGCGTAAAGCGTGCGCAGGCGGTTTTGTAAGTCAGATGTGAAATCCCCGAGCTTAACTTGGGAACTGCGTTTGAAACTACAAGACTAGAGTGTGTCAGAGGGGGGTAGAATTCCACGTGTAGCAGTGAAATGCGTAGAGATGTGGAGGAATACCAATGGCGAAGGCAGCCCCCTGGGATAACACTGACGCTCATGCACGAAAGCG	Late-Summer	0.355918	1.41232e-08		Proteobacteria_2798			Bacteria	Proteobacteria		Betaproteobacteria	Nitrosomonadales	Methylophilaceae				Methylophilaceae						Late-Summer	Fall/Winter	0.321541	0.000120294			Late-Summer	Summer	0.42452	8.98733e-11
CGTTATCCGGAATTATTGGGCGTAAAGTGTTTGTAGGCGGTATTTGTTGTTATATATCAAATTCTAGGTTTGTTGCTTAGGTCTATATATAATACTCTTTTACTTGAGTCGGGCAGGGGACAATAGAATTTCATACATAGGAGTGAAATCCAACCATTTATGAAGGAATGCCATTAGCGAAAGCGATTGTCTGGGCCTGTTACTGACGCTGAGAAACGAAAGCA	Late-Summer	0.353237	1.84248e-08		Proteobacteria_3590			Bacteria	Proteobacteria		Betaproteobacteria			Candidatus Nasuia	Candidatus Nasuia deltocephalinicola		Candidatus Nasuia deltocephalinicola						Late-Summer	Late-Summer	0.292331	0.000502929			Late-Summer	Summer	0.374365	1.59279e-08
CGTTATCCGGAATCACTGGGTTTAAAGGGTGCGTAGGCGGTTAGGTAAGTCAGAGGTGAAAGGTTGTCGCTTAACGATAAAATGGCCTTTGATACTGCTTGACTAGAATTAGGTTGAGGTAGGCGGAATGCGTCATGTAGCGGTGAAATGCATAGATATGACGTAGAACACCGATTGCGAAGGCAGCTTACTGGACCTATATTGACGCTGAGGCACGAAAGCG	Late-Summer	0.346706	3.48534e-08		Bacteroidetes_223			Bacteria	Bacteroidetes	FCB group	Saprospiria	Saprospirales	Haliscomenobacteraceae	Haliscomenobacter	Haliscomenobacter hydrossis	Haliscomenobacter hydrossis DSM 1100	Haliscomenobacter hydrossis DSM 1100						Late-Summer	Late-Summer	0.2668	0.00156031			Late-Summer	Summer	0.229814	0.000704941
CGTTAATCGGAATTACTGGGCGTAAAGCGCGCGTAGGTGGCTAAGTCAGTCAGATGTGAAAGCCCCGGGCTCAACCTGGGAACTGCACCTGATACTGCTTGGCTAGAGTACAATAGAGGGGAGTGGAATTTCCGGTGTAGCGGTGAAATGCGTAGAGATCGGAAGGAACACCAGTGGCGAAGGCGACTCCCTGGATTGATACTGACACTGAGGTGCGAAAGCG	Late-Summer	0.346606	3.51931e-08		Proteobacteria_6944			Bacteria	Proteobacteria		Gammaproteobacteria	Oceanospirillales	Oceanospirillaceae	Marinobacterium	Marinobacterium sp. LSUCC0821		Marinobacterium sp. LSUCC0821						Late-Summer	Early-Summer	0.23919	0.00472179			Late-Summer	Summer	0.269417	6.54593e-05
CGTTGTTCGGATTTACTGGGCGTAAAGGGTCCGCAGGCGGTCTTGTGTGTCGGATGTGAAAGCTCACGGCTCAACCGTGGAATTGCATTCGAAACTGCAAGACTAGAGTACTGGAGGGGAGAAGGGAACACTTGGTGTAGCGGTGAAATGCGTAGATATCAAGTGGAACACCGGAGGCGAAGGCGCTTCTCTGGACAGATACTGACGCTCATGGACGAAAGTT	Late-Summer	0.346481	3.562e-08		phylum_reps_417																		Late-Summer	Fall/Winter	0.204198	0.0162908			Late-Summer	Summer	0.419204	1.62187e-10
CGTTATCCGGATTTATTGGGTTTAAAGGGTCCGTAGGCGGATCATTAAGTCAGTGGTGAAAGCCGGCAGCTCAACTGTCGAACTGCCATTGATACTGATGATCTTGAATACGGTTGAAGTTGGCGGAATAGGTCATGTAGCGGTGAAATGCTTAGATATGACCTAGAACACCGATTGCGAAGGCAGCCAACTAAGCCGTTATTGACGCTGAGGGACGAAAGCG	Late-Summer	0.344173	4.44566e-08		Bacteroidetes_518			Bacteria	Bacteroidetes	FCB group	Flavobacteriia	Flavobacteriales	Schleiferiaceae	Owenweeksia	Owenweeksia hongkongensis	Owenweeksia hongkongensis DSM 17368	Owenweeksia hongkongensis DSM 17368						Late-Summer	Early-Summer	0.322583	0.000113991			Late-Summer	Summer	0.341243	3.10191e-07
CGTTATCCGGAATCATTGGGTTTAAAGGGTCCGTAGGTGGTTAATTAAGTCAGAGGTGAAAGCCTATCGCTCAACGATAGAACTGCCTTTGATACTGATTAACTTGAGTTATTGTGAAGTAGTTAGAATATGTAGTGTAGCGGTGAAATGCATAGATATTACATAGAATACCGATTGCGAAGGCAGATTACTAACAATACACTGACACTGAGGGACGAAAGCG	Late-Summer	0.3441	4.47688e-08		Bacteroidetes_1027			Bacteria	Bacteroidetes	FCB group	Flavobacteriia	Flavobacteriales	Flavobacteriaceae				Flavobacteriaceae						Late-Summer	Early-Summer	0.417247	3.56e-07			Late-Summer	Summer	0.366787	3.23753e-08
CGTTAATCGGAATTACTGGGCGTAAAGCGCGCGTAGGCGGTTTGTTAAGTGAGATGTGAAAGCCCAGGGCTCAACCTTGGAACTGCATCTCATACTGGCAGGCTAGAGTACGGTAGAGGGGGGTAGAATTCCACGTGTAGCGGTGAAATGCGTAGAGATGTGGAGGAATACCAGTGGCGAAGGCGGCCCCCTGGATCGATACTGACGCTGAGGTGCGAAAGCG	Late-Summer	0.342313	5.3083e-08		Proteobacteria_6782			Bacteria	Proteobacteria		Gammaproteobacteria			Pseudohongiella	Pseudohongiella spirulinae		Pseudohongiella spirulinae						Late-Summer	Late-Summer	0.683957	2.34e-20			Late-Summer	Fall/Winter2019	0.351838	1.24459e-07
CGTTAATCGGAATTACTGGGCGTAAAGAGCGCGTAGGTGGTCTACTAAGTCATGTGTGAAAGCCCCGAGCTTAACTTGGGAATTGCACGTGATACTGGTAGTCTAGAGTATGGTAGAGGGAAGTGGAATTTCCGGTGTAGCGGTGAAATGCATAGATATCGGAAGGAACACCAGTGGCGAAGGCGACTTCCTGGGCCAATACTGACACTGAGGCGCGAAAGCG	Late-Summer	0.339131	7.17066e-08		Proteobacteria_6626			Bacteria	Proteobacteria		Gammaproteobacteria						Gammaproteobacteria						Late-Summer	Late-Summer	0.255808	0.0024595			Late-Summer	Summer	0.341237	3.10337e-07
CGTTGTTCGGAATTACTGGGCGTAAAGGGCGCGTAGGCGGTCCTTTAAGTTAGGCGTGAAAGCCCCGGGCTCAACCTGGGAACTGCGCTTAATACTGAGGGACTAGAAAACGGAAGAGGGTAGTGGAATTCCCAGTGTAGAGGTGAAATTCGTAGATATTGGGAAGAACACCAGTGGCGAAAGCGGCTACCTGGTCCGATTTTGACGCTGAGGCGCGAAAGCG	Late-Summer	0.337379	8.44914e-08		Proteobacteria_6566			Bacteria	Proteobacteria	SAR116 cluster	Alphaproteobacteria			Candidatus Puniceispirillum	Candidatus Puniceispirillum marinum	Candidatus Puniceispirillum marinum IMCC1322	Candidatus Puniceispirillum marinum IMCC1322						Late-Summer	Fall/Winter	0.568401	3.55e-13			Late-Summer	Fall/Winter	0.136895	0.0454675
CGTTGCTCGGAATCACTGGGCGTAAAGGGTGCGCAGGCGGTTCATTAAGTCAGATGTGAAAGCCCGGGGCTCAACCCCGGAACTGCATCTGAAACTGGCGAACTTGAGTATGAGAGAGGAAAGTGGAATTCCTGGTGTAGAGGTGAAATTCGTTGATATCAGGAGGAACATCAGTGGCGAAGGCGACTTTCTGGCTCATAACTGACGCTCATGCACGAAAGTG	Late-Summer	0.337216	8.57883e-08		Proteobacteria_6570			Bacteria	Proteobacteria		Alphaproteobacteria	Magnetococcales	Magnetococcaceae	Magnetococcus	Magnetococcus marinus	Magnetococcus marinus MC-1	Magnetococcus marinus MC-1						Late-Summer	Early-Summer	0.264628	0.00170971			Late-Summer	Summer	0.267579	7.37209e-05
CGTTATCCGGAATTATTGGGTTTAAAGGGTCCGCAGGCTGTTTGTTAAGTCAGGGGTGAAATCCTACCGCTCAACGGTAGAACTGCCTTTGATACTGGCAAACTTGAGTTATTGTGAAGTAGTTAGAATGTGTAGTGTAGCGGTGAAATGCATAGATATTACACAGAATACCGATTGCGAAAGCAGATTACTAACAATATACTGACGCTGAGGGACGAAAGCG	Late-Summer	0.336459	9.20583e-08		Bacteroidetes_1110			Bacteria	Bacteroidetes	FCB group	Flavobacteriia	Flavobacteriales	Flavobacteriaceae				Flavobacteriaceae						Late-Summer	Late-Summer	0.570836	2.67e-13			Late-Summer	Fall/Winter	0.26689	7.70651e-05
CGTTGTTCGGAATTATTGGGCGTAAAGCGTGCGTAGGCGGACTGTTAAGTCTGGTGTGAAATCCCTCGGCTCAACCGAGGACGTGCATTGGATACTGGCAGTCTTGAGTCCTGGAGAGGAGAGCGGAATTCCTAGTGTAGAGGTGAAATTCGTAGATATTAGGAGGAACACCAGCGGCGAAAGCGGCTCTCTGGACAGTGACTGACGCTGAGGCACGAAAGCA	Late-Summer	0.334733	1.08052e-07		Proteobacteria_4273			Bacteria	Proteobacteria		Deltaproteobacteria	Desulfarculales	Desulfarculaceae	Desulfarculus	Desulfarculus baarsii	Desulfarculus baarsii DSM 2075	Desulfarculus baarsii DSM 2075						Late-Summer	NA	NA	NA			Late-Summer	Summer	0.294893	1.15145e-05
CGTTGTTCGGAATTACTGGGCGTAAAGCGCACGTAGGCGGGTCATTAAGTCAGATGTGAAATCCCAAGGCTCAACCTTGGAACTGCATTTGAAACTGATAGCCTAGAGATCAGGAGAGGTTAGCGGAATACCGAGTGTAGAGGTGAAATTCGTAGATATTCGGTGGAACACCAGTGGCGAAGGCGGCTAACTGGACTGATACTGACGCTGAGGTGCGAAAGTG	Late-Summer	0.33417	1.13821e-07		Proteobacteria_6098			Bacteria	Proteobacteria		Alphaproteobacteria	Hyphomonadales	Hyphomonadaceae	Hyphomonas	Hyphomonas sp. Mor2		Hyphomonas sp. Mor2						Late-Summer	NA	NA	NA			Late-Summer	Summer	0.398188	1.51625e-09
CGTTAATCGGAATTACTGGGCGTAAAGCGCATGCAGGTGGTCTGTTAAGCAAGATGTGAAAGCCCGGGGCTCAACCTCGGAACAGCATTTTGAACTGGCAGACTAGAGTACTGTAGAGGGGGGTAGAATTTCAGGTGTAGCGGTGAAATGCGTAGAGATCTGAAGGAATACCGGTGGCGAAGGCGGCCCCCTGGACAGATACTGACACTCAGATGCGAAAGCG	Late-Summer	0.330279	1.62625e-07		Proteobacteria_1021			Bacteria	Proteobacteria		Gammaproteobacteria	Vibrionales	Vibrionaceae	Vibrio	Vibrio astriarenae		Vibrio astriarenae						Late-Summer	Early-Summer	0.433358	1.1e-07			Late-Summer	Summer	0.420391	1.42292e-10
CGTTATCCGGAATGATTGGGCGTAAAGCGTCTGTAGGTGGCTTCCCAAGTCAACTGTCAAAAATCAGGGCTTAACCTTGAGCCGGCAGTTGAAACTATGAAGCTTGAGTTAGGTAGGGGCAGAGGGAATTCCTAGTGTAGCGGTGAAATGCGTAGATATTAGGAAGAACACCGATCGCGAAAGCACTCTGCTGGGCCATGACTGACACTGAGAGACGAAAGCT	Late-Summer	0.328205	1.96292e-07		Cyanobacteria_114			Bacteria	Cyanobacteria	Cyanobacteria/Melainabacteria group		Nostocales					Nostocales						Late-Summer	Early-Summer	0.525696	3.58e-11			Late-Summer	Summer	0.37111	2.16499e-08
CGTTATCCGGATTTATTGGGTTTAAAGGGTCCGTAGGCGGATCATTAAGTCAGTGGTGAAAGCCGGCAGCTCAACTGTCGAACTGCCATTGATACTGATGATCTTGAATATGGTTGAAGTTGGCGGAATAGGTCATGTAGCGGTGAAATGCTTAGATATGACCTAGAACACCGATTGCGAAGGCAGCCAACTAAACCATCATTGACGCTGAGGGACGAAAGCG	Late-Summer	0.323218	3.06844e-07		Bacteroidetes_518			Bacteria	Bacteroidetes	FCB group	Flavobacteriia	Flavobacteriales	Schleiferiaceae	Owenweeksia	Owenweeksia hongkongensis	Owenweeksia hongkongensis DSM 17368	Owenweeksia hongkongensis DSM 17368						Late-Summer	Early-Summer	0.290676	0.000543001			Late-Summer	Summer	0.284674	2.35944e-05
CGTTAATCGGAATTACTGGGCGTAAAGCGCGCGTAGGCGGTTTGTTAAGTGTGATGTGAAAGCCCAGGGCTCAACCTTGGAACTGCATCACATACTGGCAGGCTAGAGTACGGTAGAGGGGGGTAGAATTCCACGTGTAGCGGTGAAATGCGTAGAGATGTGGAGGAATACCAGTGGCGAAGGCGGCCCCCTGGATCGATACTGACGCTGAGGTGCGAAAGCG	Late-Summer	0.317972	4.867e-07		Proteobacteria_6782			Bacteria	Proteobacteria		Gammaproteobacteria			Pseudohongiella	Pseudohongiella spirulinae		Pseudohongiella spirulinae						Late-Summer	Early-Summer	0.333102	6.55e-05			Late-Summer	Summer	0.459244	1.46085e-12
CGTTACTCGGAATTACTGGGCGTAAAGCGAGCGCAGGCGGCTTATTAAGTCAGGTGTGAAAGCCCGGGGCTCAACCCCGGAACTGCACCTGAAACTGGTAGGCTTGAGGATGAGAGAGGAAAGTAGAATTTCTGGTGTAGAGGTGAAATTCGTTGATATCAGAAGGAATACCCGTGGCGAAGGCGGCTTTCTGGCTCATTTCTGACGCTGAGGCTCGAAAGTG	Late-Summer	0.317919	4.88959e-07		Proteobacteria_4268			Bacteria	Proteobacteria		Deltaproteobacteria	Syntrophobacterales	Syntrophobacteraceae				Syntrophobacteraceae						Late-Summer	NA	NA	NA			Late-Summer	Summer	0.25989	0.000120113
CGTTAATCGGAATTACTGGGCGTAAAGCGCGCGTAGGCGGTTTTTTAAGTCGGATGTGAAAGCCCCGGGCTCAACCTGGGAATTGCATCCGATACTGGATAACTAGAATGCGGGAGAGGGAGGTAGAATTCCATGTGTAGCAGTGAAATGCGTAGATATATGGAGGAATACCAGTGGCGAAGGCGGCCTCCTGGCTCGACATTGACGCTGAGGTGCGAAAGCG	Late-Summer	0.314507	6.56996e-07		Proteobacteria_1589			Bacteria	Proteobacteria		Gammaproteobacteria	Cellvibrionales	Halieaceae	Halioglobus	Halioglobus pacificus		Halioglobus pacificus						Late-Summer	Late-Summer	0.253043	0.00274951			Late-Summer	Summer	0.231262	0.000650602
CGTTACTCGGATTTACTGGGCGTAAAGGGTGAGCAGGCGGCCAAGTGTGTCAGGTGTGAAATCCCGGGGCTTAACCCCGGAACTGCGCCTGAAACTACTTGGCTAGAGTCTCGGAGAGGACAGTGGAATTCTAGGTGTAGCGGTGAAATGCGTAGATATCTAGAGGAACACCAGTGGCGAAGGCGACTGTCTGGACGAGTACTGACGCTCAATCACGAAAGCG	Late-Summer	0.29992	2.22911e-06		Verrucomicrobia_5			Bacteria	Verrucomicrobia	PVC group	Opitutae	Puniceicoccales	Puniceicoccaceae	Coraliomargarita	Coraliomargarita akajimensis	Coraliomargarita akajimensis DSM 45221	Coraliomargarita akajimensis DSM 45221						Late-Summer	NA	NA	NA			Late-Summer	Summer	0.171024	0.0122208
CGTTATCCGGATTTATTGGGTTTAAAGGGTCCGTAGGCGGGTCATTAAGTCAGTAGTGAAATCCTACAGCTCAACTGTAGAACTGCCATTGAAACTGATGACCTTGAATATAATTGAAGTGGGCGGAATGTGTCATGTAGCGGTGAAATGCTTAGATATGACACAGAACACCGATTGCGAAGGCAGCTCACTAAGTTATTATTGACGCTGAGGGACGAAAGCG	Late-Summer	0.296134	3.02847e-06		Bacteroidetes_518			Bacteria	Bacteroidetes	FCB group	Flavobacteriia	Flavobacteriales	Schleiferiaceae	Owenweeksia	Owenweeksia hongkongensis	Owenweeksia hongkongensis DSM 17368	Owenweeksia hongkongensis DSM 17368						Late-Summer	Late-Summer	0.330028	7.72e-05			Late-Summer	Summer	0.246396	0.000273039
CGTTGTTCGGAATTATTGGGCGTAAAGCGTGCGTAGGCGGATTATTAAGTCTGATGTGAAATCCCTCGGCTCAACCGAGGACCTGCATTGGATACTGGTAGTCTTGAGTCCCGGAGAGGATAGCGGAATTCCTAGTGTAGAGGTGAAATTCGTAGATATTAGGAGGAACACCAGTGGCGAAAGCGGCTATCTGGACGGTGACTGACGCTGAGGCACGAAAGCA	Late-Summer	0.293636	3.69826e-06		Proteobacteria_4368			Bacteria	Proteobacteria		Deltaproteobacteria	Myxococcales					Myxococcales						Late-Summer	NA	NA	NA			Late-Summer	Summer	0.207528	0.00227787
CGTTAATCGGAATTACTGGGCGTAAAGCGCGCGTAGGTGGTTTTGTCAGTCAGATGTGAAAGCCCAGGGCTCAACCTTGGAACTGCACCTGATACTGCAAGACTAGAGTACAATAGAGGGGAGTGGAATTTCCGGTGTAGCGGTGAAATGCGTAGAGATCGGAAGGAACACCAGTGGCGAAGGCGACTCCCTGGATTGATACTGACACTGAGGTGCGAAAGCG	Late-Summer	0.291636	4.3341e-06		Proteobacteria_6944			Bacteria	Proteobacteria		Gammaproteobacteria	Oceanospirillales	Oceanospirillaceae	Marinobacterium	Marinobacterium sp. LSUCC0821		Marinobacterium sp. LSUCC0821						Late-Summer	Early-Summer	0.216776	0.0106547			Late-Summer	Summer	0.28976	1.6567e-05
TGTTCATCGGAATGACTGGGCGTGAAGGGTGTCTAGGCGGAGGCGCACTCATCGGGTTAAAGCCCTGGAAGAATCGAGGAGAAGCTCGGTGAAAGGCGCACTCATGGGTCTGGGAGAGGAGGACGGAAGGCTCGAGGAAGCGGTGTAATGCAGTGATCTCGAGTCGAAGGCCAATGAGCGAAGGCTGTCCTCTGGCCCAGCACCGACGCTGACGCACGAAAGCG	Late-Summer	0.290058	4.90764e-06		Spirochaetes_45			Bacteria	Spirochaetes		Spirochaetia	Brachyspirales	Brachyspiraceae	Brachyspira			Brachyspira						Late-Summer	Early-Summer	0.209267	0.0137664			Late-Summer	Summer	0.304639	5.65934e-06
CGTTATCCGAATTTACTGGGTTTAAAGGGTGTGTAGGCGGTTTTTTAAGTCAGTGGTGAAAGCCTAGTGCTTAACATTAGAAATGCTATTGAAACTGGAAAACTTGAATCAAAGAGAGGTAAGTAGAATTTATAGTGTAGCAGTGAAATGCTTAGATACTATAAGGAATACCGATAGCGAAAGCAGCTTGCTGGCTTTGTATTGACGCTGAGACACGAAAGCA	Late-Summer	0.279534	1.10335e-05		Bacteroidetes_118			Bacteria	Bacteroidetes	FCB group	Cytophagia	Cytophagales	Amoebophilaceae	Candidatus Amoebophilus	Candidatus Amoebophilus asiaticus	Candidatus Amoebophilus asiaticus 5a2	Candidatus Amoebophilus asiaticus 5a2						Late-Summer	Late-Summer	0.231157	0.00637524			Late-Summer	Summer	0.27994	3.25917e-05
CGTTACTCGGATTCACTGGGCGTAAAGGGTGAGTAGGCGGCCAAGTATGTCGGGTGTGAAATCCCGGGGCTTAACCCCGGAACTGCGCTCGAAACTACTTGGCTAGAGTCTCGGAGAGGATAGTGGAATTCCAGGTGTAGCGGTGAAATGCGTAGATATCTGGAGGAACACCAGTGGCGAAGGCGACTGTCTGGACGAGAACTGACGCTCAATCACGAAAGCG	Late-Summer	0.268494	2.49295e-05		Verrucomicrobia_5			Bacteria	Verrucomicrobia	PVC group	Opitutae	Puniceicoccales	Puniceicoccaceae	Coraliomargarita	Coraliomargarita akajimensis	Coraliomargarita akajimensis DSM 45221	Coraliomargarita akajimensis DSM 45221						Late-Summer	NA	NA	NA			Late-Summer	Summer	0.248371	0.00024279
CGTTATCCGGAATCATTGGGCGTAAAGCGCCTGTAGGTTGTTTAGTAAGTTTGTTGTTAAAGACTAGGGCTTAACCCTAGAAAAGCAATGAAAACTGCTAGACTAGAGTATGGCAGGGGTAGAGGGAATTTCTAGTGTAGCGGTGAAATGCGTAGATATTAGAAAGAACACCGGTGGCGAAAGCGCTCTACTGGACCATTACTGACACTCAGAGGCGAAAGCT	Late-Summer	0.264912	3.2233e-05		Cyanobacteria_135			Bacteria	Cyanobacteria	Cyanobacteria/Melainabacteria group													Late-Summer	Late-Summer	0.367319	9.35e-06			Late-Summer	Summer	0.262782	0.000100143
CGTTACTCGGAATTACTGGGCGTAAAGGGAGCGCAGGCGGTCTATTAAGTCAGGTGTGAAAGCCCAGGGCTCAACCCTGGAACTGCACCTGAAACTGGTAGACTTGAGGATGAGAGAGGAAAGTAGAATTTCTGGTGTAGAGGTGAAATTCGTTGATATCAGAAGGAATACCCGTGGCGAAGGCGGCTTTCTGGCTCATTTCTGACGCTGAGGCTCGAAAGTG	Late-Summer	0.262484	3.82859e-05		Proteobacteria_5219			Bacteria	Proteobacteria		Alphaproteobacteria						Alphaproteobacteria						Late-Summer	Early-Summer	0.271206	0.00129319			Late-Summer	Summer	0.310938	3.52707e-06
CGTTACTCGGATTCACTGGGCGTAAAGGGTGCGTAGGCCGCTAAGTGTGTTAGGTGTGAAATCTCGGGGCTCAACCTCGAAACTGCGCCTAAAACTGCTTAGCTAGAGTATTAGAGAGGTAAGCGGAATTTCTGGTGTAGCGGTGAAATGCGTAGATATCAGAAGGAACACCAATGGCGAAGGCAGCTTACTGGATAATTACTGACGCTGAGGCACGAAAGCA	Late-Summer	0.259008	4.8843e-05		Verrucomicrobia_5			Bacteria	Verrucomicrobia	PVC group	Opitutae	Puniceicoccales	Puniceicoccaceae	Coraliomargarita	Coraliomargarita akajimensis	Coraliomargarita akajimensis DSM 45221	Coraliomargarita akajimensis DSM 45221						Late-Summer	Early-Summer	0.380036	4.28e-06			Late-Summer	Summer	0.319606	1.80738e-06
CGTTATCCGGATTTATTGGGTTTAAAGGGTCCGTAGGTGGACCATTAAGTCAGAAGTGAAATCCCGCGGCTCAACCGCGGAACTGCTTTTGAAACTGATGGTCTTGAGTGTGCTCGAAGTTGGCGGAATATGACATGTAGCGGTGAAATGCTTAGATATGTCATAGAACACCGATTGCGAAGGCAGCCAACTAGGTCACAACTGACACTGAGGGACGAAAGCG	Late-Summer	0.257347	5.48015e-05		Bacteroidetes_1149			Bacteria	Bacteroidetes	FCB group	Flavobacteriia	Flavobacteriales	Crocinitomicaceae	Fluviicola	Fluviicola taffensis	Fluviicola taffensis DSM 16823	Fluviicola taffensis DSM 16823						Late-Summer	Early-Summer	0.383968	3.33e-06			Late-Summer	Summer	0.30828	4.31181e-06
CGTTGTTCGGAATAACTGGGCGTAAAGCGTGTGTAGGCTGCGCGGAAAGTCAGATGTGAAAGCCCGAGGCTCAACCTCGGAACTGCACCTGATACTCCCGTGCTAGAGTAATGGAGAGGTAAGTGGAATTCTCGGTGTAGCAGTGAAATGCGTAGATATCGAGAGGAACATCAATGGCGAAGGCAACTTACTGGACATTTACTGACGCTCAGACACGAAGGCT	Late-Summer	0.256399	5.85052e-05		Verrucomicrobia_27			Bacteria	Verrucomicrobia	PVC group	Verrucomicrobiae	Verrucomicrobiales					Verrucomicrobiales						Late-Summer	Early-Summer	0.28636	0.000661726			Late-Summer	Summer	0.264074	9.22676e-05
CGTTAATCGGAATTACTGGGCGTAAAGCGCATGCAGGTGGTTTGTTAAGTCAGATGTGAAAGCCCGGGGCTCAACCTCGGAATAGCATTTGAAACTGGCAGACTAGAGTACTGTAGAGGGGGGTAGAATTTCAGGTGTAGCGGTGAAATGCGTAGAGATCTGAAGGAATACCGGTGGCGAAGGCGGCCCCCTGGACAGATACTGACACTCAGATGCGAAAGCG	Late-Summer	0.252306	7.73594e-05		Proteobacteria_1128			Bacteria	Proteobacteria		Gammaproteobacteria	Vibrionales	Vibrionaceae	Vibrio	Vibrio alginolyticus		Vibrio alginolyticus						Late-Summer	Late-Summer	0.345435	3.33e-05			Late-Summer	Summer	0.262624	0.000101148
CGTTATCCGGAATCACTGGGCATAAAGCGTCTGTAGGTGGTTTGGTAAGTCTGCTGTTAAAGACTGGGGCTCAACCCCAGAAAAGCAGTGGAAACTGCCAGACTCGAGTGTGGTAGAGGTAGAGGGAATTCCTAGTGTAGCGGTGAAATGCGTAGATATTAGGAAGAACACCAATGGCGAAGGCACTCTACTGGGCCATAACTGACACTGAGAGACGACAGCT	Late-Summer	0.249913	9.08886e-05		Cyanobacteria_154			Bacteria	Cyanobacteria	Cyanobacteria/Melainabacteria group		Chroococcales					Chroococcales						Late-Summer	Early-Summer	0.270152	0.00135297			Late-Summer	Summer	0.347258	1.85473e-07
CGTTAATCGGAATTACTGGGCGTAAAGCGTGCGTAGGCGGAAAAGTAAGTCAGATGTGAAAGCCCTAGGCTCAACCTAGGAATAGCATTTGAAACTGCAGTTCTAGAGCAGAATAGAGGAGAGTAGAATTTCAGGTGTAGCGGTGAAATGCGTAGATATCTGAAGGAATACCAGTGGCGAAGGCGGCTCTCTGGATTCATGCTGACGCTGAGGCACGAAAGCG	Late-Summer	0.246554	0.000113666		Proteobacteria_2670			Bacteria	Proteobacteria								Proteobacteria						Late-Summer	NA	NA	NA			Late-Summer	Summer	0.297552	9.50978e-06
CGTTATCCGGAATCATTGGGCGTAAAGCGCCTGTAGGTTGTTTATTAAGTCTGTTGTTAAAGACTAGGGCTTAACCCTAGAAAAGCAATGGAAACTAATAGACTAGAGTATGGCAGGGGTAGAGGGAATTTCTAGTGTAGCGGTGAAATGCGTAGATATTAGAAAGAACACCGGTGGCGAAAGCGCTCTACTGGACCATTACTGACACTCAGAGGCGAAAGCT	Late-Summer	0.243565	0.000138322		Cyanobacteria_192			Bacteria	Cyanobacteria	Cyanobacteria/Melainabacteria group													Late-Summer	Early-Summer	0.57807	1.14e-13			Late-Summer	Summer	0.296536	1.02331e-05
CGTTATTCGGAATAACTGGGCGTAAAGGGTTTGTAGACGGTAAATTTTTATTAAAGGTGAAATATGGAAGCTTAACTTTCATAAGCTTTTAGATTCAATTTACTTGAGTTAGAAAGAGGATAGCAGAATTTTTCAAGTAGGGGTTAAATCCATAAATATGAAAAAGAATACCAGATGCGAAGGCGGCTATCTAGCTCTATACTGACGTTGAGGAACTAAAGCG	Late-Summer	0.233674	0.000260355		Proteobacteria_6887			Bacteria	Proteobacteria		Gammaproteobacteria	Oceanospirillales	Halomonadaceae	Candidatus Carsonella	Candidatus Carsonella ruddii		Candidatus Carsonella ruddii						Late-Summer	Early-Summer	0.288996	0.000586645			Late-Summer	Summer	0.253105	0.00018254
CGTTGTCCGGAATTATTGGGCGTAAAGAGCTCGTAGGCGGTTTGTCACGTCTGCTGTGAAAATCCAAGGCTCAACCTTGGACTTGCAGTGGGTACGGGCAGGCTAGAGTGCGGTAGGGGAGATGGGAATTCCTGGTGTAGCGGTGGAATGCGCAGATATCAGGAGGAACACCAATGGCGAAGGCACATCTCTGGGCCGTAACTGACGCTGAGGAGCGAAAGCG	Late-Summer	0.227346	0.000384884		Actinobacteria_1933			Bacteria	Actinobacteria	Terrabacteria group	Actinobacteria	Micrococcales	Microbacteriaceae	Candidatus Aquiluna	Candidatus Aquiluna sp. 15G-AUS-rot		Candidatus Aquiluna sp. 15G-AUS-rot						Late-Summer	Late-Summer	0.244434	0.0038611			Late-Summer	Summer	0.250718	0.000210921
CGTTGTTCGGAATCACTGGGCGTAAAGCGCGCGTAGGCGGATTGATTAGTTGGGGGTGAAATCCCGGGGCTCAACCTCGGAACTGCCTTCAATACTGTCAGTCTTGAGTTCGTGAGAGGTAAGTGGAATTCCGAGTGTAGAGGTGAAATTCGTAGATATTCGGAAGAACACCAGTGGCGAAGGCGACTTACTGGCACGATACTGACGCTGAGGTGCGAAAGCG	Late-Summer	0.224463	0.000458276		Proteobacteria_5628			Bacteria	Proteobacteria		Alphaproteobacteria	Rhodobacterales	Rhodobacteraceae	Labrenzia	Labrenzia sp. VG12		Labrenzia sp. VG12						Late-Summer	Fall/Winter	0.469798	6.13e-09			Late-Summer	Summer	0.266287	8.01077e-05
CGTTATTCTAAATGATTGGGCGTAAAGTGTTCGTAGGCTGTATTTGGTGTTATGCGTAAAATAATAGATTAATCTTTATTCCTGCGCGTAATACTCTTTTACTAGAGTATAACAGAGGATAATGGAATTTTATATGGAAGAGTAAAATCTAATGATATATAAAGGAATGTCAGTGGCGAAGGCAATTATCTGGGTTATTTACTGACGTTGAGGAACGAAAGTG	Late-Summer	0.201994	0.00165846		Proteobacteria_3590			Bacteria	Proteobacteria		Betaproteobacteria			Candidatus Nasuia	Candidatus Nasuia deltocephalinicola		Candidatus Nasuia deltocephalinicola						Late-Summer	NA	NA	NA			Late-Summer	Summer	0.205235	0.00255352
CGTTATCCGGATTTATTGGGTTTAAAGGGTGCGTAGGCGGGATGTCAAGTCAGCGGTGAAATCTTCTAGCTCAACTAGAAAACTGCCGTTGAAACTGATATTCTTGAGTGTAAACGAGGTAAGCGGAATGTGTCATGTAGCGGTGAAATGCTTAGAGATGACACAGAACACCAATTGCGAAGGCAGCTTACTAGGATACAACTGACGCTGAGGCACGAAAGCG	Late-Summer	0.199691	0.00187835		Bacteroidetes_483			Bacteria	Bacteroidetes	FCB group	Bacteroidia	Bacteroidales	Paludibacteraceae	Paludibacter	Paludibacter propionicigenes	Paludibacter propionicigenes WB4	Paludibacter propionicigenes WB4						Late-Summer	NA	NA	NA			Late-Summer	Summer	0.174344	0.0106161
CGTAGTTCGGATTTACTGGGCATAAAGAGCACGTAGGCGGCTCGCTCAGTCGGGTGTGAAAGCCCACGGCCCAACCGTGGAACTGCACCCGATACTGGCGAGCTCGAGGACGGAAGGGGTGAGTGGAACTCCAGGTGGAACGGTGAAATGTATAGATATCTGGAGGAACACCGGTGGCGAAAGCGGCTCACTGGTCCGTCTCTGACGCTGAGGTGCGAAAGCT	Late-Summer	0.197203	0.00214557		Planctomycetes_37			Bacteria	Planctomycetes	PVC group	Candidatus Brocadiae	Candidatus Brocadiales	Candidatus Brocadiaceae	Candidatus Kuenenia	Candidatus Kuenenia stuttgartiensis		Candidatus Kuenenia stuttgartiensis						Late-Summer	NA	NA	NA			Late-Summer	Summer	0.216961	0.0014061
TGTTCTTCGGAATGACTGGGCGTAAAGGGCACGTAGGCTGCAAGGTGGGTTACAAGTGAAAGCCCAGGGCTCAACCCTGGGAGTGCTTGTAAAACTGTTTTGCTAGGGTCAGGTAGGGGAGAGTGGAATTCCTTGTGGAGGGGTAGAATCCGTAGAGATAAGGAGGAAGGCCAAACGCGAAGGCAACTCTCTGGGCCTGTACCGACGCTGAGGTGCGAAAGCA	Late-Summer	0.193961	0.00254566		Proteobacteria_4975			Bacteria	Proteobacteria		Epsilonproteobacteria						Epsilonproteobacteria						Late-Summer	NA	NA	NA			Late-Summer	Summer	0.333742	5.80314e-07
CGTTATTCGGAATTATTGGGCGTAAAGAGTTCGTAGACGGTATTGTAAGTTAATTGTTAAAGTTTAGAGTTTAATTTTAAATTTGCAATTAATACTGCTTTACTTGAGTTTAAATTAGAAAAATAGAATTCCATGTGGAGAAGTAATATTTGTAGATATATGGAGGAATTTCAGTAGTGAAGACGATTTTTTATTAAAAACTGACGTTGAGGAACGAAAGTA	Late-Summer	0.186837	0.00367287		Proteobacteria_3590			Bacteria	Proteobacteria		Betaproteobacteria			Candidatus Nasuia	Candidatus Nasuia deltocephalinicola		Candidatus Nasuia deltocephalinicola						Late-Summer	Early-Summer	0.307557	0.00024306			Late-Summer	Summer	0.306207	5.03618e-06
CGTTATTCGGAATAATTGGGCGTAAAGGGTTCGTAGACGGTATTATAAGTTAATTAAGAAAGATTAAGGCTTAACCTTAATTAAATAATTAAAACTGTTTTACTTTGAGTTTTTTATAGAAGAATAGAATTCCGTGTGTAGAGGTGGTATTTGTAGATCTACGGAGGAATACCTAAAGCGAAGGCAATTCTTTAATAATAACTGACGTTGAGGAACGAAAGCG	Late-Summer	0.185821	0.00386591		phylum_reps_755																		Late-Summer	NA	NA	NA			Late-Summer	Summer	0.240896	0.000376734
CGTTAATCGGAATTACTGGGCGTAAAGCGCGCGTAGGTGGTTTGATAAGCTAGCTGTGAAAGCCCCGGGCTTAACCTGGGAACTGCAGTTAGAACTGTCTGACTAGAGTACAGTAGAGGGTGGCGGAATTTCCTGTGTAGCGGTGAAATGCGTAGATATAGGAAGGAACATCAGTGGCGAAGGCGGCCACCTGGACTGATACTGACACTGAGGTGCGAAAGCG	Late-Summer	0.183792	0.00427925		Proteobacteria_1595			Bacteria	Proteobacteria		Gammaproteobacteria	Oceanospirillales	Oleiphilaceae	Oleiphilus	Oleiphilus messinensis		Oleiphilus messinensis						Late-Summer	NA	NA	NA			Late-Summer	NA	NA	NA
CGTTATCCGGATTTATTAGGTTTAAAGGGTCCGCAGGCGGGATATTAAGTCAGTGGTGAAAGCCTACAGCTCAACTGTAGAACTGCCATTGATACTGATATTCTTGAGTGTGGTTGAAGTAGGCGGAACATGTCATGTAGCGGTGAAATGCATAGATATGACATAGAACACCAATTGCGAAGGCAGCTTACTAAGCCATTACTGACGCTGAGGGACGAAAGCG	Late-Summer	0.17569	0.00635599		Bacteroidetes_518			Bacteria	Bacteroidetes	FCB group	Flavobacteriia	Flavobacteriales	Schleiferiaceae	Owenweeksia	Owenweeksia hongkongensis	Owenweeksia hongkongensis DSM 17368	Owenweeksia hongkongensis DSM 17368						Late-Summer	Early-Summer	0.246506	0.0035618			Late-Summer	Summer	0.179881	0.00835025
TGTTATCCGGAATCACTGGGCGTAAAGCGTCTGTAGGTTGTTAAGCAAGTCAACTGTTAAATCTTGAGGCTCAACTTCAAAATCGCAGTCGAAACTGTTTGACTAGAGTATAGTAGGGGTAAAGGGAATTTCCAGTGGAGCGGTGAAATGCGTAGATATTGGAAAGAACACCGATGGCGAAGGCACTTTACTGGGCTATTACTGACACTCAGAGACGAAAGCT	Late-Summer	0.174221	0.00681706		Cyanobacteria_160			Bacteria	Cyanobacteria	Cyanobacteria/Melainabacteria group													Late-Summer	Early-Summer	0.302979	0.000303719			Late-Summer	NA	NA	NA
TGTTATCCGGAATCACTGGGCGTAAAGCGTCTGTAGGTTGTTTAATAAGTCAACTGTTAAATCTTAAAGCTCAACTTTGAAATCGCAGTCGAAACTATTAGACTAGAGTATAGTAGGGGTAAAGGGAATTTCCAGTGGAGCGGTGAAATGCGTAGAGATTGGAAAGAACACCGATGGCGAAGGCACTTTACTGGGCTATTACTGACACTCAGAGACGAAAGCT	Late-Summer	0.163385	0.0112452		Cyanobacteria_151			Bacteria	Cyanobacteria	Cyanobacteria/Melainabacteria group		Chroococcales	Chroococcaceae	Geminocystis	Geminocystis sp. NIES-3709		Geminocystis sp. NIES-3709						Late-Summer	NA	NA	NA			Late-Summer	Summer	0.15751	0.0211615
CGTTATTCGGAATGATTGGGCGTAAAGGGTCCGTAGGCAGCTTTTTAAGTCAGTTCTATAACTTTGTGGGCTTAACCCGAAAAGTGAACTGAAACTTTAAAGAACTACGAGTTTGAGAGGGGATAGTGGAATTCCTAGTGTAAGGATAAAATCTCTAGATATTAGGAGGAACATCAGAAGGCGAAGGCGACTATCTGGCTCAAAACTGACGCTGAGGGACGAAAGTA	Late-Summer	0.162619	0.0116377		Proteobacteria_4404			Bacteria	Proteobacteria		Oligoflexia	Bacteriovoracales					Bacteriovoracales						Late-Summer	NA	NA	NA			Late-Summer	Summer	0.286749	2.04416e-05
CGTTACTCGGAATTACTGGGCGTAAAGCGAGCGCAGGCGGCTTATTAAGTCGGGTGTGAAAGCCCGGGGCTCAACCCCGGAACTGCATTCGAAACTGATAAGCTAGAGGATGAGAGAGGAAAGTAGAATTTCTGGTGTAGAGGTGAAATTCGTTGATATCAGAAGGAATACCCGTGGCGAAGGCGGCTTTCTGGCTCATTTCTGACGCTGAGGCTCGAAAGTG	Late-Summer	0.15162	0.0187617		Proteobacteria_4405			Bacteria	Proteobacteria	0	Oligoflexia						Oligoflexia						Late-Summer	NA	NA	NA			Late-Summer	Summer	0.231013	0.000659655
CGTAGTTCGGAATTACTGGGCTTAAAGAGTTCGTAGGTGGTTAAAAAAGTTGGTGGTGAAATCCCAGAGCTTAACTCTGGAACTGCCATCAAAACTTTTTAGCTAGAGTATGATAGAGGAAAGCAGAATTTCTAGTGTAGAGGTGAAATTCGTAGATATTAGAAAGAATACCAATTGCGAAGGCAGCTTTCTGGATCATTACTGACGCTGAGGAACGAAAGCA	Fall/Winter	0.872527	5.43773e-76		Proteobacteria_5215			Bacteria	Proteobacteria		Alphaproteobacteria	Pelagibacterales	Pelagibacteraceae	Candidatus Pelagibacter	Candidatus Pelagibacter sp. FZCC0015		Candidatus Pelagibacter sp. FZCC0015						Fall/Winter	Fall/Winter	0.780818	1.43e-29			Fall/Winter	Fall/Winter	0.869057	1.00326e-66
CGTTATTCGGAATTACTGGGCGTAAAGCGAGCGTAGGCGGATTTGTAAGTTGGAGGTGAAATCCCAGAGCTTAACTCTGGAACTGCCTTCAAAACTACATTTCTTGAGTTTGGTAGAGGAGAGTGGAATTCCTAGTGTAGAGGTGAAATTCGTAGATATTAGGAGGAACACCAGTGGCGAAGGCGACTCTCTGGGCCAATACTGACGCTGAGGTTCGAAAGCA	Fall/Winter	0.842712	6.06665e-66		Proteobacteria_6102			Bacteria	Proteobacteria		Alphaproteobacteria	Caulobacterales	Caulobacteraceae	Terricaulis	Terricaulis silvestris		Terricaulis silvestris						Fall/Winter	Fall/Winter	0.745492	9.94e-26			Fall/Winter	Fall/Winter	0.839761	3.83113e-58
CGTAGTTCGGAATTACTGGGCTTAAAGAGTTCGTAGGTGGTTGAAAAAGTTGGTGGTGAAATCCCAGAGCTTAACTCTGGAACTGCCATCAAAACTTTTCAGCTAGAGTTTGATAGAGGAAAGCAGAATTTCTAGTGTAGAGGTGAAATTCGTAGATATTAGAAAGAATACCAATTGCGAAGGCAGCTTTCTGGATCATTACTGACACTGAGGAACGAAAGCA	Fall/Winter	0.830819	1.66492e-62		Proteobacteria_5216			Bacteria	Proteobacteria		Alphaproteobacteria	Pelagibacterales	Pelagibacteraceae	Candidatus Pelagibacter	Candidatus Pelagibacter ubique	Candidatus Pelagibacter ubique HTCC1062	Candidatus Pelagibacter ubique HTCC1062						Fall/Winter	Fall/Winter	0.862743	4.17e-42			Fall/Winter	Fall/Winter	0.785546	4.4777e-46
TGTTATCCGGAATTATTGGGCGTAAAGCGTCTGTAGGTTGCCTAACAAGTCTGTTGTTAAAGGTTAAAGCTTAACTTTAAAACTGCAGCAGAAACTGCTAGGCTTGAGTACAGTCGAAGTAGAGGGAATTTCCAGTGAAGCGGTGAAATGCGTAGATATTGGAAGGAACACCAATGGCGAAAGCACTCTACTAGACTTTTACTGACACTCAGAGACGAAAGCT	Fall/Winter	0.830233	2.4208e-62		Cyanobacteria_140			Bacteria	Cyanobacteria	Cyanobacteria/Melainabacteria group		Synechococcales	Synechococcaceae	Synechococcus	Synechococcus sp. PCC 8807		Synechococcus sp. PCC 8807						Fall/Winter	Fall/Winter	0.760853	2.57e-27			Fall/Winter	Fall/Winter	0.812333	1.51322e-51
CGTTAATCGGAATTACTGGGCGTAAAGCGCGCGTAGGTGGTTTTTTAAGTTGGATGTGAAAGCCCTGGGCTCAACCTAGGAACTGCATCCAAAACTAGATGACTAGAGTACGAAAGAGGGAAGTAGAATTCACAGTGTAGCGGTGGAATGCGTAGATATTGTGAAGAATACCAATGGCGAAGGCAGCTTCCTGGTTCTGTACTGACACTAAGGTGCGAAAGCG	Fall/Winter	0.816662	9.56906e-59		Proteobacteria_1889			Bacteria	Proteobacteria		Gammaproteobacteria	Pseudomonadales	Moraxellaceae	Moraxella	Moraxella cuniculi		Moraxella cuniculi						Fall/Winter	Fall/Winter	0.745388	1.02e-25			Fall/Winter	Fall/Winter	0.810451	3.91138e-51
CGTTGTCCGGAATCATTGGGCGTAAAGGGTCCGTAGGCGGTTTAACAAGTCAATTGTTAAAGACATCGGCTTAACCGATGGAGTGCAGTTGAAACTGTTAGAATAGAGTTTAGGAGAGGAAAGTGGAATTTCTGGTGTAGCGGTGACATGCGTAGATATCAGAAGGAACACCAATGGCGAAGGCAACTTTCTGGCCTAAAACTGACGCTGAGGGACGAAAGCG	Fall/Winter	0.816562	1.01487e-58		Firmicutes_Tenericutes_3743			Bacteria	Firmicutes	Terrabacteria group	Tissierellia	Tissierellales	Gottschalkiaceae	Gottschalkia	Gottschalkia acidurici	Gottschalkia acidurici 9a	Gottschalkia acidurici 9a						Fall/Winter	Fall/Winter	0.762019	1.92e-27			Fall/Winter	Fall/Winter	0.820471	2.19315e-53
CGTTAATCGGAATTACTGGGCGTAAAGCGCGCGTAGGCGGTTTAGCAAGTTGTATGTGAAAGCCCTGGGCTCAACCTAGGAACTGCATCCAAAACTACTAAGCTAGAGTACGAGAGAGGAGAGTAGAATTTCTGGTGTAGCGGTGAAATGCGTAGATATCAGAAGGAATACCAATGGCGAAGGCAGCTCTCTGGCTCGTCACTGACGCTGAGGTGCGAAAGCG	Fall/Winter	0.81426	3.8582e-58		Proteobacteria_1584			Bacteria	Proteobacteria		Gammaproteobacteria	Cellvibrionales	Spongiibacteraceae				Spongiibacteraceae						Fall/Winter	Fall/Winter	0.798702	8.48e-32			Fall/Winter	Fall/Winter	0.776982	1.72559e-44
TGGTCGTCGCTTTTATTGGGCCTAAAACGTCCGTAGCCTGTTTGGTAAATCTGTGGGTAAATCAACGAGCTCAACTCGTTGAATTCTGCAGAGACTGCCAGACTAGGGACCGGGAGAGGTATGAGGTACTCTGGGGGTAGGGGTAAAATCCTGTCATCCTCAGAGGACCACCTGTTGCGAAGGCGTCATACTGGAACGGATCCGACGGTCAGGGACGAAGCCT	Fall/Winter	0.794029	2.29561e-53		archaea_2			Archaea	Euryarchaeota	Diaforarchaea group	Thermoplasmata	Methanomassiliicoccales					Methanomassiliicoccales						Fall/Winter	Fall/Winter	0.814066	6.71e-34			Fall/Winter	Fall/Winter	0.802319	2.10516e-49
CGTAGTTCGGAATTACTGGGCTTAAAGAGTTCGTAGGTGGTTGAAAAAGTTGGTGGTGAAATCCCAGAGCTTAACTCTGGAACTGCCATCAAAACTTTTCAGCTAGAGTATGATAGAGGAAAGCAGAATTTCTAGTGTAGAGGTGAAATTCGTAGATATTAGAAAGAATACCAATTGCGAAGGCAGCTTTCTGGATCATTACTGACACTGAGGAACGAAAGCA	Fall/Winter	0.776583	1.16751e-49		Proteobacteria_5215			Bacteria	Proteobacteria		Alphaproteobacteria	Pelagibacterales	Pelagibacteraceae	Candidatus Pelagibacter	Candidatus Pelagibacter sp. FZCC0015		Candidatus Pelagibacter sp. FZCC0015						Fall/Winter	Fall/Winter	0.819241	1.19e-34			Fall/Winter	Fall/Winter	0.72213	8.87114e-36
CGTTGTCCGGAATAACTGGGCGTAAAGGGTCCGTAGGCGTTTTATTAAGTTGATTGTTAAATCCACCGGCTTAACCGGTGATCTGCAATCAAAACTGATAAAATAGAATATGTGAGAGGAATGTGGAATTCCTGGTGTAGCGGTGACATGCGTAGATATCAGGAGGAACACCAATGGCGAAGGCAGCATTCTGGCACAATATTGACGCTGAGGGACGAAAGCG	Fall/Winter	0.768744	4.22091e-48		Spirochaetes_148			Bacteria	Spirochaetes		Spirochaetia						Spirochaetia						Fall/Winter	Fall/Winter	0.81698	2.55e-34			Fall/Winter	Fall/Winter	0.782738	1.50966e-45
CGTAGTTCGGAATTACTGGGCTTAAAGAGCTCGTAGGTGGTTAAAAAAGTTGATGGTGAAATCCCAAGGCTTAACCTTGGAACTGCCATCAAAACTTTTTAGCTAGAGTGTGATAGAGGTAAGTGGAATTTCTAGTGTAGAGGTGAAATTCGTAGATATTAGAAAGAACACCAAATGCGAAGGCAACTTACTGGGTCACTACTGACACTGAGGAGCGAAAGCA	Fall/Winter	0.764639	2.61153e-47		Proteobacteria_5215			Bacteria	Proteobacteria		Alphaproteobacteria	Pelagibacterales	Pelagibacteraceae	Candidatus Pelagibacter	Candidatus Pelagibacter sp. FZCC0015		Candidatus Pelagibacter sp. FZCC0015						Fall/Winter	Fall/Winter	0.799503	6.66e-32			Fall/Winter	Fall/Winter	0.753025	2.10209e-40
CGTTACTCGGAATTACTGGGCGTAAAGCGAGCGTAGGCGGTTAATCAAGTTGGGGGTGAAAGCCCGGGGCTCAACCCCGGAAATGCCCTCAAAACTAGTTAACTAGAGGACGGGAGAGGGGAGTGGAACTCCCAGTGTAGAGGTGAAATTCGTAGATATTGGGAAGAACACCAGTGGCGAAGGCGACTCTCTGGACCGTTTCTGACGCTAAGGCTCGAAAGCG	Fall/Winter	0.762868	5.66774e-47		Proteobacteria_5269			Bacteria	Proteobacteria		Alphaproteobacteria	Rhodospirillales	Rhodospirillaceae	Ferrovibrio	Ferrovibrio terrae		Ferrovibrio terrae						Fall/Winter	Fall/Winter	0.712437	1.14e-22			Fall/Winter	Fall/Winter	0.742883	8.20308e-39
TGGTAGCCACTATTATTGGGCCTAAAGCGTTCGTAGCCGGTTTAGTAAATTCTTGGGTAAATCGTACAGCTTAACTGTGCGGATTCCGGGGACACTACTAGACTTGAGACCGGGAGAGATTAGAGGTACTTGCAGGGGAGCGGTGAAATGTTGTAATCCTGCAGGGACCACCAGTGGCGAAGGCGTCTAATCATAACGGCTCTGACGGTGAGGAACGAAACCC	Fall/Winter	0.762105	7.89922e-47		archaea_4			Archaea	Euryarchaeota	Diaforarchaea group	Thermoplasmata	Methanomassiliicoccales					Methanomassiliicoccales						Fall/Winter	Fall/Winter	0.783871	6.19e-30			Fall/Winter	Fall/Winter	0.758816	2.39265e-41
CGTTATCCGGATTTATTGGGTTTAAAGGGTCCGTAGGCGGGTTATTAAGTCAGTGGTGAAATCCTACAGCTCAACTGTAGAACTGCCATTGAAACTGGTAACCTTGAGTATAATTGAAGTGGGCGGAATGTGTCATGTAGCGGTGAAATGCTTAGATATGACACAGAACACCGATTGCGAAGGCAGCTCACTAAGTTATAACTGACGCTGAGGGACGAAAGCG	Fall/Winter	0.757975	4.65655e-46		Bacteroidetes_518			Bacteria	Bacteroidetes	FCB group	Flavobacteriia	Flavobacteriales	Schleiferiaceae	Owenweeksia	Owenweeksia hongkongensis	Owenweeksia hongkongensis DSM 17368	Owenweeksia hongkongensis DSM 17368						Fall/Winter	Fall/Winter	0.707997	2.73e-22			Fall/Winter	Fall/Winter	0.755779	7.53607e-41
TGTTGTCCGGAATCATTGGGCGTAAAGGGTCCGTAGGTGGCTTGAAAAGTCTTATGTGAAATCTCTTGGCTCAACCAAGAAACGCCATAAGAAACTTTCATGCTAGAGATCATCAGAGGGAGGTAGAATTTCAGGTGTAGTGGTGAAATGCGTAGATATCTGAAGGAATACCAATGGCGAAAGCAGCCTCCTGGGGTGAATCTGACATTGAGGGACGAAAGCG	Fall/Winter	0.757463	5.78914e-46		phylum_reps_2497																		Fall/Winter	Fall/Winter	0.776233	4.95e-29			Fall/Winter	Fall/Winter	0.74416	5.22197e-39
CGTTATTCGGAATAACTGGGCGTAAAGGGCGCGTAGGCGGTCTATCCAGTTGGGCGTGAAAGCCCTGGGCTCAACCCAGGAATTGCGTTCAATACTAATAGACTAGAGACCGAGAGAGGATAGTGGAATTTCCAGTGTAGAGGTGAAATTCGTAGATATTGGAAAGAACACCAGTGGCGAAAGCGGCTATCTGGCTCGGAACTGACGCTGAGGCGCGAAAGCG	Fall/Winter	0.755905	1.11803e-45		Proteobacteria_5226			Bacteria	Proteobacteria		Alphaproteobacteria	Rhodospirillales	Rhodospirillaceae	Hypericibacter			Hypericibacter						Fall/Winter	Fall/Winter	0.713743	8.82e-23			Fall/Winter	Fall/Winter	0.722467	7.95946e-36
CGTTATCTGGAATAATTGGGCGTAAAGGGTTCGTAGGCTGTATTTTGCTGTTGAATGTTAAAAATCAGAGCTTAACTTTGAAAATGCATTCAAAACGTTTATACTTGAGTACGAAATAGGACAATGGAATTTTACAAGGAGGGGTGAAATCCGTAGAACTGTAAAGGAATGTCAAAAGCGAAGGCAGTTGTCTGGGTCGTTACTGACGCTAAGGAACGAAAGCG	Fall/Winter	0.741862	3.40746e-43		phylum_reps_2497																		Fall/Winter	Fall/Winter	0.706382	3.74e-22			Fall/Winter	Fall/Winter	0.729706	7.46527e-37
CGTTAATCGGAATTACTGGGCGTAAAGCGCGCGTAGGCGGTTTAGTAAGTCGGATGTGAAAGCCCAGGGCTTAACCCTGGAATTGCATTCGATACTGCTTGACTAGAGTATGGTAGAGGGAAGTGGAATTTCAAGTGTAGCGGTGAAATGCGTAGATATTTGAAGGAACACCAGTGGCGAAGGCGACTTCCTGGGCCAATACTGACGCTGAGGTGCGAAAGCG	Fall/Winter	0.740873	5.02684e-43		Proteobacteria_4237			Bacteria	Proteobacteria		Gammaproteobacteria	Chromatiales	Woeseiaceae	Woeseia	Woeseia oceani		Woeseia oceani						Fall/Winter	Fall/Winter	0.75024	3.3e-26			Fall/Winter	Fall/Winter	0.731304	4.38268e-37
CGTTATCCGGAATTATTGGGTTTAAAGGGTCCGCAGGCGGTTTGTTAAGTCAGAGGTGAAATCCTACCGCTCAACGGTAGAATTGCCTTTGATACTGATAGACTTGAGTTATTGTGAAGTAGTTAGAATGTGTAGTGTAGCGGTGAAATGCATAGATATTACACAGAATACCAATTGCGAAGGCAGATTACTAACAATACACTGACGCTGAGGGACGAAAGCG	Fall/Winter	0.737438	1.91287e-42		Bacteroidetes_997			Bacteria	Bacteroidetes	FCB group	Flavobacteriia	Flavobacteriales	Flavobacteriaceae	Flavivirga	Flavivirga eckloniae		Flavivirga eckloniae						Fall/Winter	Fall/Winter	0.754073	1.33e-26			Fall/Winter	Fall/Winter	0.740815	1.69576e-38
CGTTGTTCGGAATTACTGGGCGTAAAGCGCATGTAGGCGGAACAGAAAGTTAGAAGTGAAATCCCTGGGCTCAACCTAGGAATTGCTTTTAAAACTTCTGTTCTGGAATTCAGGAGAGGAAAATGGAATTTCCAGTGTAGAGGTGAAATTCGTAGATATTGGAAGGAACACCAGTGGCGAAGGCGATTTTCTGGACTGATATTGACGCTGAGATGCGAAGGCA	Fall/Winter	0.73412	6.82146e-42		Proteobacteria_6102			Bacteria	Proteobacteria		Alphaproteobacteria	Caulobacterales	Caulobacteraceae	Terricaulis	Terricaulis silvestris		Terricaulis silvestris						Fall/Winter	Fall/Winter	0.64139	2.35e-17			Fall/Winter	NA	NA	NA
CGTTATCCGGAATCATTGGGTTTAAAGGGTCCGTAGGTGGACAAATAAGTCAGAGGTGAAATCCTGCAGCTCAACTGTAGAACTGCCTTTGATACTGTTTGTCTTGAGTTATTATGAAGTGGTTAGAATGTGTAGTGTAGCGGTGAAATGCATAGATATTACACAGAATACCGATTGCGAAGGCAGATCACTAATAATTAACTGACACTGAGGGACGAAAGCG	Fall/Winter	0.733362	9.09649e-42		Bacteroidetes_1028			Bacteria	Bacteroidetes	FCB group	Flavobacteriia	Flavobacteriales	Flavobacteriaceae				Flavobacteriaceae						Fall/Winter	Fall/Winter	0.803049	2.25e-32			Fall/Winter	Fall/Winter	0.723244	6.19649e-36
CGTTATCCGGATTTATTAGGTTTAAAGGGTCCGCAGGCGGAATATTAAGTCAGTGGTGAAAGCCTACAGCTCAACTGTAGAACTGCCATTGAAACTGTTATTCTTGAGTATGGATGAAGTGGGCGGAATATGTCATGTAGCGGTGAAATGCATAGATATGACATGGAACACCAATTGCGAAGGCAGCTCACTAAACCATTACTGACGCTCATGGACGAAAGCG	Fall/Winter	0.723712	3.26143e-40		Bacteroidetes_518			Bacteria	Bacteroidetes	FCB group	Flavobacteriia	Flavobacteriales	Schleiferiaceae	Owenweeksia	Owenweeksia hongkongensis	Owenweeksia hongkongensis DSM 17368	Owenweeksia hongkongensis DSM 17368						Fall/Winter	Fall/Winter	0.592939	1.83e-14			Fall/Winter	Fall/Winter	0.691238	9.68822e-32
TGTTATTCGAATTAATTGGGCGTAAAGGGCATGTAGGTGGAGAGATGTAGTTGTTTGTGAAAGTCCAAAGGGTTTCTTTGGGTGTGCATTCAAGACGGTTTCTTCTCTTTGAGGGTGTAAGAGGAAAATAGAATTTCCAGAGGAGAGGTTAAATTCTTAGATTTTGGAAGGAATACCTAATGCGAAGGCAATTTTCTGGTGCACTCCTGACACTGAGGTGCGAAAGCG	Fall/Winter	0.721601	6.99216e-40		Proteobacteria_6887			Bacteria	Proteobacteria		Gammaproteobacteria	Oceanospirillales	Halomonadaceae	Candidatus Carsonella	Candidatus Carsonella ruddii		Candidatus Carsonella ruddii						Fall/Winter	Fall/Winter	0.799502	6.66e-32			Fall/Winter	Fall/Winter	0.689618	1.52765e-31
CGTTAATCGGAATTACTGGGCGTAAAGCGCGCGTAGGTGGTTTGTTAAGTTGGATGTGAAAGCCCTGGGCTCAACCTAGGAACTGCATCCAAAACTAACTCACTAGAGTACGATAGAGGGAGGTAGAATTCATAGTGTAGCGGTGGAATGCGTAGATATTATGAAGAATACCAGTGGCGAAGGCGGCCTCCTGGATCTGTACTGACACTAAGGTGCGAAAGCG	Fall/Winter	0.71332	1.30386e-38		Proteobacteria_2597			Bacteria	Proteobacteria		Gammaproteobacteria	Pseudomonadales	Pseudomonadaceae				Pseudomonadaceae						Fall/Winter	Fall/Winter	0.733522	1.44e-24			Fall/Winter	Fall/Winter	0.690054	1.35179e-31
CGTTAATCGGAATTACTGGGCGTAAAGCGCGCGTAGGTGGTTTGTTAAGTTGGATGTGAAAGCCCTGGGCTCAACCTAGGAACTGCATCCAAAACTGACTGACTAGAGTACGATAGAGGGAGGTAGAATTCATAGTGTAGCGGTGGAATGCGTAGATATTATGAAGAATACCAGTGGCGAAGGCGGCCTCCTGGATCTGTACTGACACTGAGGTGCGAAAGCG	Fall/Winter	0.706523	1.33334e-37		Proteobacteria_2597			Bacteria	Proteobacteria		Gammaproteobacteria	Pseudomonadales	Pseudomonadaceae				Pseudomonadaceae						Fall/Winter	Fall/Winter	0.745624	9.65e-26			Fall/Winter	Fall/Winter	0.693527	5.0648e-32
TGGTAGTCGCTTTTATTGGGCCTAAAACGTCCGTAGCCGGTCTGATACATTCGTGGGTAAATCAACCAGCTCAACTGGTTGAATTCTGCGAGGACGGTCAGACTTGGGACCGGGAGAGGTGTGGGGTACGCTCAGGGTAGGGGTAAAATCCTGTCATCCTGAGCGGACCACCTGTTGCGAAGGCGCCACACTAGAACGGATCCGACGGTCAGGGACGAAGCCT	Fall/Winter	0.698853	1.69879e-36		archaea_4			Archaea	Euryarchaeota	Diaforarchaea group	Thermoplasmata	Methanomassiliicoccales					Methanomassiliicoccales						Fall/Winter	Fall/Winter	0.489215	1.14e-09			Fall/Winter	Fall/Winter	0.636254	1.10778e-25
CGTTGTCCGGATTTATTGGGCGTAAAGAGCTCGTAGGCGGTTCAACAAGTCGGTAGTAAAAGTTCAGGGCTCAACCCTGAAATGTCTATCGATACTGTTGTGACTAGGATACGGCAGAGGTGAGTGGAATTCCGAGTGTAGCGGTGAAATGCGTAGATATTCGGAGGAACACCAATTGCGAAGGCAGCTCACTGGGCCGCTATCGACGCTGAGGAGCGAAAGCT	Fall/Winter	0.698208	2.09614e-36		Actinobacteria_177			Bacteria	Actinobacteria	Terrabacteria group	Acidimicrobiia	Acidimicrobiales					Acidimicrobiales						Fall/Winter	Fall/Winter	0.737407	6.15e-25			Fall/Winter	Fall/Winter	0.663545	1.57679e-28
CGTTGTTCGGAATTACTGGGCGTAAAGGGCGTGCAGGCGGATTGGCAAGCCGGAGGTGAAAGCCCGGGGCTCAACCCCGGAGGGTCTTTCGGAACTGCCAGTCTTGAGAGGGTCAGGGGCCAGCGGAATTCCTGGTGTAGAGGTGAAATTCGTAGAGATCAGGAGGAACACCGGCGGCGAAAGCGGCTGGCTGGGGCCACTCTGACGCTGAGGCGCGAAAGCG	Fall/Winter	0.693586	9.30885e-36		Proteobacteria_4265			Bacteria	Proteobacteria		Deltaproteobacteria	Syntrophobacterales	Syntrophaceae	Desulfobacca	Desulfobacca acetoxidans	Desulfobacca acetoxidans DSM 11109	Desulfobacca acetoxidans DSM 11109						Fall/Winter	Fall/Winter	0.731905	2.04e-24			Fall/Winter	Fall/Winter	0.669671	3.28955e-29
TGTTATTCGGAATAATTGGGCGTAAATGGCGTGTAGGTTGTGTTTCGTAGCTTTTTGTTAAATCCCCATTGTTAAAATGGGTCACGCGAAAAGAACGGTTACACTGGAGACTGAGAGAGGAAAGGGGAATTTCTAGTGGAGAAGTTAAATTCTTAGATATTAGAAGGAACACCAAAAGCGAAAGCACCTTTCTGGCTCAGATCTGACACTGAGGCGCGAAGGCG	Fall/Winter	0.692732	1.22263e-35		Proteobacteria_6887			Bacteria	Proteobacteria		Gammaproteobacteria	Oceanospirillales	Halomonadaceae	Candidatus Carsonella	Candidatus Carsonella ruddii		Candidatus Carsonella ruddii						Fall/Winter	Fall/Winter	0.685585	1.75e-20			Fall/Winter	Fall/Winter	0.659071	4.83976e-28
CGTTATCCGGAATCATTGGGTTTAAAGGGTCCGCAGGCGGTTTTTTAAGTCAGAGGTGAAATCCTACAGCTCAACTGTAGAATTGCCTTTGAAACTGAAAGACTTGAGTTATTGTGAAGTGGTTAGAATGTGTGGTGTAGCGGTGAAATGCATAGATATCACACAGAATACCAATTGCGAAGGCAGATCACTAACAATTAACTGACGCTCAGGGACGAAAGCG	Fall/Winter	0.69061	2.39578e-35		Bacteroidetes_975			Bacteria	Bacteroidetes	FCB group	Flavobacteriia	Flavobacteriales	Flavobacteriaceae	Kordia			Kordia						Fall/Winter	Fall/Winter	0.677428	7.28e-20			Fall/Winter	Fall/Winter	0.715419	7.42841e-35
TGGTCAGGATGATTATTGGGCCTAAAGCATCCGTAGCCGGCTCTGTAAGTTTTCGGTTAAATCTGTACGCTCAACGTACAGGCTGCCGGGAATACTGCAGAGCTAGGGAGTGGGAGAGGTAGACGGTACTCGGTAGGAAGGGGTAAAATCCTTTGATCTATTGATGACCACCTGTGGCGAAGGCGGTCTACCAGAACACGTCCGACGGTGAGGGATGAAAGCT	Fall/Winter	0.678909	8.83548e-34		archaea_179			Archaea	Thaumarchaeota	TACK group		Nitrosopumilales	Nitrosopumilaceae	Nitrosopumilus	Nitrosopumilus maritimus	Nitrosopumilus maritimus SCM1	Nitrosopumilus maritimus SCM1						Fall/Winter	Fall/Winter	0.50054	4.06e-10			Fall/Winter	Fall/Winter	0.682966	9.61219e-31
CGTTAATCGGAATTACTGGGCGTAAAGCGCGCGTAGGTGGTTTTTTAAGTTGGATGTGAAAGCCCTGGGCTCAACCTAGGAACTGCATCCAAAACTGAATAACTAGAGTACGATAGAGGGAGGTAGAATTCATAGTGTAGCGGTGGAATGCGTAGATATTATGAAGAATACCAGTGGCGAAGGCGGCCTCCTGGATCTGTACTGACACTAAGGTGCGAAAGCG	Fall/Winter	0.677027	1.55403e-33		Proteobacteria_2589			Bacteria	Proteobacteria		Gammaproteobacteria	Pseudomonadales	Pseudomonadaceae				Pseudomonadaceae						Fall/Winter	Fall/Winter	0.703772	6.17e-22			Fall/Winter	Fall/Winter	0.68594	4.2499e-31
CGTTATCCGGAATTATTGGGCGTAAAGCGTCCGCAGGCGGCCTTTCAAGTCTGCTGTTAAAGCGTGGAGCTTAACTCCATTATGGCAGTGGAAACTGATCGGCTTGAGTATGGTAGGGGCAGAGGGAATTCCCGGTGTAGCGGTGAAATGCGTAGATATCGGGAAGAACACCAGTGGCGAAGGCGCTCTGCTGGGCCATTACTGACGCTCATGGACGAAAGCC	Fall/Winter	0.676693	1.71747e-33		Cyanobacteria_241			Bacteria	Cyanobacteria	Cyanobacteria/Melainabacteria group		Synechococcales	Prochloraceae	Prochlorococcus	Prochlorococcus marinus	Prochlorococcus marinus subsp. pastoris str. CCMP1986	Prochlorococcus marinus subsp. pastoris str. CCMP1986						Fall/Winter	Fall/Winter	0.756277	7.85e-27			Fall/Winter	Fall/Winter	0.633032	2.30086e-25
CGTTGTTCGGATTTACTGGGCGTAAAGGGTGCGTAGGTGGCCAGGAAAGTTTGATGTGAAAGCTCCGAGCTCAACTCGGAAAATGCATTGAATACTACTTGGCTTGAGGATCGGAGGGGAGACTGGAATTCTCGGTGTAGCAGTGAAATGCGTAGATATCGAGAGGAACACCAGTGGCGAAGGCGAGTCTCTGGACGATTCCTGACACTGAGGCACGAAAGCT	Fall/Winter	0.670784	9.82222e-33		Verrucomicrobia_12			Bacteria	Verrucomicrobia	PVC group							PVC group						Fall/Winter	Fall/Winter	0.648448	8.07e-18			Fall/Winter	Fall/Winter	0.674274	9.88452e-30
CGTTATCCGGAATCATTGGGTTTAAAGGGTCCGTAGGCGGTCTGGTAAGTCAGAGGTGAAATCCTGCAGCTCAACTGTAGCATTGCCTTTGATACTGCCAGACTTGAGTTATTGTGAAGTAGTTAGAATGTGTAGTGTAGCGGTGAAATGCATAGATATTACACAGAATACCGATTGCGAAAGCAGATTACTAACAATATACTGACGCTGAGGGACGAAAGCG	Fall/Winter	0.656189	6.16455e-31		Bacteroidetes_1111			Bacteria	Bacteroidetes	FCB group	Flavobacteriia	Flavobacteriales	Flavobacteriaceae				Flavobacteriaceae						Fall/Winter	Fall/Winter	0.698174	1.78e-21			Fall/Winter	Fall/Winter	0.664759	1.15915e-28
CGTTAATCGGAATTACTGGGCGTAAAGCGCGCGTAGGCGGTTTGTTAAGTGAGATGTGAAAGCCCAGGGCTCAACCTTGGAACTGCATCTCATACTGGCAGGCTAGAGTACGGTAGAGGGGGGTAGAATTCCATGTGTAGCGGTGAAATGCGTAGAGATGTGGAGGAATACCAGTGGCGAAGGCGGCCCCCTGGATCGATACTGACGCTAAGGTGCGAAAGCG	Fall/Winter	0.65025	3.11333e-30		Proteobacteria_6782			Bacteria	Proteobacteria		Gammaproteobacteria			Pseudohongiella	Pseudohongiella spirulinae		Pseudohongiella spirulinae						Fall/Winter	Fall/Winter	0.541882	6.72e-12			Fall/Winter	Fall/Winter	0.634794	1.54439e-25
CGTTGTTCGGAATTACTGGGCGTAAAGCGTGCGTAGGCGGAATGGTAAGTCAGATGTGAAATCCCGGGGCTCAACCTCGGAACTGCATCCGATACTGCCAATCTAGAGTAGTGGAGGGGAGTCTGGAATTCACGGTGTAGCAGTGAAATGCGTAGATATCGTGAGGAACACTAGTGGCGAAGGCGAGACTCTGGACACTAACTGACGCTGAGGCACGAAGGCT	Fall/Winter	0.645463	1.11891e-29		Verrucomicrobia_27			Bacteria	Verrucomicrobia	PVC group	Verrucomicrobiae	Verrucomicrobiales					Verrucomicrobiales						Fall/Winter	Fall/Winter	0.594856	1.44e-14			Fall/Winter	Fall/Winter	0.672049	1.77251e-29
CGTTAATCGGAATTACTGGGCGTAAAGCGCGCGTAGGCTGTTATCTAAGTCGAATGTGAAATCCTCGGGCTCAACCTGGGAACTGCATCCGAAACTGGATAACTAGAGTATGGGAGAGGTAAGTAGAATTTCCGGTGTAGCGGTGAAATGCGTAGATATCGGAAGGAATACCAGTGGCGAAGGCGGCTTACTGGACCAATACTGACGCTAAGGTGCGAAAGCG	Fall/Winter	0.641836	2.90519e-29		Proteobacteria_6627			Bacteria	Proteobacteria		Gammaproteobacteria						Gammaproteobacteria						Fall/Winter	Fall/Winter	0.66241	8.91e-19			Fall/Winter	Fall/Winter	0.664257	1.31684e-28
CGTTATCCGGAATTATTGGGCGTAAAGCGTCCGCAGGCGGCCTTTCAAGTCTGCTGTTAAAGCGTGGAGCTTAACTCCATCATGGCAGTGGAAACTGATCGGCTTGAGTATGGTAGGGGCAGAGGGAATTCCCGGTGTAGCGGTGAAATGCGTAGATATCGGGAAGAACACCAGTGGCGAAGGCGCTCTGCTGGGCCATTACTGACGCTCATGGACGAAAGCC	Fall/Winter	0.641039	3.57699e-29		Cyanobacteria_240			Bacteria	Cyanobacteria	Cyanobacteria/Melainabacteria group		Synechococcales	Prochloraceae	Prochlorococcus	Prochlorococcus marinus	Prochlorococcus marinus str. MIT 9515	Prochlorococcus marinus str. MIT 9515						Fall/Winter	Fall/Winter	0.592964	1.82e-14			Fall/Winter	Fall/Winter	0.626262	1.03929e-24
CGTTATCCGGAATCATTGGGTTTAAAGGGTCCGCAGGCGGTCTATTAAGTCAGAGGTGAAATCCTGCCGCTCAACGGTAGAATGGCCTTTGATACTGATAGACTTGAGTTATTGTGAAGTAGTTAGAATGTGTAGTGTAGCGGTGAAATGCATAGATATTACACAGAATACCAATTGCGAAGGCAGATTACTAACAATACACTGACGCTGAGGGACGAAAGCG	Fall/Winter	0.639661	5.11777e-29		Bacteroidetes_997			Bacteria	Bacteroidetes	FCB group	Flavobacteriia	Flavobacteriales	Flavobacteriaceae	Flavivirga	Flavivirga eckloniae		Flavivirga eckloniae						Fall/Winter	Fall/Winter	0.728554	4.19e-24			Fall/Winter	Fall/Winter	0.643302	2.17216e-26
TGTTATCCGGAATCACTGGGCGTAAAGCGTCTGTAGGTGGCTTAACAAGTCAACTGTTAAATCTTGAAGCTCAACTTCGAAATCGCAGTCGAAACTGTTAGGCTAGAGTATAGTAGGGGTAAAGGGAATTTCCAGTGGAGCGGTGAAATGCGTAGAGATTGGAAAGAACACCGATGGCGAAGGCACTTTACTGGGCTATTACTGACACTCAGAGACGAAAGCT	Fall/Winter	0.638195	7.47603e-29		Cyanobacteria_154			Bacteria	Cyanobacteria	Cyanobacteria/Melainabacteria group		Chroococcales					Chroococcales						Fall/Winter	Winter/Spring	0.482388	2.08e-09			Fall/Winter	Fall/Winter	0.641502	3.30689e-26
CGTTAATCGGAATTACTGGGCGTAAAGAGTACGTAGGCGGCTTTTCAAGTCGGGTGTGAAATCCCTGAGCTTAACTCAGGAACTGCATTCGATACTGGATCGCTAGAGTATATTAGAGGATAGTGGAATTTCAAGTGTAGCGGTGAAATGCGTAGATATTTGAAGGAACACCAATGGCGAAGGCAGCTATCTGGAATAATACTGACGCTGAGGTACGAAAGCG	Fall/Winter	0.626207	1.53722e-27		Proteobacteria_3958			Bacteria	Proteobacteria		Gammaproteobacteria	Thiotrichales	Thiotrichaceae	Beggiatoa	Beggiatoa leptomitoformis		Beggiatoa leptomitoformis						Fall/Winter	Fall/Winter	0.645547	1.26e-17			Fall/Winter	Fall/Winter	0.625263	1.29421e-24
CGTTGTTCGGAATTACTGGGCGTAAAGAGCGTGTAGGCTGTTAGGTAAGTCAGAGGTGAAATCCCTAAGCTCAACTTAGGAACTGCCTTTGATACTATCTTACTAGAGATCGAGAGAAGTTAGCGGAATTCCAAGTGTAGAGGTGAAATTCGTAGATATTTGGAAGAACACCAGTGGCGAAAGCGGCTAACTGGCTCGTATCTGACGCTGAGACGCGAAAGCG	Fall/Winter	0.626176	1.54904e-27		Proteobacteria_6565			Bacteria	Proteobacteria		Alphaproteobacteria	Rhodospirillales	Rhodospirillaceae	Candidatus Endolissoclinum	Candidatus Endolissoclinum faulkneri		Candidatus Endolissoclinum faulkneri						Fall/Winter	Late-Summer	0.575189	1.6e-13			Fall/Winter	Fall/Winter	0.59237	1.16653e-21
CGTTAATCGGAATTACTGGGCGTAAAGCGCGCGTAGGTGGTTTGTTAAGTGGGATGTGAAAGCCCCGGGCTTAACCTGGGAACTGCATTCCAAACTGACAAACTAGAGTACGATAGAGGGGGGTAGAATTCAGAGTGTAGCGGTGAAATGCGTAGATATTCTGAGGAATACCGGTGGCGAAGGCGGCCCCCTGGATTGATACTGACACTGAGGTGCGAAAGCG	Fall/Winter	0.624222	2.50439e-27		Proteobacteria_1587			Bacteria	Proteobacteria		Gammaproteobacteria	Cellvibrionales	Halieaceae	Halioglobus			Halioglobus						Fall/Winter	Fall/Winter	0.620652	4.68e-16			Fall/Winter	Fall/Winter	0.624555	1.51117e-24
CGTTGTTCGGAATCACTGGGCGTAAAGGGAGCGTAGGCGGCGTGGTAAGTCAGATGTGAAATTCCGGGGCTCAACCTCGGAACTGCATCCGATACTGCCATGCTAGAGTGGTGGAGGGGCATCTGGAATTCACGGTGTAGCAGTGAAATGCGTAGATATCGTGAGGAACACTAGTGGCGAAGGCGAGATGCTGGACACCTACTGACGCTGAGGCTCGAAGGCC	Fall/Winter	0.623052	3.33355e-27		Verrucomicrobia_24			Bacteria	Verrucomicrobia	PVC group	Verrucomicrobiae	Verrucomicrobiales	Verrucomicrobiaceae	Luteolibacter	Luteolibacter luteus		Luteolibacter luteus						Fall/Winter	Fall/Winter	0.574128	1.82e-13			Fall/Winter	Fall/Winter	0.637131	9.06602e-26
CGTTGTTCGGAATTACTGGGCGTAAAGCGCACGTAGGCGGATTAATAAGTCAGGGGTGAAATCCCGAGGCTCAACCTCGGAACTGCCTTTGATACTGTTAGTCTTGAGTTCGAGAGAGGTGAGTGGAATTCCGAGTGTAGAGGTGAAATTCGTAGATATTCGGAGGAACACCAGTGGCGAAGGCGGCTCACTGGCTCGATACTGACGCTGAGGTGCGAAAGCG	Fall/Winter	0.619589	7.71865e-27		Proteobacteria_5917			Bacteria	Proteobacteria		Alphaproteobacteria	Rhodobacterales	Rhodobacteraceae	Thioclava	Thioclava nitratireducens		Thioclava nitratireducens						Fall/Winter	Fall/Winter	0.750477	3.12e-26			Fall/Winter	Fall/Winter	0.584167	5.65193e-21
CGTTGTTCGGAATTATTGGGCGTAAAGGGCGCGCAGGCGGTTTGGATAGTTAGACGTGAAAGCCCTGGGCTTAACCTAGGAACTGCGTTTAATACTGCCAAACTAGAGAACTAGAGAGGATAGCGGAACTCCCAGTGTAGAGGTGAAATTCGTAGATATTGGGAAGAACATCAGTGGCGAAAGCGGCTGTCTGGCTAGTTTCTGACGCTGAGGCGCGAAAGCG	Fall/Winter	0.613876	3.01441e-26		Proteobacteria_5223			Bacteria	Proteobacteria		Alphaproteobacteria						Alphaproteobacteria						Fall/Winter	Fall/Winter	0.562866	6.7e-13			Fall/Winter	Fall/Winter	0.596563	5.11616e-22
CGTTAATCGGAATTACTGGGCGTAAAGGGCGCGTAGGCGGCTTAGTCAGTCGGATGTGAAAGCCCCGGGCTTAACCTGGGAACTGCATTCGATACTGCTGAGCTAGAGTATGGAAGAGGGAAGTGGAATTCCGGGTGTAGCGGTGAAATGCGTAGATATCCGGAGGAACACCAGTGGCGAAGGCGACTTCCTGGTCCAATACTGACGCTGATGTGCGAAAGCG	Fall/Winter	0.608798	9.88913e-26		Proteobacteria_2701			Bacteria	Proteobacteria		Gammaproteobacteria			Thiolapillus	Thiolapillus brandeum		Thiolapillus brandeum						Fall/Winter	Fall/Winter	0.534696	1.43e-11			Fall/Winter	Fall/Winter	0.596609	5.06958e-22
CGTTATTCGGAATTACTGGGCGTAAAGCGCGCGTAGGCGGATTAGTAAGTCAGTGGTGAAAGCCCGGGGCTCAACCCCGGAACTGCCTTTGATACTGCTAGTCTTGAGTTCGAGAGAGGTGAGTGGAATTTCTAGTGTAGAGGTGAAATTCGTAGATATTAGAAAGAACACCAGTGGCGAAGGCGGCTCACTGGCTCGATACTGACGCTGAGGTGCGAAAGCG	Fall/Winter	0.608472	1.06634e-25		Proteobacteria_5610			Bacteria	Proteobacteria		Alphaproteobacteria	Rhizobiales	Hyphomicrobiaceae				Hyphomicrobiaceae						Fall/Winter	Fall/Winter	0.615675	9.28e-16			Fall/Winter	Fall/Winter	0.587549	2.96477e-21
CGTTGTTCGGAATTACTGGGCGTAAAGGGCACGTAGGCGGCGATGCGGGTCAGGTGTGAAAGCCCCGGGCTTAACCTGGGAACTGCACTTGAAACTGCATTGCTAGAGGACGGAAGAGGAGAATGGAATTCCCAGTGTAGAGGTGAAATTCGTAGATATTGGGAAGAACACCAGTGGCGAAGGCGATTCTCTGGTCCGTATCTGACGCTGAGGTGCGAAAGCG	Fall/Winter	0.604145	2.88217e-25		Proteobacteria_5221			Bacteria	Proteobacteria		Alphaproteobacteria	Holosporales	Caedimonadaceae	Candidatus Nucleicultrix	Candidatus Nucleicultrix amoebiphila	Candidatus Nucleicultrix amoebiphila FS5	Candidatus Nucleicultrix amoebiphila FS5						Fall/Winter	Fall/Winter	0.49628	6.01e-10			Fall/Winter	Fall/Winter	0.594909	7.09118e-22
CGTTAATCGGAATTACTGGGCGTAAAGCGCGCGTAGGTGGTTTGTTAAGTGGGATGTGAAAGCCCCGGGCTCAACCTGGGAATTGCACCCCAAACTGGCAAACTAGAGTACAAGAGAGGGGTGTGGAATTTCCTGTGTAGCGGTGAAATGCGTAGATATAGGAAGGAACATCAGTGGCGAAGGCGACGCCCTGGCTTGATACTGACACTGAGGTGCGAAAGCG	Fall/Winter	0.602981	3.75631e-25		Proteobacteria_6937			Bacteria	Proteobacteria		Gammaproteobacteria	Oceanospirillales	Oceanospirillaceae	Marinomonas			Marinomonas						Fall/Winter	Fall/Winter	0.555756	1.49e-12			Fall/Winter	Fall/Winter	0.600586	2.29398e-22
CGTTATTCGGATTTACTGGGCGTAAAGGGTTCGTAGGCGGTTTTTTAAGTTAGATGTGAAAGCTTGAAGCTTAACTTCAAAATAGCATCTAAAACTGAATTACTAGATTCTTGGAGAGGTAGATGGAATTACCGGTGTAGCGGTGAAATGCGTAGATATCGGTAGGAACACCAGTGGCGAAAGCGATCTACTGGACAAGTAATGACGCTGAGGGACGAAAGCG	Fall/Winter	0.601115	5.73072e-25		Verrucomicrobia_6			Bacteria	Verrucomicrobia	PVC group	Opitutae						Opitutae						Fall/Winter	Fall/Winter	0.607955	2.62e-15			Fall/Winter	Fall/Winter	0.589442	2.05927e-21
CGTAGTTCGGAATTACTGGGCTTAAAGAGCTCGTAGGTGGTTAAAAAAGTTGATGGTGAAATCCCAAGGCTCAACCTTGGAACTGCCATCAAAACTTTTTAGCTAGAGTGTGATAGAGGTAAGTGGAATTTCTAGTGTAGAGGTGAAATTCGTAGATATTAGAAAGAACACCAAATGCGAAGGCAACTTACTGGGTCACTACTGACACTGAGGAGCGAAAGCA	Fall/Winter	0.595687	1.92815e-24		Proteobacteria_5217			Bacteria	Proteobacteria		Alphaproteobacteria	Pelagibacterales	Pelagibacteraceae	Candidatus Pelagibacter			Candidatus Pelagibacter						Fall/Winter	Fall/Winter	0.740194	3.31e-25			Fall/Winter	Fall/Winter	0.516193	5.69174e-16
CGTTATTCGGAATTATTGGGCGTAAAGGGCTCGCAGGCTGCTTGAACAGTTAGACGTGAAATCCCCGGGCTCAACCTGGGAACTGCGTTTAATACTAGCAAGCTAGAGAAATAGAGAGGAAAGTGGAACTCCCAGTGTAGAGGTGAAATTCGTAGATATTGGGAAGAACACCAGTGGCGAAAGCGACTTTCTGGCTATTTTCTGACGCTGAGGAGCGAAAGCG	Fall/Winter	0.595419	2.04592e-24		Proteobacteria_6566			Bacteria	Proteobacteria	SAR116 cluster	Alphaproteobacteria			Candidatus Puniceispirillum	Candidatus Puniceispirillum marinum	Candidatus Puniceispirillum marinum IMCC1322	Candidatus Puniceispirillum marinum IMCC1322						Fall/Winter	Fall/Winter	0.63774	4.05e-17			Fall/Winter	Fall/Winter	0.541512	1.05443e-17
CGTTGTTCGGAATTACTGGGCGTAAAGCGCATGTAGGCGGAACAGAAAGTTAGAAGTGAAATCCCTGGGCTCAACCTAGGAATTGCTTTTAAAACTTCTGTTCTGGAATTAAGGAGAGGAAAATGGAATATCCAGTGTAGAGGTGAAATTCGTAGATATTGGATGGAACACCAGTGGCGAAGGCGATTTTCTGGACTTATATTGACGCTGAGATGCGAAGGCA	Fall/Winter	0.593508	3.11755e-24		Proteobacteria_6101			Bacteria	Proteobacteria		Alphaproteobacteria	Hyphomonadales	Hyphomonadaceae				Hyphomonadaceae						Fall/Winter	Fall/Winter	0.72274	1.42e-23			Fall/Winter	Fall/Winter	0.589226	2.14692e-21
CGTTATCCGGATTTATTGGGTTTAAAGGGTCCGTAGGCGGACGACTAAGTCAGTGGTGAAATCCAACAGCTCAACTGTTGAACTGCCATTGATACTGATCGTCTTGAGTATGTTAGATGTTGGCGGAATAGGTCATGTAGCGGTGAAATGCTTAGATATGACCTAGAACACCGATTGCGAAGGCAGCCAACAATGCCATTACTGACGCTGAGGGACGAAAGCG	Fall/Winter	0.591634	4.69958e-24		Bacteroidetes_1148			Bacteria	Bacteroidetes	FCB group	Flavobacteriia	Flavobacteriales					Flavobacteriales						Fall/Winter	Fall/Winter	0.588739	3.09e-14			Fall/Winter	Fall/Winter	0.620898	3.34436e-24
CGTTAATCGGAATTACTGGGCGTAAAGCGCGCGTAGGTGGTTTAATAAGCTAGCTGTGAAAGCCCCGGGCTTAACCTGGGAACTGCAGTTAGAACTGTTTGACTAGAGTATAATAGAGGGTGGCGGAATTTCCTGTGTAGCGGTGAAATGCGTAGATATAGGAAGGAACATCAGTGGCGAAGGCGGCCACCTGGATTAATACTGACACTGAGGTGCGAAAGCG	Fall/Winter	0.590289	6.29997e-24		Proteobacteria_1600			Bacteria	Proteobacteria		Gammaproteobacteria	Alteromonadales	Alteromonadaceae	Marinobacter	Marinobacter adhaerens	Marinobacter adhaerens HP15	Marinobacter adhaerens HP15						Fall/Winter	Fall/Winter	0.598197	9.37e-15			Fall/Winter	Fall/Winter	0.593454	9.43787e-22
CGTTGTCCGGATTTATTGGGCGTAAAGAGCTCGTAGGCGGTTCAACAAGTCGGTCGTGAAAGTTCAGGGCTCAACCCTGAAATGTCGATCGATACTGTTGTGACTAGGATACGGTAGAGGTGAGTGGAATTCCGAGTGTAGCGGTGAAATGCGTAGATATTCGGAGGAACACCAATTGCGAAGGCAGCTCACTGGGCCGCTATCGACGCTGAGGAGCGAAAGCT	Fall/Winter	0.587801	1.07913e-23		Actinobacteria_177			Bacteria	Actinobacteria	Terrabacteria group	Acidimicrobiia	Acidimicrobiales					Acidimicrobiales						Fall/Winter	Fall/Winter	0.709839	1.91e-22			Fall/Winter	Fall/Winter	0.585612	4.29403e-21
CGTTATCCGAAATGACTGGGCGTAAAGAGTCCGTAGACTGTACTGTAAGTTATTTGTTAAATCCTAAAGCTTAACTTTAGAATAGCCTATAATACTACTTTACTAGAGTTTTATTCAGAAGAGTAGAATTCCATGTTTAGGGATAAGCCCCGTAGATATATGGAGGAACACCTGTGGCGAAGGCGACTCTTTAGTAAAAACTGACGTTGAGGGACGAAAGTG	Fall/Winter	0.58292	3.06066e-23		Firmicutes_Tenericutes_884			Bacteria	Tenericutes	Terrabacteria group	Mollicutes	Mycoplasmatales	Mycoplasmataceae				Mycoplasmataceae						Fall/Winter	Winter/Spring	0.476153	3.58e-09			Fall/Winter	Fall/Winter	0.581267	9.77032e-21
CGTTAATCGGAATTACTGGGCGTAAAGCGCGCGTAGGCGGTTTGATAAGCTGGATGTGAAAGCCCCGGGCTCAACCTGGGAACTGCATCCAGAACTGTTTGACTAGAATACAATAGAGGTGAGTGGAATTTCCTGTGTAGCGGTGAAATGCGTAGATATAGGAAGGAACATCAGTGGCGAAGGCGACTCACTGGATTGATATTGACGCTAAGGTGCGAAAGCG	Fall/Winter	0.579676	6.06186e-23		Proteobacteria_1559			Bacteria	Proteobacteria		Gammaproteobacteria	Cellvibrionales	Microbulbiferaceae	Microbulbifer			Microbulbifer						Fall/Winter	Fall/Winter	0.518373	7.41e-11			Fall/Winter	Fall/Winter	0.573412	4.18763e-20
CGTTGTTCGGAATTACTGGGCGTAAAGCGCACGTAGGCGGATTAGAAAGTTAGAGGTGAAATCCCGGGGCTCAACCCCGGAACTGCCTTTAAAACTACTAGTCTAGAGTTCGAGAGAGGTGAGTGGAATTCCGAGTGTAGAGGTGAAATTCGTAGATATTCGGAGGAACACCAGTGGCGAAGGCGGCTCACTGGCTCGATACTGACGCTGAGGTGCGAAAGTG	Fall/Winter	0.571094	3.56433e-22		Proteobacteria_6000			Bacteria	Proteobacteria		Alphaproteobacteria	Rhodobacterales	Rhodobacteraceae				Rhodobacteraceae						Fall/Winter	Fall/Winter	0.428091	1.63e-07			Fall/Winter	Fall/Winter	0.499391	6.72631e-15
CGTTATCCGGAATTATTGGGTTTAAAGGGTCCGCAGGCTGTTTGTTAAGTTAGAGGTGAAATCCTACCGCTCAACGGTAGAACTGCCTTTAAAACTGGCAAACTTGAGTTATTGTGAAGTAATTAGAATGTGTAGTGTAGCGGTGAAATGCATAGATATTACACAGAATACCGATTGCGAAAGCAGATTACTAACAATTAACTGACGCTGAGGGACGAAAGCG	Fall/Winter	0.569106	5.33363e-22		Bacteroidetes_903			Bacteria	Bacteroidetes	FCB group	Flavobacteriia	Flavobacteriales	Flavobacteriaceae				Flavobacteriaceae						Fall/Winter	Fall/Winter	0.560083	9.18e-13			Fall/Winter	Fall/Winter	0.541926	9.85156e-18
TGTTATCCGGAATTATTGGGCGTAAAGCGTCTGTAGGTGGTTTAATAAGTCTATTGTTAAAGCTTGAAACTTAACTTCAGAGATGCAGTAGAAACTGTTAAACTAGAGTATAATTGAGGTAGAAGGAATTTCCAGTGGAGTGGTGAAATGCGTAGATATTGGAAAGAACACCAATTGCGAAGGCATTCTATTAAATTATTCTGACACTCAGAGACGAAAGCT	Fall/Winter	0.569048	5.39659e-22		Cyanobacteria_155			Bacteria	Cyanobacteria	Cyanobacteria/Melainabacteria group		Chroococcales					Chroococcales						Fall/Winter	Fall/Winter	0.68516	1.89e-20			Fall/Winter	Fall/Winter	0.538375	1.76048e-17
CGTTAATCGGAATTACTGGGCGTAAAGCGTGCGCAGGCGGTTTGCTAAGACAGTTGTGAAATCCCCGGGCTCAACCTGGGAACTGCAATTGTGACTGGTAGACTAGAGTTTGGCAGAGGGGGGTGGAATTCCTGGTGTAGCAGTGAAATGCGTAGATATCAGGAGGAACACCGATGGCGAAGGCAGCCCCCTGGGCCATGACTGACGCTCATGTACGAAAGCG	Fall/Winter	0.567579	7.25566e-22		Proteobacteria_3592			Bacteria	Proteobacteria		Betaproteobacteria												Fall/Winter	Fall/Winter	0.451095	2.82e-08			Fall/Winter	Fall/Winter	0.544337	6.61636e-18
CGTTATTCGGAATTACTGGGCTTAAAGGGTGCGTAGGCTGCACGGAAAGTTGGGTGTGAAAGCCCTCAGCTCAACTGAGGAATTGCATCCAAAACTGCCGTGCTTGAGGGAGACAGAGGTGAGCGGAACTCAAGGTGGAGCGGTGAAATGCGTTGATATCTTGAGGAACACCGGTGGCGAAAGCGGCTCACTGGGTCTCTTCTGACGCTGAGGCACGAAAGCT	Fall/Winter	0.561822	2.28213e-21		Planctomycetes_59			Bacteria	Planctomycetes	PVC group	Planctomycetia						Planctomycetia						Fall/Winter	Fall/Winter	0.425383	1.98e-07			Fall/Winter	Fall/Winter	0.530649	6.08113e-17
CGTTAATCGGAATTACTGGGCGTAAAGCGTGCGTAGGTGGTTTGTTAAGTCAGATGTGAAAGCCCCGGGCTCAACCTGGGAACTGCATTTGAAACTGGCTAACTAGAGTATAGGAGAGGAAAGTGGAATTTCAGGTGTAGCGGTGAAATGCGTAGATATCTGAAGGAACATCAATGGCGAAGGCAGCTTTCTGGACTAATACTGACACTGAGGTACGAAAGCG	Fall/Winter	0.556429	6.54356e-21		Proteobacteria_2656			Bacteria	Proteobacteria		Gammaproteobacteria			Candidatus Thioglobus	Candidatus Thioglobus autotrophicus		Candidatus Thioglobus autotrophicus						Fall/Winter	Fall/Winter	0.539095	9.01e-12			Fall/Winter	Fall/Winter	0.539514	1.46236e-17
CGTTGTTCGGAATTACTGGGCGTAAAGGGCGCGTAGGCGGCCAAGTCAGTCAGGCGTGAAAGCCCAGGGCTCAACCCTGGAATTGCGCTTGATACTGCTTGGCTCGAGACCGGAAGAGGGTAGTGGAATTCCCAGTGTAGAGGTGAAATTCGTAGATATTGGGAAGAACACCAGTGGCGAAGGCGGCTACCTGGTCCGGATCTGACGCTGAGGCGCGAAAGCG	Fall/Winter	0.554409	9.66219e-21		Proteobacteria_6566			Bacteria	Proteobacteria	SAR116 cluster	Alphaproteobacteria			Candidatus Puniceispirillum	Candidatus Puniceispirillum marinum	Candidatus Puniceispirillum marinum IMCC1322	Candidatus Puniceispirillum marinum IMCC1322						Fall/Winter	Fall/Winter	0.615832	9.08e-16			Fall/Winter	NA	NA	NA
CGTTATCCGGATTTATTGGGCGTAAAGCGCCTGTAGGTTGTTTAATAAGTCTGTTGTTAAAGACTAGGGCTTAACCCTAGGAAAGCAATGGAAACTACTAGACTTGAGTATGATAGGGGTAGAGGGAATTTCTAGTGTAGCGGTGAAATGCGTAGATATTAGAAAGAACACCGGTGGCGAAGGCGCTCTACTGGATCATTACTGACACTCAGAGGCGAAAGCT	Fall/Winter	0.5544	9.67871e-21		Cyanobacteria_148			Bacteria	Cyanobacteria	Cyanobacteria/Melainabacteria group		Synechococcales					Synechococcales						Fall/Winter	Fall/Winter	0.487874	1.28e-09			Fall/Winter	Fall/Winter	0.570367	7.28518e-20
CGTTATCCGGAATCACTGGGCATAAAGCGTCTGTAGGTTGTTTAGTAAGTCTGCTGTTAAAGACTGGGGCTCAACCCCAGAAAAGCAGTGGAAACTGCTAGACTTGAGTGTGGTAGAGGTAGAGGGAATTCCTAGTGTAGCGGTGAAATGCGTAGATATTAGGAAGAACACCAATGGCGAAGGCACTCTACTGGGCCATAACTGACACTCAGAGACGACAGCT	Fall/Winter	0.544102	6.77688e-20		Cyanobacteria_154			Bacteria	Cyanobacteria	Cyanobacteria/Melainabacteria group		Chroococcales					Chroococcales						Fall/Winter	Fall/Winter	0.450132	3.04e-08			Fall/Winter	Fall/Winter	0.473107	2.46561e-13
CGTTATCCGGATTTATTAGGTTTAAAGGGTTCGCAGGCGGAATTTTAAGTCAGTGGTGAAAGCCTATAGCTCAACTATAGAACTGCCACTGATACTGATATTCTTGAGTATAGATGAAGTGGGCGGAATATGTCATGTAGCGGTGAAATGCATAGATATGACATGGAACACCAATTGCGAAGGCAGCTCACTAAACTATTACTGACGCTCATGAACGAAAGCA	Fall/Winter	0.537778	2.16677e-19		Bacteroidetes_518			Bacteria	Bacteroidetes	FCB group	Flavobacteriia	Flavobacteriales	Schleiferiaceae	Owenweeksia	Owenweeksia hongkongensis	Owenweeksia hongkongensis DSM 17368	Owenweeksia hongkongensis DSM 17368						Fall/Winter	Fall/Winter	0.520902	5.77e-11			Fall/Winter	Fall/Winter	0.532329	4.65704e-17
CGTTGTTCGGAATTACTGGGCGTAAAGGGCGCGCAGGCGGAATAGCAAGTCGGAGGTGAAAGCCCGGGGCTCAACCCCGGAGGGTCTTTCGAAACTGCTAATCTAGAGAGGGTCAGGGGCCAGCAGAATTCTTGGTGTAGAGGTGAAATTCGTAGATATCAAGAGGAATACCGGTGGCGAAAGCGGCTGGCTGGGGCCACTCTGACGCTGAGGCGCGAAAGCG	Fall/Winter	0.537531	2.26633e-19		Proteobacteria_5202			Bacteria	Proteobacteria		Alphaproteobacteria	Rickettsiales	Anaplasmataceae				Anaplasmataceae						Fall/Winter	Fall/Winter	0.587594	3.56e-14			Fall/Winter	Fall/Winter	0.589689	1.9634e-21
CGTTATTCGGAATGATTGGGCGTAAAGGGTCCGTAGGCGGTTTTTTAAGTTAGTTCTATAACTTTATGGGCTTAACCTGAAAAGTGAACTGAGACAAAAAAACTACGAGTTTGAGAGGGGATAGTGGAATTCCTAGTGTAAGGATAAAATCTCTAGATATTAGGAGGAACTTCAGTAGGCGAAGGCGACTATCTGGCTCAAAACTGACGCTGAGGGACGAAAGTA	Fall/Winter	0.531419	6.80472e-19		Proteobacteria_5209			Bacteria	Proteobacteria		Alphaproteobacteria	Rickettsiales	Anaplasmataceae	Neorickettsia			Neorickettsia						Fall/Winter	Fall/Winter	0.618942	5.93e-16			Fall/Winter	Fall/Winter	0.559668	4.87666e-19
CGTTACTCGGATTCACTGGGCGTAAAGGGTGCGTAGGCGGCTAGGTGTGTTAGGTGTGAAATCTCGGGGCTCAACCTCGAAACTGCGCCTAAAACTGCCTAGCTAGAGTATTGGAGAGGTAAGCGGAATTTCTGGTGTAGCGGTGAAATGCGTAGATATCAGAAGGAACACCAATGGCGAAGGCAGCTTACTGGACAATAACTGACGCTGAGGCACGAAAGCG	Fall/Winter	0.52271	3.13883e-18		Verrucomicrobia_5			Bacteria	Verrucomicrobia	PVC group	Opitutae	Puniceicoccales	Puniceicoccaceae	Coraliomargarita	Coraliomargarita akajimensis	Coraliomargarita akajimensis DSM 45221	Coraliomargarita akajimensis DSM 45221						Fall/Winter	Fall/Winter	0.569398	3.16e-13			Fall/Winter	Fall/Winter	0.504209	3.35922e-15
TGGTCGTCGCTTTTATTGGGCCTAAAACGTCCGTAGCCTGTTTGGTAAATCTGTGGGTAAATCAACCAGCTTAACTGGTTGAATTCTGCAGAGACTGCCAGACTAGGGACCGGGAGAGGTGTGGGGTACTCTAGGGGTAGGGGTAAAATCCTGTCATCCTTAGAGGACCACCAGTTGCGAAGGCGCCACACTGGAACGGATCCGACGGTCAGGGACGAAGCCT	Fall/Winter	0.509405	2.98597e-17		archaea_4			Archaea	Euryarchaeota	Diaforarchaea group	Thermoplasmata	Methanomassiliicoccales					Methanomassiliicoccales						Fall/Winter	Fall/Winter	0.580878	8.1e-14			Fall/Winter	Fall/Winter	0.533669	3.75991e-17
CGTTAATCGGAATTACTGGGCGTAAAGCGCGCGTAGATGGTCTGTTTAGTTGGGTGTGAAATCCCTGGGCTCAACCTAGGAACTGCATTCAAAACTTACAGACTAGAGTACGAAAGAGGAGAGCAGAATTCATGGTGTAGCGGTGAAATGCGTAGATATCATGAGGAATACCAGTGGCGAAGGCGGCTCTCTGGTTCGAGACTGACATTGAGGTGCGAAAGCG	Fall/Winter	0.50925	3.06346e-17		Proteobacteria_1591			Bacteria	Proteobacteria		Gammaproteobacteria	Cellvibrionales	Halieaceae				Halieaceae						Fall/Winter	Fall/Winter	0.554292	1.75e-12			Fall/Winter	Fall/Winter	0.484141	5.64311e-14
CGTTATCCGGAATCACTGGGCATAAAGCGTCTGTAGGTGGTTTAGTAAGTCTGCTGTTAAAGACTGGGGCTCAACCCCAGAAAAGCAGTGGAAACTGCTAGACTTGAGTGTGGTAGAGGTAGAGGGAATTCCTAGTGTAGCGGTGAAATGCGTAGATATTAGGAAGAACACCAATGGCGAAGGCACTCTACTGGGCCATAACTGACACTGAGAGACGACAGCT	Fall/Winter	0.501575	1.0742e-16		Cyanobacteria_154			Bacteria	Cyanobacteria	Cyanobacteria/Melainabacteria group		Chroococcales					Chroococcales						Fall/Winter	Fall/Winter	0.436572	8.65e-08			Fall/Winter	Fall/Winter	0.50624	2.49831e-15
CGTTGTTCGGAATTACTGGGCGTAAAGCGCACGTAGGCGGATTAGTCAGTCAGAGGTGAAATCCCGAGGCTCAACCTCGGAACTGCCTTTGATACTGCTAGTCTAGAGTTCGAGAGAGGTGAGTGGAATTCCGAGTGTAGAGGTGAAATTCGTAGATATTCGGAGGAACACCAGTGGCGAAGGCGGCTCACTGGATCGATACTGACGCTGAGGTGCGAAAGCG	Fall/Winter	0.489298	7.49574e-16		Proteobacteria_5850			Bacteria	Proteobacteria		Alphaproteobacteria	Rhodobacterales	Rhodobacteraceae	Paraoceanicella	Paraoceanicella profunda		Paraoceanicella profunda						Fall/Winter	Fall/Winter	0.365718	1.03e-05			Fall/Winter	Fall/Winter	0.502997	4.00387e-15
CGTTGTCCGGAATCACTGGGCGTAAAGGGTCCGTAGGCGGTTTGATAAGTCTCATATGAAAGCTTCAAGCTCAACTTGGAGATGTTGTGAGATACTGTCAGACTAGAGACTGTTAGAGGTAAGTGGAATTCCAGGTGTAGTGGTGAAATGCGTAGATATCTGGAGGAACACCAGTGGCGAAAGCGACTTACTGGGACAGTTCTGACGCTAAGGGACGAAAGCG	Fall/Winter	0.4865	1.15454e-15		Chloroflexi_1			Bacteria	Chloroflexi	Terrabacteria group	Anaerolineae	Anaerolineales	Anaerolineaceae	Anaerolinea	Anaerolinea sp. 'rifampicinis'		Anaerolinea sp. 'rifampicinis'						Fall/Winter	Fall/Winter	0.391172	2.1e-06			Fall/Winter	Fall/Winter	0.476302	1.61754e-13
CGTTACTCGGAATCACTGGGCGTAAAGAGAATGTAGGCGGGTAGATAAGTTTGAAGTGAAATCCAATGGCTCAACCATTGAACTGCTTTGAAAACTGTTTACCTAGAATATGGGAGAGGTAGATGGAATTTCTGGTGTAGGGGTAAAATCCGTAGAGATCAGAAGGAATACCGATTGCGAAGGCGATCTACTGGAACATTATTGACGCTGAGATTCGAAAGCG	Fall/Winter	0.484152	1.654e-15		Proteobacteria_4957			Bacteria	Proteobacteria		Epsilonproteobacteria	Campylobacterales	Campylobacteraceae	Poseidonibacter	Poseidonibacter lekithochrous		Poseidonibacter lekithochrous						Fall/Winter	Fall/Winter	0.540263	7.97e-12			Fall/Winter	Fall/Winter	0.530674	6.05715e-17
CGTTATTCGGAATAACTGGGCGTAAAGCGAGCGTAGGCGGATTTGTAAGTTGGAGGTGAAATCCCAGGGCTTAACCCTGGAACTGCCTTCAAAACTACATTTCTTGAGTTTGGTAGAGGAGAGTGGAATTCCTAGTGTAGAGGTGAAATTCGTAGATATTAGGAGGAACACCAGTGGCGAAGGCGACTCTCTGGGCCAATACTGACGCTGAGGTTCGAAAGCA	Fall/Winter	0.483681	1.77692e-15		Proteobacteria_6102			Bacteria	Proteobacteria		Alphaproteobacteria	Caulobacterales	Caulobacteraceae	Terricaulis	Terricaulis silvestris		Terricaulis silvestris						Fall/Winter	Fall/Winter	0.421522	2.62e-07			Fall/Winter	Fall/Winter	0.471077	3.21572e-13
CGTTGTCCGGATTTATTGGGCGTAAAGAGCTCGTAGGCGGTTCAGTTAGTCGGGTGTGAAAACTCTGGGCTCAACCCAGAGACGCCACTCGATACTGCTGTGACTAGAGTGCGGTAGGGGAGCGGGGAATTCCTAGTGTAGCGGTGAAATGCGCAGATATTAGGAGGAACACCAGTGGCGAAGGCGCCGCTCTGGGCCGTAACTGACGCTGAGGAGCGAAAGCG	Fall/Winter	0.482533	2.1158e-15		Actinobacteria_174			Bacteria	Actinobacteria	Terrabacteria group	Acidimicrobiia	Acidimicrobiales	Ilumatobacteraceae	Ilumatobacter	Ilumatobacter coccineus	Ilumatobacter coccineus YM16-304	Ilumatobacter coccineus YM16-304						Fall/Winter	Fall/Winter	0.698839	1.57e-21			Fall/Winter	Fall/Winter	0.524015	1.71965e-16
TGTTATTCGGAGTGATTAGGCGTAAAGGGTCCTTTAAGCGGATTGATCAGTTGGAGCAAGAAATAAAAGAGCTTAACTCTTTTGATTCTCCAATACTGTCATTCTTGAGTTTATCAGAGTTTAGTAGAACTTACGGAGTAGGGATAAAATCCATTAATATCGTAGGGAACACCGGTGGCGAAGGCGACTATTCATGATAAGACTGACGCTGTAAGACGAAGGCG	Fall/Winter	0.481414	2.50628e-15		Proteobacteria_6887			Bacteria	Proteobacteria		Gammaproteobacteria	Oceanospirillales	Halomonadaceae	Candidatus Carsonella	Candidatus Carsonella ruddii		Candidatus Carsonella ruddii						Fall/Winter	Fall/Winter	0.405104	8.28e-07			Fall/Winter	Fall/Winter	0.510986	1.24157e-15
TGGTAGTCGCTTTTATTGGGCCTAAAACGTCCGTAGCCGGTCTGGTACATTCGTGGGTAAATCAACTCGCTCAACGAGTTGAATTCTGCGAGGACGGCCAGACTTGGGACCGGGAGAGGTGTGGGGTACTCTCAGGGTAGGGGTAAAATCCTGTCATCCTGAGAGGACCACCTGTTGCGAAGGCTCCACACTAGAACGGATCCGACGGTCAGGGACGAAGCCT	Fall/Winter	0.480731	2.77848e-15		archaea_4			Archaea	Euryarchaeota	Diaforarchaea group	Thermoplasmata	Methanomassiliicoccales					Methanomassiliicoccales						Fall/Winter	Fall/Winter	0.226157	0.00764796			Fall/Winter	Fall/Winter	0.47421	2.13271e-13
CGTTATTCGGAATCACTGGGCTTAAAGGGTGCGTAGGCGGCTTTGCAAGTGGGATGTGAAATCCCTCAGCTCAACTGAGGAACTGCGTTCCAAACTGCAAAGCTAGAGGGAGACAGAGGTAAGCGGAACTGATGGTGGAGCGGTGAAATGCGTTGATATCATCAGGAACACCAGTGGCGAAGGCGGCTTACTGGGTCTCTTCTGACGCTGAGGCACGAAAGCT	Fall/Winter	0.480663	2.80716e-15		Planctomycetes_44			Bacteria	Planctomycetes	PVC group	Planctomycetia	Pirellulales	Pirellulaceae	Pirellula	Pirellula staleyi	Pirellula staleyi DSM 6068	Pirellula staleyi DSM 6068						Fall/Winter	Fall/Winter	0.400321	1.14e-06			Fall/Winter	Fall/Winter	0.464057	7.94869e-13
CGTTATTCGGAATTACTGGGCGTAAAGCGAGCGTAGGCTGATTTGTAAGTTGGATGTGAAATCCCAGAGCTTAACTCTGGAACTGCATCCAAAACTATATTTCTTGAGTTTGGTAGAGGAGAGTGGAATTCCTAGTGTAGAGGTGAAATTCGTAGATATTAGGAGGAACACCAGTGGCGAAGGCGACTCTCTGGGCCAATACTGACGCTGAGGTTCGAAAGCG	Fall/Winter	0.480523	2.86724e-15		Proteobacteria_5170			Bacteria	Proteobacteria		Alphaproteobacteria	Rickettsiales	Anaplasmataceae	Wolbachia			Wolbachia						Fall/Winter	Fall/Winter	0.539673	8.48e-12			Fall/Winter	Fall/Winter	0.441674	1.24508e-11
CGTTAATCGGAATTACTGGGCGTAAAGCGCGCGTAGGTGGTTTGATAAGCTAGCTGTGAAAGCCCCGGGCTCAACCTGGGAACTGCAGTTAGAACTGTCTGGCTAGAGTACAGTAGAGGGTGGCGGAATTTCCTGTGTAGCGGTGAAATGCGTAGATATAGGAAGGAACATCAGTGGCGAAGGCGGCCACCTGGACTGATACTGACACTGAGGTGCGAAAGCG	Fall/Winter	0.475986	5.65235e-15		Proteobacteria_1634			Bacteria	Proteobacteria		Gammaproteobacteria	Oceanospirillales	Hahellaceae	Spartinivicinus	Spartinivicinus ruber		Spartinivicinus ruber						Fall/Winter	Fall/Winter	0.326697	9.2e-05			Fall/Winter	Fall/Winter	0.440632	1.40831e-11
CGTTGTCCGGAATCACTGGGCGTAAAGGGTCCGTAGGCGTTTCAATAAGTCATATGTTAAAGACACCGGCTTAACCGGTGACCTGCATTTGAAACTGTTGAAATAGAGTATAGGAGAGGAAAGTGGAATTCCTGGTGTAGCGGTGACATGCGTAGATATCAGGAGGAACATCAATGGCGAAGGCAGCTTTCTGGCCTATTACTGACGCTGAGGGACGAAAGCG	Fall/Winter	0.475855	5.76311e-15		Firmicutes_Tenericutes_3380			Bacteria	Firmicutes	Terrabacteria group	Clostridia	Halanaerobiales	Halanaerobiaceae				Halanaerobiaceae						Fall/Winter	Winter/Spring	0.524937	3.86e-11			Fall/Winter	Fall/Winter	0.45646	2.06846e-12
TGGTCAGGATGATTATTGGGCCTAAAGCATCCGTAGCCTGTTCTGTAAGTTTTCGGTTAAATCTATGCGCTCAACGTATAGGCTGCCGAAAATACTGCAGAACTAGGGAGTGGGAGAGGTAGACGGTACTCGGTAGGAAGGGGTAAAATCCTTTGATCTATTGATGACCACCTGTGGCGAAGGCGGTCTACCAGAACACGTTCGACGGTGAGGGATGAAAGCT	Fall/Winter	0.474991	6.55067e-15		archaea_192			Archaea	Thaumarchaeota	TACK group				Candidatus Nitrosopelagicus	Candidatus Nitrosopelagicus brevis		Candidatus Nitrosopelagicus brevis						Fall/Winter	Fall/Winter	0.564638	5.47e-13			Fall/Winter	Fall/Winter	0.491548	2.03503e-14
CGTTATCCGGAATCACTGGGCATAAAGCGTCTGTAGGTTGTTTAGTAAGTCTGCTGTTAAAGACTAGGGCTTAACCCTAGGCCAGCAGTGGAAACTGCTAGACTTGAGTGTGGTAGAGGTAGAGGGAATTCCTAGTGTAGCGGTGAAATGCGTAGATATTAGGAAGAACACCAATGGCGAAGGCACTCTACTGGGCCATAACTGACACTGAGAGACGACAGCT	Fall/Winter	0.474368	7.18252e-15		Cyanobacteria_154			Bacteria	Cyanobacteria	Cyanobacteria/Melainabacteria group		Chroococcales					Chroococcales						Fall/Winter	Fall/Winter	0.515629	9.69e-11			Fall/Winter	Fall/Winter	0.469703	3.8452e-13
CGTTGTTCGAAATTACTGGGCGTAAAGGGCGCGTAGGCGGTATAATTAGTCAGAGGTGAAATCCCTAAGCTTAACTTAGGAACTGCCTTTGATACTGTTATACTAGAGATCGAGAGAGGTGAGTGGAATTCCAAGTGTAGAGGTGAAATTCGTAGATATTTGGAAGAACACCAGTGGCGAAAGCGGCTCACTGGCTCGTTTCTGACGCTGAGGCGCGAAAGCG	Fall/Winter	0.471073	1.16556e-14		Proteobacteria_6067			Bacteria	Proteobacteria		Alphaproteobacteria	Rhodobacterales	Rhodobacteraceae	Dinoroseobacter	Dinoroseobacter shibae	Dinoroseobacter shibae DFL 12 = DSM 16493	Dinoroseobacter shibae DFL 12 = DSM 16493						Fall/Winter	Fall/Winter	0.270323	0.00134313			Fall/Winter	Fall/Winter	0.455528	2.32208e-12
CGTTGTTCGGAATCATTGGGCGTAAAGCGCGCGTAGGCGGTTACGTAAGTCTGATGTGAAAGCCCGGGGCTTAACCTCGGAAGTGCATCGGAAACTACGTGACTTGAGTCTCGGAGAGGGTGGTGGAATTCCAGGTGTAGAGGTGAAATTCGTAGATATCTGGAGGAACATCGGTGGCGAAGGCGACCACCTGGACGATGACTGACGCTGAGGTGCGAAAGCG	Fall/Winter	0.470063	1.3507e-14		Proteobacteria_4272			Bacteria	Proteobacteria		Deltaproteobacteria	Syntrophobacterales	Syntrophaceae				Syntrophaceae						Fall/Winter	NA	NA	NA			Fall/Winter	Fall/Winter	0.452506	3.37132e-12
CGTTGTCCGGATTTACTGGGCGTAAAGGGTACGTAGGCGTTTTAATAAGTTGTATGTTAAATATCTTAGCTTAACTAAGAAAGTGCATACAAAACTGTTAAGATAGAGTTTGAGAGAGGAACGCAGAATTCATGGTGGAGCGGTGACATGCGTAGATATCATGAGGAAAGTCAAATGCGAAGGCAGCCTTCTGGCTCAAAACTGACGCTGAGGTACGAAAGCG	Fall/Winter	0.453743	1.36758e-13		Nitrospirae_6			Bacteria	Nitrospirae		Nitrospira	Nitrospirales	Nitrospiraceae				Nitrospiraceae						Fall/Winter	Spring	0.441989	5.73e-08			Fall/Winter	Fall/Winter	0.413878	2.90038e-10
CGTTGTTCGGAATCACTGGGCGTAAAGCGTATGTAGGCGGATCAAAAAGTTAGATGTGAAATCCCTGGGCTCAACCCAGGAACTGCATTTAAAACTAGTGATCTAGAATTTGGTAGGGGTTAGTAGAATTTCCAGTGTAGAGGTGAAATTCGTAGATATTGGAAAGAATACCAGTGGCGAAGGCGACTAACTGGGCCATTTTTGACGCTGAGATACGAAAGCG	Fall/Winter	0.446081	3.88868e-13		Proteobacteria_5218			Bacteria	Proteobacteria		Alphaproteobacteria	Pelagibacterales					Pelagibacterales						Fall/Winter	Fall/Winter	0.527075	3.11e-11			Fall/Winter	NA	NA	NA
CGTTAATCGGAATTACTGGGCGTAAAGCGCGCGTAGATGGTTTATTCAGTTGGGTGTGAAATCCCTGGGCTCAACCCAGGAACTGCATTCAAAACTTATAAACTAGAGTACGAAAGAGGAGAGTAGAATTCATGGTGTAGCGGTGAAATGCGTAGAGATCATGAGGAATACCAGTGGCGAAGGCGACTCTCTGGTTCGAGACTGACATTGAGGTGCGAAAGCG	Fall/Winter	0.444587	4.75336e-13		Proteobacteria_3956			Bacteria	Proteobacteria		Gammaproteobacteria	Chromatiales	Thioalkalispiraceae	Sulfurivermis	Sulfurivermis fontis		Sulfurivermis fontis						Fall/Winter	Fall/Winter	0.753738	1.44e-26			Fall/Winter	Fall/Winter	0.387928	4.27246e-09
TGTTATCCGGAATTACTGGGCGTAAAGCGTCTGTAGGTGGTTTAGTAAGTCGATTGTTAAAGCTTGGGGCTTAACTCCAAAACAGCAATGGAAACTGCTAGACTTGAGTATGGTAGAGGTAAAAGGAATTTCCAGTGGAGCGGTGAAATGCGTAGATATTGGAAAGAACACCGATGGCGAAGGCATTTTACTGGGCCATAACTGACACTCAGAGACGAAAGCT	Fall/Winter	0.442843	6.0008e-13		Cyanobacteria_148			Bacteria	Cyanobacteria	Cyanobacteria/Melainabacteria group		Synechococcales					Synechococcales						Fall/Winter	Winter/Spring	0.289982	0.000560664			Fall/Winter	Fall/Winter	0.410654	4.10322e-10
CGTTGTTCGGAATTACTGGGCGTAAAGCGCGCGTAGGCGGATTAGACAGTTGAGGGTGAAATCCCGGAGCTTAACTCCGGAACTGCCTTCAATACTACTAATCTTGAGTTCGGAAGAGGTGAGTGGAATTCCTAGTGTAGAGGTGAAATTCGTAGATATTAGGAAGAACATCAGTGGCGAAGGCGACTCACTGGTCCGATACTGACGCTGAGGTGCGAAAGCG	Fall/Winter	0.442699	6.11738e-13		Proteobacteria_5270			Bacteria	Proteobacteria		Alphaproteobacteria	Rhizobiales	Rhodobiaceae	Pyruvatibacter	Pyruvatibacter mobilis		Pyruvatibacter mobilis						Fall/Winter	Fall/Winter	0.305294	0.000271475			Fall/Winter	Fall/Winter	0.332488	6.43322e-07
CGTTATCCGGAATTATTGGGTTTAAAGGGTCCGTAGGTGGACAATTAAGTCAGAGGTGAAATCCTGCAGCTCAACTGTAGAATTGCCTTTGAAACTGGTTGTCTTGAGTCATTATGAAGTGGTTAGAATGTGTAGTGTAGCGGTGAAATGCATAGATATTACACAGAATACCAATTGCGAAGGCAGATCACTAATAATGTACTGACACTGATGGACGAAAGCG	Fall/Winter	0.442183	6.55184e-13		Bacteroidetes_1027			Bacteria	Bacteroidetes	FCB group	Flavobacteriia	Flavobacteriales	Flavobacteriaceae				Flavobacteriaceae						Fall/Winter	Fall/Winter	0.305952	0.000262914			Fall/Winter	Fall/Winter	0.411297	3.83004e-10
CGTTATCCGGAATCATTGGGCGTAAAGCGCCTGTAGGTTGTTTAATAAGTCTGTTGTTAAAGACTAGGGCTCAACCCTAGGAAAGCAATGGAAACTACTAGACTTGAGTATGATAGGGGTAGAGGGAATTTCTAGTGTAGCGGTGAAATGCGTAGATATTAGAAAGAACACCGGTGGCGAAGGCGCTCTACTGGATCATTACTGACACTCAGAGGCGAAAGCT	Fall/Winter	0.440334	8.37275e-13		Cyanobacteria_148			Bacteria	Cyanobacteria	Cyanobacteria/Melainabacteria group		Synechococcales					Synechococcales						Fall/Winter	Fall/Winter	0.549216	3.06e-12			Fall/Winter	Fall/Winter	0.470162	3.6224e-13
CGTTAATCGGAATTACTGGGCGTAAAGCGCGCGTAGGTGGTTTGTTAAGTGGGATGTGAAAGCCCCGGGCTCAACCTGGGAATTGCATCCCAAACTGGCAAACTAGAGTACAAGAGAGGGGTGTGGAATTTCCTGTGTAGCGGTGAAATGCGTAGATATAGGAAGGAACATCAGTGGCGAAGGCGACGCCCTGGCTTGATACTGACACTGAGGTGCGAAAGCG	Fall/Winter	0.437475	1.2196e-12		Proteobacteria_2589			Bacteria	Proteobacteria		Gammaproteobacteria	Pseudomonadales	Pseudomonadaceae				Pseudomonadaceae						Fall/Winter	Fall/Winter	0.446601	4.01e-08			Fall/Winter	Fall/Winter	0.42291	1.07593e-10
CGTTGCTCGGAATTACTGGGCGTAAAGCGAGCGTAGGCGGTTAGTCAAGTTGGTGGTGAAAGCCCAGAGCTCAACTCTGGAACTGCCATCAAAACTGACTTACTTGAGATTGGTAGAGGGAAATGGAATTCCTAGTGTAGAGGTGAAATTCGTAGATATTGGGAAGAACATCGGTGGCGAAGGCGATTTCCTGGGCCAATTCTGACGCTGAGGTTCGAAAGCG	Fall/Winter	0.43542	1.59471e-12		Proteobacteria_6455			Bacteria	Proteobacteria		Alphaproteobacteria	Rhodospirillales	Rhodospirillaceae	Magnetospira	Magnetospira sp. QH-2		Magnetospira sp. QH-2						Fall/Winter	Fall/Winter	0.460096	1.37e-08			Fall/Winter	Fall/Winter	0.369471	2.52354e-08
CGTTAATCGGAATTACTGGGCGTAAAGCGCGCGTAGGCGGTTTGACAAGTTGGGTGTGAAATCCCCGGGCTTAACCTGGGAACTGCATTCAAAACTTTTAAACTGGAGTACGGGAGAGGAGAGTAGAATTCATGGTGTAGCGGTGAAATGCGTAGATATCATGAGGAATACCAATGGCGAAGGCAACTCTCTGGACCGTAACTGACGCTGAGGTGCGAAAGCG	Fall/Winter	0.428522	3.87239e-12		Proteobacteria_2650			Bacteria	Proteobacteria		Gammaproteobacteria			Candidatus Reidiella	Candidatus Reidiella endopervernicosa		Candidatus Reidiella endopervernicosa						Fall/Winter	Fall/Winter	0.718394	3.46e-23			Fall/Winter	Fall/Winter	0.355777	8.78723e-08
TGTTATTCAGAATTATTGGGCGTAAAGGGCATGTAGGTGGATGATTGGAGTTGATTGTGCCATTCCAATGGGATGCATTGGGTTTGCAATCAATACTCTTCATCTTGAGGTCAAAAGAGGAAAATAGAATTTCTAGTGGAGAGGTTAAATTCTTAGAGATTAGAAGGAATATCTAAAGCGAAGGCAATTTTCTGGTTTGAACCTGACACTGAGGTGCGAAAGCG	Fall/Winter	0.428185	4.04222e-12		Proteobacteria_6887			Bacteria	Proteobacteria		Gammaproteobacteria	Oceanospirillales	Halomonadaceae	Candidatus Carsonella	Candidatus Carsonella ruddii		Candidatus Carsonella ruddii						Fall/Winter	Fall/Winter	0.534345	1.48e-11			Fall/Winter	Fall/Winter	0.423435	1.01467e-10
CGTTATCCGGAATTATTGGGTTTAAAGGGTGCGTAGGCGGAAATTTAAGTCAGTGGTGAAAGCCTACAGCTTAACTGTAGAATTGCCATTGAAACTGAATTTCTTGAATCTAATTGAAGTAGGCGGAATATGACATGTAGCGGTGAAATGCTTAGATATGTCATAGAACACCGATAGCGAAGGCAGCTTACTAAGTTAGTATTGACGCTAATGCACGAAAGCG	Fall/Winter	0.423023	7.74408e-12		Bacteroidetes_1149			Bacteria	Bacteroidetes	FCB group	Flavobacteriia	Flavobacteriales	Crocinitomicaceae	Fluviicola	Fluviicola taffensis	Fluviicola taffensis DSM 16823	Fluviicola taffensis DSM 16823						Fall/Winter	Fall/Winter	0.5594	9.91e-13			Fall/Winter	Fall/Winter	0.443477	1.00494e-11
CGTTAATCGGAATTACTGGGCGTAAAGCGCGCGTAGGTGGTTTGTTAAGTGGAATGTGAAAGCCCTGGGCTCAACCTAGGAACTGCATCCCAAACTGACAGGCTAGAGTACAATAGAGGGGTGTGGAATTTCCTGTGTAGCGGTGAAATGCGTAGATATAGGAAGGAACACCAGTGGCGAAGGCGACACCCTGGATTGATACTGACACTGAGGTGCGAAAGCG	Fall/Winter	0.422242	8.53591e-12		Proteobacteria_2597			Bacteria	Proteobacteria		Gammaproteobacteria	Pseudomonadales	Pseudomonadaceae				Pseudomonadaceae						Fall/Winter	Fall/Winter	0.361101	1.35e-05			Fall/Winter	Fall/Winter	0.41149	3.7515e-10
CGTTGTTCGGAATCACTGGGCGTAAAGCGCGCGTAGGCGGATTGATTAGTTGGGGGTGAAATCCCGGAGCTCAACTCCGGAACTGCCTCCAATACTGTCAGTCTTGAGGTCGAGAGAGGTAAGTGGAATTCCGAGTGTAGAGGTGAAATTCGTAGATATTCGGAAGAACACCAGTGGCGAAGGCGACTTACTGGCTCGATTCTGACGCTGAGGTGCGAAAGCG	Fall/Winter	0.417632	1.50935e-11		Proteobacteria_5849			Bacteria	Proteobacteria		Alphaproteobacteria	Parvularculales	Parvularculaceae	Parvularcula	Parvularcula bermudensis	Parvularcula bermudensis HTCC2503	Parvularcula bermudensis HTCC2503						Fall/Winter	Fall/Winter	0.50909	1.82e-10			Fall/Winter	Fall/Winter	0.413435	3.04272e-10
CGTTGTTCGGAATTACTGGGCGTAAAGCGCACGTAGGCGGATTAGTCAGTCAGGGGTGAAATCCCGAGGCTCAACCTCGGAACTGCCTTTGATACTGCTAGTCTAGAGTTCGAGAGAGGTGAGTGGAATTCCGAGTGTAGAGGTGAAATTCGTAGATATTCGGAGGAACACCAGTGGCGAAGGCGGCTCACTGGATCGATACTGACGCTGAGGTGCGAAAGCG	Fall/Winter	0.415986	1.84615e-11		Proteobacteria_5850			Bacteria	Proteobacteria		Alphaproteobacteria	Rhodobacterales	Rhodobacteraceae	Paraoceanicella	Paraoceanicella profunda		Paraoceanicella profunda						Fall/Winter	Fall/Winter	0.465493	8.78e-09			Fall/Winter	Fall/Winter	0.414905	2.59483e-10
TGGTCGTCGCTTTTATTGGGCCTAAAACGTCCGTAGCCTGTTTGGTAAATCTGTGGGTAAATCAATCCGCTCAACGGATTGAATTCTGCAGAGACTGCCAGACTAGGGACCGGGAGAGGTGTGGGGTACTCGAGGGGTAGGGGTAAAATCCTGTCATCCTTCGAGGACCACCAGTTGCGAAGGCGCCACACTGGAACGGATCCGACGGTCAGGGACGAAGCCT	Fall/Winter	0.414929	2.09974e-11		archaea_4			Archaea	Euryarchaeota	Diaforarchaea group	Thermoplasmata	Methanomassiliicoccales					Methanomassiliicoccales						Fall/Winter	Fall/Winter	0.515619	9.7e-11			Fall/Winter	Fall/Winter	0.432061	3.82109e-11
TGTTATCCGGAATCACTGGGCGTAAAGCGTCTGTAGGTGGTTTAGTAAGTCTATTGTTAAATCTTGAGGCTCAACTTCAAATCAGCAATGGAAACTGCTAGACTCGAGTATGGTAGAGGTAAGGGGAATTTCCAGTGGAGCGGTGAAATGCGTAGATATTGGAAAGAACACCGATGGCGAAGGCACCTTACTGGGCCATTACTGACACTCAGAGACGAAAGCT	Fall/Winter	0.41444	2.22825e-11		Cyanobacteria_210			Bacteria	Cyanobacteria	Cyanobacteria/Melainabacteria group		Synechococcales	Acaryochloridaceae	Acaryochloris	Acaryochloris marina	Acaryochloris marina MBIC11017	Acaryochloris marina MBIC11017						Fall/Winter	Fall/Winter	0.485066	1.65e-09			Fall/Winter	Fall/Winter	0.415164	2.52297e-10
CGTTGTTCGGATTCACTGGGCGTAAAGCGTGCGTAGGCGGAGAAACAAGTTTGGCGTGAAAGCCCCGGGCCCAACCCGGAAAATGCGCTGAAAACTATTTCCCTAGAGGATTGGAGAGGAGACTGGAATTCCTGGTGTAGCAGTGAAATGCGTAGATATCAGGAGGAACACCGGTGGCGAAGGCGAGTCTCTGGACAATTCCTGACGCTGAGGTACGAAGGCC	Fall/Winter	0.414189	2.29714e-11		Verrucomicrobia_12			Bacteria	Verrucomicrobia	PVC group							PVC group						Fall/Winter	NA	NA	NA			Fall/Winter	Fall/Winter	0.401964	1.02643e-09
CGTTAATCGGAATTACTGGGCGTAAAGCGCGCGTAGGTGGTTTGTTAAGTGGAATGTGAAAGCCCTGGGCTCAACCTAGGAACTGCATCCCAAACTGACAGACTAGAGTACAATAGAGGGGTGTGGAATTTCCTGTGTAGCGGTGAAATGCGTAGATATAGGAAGGAACACCAGTGGCGAAGGCGACACCCTGGATTGATACTGACACTGAGGTGCGAAAGCG	Fall/Winter	0.405065	6.83381e-11		Proteobacteria_2597			Bacteria	Proteobacteria		Gammaproteobacteria	Pseudomonadales	Pseudomonadaceae				Pseudomonadaceae						Fall/Winter	Fall/Winter	0.588432	3.21e-14			Fall/Winter	Fall/Winter	0.601514	1.90363e-22
CGTTATCCGGAATTATTGGGCGTAAAGCGCGTCTAGGCGGTCTTTTAAGTCTGATGTTAAAATGCGGGGCTCAACTCCGTATTGCGTTGGAAACTGGAAGACTAGAGTATCAGAGAGGTGGGCGGAACTACAAGTGTAGAGGTGAAATTCGTAGATATTTGTAGGAATGCCGATTGGGAAGCCAGCTCACTGGATGAATACTGACGCTGAAGCGCGAAAGCG	Fall/Winter	0.396619	1.82095e-10		Fusobacteria_35			Bacteria	Fusobacteria		Fusobacteriia	Fusobacteriales	Fusobacteriaceae	Ilyobacter	Ilyobacter polytropus	Ilyobacter polytropus DSM 2926	Ilyobacter polytropus DSM 2926						Fall/Winter	Winter/Spring	0.294145	0.000462143			Fall/Winter	Fall/Winter	0.38893	3.86736e-09
CGTTATCCGGAATCATTGGGTTTAAAGGGTCCGCAGGCGGTCTATTAAGTCAGAGGTGAAATCCTATCGCTCAACGATAGAACTGCCTTTGATACTGGTAGACTTGAGTTATTGTGAAGTAGTTAGAATGTGTAGTGTAGCGGTGAAATGCATAGATATTACACAGAATACCGATTGCGAAGGCAGATTACTAACAATATACTGACGCTCAGGGACGAAAGCG	Fall/Winter	0.394854	2.22713e-10		Bacteroidetes_1111			Bacteria	Bacteroidetes	FCB group	Flavobacteriia	Flavobacteriales	Flavobacteriaceae				Flavobacteriaceae						Fall/Winter	Fall/Winter	0.228399	0.00705176			Fall/Winter	Fall/Winter	0.40242	9.78795e-10
CGTTATTCGGAATGATTGGGCGTAAAGGGTCCGTAGGCGGTTTTTTAAGTTGTTTTTATAATTTTAGGGCATAACCTTAAACTTGAAACAAAACTGAAAAACTAGAATTTGATAGAGGATAGTGGAATTCCTAGTGGAAGGATAAAATCTCTAGATATTAGGAGGAACATCAGAGGCGAAGGCGACTATCTGGATCAATATTGACGCTAAAGGACGAAAGTA	Fall/Winter	0.391763	3.15949e-10		Proteobacteria_5209			Bacteria	Proteobacteria		Alphaproteobacteria	Rickettsiales	Anaplasmataceae	Neorickettsia			Neorickettsia						Fall/Winter	Fall/Winter	0.56479	5.38e-13			Fall/Winter	Fall/Winter	0.397688	1.59612e-09
TGTTATCCGGAATCACTGGGCGTAAAGCGTCTGTAGGTGGTTTGATAAGTCAACTGTTAAATCTTGAGGCTCAACTTCAAAATCGCAGTCGAAACTATTAGACTAGAGTATAGTAGAGGTAAAGGGAATTTCCAGTGGAGCGGTGAAATGCGTAGATATTGGAAAGAACACCGATGGCGAAAGCACTTTACTGGGCTATTACTAACACTCAGAGACGAAAGCT	Fall/Winter	0.389107	4.25536e-10		Cyanobacteria_135			Bacteria	Cyanobacteria	Cyanobacteria/Melainabacteria group													Fall/Winter	Winter/Spring	0.653895	3.46e-18			Fall/Winter	Fall/Winter	0.367903	2.91972e-08
CGTTATCCGGAATCATTGGGTGTAAAGCGCCTGTAGGTTGTTTGATAAGTCTGTTGTTAAAGCCTAGGGCTTAACCCTAGAAAAGCGATGGAAACTACCAGACTAGAGTATGGAAGGGGTAGAGGGAATTTCTAGTGTAGCGGTGAAATGCGTAGATACTAGAAAGAACACCAGAAGCGAAAGCGCTCTACTGGGCCAGTACTGACACTCAGAGGCGAAAGCT	Fall/Winter	0.387396	5.1471e-10		Cyanobacteria_154			Bacteria	Cyanobacteria	Cyanobacteria/Melainabacteria group		Chroococcales					Chroococcales						Fall/Winter	Fall/Winter	0.430542	1.36e-07			Fall/Winter	Fall/Winter	0.351197	1.31657e-07
CGTTATCCGGATTTATTGGGCGTAAAGCGCCTGTAGGTTGTTTAATAAGTCTGTTGTTAAAGACTAGGGCTTAACCCTAGGAAAGCAATGGAAACTACTAGACTTGAGTATGATAGGGGTAGAGGGAATTTCTAGTGTAGCGGTGAAATGCGTAGATATTAGGAAGAACACCGGTGGCGAAGGCGCTCTACTGGATCATTACTGACACTCAGAGGCGAAAGCT	Fall/Winter	0.38482	6.84165e-10		Cyanobacteria_148			Bacteria	Cyanobacteria	Cyanobacteria/Melainabacteria group		Synechococcales					Synechococcales						Fall/Winter	Fall/Winter	0.386894	2.77e-06			Fall/Winter	Fall/Winter	0.358585	6.83602e-08
CGTTATTCGGAATGACTGGGCGTAAAGAGTTCGTAGGCGGTTTCTTAAGTTGATTTTAAAAATTTAGAGCATAACTCTAAAAATGGATCAAAACTGAGAAACTTGAGTTTGGTAGAGGATAGTGGAATTCCTAGTGGAAGGATAAAATCTCTAGAGATTAGGAGGAACATCAGAGGCGAAGGCGACTATCTGGACCAAAACTGACGCTAAAGAACGAAAGTA	Fall/Winter	0.383597	7.82395e-10		Proteobacteria_5124			Bacteria	Proteobacteria		Alphaproteobacteria						Alphaproteobacteria						Fall/Winter	NA	NA	NA			Fall/Winter	Fall/Winter	0.422411	1.13738e-10
TGTTATTCGGAATAATTGGGCGTAAATGGCGTGTAGGTTGTGCTTCGCTGTTATCGGTTAAATTCCCATCGATATGGTGGGTAAGGCTGATAGAACGGTTGTACTAGAGAGTGAGAGAGGATACGGGAATTTCGAGTGGAGAAGTTAAATTCTTAGATATTCGAAGGAAGGCCAACTGCGAAGGCACATATCTGGCTCATTTCTGACACTGAGGCGCGAAGGCG	Fall/Winter	0.383407	7.9885e-10		Proteobacteria_5170			Bacteria	Proteobacteria		Alphaproteobacteria	Rickettsiales	Anaplasmataceae	Wolbachia			Wolbachia						Fall/Winter	Fall/Winter	0.489935	1.07e-09			Fall/Winter	Fall/Winter	0.349025	1.5914e-07
TGTTATTCGGAATGATTGGGCGTAAAGCGTCTGTAGGCTGTATAGAAAGTCTTTTGTTAAATACCTCGGCTCAACCGAGATCCAGCAAAGGAAACTTCTATACTTGAGGTAAGTAGAGGTACAGGGAATTCCCGGTGGAGCGGTGAAATGCGTAGATATCGGGAGGAACACCAATATGGCGAAGGCACTGTACTGGGCTTTACCTGACGCTCAGAGACGAAAGCT	Fall/Winter	0.383287	8.0942e-10		Cyanobacteria_194			Bacteria	Cyanobacteria	Cyanobacteria/Melainabacteria group		Oscillatoriales	Oscillatoriaceae	Moorea	Moorea producens	Moorea producens PAL-8-15-08-1	Moorea producens PAL-8-15-08-1						Fall/Winter	Fall/Winter	0.27961	0.000895981			Fall/Winter	Fall/Winter	0.372499	1.9e-08
CGTTGTTCGGAATTACTGGGCGTAAAGCGTACGTAGGCGGATTAGTAAGTTAGAGGTGAAATCCCGGGGCTCAACCCCGGAACTGCCTTTAATACTGCTAGTCTTGAGTTCGAGAGAGGTGAGTGGAATTCCAAGTGTAGAGGTGAAATTCGTAGATATTTGGAGGAACACCAGTGGCGAAGGCGGCTCACTGGCTCGATACTGACGCTGAGGTACGAAAGTG	Fall/Winter	0.382323	8.993e-10		Proteobacteria_6064			Bacteria	Proteobacteria		Alphaproteobacteria	Rhodobacterales	Rhodobacteraceae				Rhodobacteraceae						Fall/Winter	Fall/Winter	0.373711	6.34e-06			Fall/Winter	Fall/Winter	0.362414	4.83521e-08
CGTTATCCGGATTTATTGGGTTTAAAGGGTCCGTAGGCGGGTCTTTAAGTCAGTGGTGAAAGCCTGCAGCTTAACTGTAGAATTGCCATTGATACTGAAGGCCTTGAGTGTAGTAGAAGTAGGCGGAATATGGCATGTAGCGGTGAAATGCATAGATATGCCATAGAACACCGATTGCGAAGGCAGCTTACTATGTTACAACTGACGCTGAGGGACGAAAGCG	Fall/Winter	0.381687	9.638e-10		Bacteroidetes_518			Bacteria	Bacteroidetes	FCB group	Flavobacteriia	Flavobacteriales	Schleiferiaceae	Owenweeksia	Owenweeksia hongkongensis	Owenweeksia hongkongensis DSM 17368	Owenweeksia hongkongensis DSM 17368						Fall/Winter	Spring	0.553328	1.95e-12			Fall/Winter	Fall/Winter	0.28187	2.85912e-05
CGTTATCCGGAATTATTGGGTTTAAAGGGTCCGTAGGTGGATAATTAAGTCAGAGGTGAAATCCTGCAGCTCAACTGTAGAATTGCCTTTGATACTGGTTATCTTGAGTCATTATGAAGTGGTTAGAATGTGTAGTGTAGCGGTGAAATGCATAGATATTACACAGAATACCAATTGCGAAGGCAGATCACTAATAATGTACTGACACTGATGGACGAAAGCG	Fall/Winter	0.379791	1.18385e-09		Bacteroidetes_1027			Bacteria	Bacteroidetes	FCB group	Flavobacteriia	Flavobacteriales	Flavobacteriaceae				Flavobacteriaceae						Fall/Winter	Fall/Winter	0.676581	8.42e-20			Fall/Winter	Fall/Winter	0.414703	2.65245e-10
CGTTGTCCGGAATCACTGGGCGTAAAGGGTCCGTAGGCGGTTTGATAAGTCTCATATGAAAACTTCAAGCTTAACTTGGAGAGGTTGTGAGATACTGTCAAACTAGAGACTGTTAGAGGTAAGTGGAATTCCAGGTGTAGTGGTGAAATGCGTAGATATCTGGAGGAACACCAGTGGCGAAAGCGACTTACTGGGACAGTTCTGACGCTAAGGGACGAAAGCG	Fall/Winter	0.37965	1.20214e-09		Chloroflexi_1			Bacteria	Chloroflexi	Terrabacteria group	Anaerolineae	Anaerolineales	Anaerolineaceae	Anaerolinea	Anaerolinea sp. 'rifampicinis'		Anaerolinea sp. 'rifampicinis'						Fall/Winter	Fall/Winter	0.355326	1.9e-05			Fall/Winter	Fall/Winter	0.378712	1.05152e-08
CGTTATCCGGAATCACTGGGTTTAAAGGGTGCGTAGGTGGTTATTTAAGTCAGAAGTGAAATCTTGCAGCTCAACTGTAAAACTGCTTTTGAAACTGAATAACTTGAATATTTTTGATGTGGGCGGAATGAGTCATGTAGCGGTGAAATGCGTAGATATGACTCAGAACACCGATTGCGAAGGCAGCTCACAAAGAAATATTGACACTGAGGCACGAAAGCG	Fall/Winter	0.375023	1.97425e-09		Bacteroidetes_225			Bacteria	Bacteroidetes	FCB group	Saprospiria	Saprospirales					Saprospirales						Fall/Winter	Fall/Winter	0.507684	2.08e-10			Fall/Winter	Fall/Winter	0.423463	1.01155e-10
CGTTATCCGGAATCATTGGGCGTAAAGCGCCTGTAGGTGGTTTAATAAGTCTGTTGTTAAAGACTAGGGCCCAACCCTAGAAAAGCAATGGAAACTACTAGACTGGAGTATGGCAGGGGTAGAGGGAATTTCTAGTGTAGCGGTGAAATGCGTAGATATTAGAAAGAACACCAGTGGCGAAAGCGCTCTACTGGACCATTACTGACACTCAGAGGCGAAAGCT	Fall/Winter	0.374605	2.06404e-09		Cyanobacteria_154			Bacteria	Cyanobacteria	Cyanobacteria/Melainabacteria group		Chroococcales					Chroococcales						Fall/Winter	NA	NA	NA			Fall/Winter	Fall/Winter	0.341279	3.09257e-07
CGTTGTTCGGAATTATTGGGCGTAAAGGGCGCGTAGGCGGGTTCTTAAGTCTGATGTGAAATCCCTCGGCTCAACCGAGGACGTGCATTGGATACTGGGAACCTTGAGTCCTGGAGAGGAAAGCGGAATTCCAAGTGTAGAGGTGAAATTCGTAGATATTTGGAGGAACACCAGTGGCGAAGGCGGCTTTCTGGACAGTGACTGACGCTGAGGCGCGAAAGCG	Fall/Winter	0.368566	3.89488e-09		Spirochaetes_147			Bacteria	Spirochaetes		Spirochaetia						Spirochaetia						Fall/Winter	Fall/Winter	0.416323	3.8e-07			Fall/Winter	Fall/Winter	0.422533	1.12197e-10
CGTTGTCCGGATTTATTGGGCGTAAAGAGCTCGTAGGCGGTTAGTCACGTCGGATGTGAAAACCCAGTGCTTAACACTGGGCCTGCATTCGATACGGGCTGACTAGAGTGTTGTAGGGGAGACTGGAACTCCTGGTGTAGCGGTGAAATGCGCAGATATCAGGAAGAACACCGGTGGCGAAGGCGGGTCTCTGGGCAACTACTGACGCTGAGGAGCGAAAGCG	Fall/Winter	0.367263	4.45897e-09		Actinobacteria_628			Bacteria	Actinobacteria	Terrabacteria group	Actinobacteria	Acidothermales	Acidothermaceae	Acidothermus	Acidothermus cellulolyticus	Acidothermus cellulolyticus 11B	Acidothermus cellulolyticus 11B						Fall/Winter	Fall/Winter	0.601472	6.14e-15			Fall/Winter	Fall/Winter	0.373039	1.80566e-08
CGTTAATCGGAATTACTGGGCGTAAAGCGCGCGTAGGTGGCCTGCTAAGCAGGATGTGAAAGCCCTGAGCTCAACTCAGGAACTGCATCCTGAACTGGCAAGCTAGAGTATAGTAGAGGATAGTGGAATTTCTGGTGTAGCGGTGAAATGCGTAGATATCAGAAGGAACATCAGTGGCGAAGGCGACTGTCTGGACTAATACTGACACTGAGGTGCGAAAGCG	Fall/Winter	0.362595	7.20481e-09		Proteobacteria_6918			Bacteria	Proteobacteria		Gammaproteobacteria	Oceanospirillales	Oceanospirillaceae	Bacterioplanes	Bacterioplanes sanyensis		Bacterioplanes sanyensis						Fall/Winter	Fall/Winter	0.38452	3.22e-06			Fall/Winter	Fall/Winter	0.330204	7.75336e-07
CGTTGTTCGGAATCACTGGGCGTAAAGGGCGTGTAGGCGGAACGACTAGCGAGGGGTGAAATCCCGGGGCTCAACCCCGGAACTGCTCTTCGAACTGTCGATCTAGAGAAGGTCAGGGGCCGGCGGAATTCCTGGTGTAGAGGTGAAATTCGTAGAGATCAGGAGGAACATCGGAGGCGAAGGCGGCCGGCTGGGGCCATTCTGACGCTGAGGCGCGAAAGCG	Fall/Winter	0.362246	7.46594e-09		phylum_reps_751																		Fall/Winter	Fall/Winter	0.317427	0.000148481			Fall/Winter	Fall/Winter	0.353927	1.03542e-07
CGTTATCCGGAATCATTGGGTTTAAAGGGTCCGTAGGTGGTTTATTAAGTCAGAGGTGAAATCCCATAGCTTAACTATGGAACTGCCTTTGATACTGATAGACTTGAGTTATTGTGAAGTGGTTAGAATGTGTAGTGTAGCGGTGAAATGCATAGATATTACACAGAATACCGATTGCGAAGGCAGATCACTAACAATATACTGACACTGAGGGACGAAAGCG	Fall/Winter	0.362157	7.5334e-09		Bacteroidetes_980			Bacteria	Bacteroidetes	FCB group	Flavobacteriia	Flavobacteriales	Flavobacteriaceae	Winogradskyella	Winogradskyella sp. J14-2		Winogradskyella sp. J14-2						Fall/Winter	Fall/Winter	0.399333	1.22e-06			Fall/Winter	Fall/Winter	0.384553	5.96114e-09
CGTTATCCGGAATCACTGGGCATAAAGCGTCTGTAGGTGGTTTGGTAAGTCTGCTGTTAAAGACTGGGGCTCAACCCCAGAAAAGCAGTGGAAACTGCTAGACTTGAGTGTGGTAGAGGTAGAGGGAATTCCTAGTGTAGCGGTGAAATGCGTAGATATTAGGAAGAACACCAATGGCGAAGGCACTCTACTGGGCCATAACTGACACTCAGAGACGACAGCT	Fall/Winter	0.360156	9.22989e-09		Cyanobacteria_154			Bacteria	Cyanobacteria	Cyanobacteria/Melainabacteria group		Chroococcales					Chroococcales						Fall/Winter	Fall/Winter	0.512128	1.36e-10			Fall/Winter	Fall/Winter	0.320174	1.72859e-06
CGTTAATCGGAATTACTGGGCGTAAAGCGTTCGTAGGCGGTCTATTAAGCAAGATGTGAAAGCCCAGGGCTCAACCTTGGAACTGCATTTTGAACTGGTAGACTAGAGTACTGTAGAGGGTGGTGGAATTTCCAGTGTAGCGGTGAAATGCGTAGAGATTGGAAGGAACATCAGTGGCGAAGGCGGCCACCTGGACAGATACTGACGCTGAGGAACGAAAGCG	Fall/Winter	0.359908	9.46355e-09		Proteobacteria_6966			Bacteria	Proteobacteria		Gammaproteobacteria	Alteromonadales	Colwelliaceae	Colwellia	Colwellia sp. 20A7		Colwellia sp. 20A7						Fall/Winter	Fall/Winter	0.332677	6.7e-05			Fall/Winter	Fall/Winter	0.396146	1.86888e-09
CGTTAATCGGAATTACTGGGCGTAAAGCGCGCGTAGGTGGTTTATTAAGTTGGATGTGAAATCCCCGGGCTCAACCTGGGAACTGCATCCAAAACTGATTCACTAGAGTACGATAGAGGGAGGTAGAATTCACAGTGTAGCGGTGGAATGCGTAGATATTGTGAAGAATACCAATGGCGAAGGCAGCCTCCTGGATCTGTACTGACACTGAGGTGCGAAAGCG	Fall/Winter	0.358101	1.13528e-08		Proteobacteria_3956			Bacteria	Proteobacteria		Gammaproteobacteria	Chromatiales	Thioalkalispiraceae	Sulfurivermis	Sulfurivermis fontis		Sulfurivermis fontis						Fall/Winter	Fall/Winter	0.409529	6.11e-07			Fall/Winter	Fall/Winter	0.322067	1.48913e-06
CGTTAATCGGAATTACTGGGCGTAAAGCGCGCGTAGGCGGTTTAGCAAGTTGTATGTGAAAGCCCTGGGCTCAACCTAGGAACTGCATCCAAAACTACTAAGCTAGAGTGCGAGAGAGGAGAGTAGAATTTCTGGTGTAGCGGTGAAATGCGTAGATATCAGAAGGAATACCAATGGCGAAGGCAGCTCTCTGGCTCGTCACTGACGCTGAGGTGCGAAAGCG	Fall/Winter	0.356518	1.33033e-08		Proteobacteria_2642			Bacteria	Proteobacteria		Gammaproteobacteria	Thiotrichales	Piscirickettsiaceae	Cycloclasticus	Cycloclasticus sp. P1		Cycloclasticus sp. P1						Fall/Winter	Spring	0.489478	1.11e-09			Fall/Winter	Fall/Winter	0.271231	5.81606e-05
CGTTAATCGGAATTACTGGGCGTAAAGCGTGCGTAGGCGGTTTATTAAGTCAGATGTGAAAGCCCCGGGCTTAACCTGGGAACTGCATTTGAAACTGGTAAACTAGAGTATGGTAGAGGAAAGTGGAATTTCTGGTGTAGCGGTGAAATGCGTAGATATCAGAAGGAACATCAATGGCGAAGGCAGCTTTCTGGACCAATACTGACGCTGAGGTACGAAAGCG	Fall/Winter	0.356049	1.39402e-08		Proteobacteria_2659			Bacteria	Proteobacteria		Gammaproteobacteria			Candidatus Thioglobus			Candidatus Thioglobus						Fall/Winter	Winter/Spring	0.405442	8.09e-07			Fall/Winter	Fall/Winter	0.315931	2.40589e-06
CGTTGTTCGGAATGACTGGGCGTAAAGAGAACGTAGGCGGATTCGTAAGTCGAATGTGAAAGCCCTGGGCTTAACCCAGGAATTGCATTCGAAACTGTGGATCTTGAATGTTTGAGAGGTTGGCGGAATTCCAGGTGTAGGAGTGAAATCCGTAGATATCTGGAGGAACACCGGAGGCGAAGGCGGCTAACTGGCAATACATTGACGCTGAGGTTCGAAAGCG	Fall/Winter	0.355648	1.45081e-08		Proteobacteria_4399			Bacteria	Proteobacteria		Oligoflexia	Bdellovibrionales	Bdellovibrionaceae	Bdellovibrio			Bdellovibrio						Fall/Winter	Fall/Winter	0.391788	2.01e-06			Fall/Winter	Fall/Winter	0.358726	6.74978e-08
CGTTATCCGGAATCATTGGGCGTAAAGCGTCTGTAGGTGGCTTGGTAAGTCGACTGTTAAATCGTAGAGCTTAACTCTATATCGGCAGTCGAAACTACTTCGCTTGAGTGTGGTAGGGGCAGAGGGAATTCCCGGTGTAGCGGTGAAATGCGTAGATATCGGGAAGAACACCAACGGCGAAAGCACTCTGCTGGGCCAACACTGACACTGAGAGACGAAAGCT	Fall/Winter	0.355348	1.49482e-08		Cyanobacteria_221			Bacteria	Cyanobacteria	Cyanobacteria/Melainabacteria group		Synechococcales	Synechococcaceae	Synechococcus	Synechococcus sp. Minos11		Synechococcus sp. Minos11						Fall/Winter	Fall/Winter	0.243312	0.00403246			Fall/Winter	Fall/Winter	0.424438	9.07081e-11
CGTTATTCGGATTTACTGGGCGTAAAGGGTGCGCAGGCGGCCAAGTGTGTCGGAGGTGAAATCTTGCAGCTTAACTGTAAAATTGCCTACGAAACTACTTGGCTAGAGTATCGGAGAGGATAGCGGAATTCCAGGTGTAGCAGTGAAATGCGTAGATATCTGGAGGAACACCAATGGCGAAGGCAGCTATCTGGACGATTACTGACGCTCAGGCACGAAAGCA	Fall/Winter	0.353014	1.88356e-08		Verrucomicrobia_5			Bacteria	Verrucomicrobia	PVC group	Opitutae	Puniceicoccales	Puniceicoccaceae	Coraliomargarita	Coraliomargarita akajimensis	Coraliomargarita akajimensis DSM 45221	Coraliomargarita akajimensis DSM 45221						Fall/Winter	Fall/Winter	0.457853	1.64e-08			Fall/Winter	Fall/Winter	0.336929	4.45599e-07
CGTTATCCGGATTTATTGGGTTTAAAGGGTCCGTAGGCGGATCATTAAGTCAGTGGTGAAAGCCGGCAGCTCAACTGTCGAACTGCCATTGATACTGATGATCTTGAATATTGTTGAAGTTGGCGGAATAGGTCATGTAGCGGTGAAATGCTTAGATATGACCTAGAACACCGATTGCGAAGGCAGCCAACTAAGCAGTTATTGACGCTGAGGGACGAAAGCG	Fall/Winter	0.35046	2.4205e-08		Bacteroidetes_518			Bacteria	Bacteroidetes	FCB group	Flavobacteriia	Flavobacteriales	Schleiferiaceae	Owenweeksia	Owenweeksia hongkongensis	Owenweeksia hongkongensis DSM 17368	Owenweeksia hongkongensis DSM 17368						Fall/Winter	Fall/Winter	0.478991	2.8e-09			Fall/Winter	Fall/Winter	0.364593	3.96225e-08
CGTTACTCGGAATCACTGGGCATAAAGGGCATGTAGGCGGCCCGACCAGTCAGATGTGAAATCCTTCGGCTCAACCGAAGAACTGCATTTGATACTGTCGGGCTCGAGGATGGTTGGGGTAAGCGGAACTCCTGGTGGAGCGGTGAAATGCGTAGATATCAGGAGGAACACCAGTGGCGAAAGCGGCTTACTGGACCATTACTGACGCTGAGGTGCGAAAGCT	Fall/Winter	0.346793	3.45639e-08		Planctomycetes_37			Bacteria	Planctomycetes	PVC group	Candidatus Brocadiae	Candidatus Brocadiales	Candidatus Brocadiaceae	Candidatus Kuenenia	Candidatus Kuenenia stuttgartiensis		Candidatus Kuenenia stuttgartiensis						Fall/Winter	Fall/Winter	0.240043	0.00457106			Fall/Winter	Fall/Winter2019	0.281599	2.91228e-05
CGTTATCCGGAATCATTGGGTTTAAAGGGTCCGTAGGTGGACTAATAAGTCAGAGGTGAAATCCCATAGCTTAACTATGGAACTGCCTTTGATACTGTTAGTCTTGAGTCATTTGGAAGTAGATAGAATGTGTAGTGTAGCGGTGAAATGCATAGATATTACACAGAATACCGATTGCGAAGGCAGTCTACTACGAATGTACTGACACTGATGGACGAAAGCG	Fall/Winter	0.341853	5.54549e-08		Bacteroidetes_1143			Bacteria	Bacteroidetes	FCB group	Flavobacteriia	Flavobacteriales	Flavobacteriaceae				Flavobacteriaceae						Fall/Winter	Fall/Winter	0.371549	7.23e-06			Fall/Winter	Fall/Winter	0.323933	1.28426e-06
CGTTATCCGGAATCACTGGGCATAAAGCGTCTGTAGGTTGTTTAATAAGTCTGCTGTTAAAGACTGGGGCTCAACCCCAGAAAAGCAGTGGAAACTGTTAGACTTGAGTGTGGTAGAGGTAGAGGGAATTCCTAGTGTAGCGGTGAAATGCGTAGATATTAGGAAGAACACCAATGGCGAAGGCACTCTACTGGGCCATAACTGACACTGAGAGACGACAGCT	Fall/Winter	0.340035	6.58529e-08		Cyanobacteria_154			Bacteria	Cyanobacteria	Cyanobacteria/Melainabacteria group		Chroococcales					Chroococcales						Fall/Winter	Fall/Winter	0.413235	4.72e-07			Fall/Winter	Fall/Winter	0.363824	4.25119e-08
CGTTATCCGGAATCACTGGGCATAAAGCGTCTGTAGGTGGTTTGGTAAGTCTGCTGTTAAAGACTGGGGCTCAACCCCAGAAAAGCAGTGGAAACTGCTAGACTTGAGTGTGGTAGAGGTAGAGGGAATTCCTAGTGTAGCGGTGAAATGCGTAGATATTAGGAAGAACACCAATGGCGAAGGCACTCTACTGGGCCATAACTGACACTGAGAGACGACAGCT	Fall/Winter	0.33687	8.8604e-08		Cyanobacteria_154			Bacteria	Cyanobacteria	Cyanobacteria/Melainabacteria group		Chroococcales					Chroococcales						Fall/Winter	Fall/Winter	0.429731	1.44e-07			Fall/Winter	NA	NA	NA
CGTTATCCGGATTTATTGGGTTTAAAGGGTCCGCAGGCGGACCAGTCAGTCAGTGGTGAAATCCCATCGCTCAACGATGGAACTGCCATTGATACTGCTGGTCTTGAGTCTAGTTGACGTAGGCGGAATATGACATGTAGCGGTGAAATGCATAGATATGTCATAGAACACCAATTGCGAAGGCAGCTTACGAAACTACGACTGACGCTCATGGACGAAAGCG	Fall/Winter	0.33241	1.33841e-07		Bacteroidetes_1149			Bacteria	Bacteroidetes	FCB group	Flavobacteriia	Flavobacteriales	Crocinitomicaceae	Fluviicola	Fluviicola taffensis	Fluviicola taffensis DSM 16823	Fluviicola taffensis DSM 16823						Fall/Winter	NA	NA	NA			Fall/Winter	Fall/Winter	0.354799	9.58434e-08
TGTTATCCGGAATCACTGGGCGTAAAGCGTCTGTAGGTGGTCAAATAAGTCAACTGTTAAATCTTGAGGCTCAACCTCAAAATCGCAGTCGAAACTATTAGACTAGAGTATAGTAGGGGTAAAGGGAATTTCCAGTGGAGCGGTGAAATGCGTAGAGATTGGAAAGAACACCGATGGCGAAGGCACTTTACTGGGCTATTACTAACACTCAGAGACGAAAGCT	Fall/Winter	0.330169	1.64253e-07		Cyanobacteria_151			Bacteria	Cyanobacteria	Cyanobacteria/Melainabacteria group		Chroococcales	Chroococcaceae	Geminocystis	Geminocystis sp. NIES-3709		Geminocystis sp. NIES-3709						Fall/Winter	NA	NA	NA			Fall/Winter	Fall/Winter	0.333187	6.07421e-07
TGTTATCCGGAATTATTGGGCGTAAAGCGTCTGTAGGTTGTTTAATAAGTCTATTGTTAAAGCTTGAAACTTAACTTCAGAGATGCAGTAGAAACTGTTAAACTAGAGTATAATTGAGGTAGAAGGAATTTCCAGTGGAGTGGTGAAATGCGTAGATATTGGAAAGAACACCAATTGCGAAGGCATTCTATTAAATTATTCTGACACTCAGAGACGAAAGCT	Fall/Winter	0.330087	1.65493e-07		Cyanobacteria_155			Bacteria	Cyanobacteria	Cyanobacteria/Melainabacteria group		Chroococcales					Chroococcales						Fall/Winter	NA	NA	NA			Fall/Winter	Fall/Winter	0.337141	4.37806e-07
TGTTATCCGGAATCACTGGGCGTAAAGCGTCTGTAGGTGGTTTAATAAGTCAACTGTTAAATCTTGAGGCTCAACTTCAAAATCGCAGTCGAAACTATTAGACTAGAGTATAGTAGGGGTAAAGGGAATTTCCAGTGGAGCGGTGAAATGCGTAGAGATTGGAAAGAACACCGATGGCGAAGGCACTTTACTGGGCTATTACTAACACTCAGAGACGAAAGCT	Fall/Winter	0.327484	2.09496e-07		Cyanobacteria_151			Bacteria	Cyanobacteria	Cyanobacteria/Melainabacteria group		Chroococcales	Chroococcaceae	Geminocystis	Geminocystis sp. NIES-3709		Geminocystis sp. NIES-3709						Fall/Winter	Winter/Spring	0.360813	1.38e-05			Fall/Winter	Fall/Winter	0.332861	6.23927e-07
CGTTAATCGGAATTACTGGGCGTAAAGCGTACGTAGGATGTAATGCAAGTCGGATGTGAAATCCCCGGGCTTAACCTGGGAACTGCATTCGAAACTACATTACTAGAGTGTAGTAGAGGTAAGCGGAATTTCGGGTGTAGCGGTGAAATGCGTAGATATCCGAAAGAACATCAGTGGCGAAGGCGGCTTACTGGACTAACACTGACTCTGAGGTACGAAAGCG	Fall/Winter	0.325368	2.53322e-07		Proteobacteria_2670			Bacteria	Proteobacteria								Proteobacteria						Fall/Winter	Fall/Winter	0.431478	1.27e-07			Fall/Winter	Fall/Winter	0.305515	5.30273e-06
TGTTATCCGGAATTACTGGGCGTAAAGCGTCTGTAGGTGGTTTAGTAAGTCGATTGTTAAATCTTGGGGCTTAACTTCAAAACAGCAATGGAAACTGCTAGACTTGAGTATGGTAGAGGTAAAAGGAATTTCCAGTGGAGCGGTGAAATGCGTAGATATTGGAAAGAACACCGATGGCGAAGGCATTTTACTGGGCCATAACTGACACTCAGAGACGAAAGCT	Fall/Winter	0.323191	3.07584e-07		Cyanobacteria_148			Bacteria	Cyanobacteria	Cyanobacteria/Melainabacteria group		Synechococcales					Synechococcales						Fall/Winter	NA	NA	NA			Fall/Winter	Fall/Winter	0.32277	1.40853e-06
CGTTACGCGGAATTACTGGGCTTAAAGCGTACGTAGGCGGGTCTACAGGTATCCTGTGAAAGCCCACGGCTCAACCGTGGAATTGCAGGGTAAACCGTAGATCTTGAGGTGGCTAGGGGCTCTCGGAACGATAGGTGGAGTGGTGAAATGCGTTGATATCTATCGGAACGCCAAAGGGGAAGCCAGGGAGCTGGGGCCATTCTGACGCTGAGGTACGAAAGCG	Fall/Winter	0.321605	3.5395e-07		Planctomycetes_35			Bacteria	Planctomycetes	PVC group	Phycisphaerae	Phycisphaerales	Phycisphaeraceae	Phycisphaera	Phycisphaera mikurensis	Phycisphaera mikurensis NBRC 102666	Phycisphaera mikurensis NBRC 102666						Fall/Winter	NA	NA	NA			Fall/Winter	Fall/Winter	0.283043	2.63902e-05
CGTTGCTCGGAATTACTGGGCGTAAAGCGAGCGTAGGCGGTTAGTCAAGTTGGTGGTGAAAGCCCGGAGCTCAACTCCGGAACTGCCATCAAAACTGACTTACTTGAGATTGGTAGAGGAAAATGGAATTCCTAGTGTAGAGGTGAAATTCGTAGATATTGGGAAGAACATCGGTGGCGAAGGCGATTTTCTGGGCCATATCTGACGCTGAGGTTCGAAAGCG	Fall/Winter	0.318099	4.81378e-07		Proteobacteria_5269			Bacteria	Proteobacteria		Alphaproteobacteria	Rhodospirillales	Rhodospirillaceae	Ferrovibrio	Ferrovibrio terrae		Ferrovibrio terrae						Fall/Winter	Fall/Winter	0.368564	8.67e-06			Fall/Winter	Fall/Winter	0.283344	2.5851e-05
TGTTACTCGGAATGATTAGGCGTAAAGGGTCCTTTAAGCGGTTTATCAAGTTAAAAGTTTTCCCATAAGGGCTCAACCTTTATGTACTTTTAATACTGTTAAACTAGAGTTTATCAGGGGATAGTAGAATTCACGGAGTAGGGGTAAAATCCAATAATCTCGTGAGGAACATCAGTGGCGAAGGCGACTATCTGGGATAATACTGACGCTGTAAGACGAAGGCA	Fall/Winter	0.311498	8.49852e-07		Proteobacteria_5170			Bacteria	Proteobacteria		Alphaproteobacteria	Rickettsiales	Anaplasmataceae	Wolbachia			Wolbachia						Fall/Winter	Fall/Winter	0.443992	4.91e-08			Fall/Winter	Fall/Winter	0.363035	4.56922e-08
TGTTATCCGGAATTATTGGGCGTAAAGCGTCTGCAGGTGGATAATTAAGTCTTATGTCAAATTTCTAGGCTCAACCTGGAGTCGGCAAAAGAAACTACTTATCTCGAGTATGGTAGAGGTAAAGGGAATTTCAAGTGGAGCGGTGAAATGCGTAGATATTTGAAAGAACTCCAATAGCGAAGGCACTTTACTGGGCCATTACTGACACTCAGAGACGAAAGCT	Fall/Winter	0.30921	1.03163e-06		Cyanobacteria_209			Bacteria	Cyanobacteria	Cyanobacteria/Melainabacteria group		Synechococcales	Prochlorotrichaceae	Halomicronema	Halomicronema hongdechloris	Halomicronema hongdechloris C2206	Halomicronema hongdechloris C2206						Fall/Winter	Winter/Spring	0.414515	4.32e-07			Fall/Winter	Fall/Winter	0.286008	2.15191e-05
CGTTATTCGGAATTACTGGGCTTAAAGGGTGCGTAGGCGGCTTGGCAAGTTGGGTGTGAAATCCCTCGGCTCAACCGAGGAACTGCGCTCAAAACTGCCAGGCTAGAGGAAGATAGAGGTGAGCGGAACTAATGGTGGAGCGGTGAAATGCGTTGATATCATTAGGAACACCTGTGGCGAAAGCGGCTCACTGGATCTTTTCTGACGCTGAGGCACGAAAGCT	Fall/Winter	0.309035	1.04694e-06		Planctomycetes_59			Bacteria	Planctomycetes	PVC group	Planctomycetia						Planctomycetia						Fall/Winter	Fall/Winter	0.252372	0.00282444			Fall/Winter	Fall/Winter	0.324163	1.26092e-06
CGTTGTCCGGATTTATTGGGCGTAAAGAGCTCGTAGGCGGTTCGGTAAGTCAGGTGTGAAAGCTCGAGGCTCAACCTCGAGATGCCACCTGATACTGCTGTGACTTGAGTCCGGTAGAGGAGTGTGGAATTCCTGGTGTAGCGGTGAAATGCGCAGATATCAGGAGGAACACCAATTGCGAAGGCAGCACTCTGGGCCGGTACTGACGCTGAGGAGCGAAAGCG	Fall/Winter	0.308066	1.13599e-06		Actinobacteria_173			Bacteria	Actinobacteria	Terrabacteria group	Acidimicrobiia	Acidimicrobiales	Acidimicrobiaceae	Acidimicrobium	Acidimicrobium ferrooxidans	Acidimicrobium ferrooxidans DSM 10331	Acidimicrobium ferrooxidans DSM 10331						Fall/Winter	Fall/Winter	0.309549	0.000220345			Fall/Winter	Fall/Winter	0.298551	8.84658e-06
TGTTATCCGGAATCACTGGGCGTAAAGCGTCTGTAGGTTGTTGTTTAAGTCAACTGTTAAATCTTGAGGCTCAACTTCAAAATCGCAGTCGAAACTATTCAACTAGAGTATAGTAGGGGTAAAGGGAATTTCCAGTGGAGCGGTGAAATGCGTAGATATTGGAAAGAACACCGATGGCGAAGGCACTTTACTGGGCTATTACTAACACTCAGAGACGAAAGCT	Fall/Winter	0.307506	1.19062e-06		Cyanobacteria_160			Bacteria	Cyanobacteria	Cyanobacteria/Melainabacteria group													Fall/Winter	Fall/Winter	0.254324	0.00261156			Fall/Winter	Fall/Winter	0.289346	1.70546e-05
CGTTATTCGGAATTATTGGGCGTAAAGCGTCTGTAGGTGGCTAAATAAGTCTGGTGTTAAATACTGAAGCTCAACTTCAGACCTGCATCAGAAACTATTTAGCTTGAGTACGTTAGAGGCAGGGGGAATTCCCAGTGTAGCGGTGAAATGCGTAGATATTGGGAGGAACACCAACGGCGAAGGCACCCTGCTGGGCCGATACTGACACTCAAGGACGAAAGCT	Fall/Winter	0.305293	1.43222e-06		Cyanobacteria_210			Bacteria	Cyanobacteria	Cyanobacteria/Melainabacteria group		Synechococcales	Acaryochloridaceae	Acaryochloris	Acaryochloris marina	Acaryochloris marina MBIC11017	Acaryochloris marina MBIC11017						Fall/Winter	Other	0.373291	6.5e-06			Fall/Winter	Fall/Winter	0.362867	4.63951e-08
CGTTGTTCGGAATTACTGGGCGTAAAGGGCGCGTAGGCGGCCCTATCAGTCAGGCGTGAAAGCCCCGGGCTCAACCTGGGATGTGCGTTTGATACTGTAGGGCTAGAGACCGGAAGAGGATGGCGGAATATCCAGTGTAGAGGTGAAATTCGTAGATATTGGATGGAACACCAGTGGCGAAGGCGGCCATCTGGTCCGGGTCTGACGCTGAGGCGCGAAAGCG	Fall/Winter	0.305183	1.44535e-06		Proteobacteria_5226			Bacteria	Proteobacteria		Alphaproteobacteria	Rhodospirillales	Rhodospirillaceae	Hypericibacter			Hypericibacter						Fall/Winter	Other	0.253378	0.0027128			Fall/Winter	Fall/Winter	0.308397	4.27397e-06
CGTTATCCGGATTTATTGGGTTTAAAGGGTCCGTAGGCGGGCAAATAAGTCAGTGGTGAAATCCTACAGCTCAACTGTAGAACTGCCATTGAAACTGTTAGTCTTGAATATAATTGAAGTGGGCGGAATGTGTCATGTAGCGGTGAAATGCTTAGATATGCCACAGAACACCGATTGCGAAGGCAGCTCACTAAGTTATCATTGACGCTGAGGGACGAAAGCG	Fall/Winter	0.304094	1.58208e-06		Bacteroidetes_1149			Bacteria	Bacteroidetes	FCB group	Flavobacteriia	Flavobacteriales	Crocinitomicaceae	Fluviicola	Fluviicola taffensis	Fluviicola taffensis DSM 16823	Fluviicola taffensis DSM 16823						Fall/Winter	Fall/Winter	0.591862	2.09e-14			Fall/Winter	Fall/Winter	0.257972	0.000135358
CGTTGTTCGGAATTACTGGGCGTAAAGCGCGCGTAGGCGGATTGGAAAGTTGGGGGTGAAATCCCGGGGCTCAACCCCGGAACTGCCTCCAAAACTGCCAGTCTAGAGTTCGAGAGAGGTGAGTGGAACTCCAAGTGTAGAGGTGAAATTCGTAGATATTTGGAAGAACACCAGTGGCGAAGGCGGCTCACTGGCTCGATACTGACGCTGAGGTGCGAAAGTG	Fall/Winter	0.303928	1.60391e-06		Proteobacteria_5951			Bacteria	Proteobacteria		Alphaproteobacteria	Rhodobacterales	Rhodobacteraceae	Salipiger	Salipiger profundus		Salipiger profundus						Fall/Winter	Spring	0.705916	4.09e-22			Fall/Winter	Fall/Winter	0.187062	0.0060561
CGTTAATCGGAATTACTGGGCGTAAAGCGCGCGTAGGCGGTTTGATAAGTGGGATGTGAAAGCCCCGGGCTCAACCTGGGAACTGCATTCCAAACTGTCAAACTAGAGTGTGGTAGAGGGAGGTAGAATTTCCTGTGTAGCGGTGAAATGCGTAGATATAGGAAGGAATACCGATGGCGAAGGCAGCCTCCTGGACCAACACTGACGCTGAGGTGCGAAAGCG	Fall/Winter	0.30279	1.76199e-06		Proteobacteria_2607			Bacteria	Proteobacteria		Gammaproteobacteria	Pseudomonadales	Pseudomonadaceae				Pseudomonadaceae						Fall/Winter	Fall/Winter	0.372078	7e-06			Fall/Winter	Fall/Winter	0.272951	5.19564e-05
CATTATTCGGAATTACTGGGCGTAAAGGGTCCGCAGGTGGTTTACTAAGTCAGATGTGAAATTTCAGTGCTTAACACTGAACCTGCATTTGAAACTGGTAGACTAGAGTATGTGAGAGGTAAGCGGAATTTGTGGTGTAGCGGTGGAATGCGTAGATATCACAAGGAAGACCAAAGGCGAAGGCAGCTTACTGGCACAATACTGACACTCATGGACGAAGGCT	Fall/Winter	0.300554	2.11669e-06		Proteobacteria_6696			Bacteria	Proteobacteria		Gammaproteobacteria	Thiotrichales	Francisellaceae				Francisellaceae						Fall/Winter	Fall/Winter	0.384583	3.21e-06			Fall/Winter	Fall/Winter	0.288643	1.79158e-05
CGTTAATCGGAATTACTGGGCGTAAAGCGCACGTAGGCGGACTAGTAAGTCAGATGTGAAATCTCCGGGCTCAACCCGGAAACTGCATTTGATACTGGTAGTCTAGAGTATGGTAGAGGGAGGTGGAATTTCCGGTGTAGCGGTGAAATGCGTAGATATCGGAAGGAATATCAGTGGCGAAGGCGACCTCCTGGGCCAATACTGACGCTGAGGTGCGAAAGCG	Fall/Winter	0.29956	2.29547e-06		Proteobacteria_6604			Bacteria	Proteobacteria								Proteobacteria						Fall/Winter	Fall/Winter	0.27334	0.0011794			Fall/Winter	Fall/Winter	0.307113	4.70645e-06
TGTTATTCGGAATGATTGGGCGTAAAGAGTCTGTAGGCGGTTTAGAAAGTCTTTTGTGAAATACTTCAGCTCAACTGAGGCTCCGCAAAAGAAACTTCTAGACTTGAGGAAAGTAGAGGTACAGGGAATTTCCGGTGGAGCGGTGAAATGCGTAGATATCGGAAGGAACACCAATATGGCGAAGGCACTGTACTGGGCTTTTCCTGACGCTCAGAGACGAAAGCT	Fall/Winter	0.296908	2.84553e-06		Planctomycetes_60			Bacteria	Planctomycetes	PVC group	Planctomycetia						Planctomycetia						Fall/Winter	Fall/Winter	0.269709	0.00137887			Fall/Winter	Fall/Winter	0.29185	1.42982e-05
CGTTGTTCGGATTCACTGGGCGTAAAGCGTGCGTAGGCGGAGAGATAAGTTTGGCGTGAAAGCCCCGGGCCTAACCCGGAAAATGCGCTGAAAACTATTTCCCTAGAGGATTGGAGAGGAGACTGGAATTCCTGGTGTAGCAGTGAAATGCGTAGATATCAGGAGGAACACCGGTGGCGAAGGCGAGTCTCTGGACAATTCCTGACGCTGAGGTACGAAGGCC	Fall/Winter	0.293727	3.67143e-06		Verrucomicrobia_12			Bacteria	Verrucomicrobia	PVC group							PVC group						Fall/Winter	NA	NA	NA			Fall/Winter	Fall/Winter	0.294925	1.14879e-05
CGTTACTCGGAATTACTGGGCGTAAAGCGAGCGCAGGCGGCTTATTAAGTCAGGTGTGAAAGCCCGGGGCTCAACCCCGGAACTGCATCTGAAACTGGTAAGCTAGAGGATGAGAGAGGAAAGTAGAATTTCTGGTGTAGAGGTGAAATTCGTTGATATCAGAAGGAATACCCGTGGCGAAGGCGGCTTTCTGGCTCATTTCTGACGCTGAGGCTCGAAAGTG	Fall/Winter	0.292153	4.16041e-06		Proteobacteria_4268			Bacteria	Proteobacteria		Deltaproteobacteria	Syntrophobacterales	Syntrophobacteraceae				Syntrophobacteraceae						Fall/Winter	NA	NA	NA			Fall/Winter	Fall/Winter	0.305559	5.28537e-06
CGTTAATCGGAATTACTGGGCGTAAAGCGCGCGTAGGTGGCTAAGTCAGCCAGGTGTGAAAGCCCCGGGCTCAACCTGGGAACGGCATCTGGAACTGCTTGGCTAGAGTGCAGGAGAGGAAGGTAGAATTCCCGGTGTAGCGGTGAAATGCGTAGAGATCGGGAGGAATACCAGTGGCGAAGGCGGCCTTCTGGACTGACACTGACACTGAGGTGCGAAAGCG	Fall/Winter	0.291392	4.41841e-06		Proteobacteria_6792			Bacteria	Proteobacteria		Gammaproteobacteria	Oceanospirillales	Halomonadaceae	Halomonas	Halomonas sp. SF2003		Halomonas sp. SF2003						Fall/Winter	NA	NA	NA			Fall/Winter	Fall/Winter2019	0.138229	0.0433861
CGTTACTCGGATTTACTGGGCGTAAAGGGTGCGCAGGCGGCCTGATATGTCAGATGTGAAAGCCCATGGCTCAACCATGGAACTGCATTTGAAACTATCAGGCTAGAGTATTGGAGAGGTAAGCGGAATTCCTAGTGTAGCGGTGAAATGCGTAGATATTAGGAGGAACACCAAAGGCGAAGGCAGCTTACTGGACAATTACTGACGCTCAGGCACGAAAGCA	Fall/Winter	0.287354	6.06209e-06		Verrucomicrobia_4			Bacteria	Verrucomicrobia	PVC group	Opitutae	Opitutales	Opitutaceae				Opitutaceae						Fall/Winter	Fall/Winter	0.236329	0.00526051			Fall/Winter	Winter/Spring	0.259379	0.000124011
CGTTAATCGGAATTACTGGGCGTAAAGCGCGTGTAGGTGGTTAATTAAGTCAGATGTGAAAGCCCAGGGCTCAACCCTGGAACTGCATTTGAAACTGGTTAACTAGAGTTTTGTAGAGGGTGGTAGAATTTCAGGTGTAGCGGTGAAATGCGTAGAGATCTGAAGGAATACCAGTGGCGAAGGCGGCCACCTGGACAATAACTGACGCTGAGGCGCGAAGGCG	Fall/Winter	0.286521	6.46686e-06		Proteobacteria_1413			Bacteria	Proteobacteria		Gammaproteobacteria	Alteromonadales	Psychromonadaceae	Psychromonas	Psychromonas sp. CNPT3		Psychromonas sp. CNPT3						Fall/Winter	Fall/Winter	0.307948	0.00023843			Fall/Winter	Fall/Winter	0.271753	5.62083e-05
GGTTATTCATGATGATTGGGTGTAAAGCAGGACAAGGCGATAAGTACAAGTTTTATCTTTACCAAAAGCTTCACTTGAGGAAAAATTTAAAAAACTAACTTAACAGAGGAATTATAGAGTTGAATGCGGAACTATCGGGGTAGAGGTGTAATTCGTTTCATCTCGATAGGAACACCAAAGGCGAAAAGCAGCCAACTACTAATTACCTGCCGCTCTACCTGTAATCT	Fall/Winter	0.284927	7.31467e-06		Fusobacteria_34			Bacteria	Fusobacteria		Fusobacteriia	Fusobacteriales	Leptotrichiaceae				Leptotrichiaceae						Fall/Winter	Fall/Winter	0.268098	0.00147683			Fall/Winter	Fall/Winter	0.270467	6.11355e-05
TGTTACTCGGAATGATTAGGCGTAAAGGGTCATTTAAGCGGTCCGATAAGTTAAAAGTCGATGGTTAGAGCCTAACTCTTTCATGCTTTTAATACTGTCAGACTAGAGTATATTAGAGGATAGTAGAATTCACAGAGGAGGGGTAAAATCCAGTAATTTTGTGAGGAACACCAAATGCGAAGGCAACTATCTGGAATATTACTGACGCTGGAAGACGAAGGCA	Fall/Winter	0.284599	7.50138e-06		Proteobacteria_3590			Bacteria	Proteobacteria		Betaproteobacteria			Candidatus Nasuia	Candidatus Nasuia deltocephalinicola		Candidatus Nasuia deltocephalinicola						Fall/Winter	Fall/Winter	0.340119	4.47e-05			Fall/Winter	Fall/Winter	0.308111	4.36696e-06
CGTTGTTCGGAATTACTGGGCGTAAAGGGAGCGCAGGCGGTTCATTCAGTTAGGCGTGAAAGCCCCGGGCTCAACCTGGGAACTGCGCTTAATACTGATGAACTAGAAATCAGAAGAGGATAGTGGAATTCCCAGTGTAGAGGTGAAATTCGTAGATATTGGGAAGAACACCGGTGGCGAAAGCGGCTATCTGGTCTGAATTTGACGCTGAGGCTCGAAAGCG	Fall/Winter	0.281914	9.21242e-06		Proteobacteria_6566			Bacteria	Proteobacteria	SAR116 cluster	Alphaproteobacteria			Candidatus Puniceispirillum	Candidatus Puniceispirillum marinum	Candidatus Puniceispirillum marinum IMCC1322	Candidatus Puniceispirillum marinum IMCC1322						Fall/Winter	Early-Summer	0.288126	0.000610522			Fall/Winter	Fall/Winter	0.264858	8.77735e-05
TGTTATCCGGAATTATTGGGCGTAAAGAGTCTGTAGGTGGTTTAGTAAGTCTGCTGTTAAAGCTCAAGGCTTAACCTTGAATCAGCAGTGGAAACTACTAGACTTGAGTGCGGTAGAGGTAAAGGGAATTTCCAGTGGAGCGGTGAAATGCGTAGATATTGGAAAGAACACCAATGGCGAAGGCACTTTACTGGGCCGTAACTGACACTCAGAGACGAAGGCT	Fall/Winter	0.279807	1.08086e-05		Cyanobacteria_209			Bacteria	Cyanobacteria	Cyanobacteria/Melainabacteria group		Synechococcales	Prochlorotrichaceae	Halomicronema	Halomicronema hongdechloris	Halomicronema hongdechloris C2206	Halomicronema hongdechloris C2206						Fall/Winter	NA	NA	NA			Fall/Winter	Fall/Winter	0.274039	4.83563e-05
CGTTATCCGGAATTATTGGGTTTAAAGGGTCCGCAGGCGGTTTTTTAAGTCAGAGGTGAAATCCTACAGCTCAACTGTAGAATTGCCTTTGATACTGAAAGACTTGAGTTATTGTGAAGTGGTTAGAATGTGTGGTGTAGCGGTGAAATGCATAGATATCACACAGAATACCGATTGCGAAGGCAGATCACTAACAATATACTGACGCTCATGGACGAAAGCG	Fall/Winter	0.279446	1.11067e-05		Bacteroidetes_975			Bacteria	Bacteroidetes	FCB group	Flavobacteriia	Flavobacteriales	Flavobacteriaceae	Kordia			Kordia						Fall/Winter	Fall/Winter	0.400458	1.13e-06			Fall/Winter	Fall/Winter	0.274534	4.68002e-05
CGTTGTTCGGAATTACTGGGCGTAAAGGGAGCGCAGGCGGTTCATTTAGTTAGGCGTGAAAGCCCCGGGCTCAACCTGGGAACTGCGCTTAATACTGATGAACTAGAATACAGAAGAGGATAGTGGAATTCCCAGTGTAGAGGTGAAATTCGTAGATATTGGGAAGAACACCGGTGGCGAAAGCGGCTATCTGGTCTGTAATTGACGCTGAGGCTCGAAAGCG	Fall/Winter	0.278936	1.15422e-05		Proteobacteria_5226			Bacteria	Proteobacteria		Alphaproteobacteria	Rhodospirillales	Rhodospirillaceae	Hypericibacter			Hypericibacter						Fall/Winter	Fall/Winter	0.268044	0.00148024			Fall/Winter	Fall/Winter	0.233517	0.000573622
TGTTATCCGGAATTATTGGGCGTAAAGCGTCTGCAGGTTGATGTAAAAGTCTTTTGTTAAATCTCAGAGCTCAACTCGGAATCTGCAAAGGAAACTATATGTCTAGAGTATGGTAGGGGTAGAGGGAATTTCTAGTGGAGCGGTGAAATGCGTAGATATTAGAAAGAACACCAAGAGCGAAGGCACTCTACTGGGCCAGTACTGACACTCAGAGACGAAAGCT	Fall/Winter	0.278406	1.20113e-05		Cyanobacteria_209			Bacteria	Cyanobacteria	Cyanobacteria/Melainabacteria group		Synechococcales	Prochlorotrichaceae	Halomicronema	Halomicronema hongdechloris	Halomicronema hongdechloris C2206	Halomicronema hongdechloris C2206						Fall/Winter	NA	NA	NA			Fall/Winter	Fall/Winter	0.300753	7.53531e-06
CATTGTTCGGAATCATTGGGCGTAAAGCGTATGTAGGCGGCTTGGCAAGTTGGTTGTGAAATCCCGGGGCTCAACCTCGGAATTGCAATCAAAACTGCTTCGCTAGAGTATAGTAGGGGATAGTGGAATTCCTAGTGTAGGGGTGAAATCCGTAGATATTAGGAGGAACATCGGCGGCGAAAGCGGCTATCTAGGCTATTACTGACGCTGAGATACGAAAGCG	Fall/Winter	0.276307	1.40534e-05		Proteobacteria_4399			Bacteria	Proteobacteria		Oligoflexia	Bdellovibrionales	Bdellovibrionaceae	Bdellovibrio			Bdellovibrio						Fall/Winter	Fall/Winter	0.296498	0.000413787			Fall/Winter	Fall/Winter	0.274897	4.56885e-05
CGTTATCCGGAATCATTGGGCGTAAAGCGCCTGTAGGTTGTTTAGTAAGTCTGTTGTTAAAGACCAGGGCTTAACCCTGGGAAAGCAATGGAAACTACTAGACTTGAGTATGGCAGGGGTAGAGGGAATTTCTAGTGTAGCGGTGAAATGCGTAGATATTAGAAAGAACACCGGCGGCGAAAGCGCTCTACTGGACCATTACTGACACTCAGAGGCGAAAGCT	Fall/Winter	0.274719	1.58122e-05		Cyanobacteria_148			Bacteria	Cyanobacteria	Cyanobacteria/Melainabacteria group		Synechococcales					Synechococcales						Fall/Winter	Winter/Spring	0.602109	5.65e-15			Fall/Winter	Winter/Spring	0.3498	1.4875e-07
TGTTATTCGGAATGATTGGGCGTAAAGAGTCTGTAGGCCGTATAGAAAGTCTTTTGTTAAATGCCTCGGCTCAACCGAGATCCAGCAAAGGAAACTTCTATACTTGAGGGAAGTAGAGGTACAGGGAATTCCCGGTGGAGCGGTGAAATGCGTAGATATCGGGAGGAACACCAATATGGCGAAGGCACTGTACTGGGCTTTTCCTGACGCTGAGAGACGAAAGCT	Fall/Winter	0.273402	1.74274e-05		Cyanobacteria_194			Bacteria	Cyanobacteria	Cyanobacteria/Melainabacteria group		Oscillatoriales	Oscillatoriaceae	Moorea	Moorea producens	Moorea producens PAL-8-15-08-1	Moorea producens PAL-8-15-08-1						Fall/Winter	Fall/Winter	0.20164	0.0177113			Fall/Winter	Fall/Winter	0.265702	8.31664e-05
CGTTGTTCGGAATTACTGGGCTTAAAGAGTACGTAGGCGGCATGATAAGTGATAGGTGAAATCCCACGGCTTACCCGTGGAACTGCCTAGCAAACTGTCAAGCTAGAGTGTGGTAGGGGAGAACAGAACTCATGGTGGAGCGGTGAAATGCGTAGATATCATGAGGAATACCGGTGGCGAAGGCGGTTCTCTGGTCCACAACTGACGCTGAGGTACGAAAGCT	Fall/Winter	0.271949	1.93901e-05		Planctomycetes_37			Bacteria	Planctomycetes	PVC group	Candidatus Brocadiae	Candidatus Brocadiales	Candidatus Brocadiaceae	Candidatus Kuenenia	Candidatus Kuenenia stuttgartiensis		Candidatus Kuenenia stuttgartiensis						Fall/Winter	Fall/Winter	0.231623	0.00626694			Fall/Winter	Fall/Winter	0.272258	5.43771e-05
CGTTATCCGGAATTATTGGGCGTAAAGAGTCCGTAGACGGTATTTGTTGTTGTTTGTTAAAGACTAGGTTTGTTACTTATTATAATGCATACAATACACTCATGCTAGAGTTTGATTGGGGATAACAGAATTTTATAATTAGGGGTAAAATCCTAAGAGTTATGAAGGAATGCCAGAGGCGAAGGCGGTTATCTAGGTCATTACTGACGTTCAGGGACGAAAGCG	Fall/Winter	0.270983	2.08089e-05		Proteobacteria_4980			Bacteria	Proteobacteria		Gammaproteobacteria	Alteromonadales	Alteromonadaceae	Glaciecola	Glaciecola amylolytica		Glaciecola amylolytica						Fall/Winter	Fall/Winter	0.291151	0.000531211			Fall/Winter	Fall/Winter	0.300702	7.56359e-06
CGTTATCCGGAATCATTGGGCGTAAAGCGTCCGCAGGTGGTTTCCAAAGTCTGCTGTTAAAGACTGGAGCTCAACTCCGGAACGGCGGTGGAAACTTGGAAACTAGAGTTCGGTAGGGGTAGCAGGAATTCCCAGTGTAGCGGTGAAATGCGTAGATATTGGGAAGAACATCGGTGGCGAAGGCGTGCTACTGGACCGTAACTGACACTCAGGGACGAAAGCT	Fall/Winter	0.26997	2.24012e-05		Cyanobacteria_181			Bacteria	Cyanobacteria	Cyanobacteria/Melainabacteria group		Chroococcales	Aphanothecaceae	Candidatus Atelocyanobacterium	Candidatus Atelocyanobacterium thalassa		Candidatus Atelocyanobacterium thalassa						Fall/Winter	Fall/Winter	0.361952	1.29e-05			Fall/Winter	Fall/Winter	0.270294	6.18296e-05
CGTTATCCGGAATCATTGGGTTTAAAGGGTCCGTAGGCGGTTTTTTAAGTCAGAGGTGAAATCCTGCAGCTCAACTGTAGAATTGCCTTTGATACTGAAAGACTTGAGTTATTGTGAAGTGGTTAGAATGTGTGGTGTAGCGGTGAAATGCATAGATATCACACAGAATACCAATTGCGAAGGCAGATCACTAACAATATACTGACGCTCAGGGACGAAAGCG	Fall/Winter	0.269149	2.3776e-05		Bacteroidetes_975			Bacteria	Bacteroidetes	FCB group	Flavobacteriia	Flavobacteriales	Flavobacteriaceae	Kordia			Kordia						Fall/Winter	Fall/Winter	0.389911	2.28e-06			Fall/Winter	Fall/Winter	0.258713	0.000129269
CGTTATCCGGAATCATTGGGTTTAAAGGGTCCGTAGGTGGTTTATTAAGTCAGAGGTGAAATCCTATCGCTCAACGATAGAACTGCCTTTGATACTGATAGACTTGAGTTATTGTGAAGTGGTTAGAATGTGTAGTGTAGCGGTGAAATGCATAGATATTACACAGAATACCGATTGCGAAGGCAGATCACTAACAATATACTGACACTGAGGGACGAAAGCG	Fall/Winter	0.267952	2.59232e-05		Bacteroidetes_980			Bacteria	Bacteroidetes	FCB group	Flavobacteriia	Flavobacteriales	Flavobacteriaceae	Winogradskyella	Winogradskyella sp. J14-2		Winogradskyella sp. J14-2						Fall/Winter	Fall/Winter	0.312628	0.000189094			Fall/Winter	Fall/Winter	0.263355	9.65749e-05
CGTTAATCGGAATTACTGGGCGTAAAGCGCGCGTAGGTGGTTTGATAAGCTAGCTGTGAAAGCCCCGGGCTCAACCTGGGAACTGCAGTTAGAACTGTCTGACTAGAGTATAGTAGAGGGTGGCGGAATTTCCTGTGTAGCGGTGAAATGCGTAGATATAGGAAGGAACATCAGTGGCGAAGGCGGCCACCTGGACTAATACTGACACTGAGGTGCGAAAGCG	Fall/Winter	0.262741	3.75995e-05		Proteobacteria_1628			Bacteria	Proteobacteria		Gammaproteobacteria	Alteromonadales	Alteromonadaceae				Alteromonadaceae						Fall/Winter	NA	NA	NA			Fall/Winter	Fall/Winter	0.258926	0.000127559
CGTTGCTCGGAATTACTGGGCGTAAAGCGCGCGTAGGCGGCGAATCCAGTCAGGCGTGAAAGCCCAGGGCTTAACCCTGGAACTGCGCTTGATACTGATTTGCTAGAATTCGAGAGAGGGTAGTGGAATTTCCAGTGTAGAGGTGAAATTCGTAGATATTGGAAAGAACACCGGTGGCGAAGGCGGCTATCTGGCTCGATATTGACGCTGAGGTGCGAAAGCG	Fall/Winter	0.261549	4.08928e-05		Proteobacteria_6456			Bacteria	Proteobacteria		Alphaproteobacteria						Alphaproteobacteria						Fall/Winter	NA	NA	NA			Fall/Winter	Fall/Winter	0.231388	0.000646054
CGTTGTTCGGAATCACTGGGCGTAAAGGGTCCGTAGGCGGAAAATCAAGTCAGGTGTTTAAGACCGGAGCCTAACTCCGGCTAGGTGCTTGAAACTGATTTTCTTGAATAGGTCAGAGGTAAGTGGAATACTTAGTGTAGCGGTGGAATGCGTAGAGATTAAGTAGAACACCAATTGCGAAGGCAGCTTACTGGGGCCATATTGACGCTGATGGACGAAAGTG	Fall/Winter	0.261222	4.18405e-05		phylum_reps_751																		Fall/Winter	NA	NA	NA			Fall/Winter	Fall/Winter	0.258957	0.000127319
TGTTATCCGGAATCACTGGGCGTAAAGCGTCTGTAGGTGGTCAAATAAGTCAACTGTTAAATCTTGAGGCTCAACCTCAAACCTGCAGTCGAAACTATTAGACTAGAGTATAGTAGGGGTAAAGGGAATTTCCAGTGGAGCGGTGAAATGCGTAGAGATTGGAAAGAACACCGATGGCGAAGGCACTTTACTGGGCTATTACTAACACTCAGAGACGAAAGCT	Fall/Winter	0.260982	4.25525e-05		Cyanobacteria_151			Bacteria	Cyanobacteria	Cyanobacteria/Melainabacteria group		Chroococcales	Chroococcaceae	Geminocystis	Geminocystis sp. NIES-3709		Geminocystis sp. NIES-3709						Fall/Winter	Winter/Spring	0.237888	0.00496053			Fall/Winter	Fall/Winter	0.270711	6.0171e-05
TGGTCGTCGCTTTTATTGGGCCTAAAACGTCCGTAGCCTGTTTGGTAAATCTGTGGGTAAATCAACTCGCTCAACGAGTTGAATTCTGCAGAGACTGCCAGACTAGGGACCGGGAGAGGTGTGGGGTACTCGAGGGGTAGGGGTAAAATCCTGTCATCCTTCGAGGACCACCAGTTGCGAAGGCGCCACACTGGAACGGATCCGACGGTCAGGGACGAAGCCT	Fall/Winter	0.259743	4.64035e-05		archaea_4			Archaea	Euryarchaeota	Diaforarchaea group	Thermoplasmata	Methanomassiliicoccales					Methanomassiliicoccales						Fall/Winter	NA	NA	NA			Fall/Winter	Fall/Winter	0.252883	0.000185021
CGTTGTTCGGATTCACTGGGCGTAAAGCGTGCGTAGGCGGAGAAATAAGTTTGGCGTGAAAGCCCCGGGCCTAACCCGGAAAATGCGCTGAAAACTATTTCCCTAGAGGATTGGAGAGGAGACTGGAATTCCTGGTGTAGCAGTGAAATGCGTAGATATCAGGAGGAACACCGGTGGCGAAGGCGAGTCTCTGGACAATTCCTGACGCTGAGGTACGAAGGCC	Fall/Winter	0.259311	4.7822e-05		Verrucomicrobia_12			Bacteria	Verrucomicrobia	PVC group							PVC group						Fall/Winter	Other	0.242665	0.00413431			Fall/Winter	Fall/Winter	0.265756	8.28823e-05
CGTTATCCGGAATCATTGGGTTTAAAGGGTCCGCAGGCGGACGTATAAGTCAGTGGTGAAATCCTGCAGCTTAACTGCAGAACTGCCATTGATACTGTACGTCTTGAATTCGGTCGAAGTGGGCGGAATGTGTAGTGTAGCGGTGAAATGCATAGATATTACACAGAACACCGATAGCGAAGGCAGCTCACTAGGCCTGGATTGACGCTCAGGGACGAAAGCG	Fall/Winter	0.256913	5.64698e-05		Bacteroidetes_1149			Bacteria	Bacteroidetes	FCB group	Flavobacteriia	Flavobacteriales	Crocinitomicaceae	Fluviicola	Fluviicola taffensis	Fluviicola taffensis DSM 16823	Fluviicola taffensis DSM 16823						Fall/Winter	Fall/Winter	0.315503	0.000163671			Fall/Winter	Fall/Winter	0.282931	2.65926e-05
TGTTATCCGGAATTATTGGGCGTAAAGCGTCTGCAGGTTGTTTTATAAGTCTATTGTTAAAGGTCGAAGCTTAACTTCGAAAATGCGGTAGAAACTGTTTAACTAGAGTATGGTCGAAGTAGAAGGAATTTCCAGTGGAGTGGTGAAATGCGTAGATATTGGAAAGAACACCGATGGCGAAAGCATTCTATTAGGGCATTACTGACACTCAGAGACGAAAGCT	Fall/Winter	0.256186	5.93687e-05		Cyanobacteria_160			Bacteria	Cyanobacteria	Cyanobacteria/Melainabacteria group													Fall/Winter	NA	NA	NA			Fall/Winter	Fall/Winter	0.247655	0.000253375
CGTTATCCGGATTTATTGGGTTTAAAGGGTCCGCAGGCGGGATTCTAAGTCAGTGGTGAAAGCCTACAGCTCAACTGTAGAACTGCCATTGATACTGGAATTCTTGAGTGTGGTTGAAGTAGACGGAATATGTCATGTAGCGGTGAAATGCATAGATATGACATAGAACACCAATTGCGTAGGCAGTTTACTAAACCATTACTGACGCTCATGGACGAAAGTG	Fall/Winter	0.255684	6.14511e-05		Bacteroidetes_518			Bacteria	Bacteroidetes	FCB group	Flavobacteriia	Flavobacteriales	Schleiferiaceae	Owenweeksia	Owenweeksia hongkongensis	Owenweeksia hongkongensis DSM 17368	Owenweeksia hongkongensis DSM 17368						Fall/Winter	Fall/Winter	0.291542	0.000521663			Fall/Winter	Fall/Winter	0.242628	0.000340671
TGTTATTCGGAGTGATTAGGCGTAAAGGGTCCTTTAAGCGGATTGATCAGTTGGAGCAAAAAATAAAAGAGCTTAACTCTTTTGATTCTCCAATACTGTCATTCTTGAGTTTATCAGAGTTTAGTAGAACTTACGGAGTAGGGATAAAATCCATTAATATCGTAGGGAACACCGGTGGCGAAGGCGACTATTCATGATAAGACTGACGCTGTAAGACGAAGGCG	Fall/Winter	0.254342	6.73621e-05		Proteobacteria_3590			Bacteria	Proteobacteria		Betaproteobacteria			Candidatus Nasuia	Candidatus Nasuia deltocephalinicola		Candidatus Nasuia deltocephalinicola						Fall/Winter	Fall/Winter	0.335515	5.75e-05			Fall/Winter	Fall/Winter	0.25603	0.000152617
CGTTGTTCGGAATTACTGGGCGTAAAGCGCACGTAGGCGGTCTATCTAGTTAGAGGTGAAAGGCCCGGGCTCAACCTGGGAACTGCCTTTAATACTGGTAGGCTAGAGTCCGGGAGAGGGTAGCGGAATTCCAAGTGTAGAGGTGAAATTCGTAGATATTTGGAAGAACACCGGTGGCGAAGGCGGCTACCTGGACCGGCACTGACGCTGAGGTGCGAAAGCG	Fall/Winter	0.253663	7.05509e-05		Proteobacteria_6452			Bacteria	Proteobacteria		Alphaproteobacteria						Alphaproteobacteria						Fall/Winter	Fall/Winter	0.196998	0.0205642			Fall/Winter	Fall/Winter	0.250794	0.000209956
CGTTATCCGGATTTATTGGGCATAAAGGGCAAGTAGGTTGTTTTTTAAGTCAGGTGTAAAATCCTACAGCTCAACTGTAGATCGCCCCTGAAACTGAAAAACTAGAGGTCAGTAGAGGAAAGCGGAACTCACAGTGTAGCGGTGAAATGCGTAGATATTGTGAGGAACACCAGTTGCGAAGGCGGCTTTCTGGACTGATCCTGACACTGAGGTGCGAAAGCG	Fall/Winter	0.252158	7.81405e-05		Firmicutes_Tenericutes_3876			Bacteria	Firmicutes	Terrabacteria group	Clostridia	Thermoanaerobacterales	Thermodesulfobiaceae	Thermodesulfobium			Thermodesulfobium						Fall/Winter	NA	NA	NA			Fall/Winter	Fall/Winter	0.244209	0.000310591
CATTATTCAACATTACTGGGCGTAAAGCGTTCGTAGATTCTAACAAATTGCTACAAGTAAAAGATTACAGAGAAACTGTTTTGATACTTTTTTTTCATGGTTAGAAGAGTAGGAGAGGGAACAGTAGAATTCTACAAGAAGAGGTGAAATTTCGATAGATGTAGAGGACTACCAGAGGTGAAGACGACTGTTTGTATCCTAACTATCATTGAGGAACGAAAGCA	Fall/Winter	0.250596	8.68169e-05		Proteobacteria_6887			Bacteria	Proteobacteria		Gammaproteobacteria	Oceanospirillales	Halomonadaceae	Candidatus Carsonella	Candidatus Carsonella ruddii		Candidatus Carsonella ruddii						Fall/Winter	Fall/Winter	0.317397	0.000148709			Fall/Winter	Fall/Winter	0.296768	1.00633e-05
CGTTGTTCGGATTGACTGGGCGTAAAGAGCACGTAGGCGGATTCATAAGTCGAATGTGAAAGCCCAGGGCTTAACCCTGGAACTGCATTCGAAACTGTGGATCTTGAATGTTTGAGAGGTTGGCGGAATTCCAGGTGTAGGAGTGAAATCCGTAGATATCTGGAGGAACACCGGAGGCGAAGGCGGCTAACTGGCAAAACATTGACGCTGAGGTGCGAAAGCG	Fall/Winter	0.243738	0.000136771		Proteobacteria_4399			Bacteria	Proteobacteria		Oligoflexia	Bdellovibrionales	Bdellovibrionaceae	Bdellovibrio			Bdellovibrio						Fall/Winter	Fall/Winter	0.239444	0.00467655			Fall/Winter	Fall/Winter	0.229003	0.000737168
TGTTATCCGGAATCACTGGGCGTAAAGCGTCTGTAGGTGGTTTAATAAGTCAACTGTTAAATCTTGGGGCTTAACCTCAAAATCGCAGTCGAAACTATTAGACTAGAGTATAGTAGGGGTAAAGGGAATTTCCAGTGGAGCGGTGAAATGCGTAGAGATTGGAAAGAACACCGATGGCGAAGGCACTTTACTGGGCTATTACTAACACTCAGAGACGAAAGCT	Fall/Winter	0.241715	0.000156005		Cyanobacteria_154			Bacteria	Cyanobacteria	Cyanobacteria/Melainabacteria group		Chroococcales					Chroococcales						Fall/Winter	Winter/Spring	0.370196	7.86e-06			Fall/Winter	NA	NA	NA
CGTTATCCGGAATTATTGGGCGTAAAGAGTCCGTAGGTTGTTATCAAAGCCTATTGTTAAATATTAAGGCTTCACCTTGAATCTGCAGTAGGAACCTGATAACTTGAGTGCGGTAGGAGTAGGGGGAATTCCCGGTGTAGCGGTGAAATGCGTAGATATCGGGAAGAACACCGGAGGCGAAAGCGCCCTACTAGGCCGACACTGACACTAAGGGACGAAAGCT	Fall/Winter	0.241198	0.000161317		Cyanobacteria_196			Bacteria	Cyanobacteria	Cyanobacteria/Melainabacteria group													Fall/Winter	Fall/Winter	0.272832	0.00120561			Fall/Winter	Fall/Winter	0.204094	0.00270165
TGTTATCCGGAATCACTGGGCGTAAAGCGTCTGTAGGTGGTTTAGTAAGTCTATTGTTAAATCTTGAGGCTCAACTTCAAATCAGCGATGGAAACTGCTAGACTAGAGTGTGGTAGAGGTAAGAGGAATTTCCAGTGGAGCGGTGAAATGCGTAGATATTGGAAAGAACACCGATGGCGAAGGCATCTTACTGGGCCATAACTGACACTCAGAGACGAAAGCT	Fall/Winter	0.241053	0.000162839		Cyanobacteria_210			Bacteria	Cyanobacteria	Cyanobacteria/Melainabacteria group		Synechococcales	Acaryochloridaceae	Acaryochloris	Acaryochloris marina	Acaryochloris marina MBIC11017	Acaryochloris marina MBIC11017						Fall/Winter	NA	NA	NA			Fall/Winter	Fall/Winter	0.229614	0.000712752
CGTTGTTCGGAATTACTGGGCGTAAAGCGCGCGTAGGCGGTTAGTCTAGTCAGGCGTGAAATCCCGGGGCTCAACCCCGGAACTGCGCTTGATACTGGCTTACTAGAGGTCTGGAGAGGGTAGCGGAATTCCCAGTGTAGAGGTGAAATTCGTAGATATTGGGAAGAACACCAGCGGCGAAGGCGGCTACCTGGACAGATACTGACGCTGAGGTGCGAAAGCG	Fall/Winter	0.239996	0.000174313		Proteobacteria_6456			Bacteria	Proteobacteria		Alphaproteobacteria						Alphaproteobacteria						Fall/Winter	Fall/Winter	0.262485	0.00186974			Fall/Winter	Fall/Winter	0.208436	0.00217649
CGTTGTTCGGAATTACTGGGCGTAAAGCGCACGTAGGCGGATTAGTCAGTCAGGGGTGAAATCCCGAGGCTCAACCTCGGAACTGCCTTTGATACTGCTAGTCTAGAGTTCGAGAGAGGTGAGTGGAATTCCGAGTGTAGAGGTGAAATTCGTAGATATTCGGAGGAACACCAGTGGCGAAGGCGGCTCACTGGCTCGATACTGACGCTGAGGTGCGAAAGCG	Fall/Winter	0.2393	0.000182278		Proteobacteria_6066			Bacteria	Proteobacteria		Alphaproteobacteria	Rhodobacterales	Rhodobacteraceae				Rhodobacteraceae						Fall/Winter	Fall/Winter	0.316446	0.000156059			Fall/Winter	Fall/Winter	0.238809	0.000424862
CGTTATCCGGAATCATTGGGCGTAAAGCGCCTGTAGGTTGTTTAACAAGTCTGCTGTTAAAGACTAGGGCTTAACCCTGGGAAAGCAGTGGAAACTAGTAAACTTGAGTATGGTAGGGGTAGAGGGAATTTCTAGTGTAGCGGTGAAATGCGTAGATATTAGAAAGAACACCGGTGGCGAAAGCGCTCTACTGGGCCATTACTGACACTCAGAGGCGAAAGCT	Fall/Winter	0.236045	0.000224278		Cyanobacteria_135			Bacteria	Cyanobacteria	Cyanobacteria/Melainabacteria group													Fall/Winter	NA	NA	NA			Fall/Winter	Fall/Winter	0.249801	0.000222875
CGTTGTTCGGAATCACTGGGCGTAAAGCGCGTGTAGGCGGTTTTTTAAGTCGGATGTGAAATCCCTCGGCTCAACCGAGGACGTGCATCCGATACTGGAGAACTAGAGTACCGGAGGGGATGGTGGAATTCCTGGTGTAGAGGTGAAATTCGTAGATATCAGGAGGAACATCAGTGGCGAAGGCGACCATCTGGAAGGTAACTGACGCTGAGACGCGAAAGCG	Fall/Winter	0.2354	0.000233596		Proteobacteria_4368			Bacteria	Proteobacteria		Deltaproteobacteria	Myxococcales					Myxococcales						Fall/Winter	Fall/Winter	0.195458	0.0215942			Fall/Winter	Fall/Winter	0.241449	0.000364855
CGTTATTCGGAATTACTGGGCGTAAAGCGAGCGTAGGCGGATTTGTAAGTTGGAGGTGAAATCCCAGAGCTTAACTCTGGAACTGCCTTCAAAACTACATTTCTTGAGTTTGGTAGAGGAGAGTGGAATTCCTAGTGTAGAGGTGAAATTCGTAGATATTAGGAGGAACACCAGTGGCGAAGGCGACTCTCTGGGCCAATACTGACGCTGAGGTTCGAAAGCG	Fall/Winter	0.230525	0.000316675		Proteobacteria_6102			Bacteria	Proteobacteria		Alphaproteobacteria	Caulobacterales	Caulobacteraceae	Terricaulis	Terricaulis silvestris		Terricaulis silvestris						Fall/Winter	Fall/Winter	0.575906	1.47e-13			Fall/Winter	Fall/Winter	0.161151	0.0183211
CGTTATCCGGAATCATTGGGTTTAAAGGGTCCGCAGGCGGTCAATTAAGTCAGAGGTGAAATCCCATAGCTTAACTATGGAACTGCCTTTGATACTGGTTGACTTGAGTCATATGGAAGTAGATAGAATGTGTAGTGTAGCGGTGAAATGCATAGATATTACACAGAATACCGATTGCGAAGGCAGTCTACTACGTATGTACTGACGCTGAGGGACGAAAGCG	Fall/Winter	0.228833	0.00035143		Bacteroidetes_1123			Bacteria	Bacteroidetes	FCB group	Flavobacteriia	Flavobacteriales	Flavobacteriaceae	Polaribacter	Polaribacter sp. ALD11		Polaribacter sp. ALD11						Fall/Winter	Other	0.378613	4.67e-06			Fall/Winter	Fall/Winter	0.245315	0.000291043
CGTTATCCGGAATCATTGGGTTTAAAGGGTCCGCAGGCTGTTTTTTAAGTCAGAGGTGAAATCCTACAGCTCAACTGTAGAACTGCCTTTGATACTGGAAAACTTGAGTTATTGTGAAGTGGTTAGAATGTGTGGTGTAGCGGTGAAATGCATAGATATCACACAGAATACCGATTGCGAAGGCAGATCACTAACAATATACTGACGCTCATGGACGAAAGCG	Fall/Winter	0.226534	0.000404363		Bacteroidetes_975			Bacteria	Bacteroidetes	FCB group	Flavobacteriia	Flavobacteriales	Flavobacteriaceae	Kordia			Kordia						Fall/Winter	Fall/Winter	0.342573	3.91e-05			Fall/Winter	Fall/Winter	0.192973	0.00461
TAATAATCATATATTGGGCTTAAAACGTGGGCAGCTTAACTAACAAAGGTGCTTGTAAAATTTTAACAAACATTAAAAAGGCAAGTAAAACTATTAGTTTAGAGAATGGGAGAAGTACAAAGTACAATAAAAGTAGCGGTCAAATGTGATGATATTTATTGAACTATCAATGGTGAAGACATTGTACTAGAACATGTCTGACAGTAAACCACGAAAGCC	Fall/Winter	0.224705	0.000451635		archaea_294			Archaea	Euryarchaeota	Stenosarchaea group	Halobacteria	Natrialbales	Natrialbaceae	Salinadaptatus	Salinadaptatus halalkaliphilus		Salinadaptatus halalkaliphilus						Fall/Winter	NA	NA	NA			Fall/Winter	Fall/Winter	0.263975	9.28482e-05
CGTTAATCGGAATTACTGGGCGTAAAGCGCGCGTAGGCGGTTTGGTCAGTTGGATGTGAAAGCCCCGGGCTTAACCTGGGAACTGCATTCAATACTGCCAGACTAGAGTACGAGAGAGGGGGGTAGAATTTCTAGTGTAGCGGTGAAATGCGTAGATATTAGAAGGAATACCAGTGGCGAAGGCGGCCCCCTGGCTCGATACTGACGCTGAGGTGCGAAAGCG	Fall/Winter	0.22118	0.000557546		Proteobacteria_1591			Bacteria	Proteobacteria		Gammaproteobacteria	Cellvibrionales	Halieaceae				Halieaceae						Fall/Winter	Fall/Winter	0.385142	3.09e-06			Fall/Winter	Fall/Winter	0.192832	0.00464041
CGTTGTTCGGAATTACTGGGCGTAAAGAGCGCGTAGGCGGTTTGTTAAGTTGGAAGTGAAATCCCGGAGCTCAACTCCGGAACTGCTTTCAAAACTGGCTTACTAGAGTTAGGTAGAGGATAGTGGAATTCCCAATGTAGAGGTGAAATTCGTAGATATTGGGAGGAACACCAGAAGCGAAGGCGACTATCTGGGCCTTAACTGACGCTGAGGCGCGAAAGTG	Fall/Winter	0.220427	0.000582968		Proteobacteria_5202			Bacteria	Proteobacteria		Alphaproteobacteria	Rickettsiales	Anaplasmataceae				Anaplasmataceae						Fall/Winter	NA	NA	NA			Fall/Winter	Fall/Winter	0.206579	0.00238846
CGTTAATCGGAATTACTGGGCGTAAAGCGCGTGTAGGTGGTTAATTAAGTCAGATGTGAAAGCCCAGGGCTCAACCCTGGAACTGCATTTGAAACTGGTTAACTAGAGTTTTGTAGAGGGTGGTAGAATTTCAGGTGTAGCGGTGAAATGCGTAGAGATCTGAAGGAATACCAGTGGCGAAGGCGGCCACCTGGACAAAGACTGACGCTGAGGCGCGAAGGCG	Fall/Winter	0.21757	0.000689462		Proteobacteria_1413			Bacteria	Proteobacteria		Gammaproteobacteria	Alteromonadales	Psychromonadaceae	Psychromonas	Psychromonas sp. CNPT3		Psychromonas sp. CNPT3						Fall/Winter	Fall/Winter	0.305208	0.000272623			Fall/Winter	Fall/Winter	0.207388	0.00229394
CGTTGTTCGGAATAACTGGGCGTAAAGGGTACGTAGGCGGTTTTGTAAGTTAGATGTGAAATCCCAGGGCTCAACCTTGGAACTGCATTTAAAACTGCAAAACTTGAGATCGGAAGAGGAAGGCGGAATTTCTAGTGTAGAGGTGAAATTCGTAGATATTAGAAGGAACATCAGAGGCGAAGGCGGCTTTCTGGTCCGATACTGACGCTGAGGTACGAAAGCG	Fall/Winter	0.217204	0.000704336		Proteobacteria_5202			Bacteria	Proteobacteria		Alphaproteobacteria	Rickettsiales	Anaplasmataceae				Anaplasmataceae						Fall/Winter	NA	NA	NA			Fall/Winter	Fall/Winter	0.217894	0.00133907
CGTTAATCGGAATTACTGGGCGTAAAGCGCGCGTAGGCGGACTATTAAGTCAGATGTGAAATCTTTGGGCTCAACCCAAAAACTGCATTTGATACTGGTAGCCTAGAGTATGGTAGAGGGAGGTGGAATTTCCGGTGTAGCGGTGAAATGCGTAGATATCGGAAGGAATATCAGTGGCGAAGGCGACCTCCTGGGCCAATACTGACGCTGAGGTGCGAAAGCG	Fall/Winter	0.21681	0.00072071		Proteobacteria_6604			Bacteria	Proteobacteria								Proteobacteria						Fall/Winter	NA	NA	NA			Fall/Winter	Fall/Winter	0.212259	0.00179293
CGTTGTCCGGATTTATTGGGCGTAAAGGGCTCGTAGGTGGGCTAGTAAGTCAAAATTGAAATCCAATGGCTTAACCATTGTCACGGTTTTGATACTGCTAGTCTTGAGTGAAATAGAGGTAAGTGGAATTCCTGGTGTAGCGGTGAAATGCGTAGATATCAGGAGGAACGCCGAAGGAGAAGTCAGCTTACTGGATTTATACTGACACTGAGGAGCGAAAGCG	Fall/Winter	0.216681	0.000726128		Firmicutes_Tenericutes_3734			Bacteria	Firmicutes	Terrabacteria group	Tissierellia	Tissierellales	Peptoniphilaceae	Peptoniphilus			Peptoniphilus						Fall/Winter	NA	NA	NA			Fall/Winter	Fall/Winter	0.204999	0.00258353
TGTTATCCGGAATCACTGGGCGTAAAGCGTCTGTAGGTGGTTTAATAAGTCAACTGTAAAATCTTGAGGCTCAACCTCAAAACCGCAGTCGAAACTATTAGACTAGAGTATAGTAGGGGTAAAGGGAATTTCCAGTGGAGCGGTGAAATGCGTAGAGATTGGAAAGAACACCGATGGCGAAGGCACTTTACTGGGCTATTACTAACACTCAGAGACGAAAGCT	Fall/Winter	0.21338	0.000878477		Cyanobacteria_151			Bacteria	Cyanobacteria	Cyanobacteria/Melainabacteria group		Chroococcales	Chroococcaceae	Geminocystis	Geminocystis sp. NIES-3709		Geminocystis sp. NIES-3709						Fall/Winter	NA	NA	NA			Fall/Winter	Fall/Winter	0.199747	0.00334016
CGTTGTTCGGAATTACTGGGCGTAAAGCGCACGTAGGCGGATTGGAAAGTAGGGGGTGAAATCCCAGGGCTCAACCCTGGAACTGCCTCCTAAACTATCAGTCTAGAGTTCGAGAGAGGTGAGTGGAATTCCAAGTGTAGAGGTGAAATTCGTAGATATTTGGAGGAACACCAGTGGCGAAGGCGGCTCACTGGCTCGATACTGACGCTGAGGTGCGAAAGCG	Fall/Winter	0.212758	0.000910279		Proteobacteria_5983			Bacteria	Proteobacteria		Alphaproteobacteria	Rhodobacterales	Rhodobacteraceae				Rhodobacteraceae						Fall/Winter	Other	0.459968	1.38e-08			Fall/Winter	NA	NA	NA
TGTTATCCGGAATCACTGGGCGTAAAGCGTCTGTAGGTGGTTTAATAAGTCAACTGTTAAATCTTGAGGCTCAACTTCAAAATCGCAGTCGAAACTATTAGACTAGAGTATAGTAGGGGTAAAGGGAATTTCCAGTGGAGCGGTGAAATGCGTAGAGATTGGAAAGAACACCGATGGCGAAGGCACTTTACTGGGCTATTACTGACACTCAGAGACGAAAGCT	Fall/Winter	0.21058	0.00103024		Cyanobacteria_151			Bacteria	Cyanobacteria	Cyanobacteria/Melainabacteria group		Chroococcales	Chroococcaceae	Geminocystis	Geminocystis sp. NIES-3709		Geminocystis sp. NIES-3709						Fall/Winter	Winter/Spring	0.36965	8.12e-06			Fall/Winter	Fall/Winter	0.256524	0.000148044
CGTTATCCGGATTTATTGGGTTTAAAGGGTCCGTAGGCGGGTTCATAAGTCAGTGGTGAAATCCTACAGCTCAACTGTAGAACTGCCATTGAAACTGTGAACCTTGAATATAATTGAAGTGGGCGGAATGTGTCATGTAGCGGTGAAATGCTTAGATATGCCACAGAACACCGATTGCGAAGGCAGCTCACTAAGTTATTATTGACGCTGAGGGACGAAAGCG	Fall/Winter	0.208707	0.00114483		Bacteroidetes_1149			Bacteria	Bacteroidetes	FCB group	Flavobacteriia	Flavobacteriales	Crocinitomicaceae	Fluviicola	Fluviicola taffensis	Fluviicola taffensis DSM 16823	Fluviicola taffensis DSM 16823						Fall/Winter	Fall/Winter	0.178038	0.0366919			Fall/Winter	Fall/Winter	0.18969	0.00536931
CGTTATCCGAAATCATTGGGCGTAAAGCGCCTGTAGGTTGTTTATTAAGTCTGTTGTTAAAGCCTAGGGCTTAACCCTAGAACAGCAATGGAAACTGGTAAACTTGAGTATGGTAGGGGTAGAGGGAATTTCTAGTGTAGCGGTGAAATGCGTAGATATTAGAAAGAACACCAGTGGCGAAAGCGCTCTACTGGACCATTACTGACACTCAGAGGCGAAAGCT	Fall/Winter	0.206383	0.00130324		Cyanobacteria_210			Bacteria	Cyanobacteria	Cyanobacteria/Melainabacteria group		Synechococcales	Acaryochloridaceae	Acaryochloris	Acaryochloris marina	Acaryochloris marina MBIC11017	Acaryochloris marina MBIC11017						Fall/Winter	NA	NA	NA			Fall/Winter	Fall/Winter	0.242727	0.000338709
TGTTATCCGAAATTATTGGGCGTAAAGAGTCTGTAGGTGGCCTACCAAGTCTGGTGTTAAATGTTGGAACTTAATTTCAAACCTGCATCAGAAACTGGTAAGCTTGAGTAAAGTCGAAGTAGAAGGAATTTCCAGTGAAGCGGTGAAATGCGTAGATATTGGAAGGAAGACCGATGGCGAAAGCATTCTACTAGGCTTTTACTGACACTGAGAGACGAAAGCT	Fall/Winter	0.20058	0.00179053		Cyanobacteria_140			Bacteria	Cyanobacteria	Cyanobacteria/Melainabacteria group		Synechococcales	Synechococcaceae	Synechococcus	Synechococcus sp. PCC 8807		Synechococcus sp. PCC 8807						Fall/Winter	NA	NA	NA			Fall/Winter	Fall/Winter	0.215703	0.00150128
CGTTGCTCGGAATTACTGGGCGTAAAGAGCATGTAGGCGGATTGTATAGTCAGGCGTGAAAGCCCCAGGCTCAACCTGGGAACTGCGTTTGATACTTACAGTCTTGAGTCCGAGAGAGGGTGGTGGAATTCCTAGTGTAGAGGTGAAATTCGTAGATATTAGGAAGAACACCAGTGGCGAAGGCGGCCACCTGGCTCGGTACTGACGCTGAGATGCGAAAGCG	Fall/Winter	0.200266	0.00182109		Proteobacteria_5228			Bacteria	Proteobacteria		Alphaproteobacteria	Rhodospirillales	Rhodospirillaceae				Rhodospirillaceae						Fall/Winter	Fall/Winter	0.288294	0.000605836			Fall/Winter	Fall/Winter	0.182539	0.00742374
CGTTAATCGGAATTACTGGGCGTAAAGCGAGCGTAGGTGGCTTGATAAGTCAGATGTGAAATCCCCGGGCTTAACCTGGGAACTGCATCTGATACTGTTAGGCTAGAATAGGTGAGAGGAAGGTAGAATTCCAGGTGTAGCGGTGAAATGCGTAGAGATCTGGAGGAATACCGATGGCGAAGGCAGCCTTCTGGCATCATATTGACACTGAGGTTCGAAAGCG	Fall/Winter	0.197888	0.00206871		Proteobacteria_1917			Bacteria	Proteobacteria		Gammaproteobacteria	Pseudomonadales	Moraxellaceae	Psychrobacter			Psychrobacter						Fall/Winter	Fall/Winter	0.175906	0.0390413			Fall/Winter	Fall/Winter	0.190217	0.00524048
TGTTATTCGTAGTCATTAGGCGTAAAGGGTTCGTAGGTTTTTTAACTAGTTTTCTAAAAAAAACAAGGCATAACTTTGGTATAAAGTTTTAACAGTTAAAATAGAGTTAAAAGGGAGATAATAGTATTTCTAATGTAGAGATAAAATATTGTAATATTAGAAAGAATTTCAGTGGCAAAGGCGATTATCTAAGTTTATACTGACATTGAGGGACGAAAGCG	Fall/Winter	0.191213	0.00293666		Proteobacteria_6887			Bacteria	Proteobacteria		Gammaproteobacteria	Oceanospirillales	Halomonadaceae	Candidatus Carsonella	Candidatus Carsonella ruddii		Candidatus Carsonella ruddii						Fall/Winter	Fall/Winter	0.345438	3.33e-05			Fall/Winter	Fall/Winter	0.209831	0.00202857
CGTTAATCGGAATTACTGGGCGTAAAGCGTTCGTAGGCGGTTATTTAAGCAAGATGTGAAAGCCCAGGGCTCAACCTTGGAACTGCATTTTGAACTGGGTAACTAGAGTACTGTAGAGGGTGGTGGAATTTCCAGTGTAGCGGTGAAATGCGTAGAGATTGGAAGGAACATCAGTGGCGAAGGCGGCCACCTGGACAGATACTGACGCTGAGGAACGAAAGCG	Fall/Winter	0.18996	0.0031324		Proteobacteria_6967			Bacteria	Proteobacteria		Gammaproteobacteria	Alteromonadales	Colwelliaceae	Colwellia	Colwellia sp. MT41		Colwellia sp. MT41						Fall/Winter	Other	0.21084	0.0130557			Fall/Winter	Fall/Winter	0.231203	0.000652737
CGTTATCCGGAATCATTGGGCGTAAAGCGCCTGTAGGTTGTTTAATAAGTCTGTTGTTAAAGACTAGGGCTCAACCCTAGAAAAGCAATGGAAACTACTAGACTAGAGTATGGCAGGGGTAGAGGGAATTTCTAGTGTAGCGGTGAAATGCGTAGATATTAGAAAGAATACCAATTGCGAAGGCAGCTTTCTGGATCATTACTGACACTGAGGAACGAAAGCA	Fall/Winter	0.189612	0.00318891		Cyanobacteria_154			Bacteria	Cyanobacteria			Chroococcales					Chroococcales						Fall/Winter	Fall/Winter	0.234997	0.00552959			Fall/Winter	Fall/Winter	0.186018	0.00635015
CGTTGTCCGGATTTATTGGGCGTAAAGAGCTCGTAGGCGGTTTGGTAAGTCGGGTGTGAAAACTCAGGGCTCAACCCTGAGACGCCACTCGATACTGCCATGACTAGAGTCCGGTAGAGGAGTGTGGAATTCCTAGTGTAGCGGTGAAATGCGCAGATATTAGGAGGAACACCAACAGCGAAGGCAGCACTCTGGGCCGGTACTGACGCTGAGGAGCGAAAGCG	Fall/Winter	0.187001	0.00364251		Actinobacteria_173			Bacteria	Actinobacteria	Terrabacteria group	Acidimicrobiia	Acidimicrobiales	Acidimicrobiaceae	Acidimicrobium	Acidimicrobium ferrooxidans	Acidimicrobium ferrooxidans DSM 10331	Acidimicrobium ferrooxidans DSM 10331						Fall/Winter	Other	0.213645	0.0118679			Fall/Winter	Fall/Winter	0.193873	0.00441942
CGTTATCCGGAATCATTGGGCGTAAAGCGCCTGTAGGTTGTTTAATAAGTCTGTTGTTAAAGACTAGGGCTCAACCCTAGAAAAGCAATGGAAACTACTAGACTAGAGTATGGCAGGGGTAGAGGGAATTTCTAGTGTAGCGGTGAAATGCGTAGATATTAGAAAGAACACCGGTGGCGAAAGCGCTCTACTGGACCATTACTGACACTCAGAGGCGAAAGCT	Fall/Winter	0.184372	0.00415725		Cyanobacteria_135			Bacteria	Cyanobacteria	Cyanobacteria/Melainabacteria group													Fall/Winter	Winter/Spring	0.480115	2.54e-09			Fall/Winter	Fall/Winter	0.178078	0.00903557
CGTTGTCCGGAATTATTGGGTTTAAAGGGTACGTAGGCGGATTAATAAGTCAAAGTTGAAATCCTACAGCTTAACTGTAGAACTGGCTTTGAAACTGTTGATCTTGAGTATGGTAGAGATAGGCGGAATTTATAATGTAGCGGTGAAATGCATAGATATTATAAAGAACACCGATAGCGAAGGCAGCTTGTTGGACCATAACTGACGCTAATGTACGAAAGTG	Fall/Winter	0.183818	0.00427382		Bacteroidetes_123			Bacteria	Bacteroidetes	FCB group	Cytophagia	Cytophagales					Cytophagales						Fall/Winter	NA	NA	NA			Fall/Winter	Fall/Winter2019	0.170954	0.0122568
CGTTAATCGGAATTACTGGGCGTAAAGAGTGCGCAGGCGGCTCTCTAAGACAGGTGTGAAATCCCCGGGCTTAACCTGGGAATGGCGCTTGTGACTGGAGAGCTAGAGTGTGGCAGAGGGGAATGGAATTCCTGGTGTAGCAGTGAAATGCGTAGATATCAGGAGGAACACCGATGGCGAAGGCAGTTCCCTGGGCCAACACTGACGCTCATGCACGAAAGCG	Fall/Winter	0.183147	0.0044188		Proteobacteria_2751			Bacteria	Proteobacteria		Betaproteobacteria	Rhodocyclales	Zoogloeaceae	Thauera	Thauera humireducens		Thauera humireducens						Fall/Winter	Fall/Winter	0.183971	0.0307743			Fall/Winter	NA	NA	NA
GGTTATTCACAATGATTGGGTGTAAAGCAGGACACGGTGATAAGTACAAGTGGAACGCTTTCCGAGGGCTCAACTCAAGGAAAAGTTTTCCAAACTAACTTGATCGAGGTTTGATAGAGTTGAAAGCGGAACTACTGGGGGAGAGGTGTAATTCGTTTTATCTCAGTAGGAACACCAAAAGCGAAAAGCAGCCAACAAATCAACACCTTCCACTATACCTGTAACCT	Fall/Winter	0.18188	0.00470488		Fusobacteria_34			Bacteria	Fusobacteria		Fusobacteriia	Fusobacteriales	Leptotrichiaceae				Leptotrichiaceae						Fall/Winter	NA	NA	NA			Fall/Winter	Fall/Winter	0.166366	0.0148313
CGTTACTCGGAATCACTGGGCGTAAAGCGCGCGCAGGCGGCCTTTTAAGTTGGATGTGAAAGCCTATGGCTCAACCATAGAACTGCATCCAAAACTATTAGGCTAGAGTGTGGGAGAGGAAGATGGAATTAGTTGTGTAGGGGTAAAATCCGTAGAGATAACTAGGAATACCAAAAGCGAAGGCAATCTTCTGGAACATTACTGACGCTGAGGCGCGAAAGCG	Fall/Winter	0.180441	0.00504977		Proteobacteria_4415			Bacteria	Proteobacteria		Epsilonproteobacteria	Campylobacterales	Sulfurovaceae	Sulfurovum			Sulfurovum						Fall/Winter	Fall/Winter	0.288755	0.000593178			Fall/Winter	Fall/Winter	0.174305	0.0106334
CGTTGCTCGGAATTACTGGGCGTAAAGGGTGCGCAGGCGGATTATTAAGCAAGATGTGAAAGCCCAGGGCTCAACCCTGGAACTGCATCTTGAACTGGTAATCTTGAGTCCGTGAGAGGGGGGTAGAATTCCAGGTGTAGAGGTGAAATTCGTTGATATCTGGAGGAATACCGGTGGCGAAGGCGGCCCCCTGGCACGGTACTGACGCTGAGGCACGAAAGCG	Fall/Winter	0.180426	0.00505345		Proteobacteria_6570			Bacteria	Proteobacteria		Alphaproteobacteria	Magnetococcales	Magnetococcaceae	Magnetococcus	Magnetococcus marinus	Magnetococcus marinus MC-1	Magnetococcus marinus MC-1						Fall/Winter	NA	NA	NA			Fall/Winter	Fall/Winter	0.155775	0.0226449
TGTTATCCGGAATTATTGGGCGTAAAGCGTCTGTAGGTTGTTTACCAAGTCTATTGTTAAAGCGTGAAACTTAATTTCATTGTCGCAGTAGAAACTGTTAAACTAGAGTATAATTGAGGTAGAAGGAATTTCCAGTGGAGTGGTGAAATGCGTAGATATTGGAAAGAACACCAATTGCGAAGGCATTCTATTAAATTATTCTGACACTCAGAGACGAAAGCT	Fall/Winter	0.179692	0.00523829		Cyanobacteria_164			Bacteria	Cyanobacteria	Cyanobacteria/Melainabacteria group		Synechococcales	Merismopediaceae	Synechocystis			Synechocystis						Fall/Winter	NA	NA	NA			Fall/Winter	Fall/Winter	0.170146	0.0126795
TTTTATTCGGAATTATTGGGCGTAAAGCGTCTGCAGGTTGATGTAAAAGTCTTTTGTTAAATATCAGGGCTCAACCCGGAATCTGCAAAAGAAACTATATATCTTGAGTATGGTAGAGGTAAGGGGAATTTCCAGTGGAGCGGTGAAATGCGTAGATATTGGAAAGAACACCGACAGCGAAGGCACCTTACTGGGCCATTACTGACACTCAGAGACGAAAGCT	Fall/Winter	0.179558	0.00527256		Cyanobacteria_148			Bacteria	Cyanobacteria	Cyanobacteria/Melainabacteria group		Synechococcales					Synechococcales						Fall/Winter	NA	NA	NA			Fall/Winter	Fall/Winter	0.161967	0.0177316
TGTTATCCGGAATCACTGGGCGTAAAGCGTCTGTAGGTGGTTTAATAAGTCAACTGTTAAATCTTGAGGCTCAACTTCAAAATCGCAGTCGAAACTATTAGACTAGAGTATAGTAGAGGTAAAGGGAATTTCCAGTGGAGCGGTGAAATGCGTAGATATTGGAAAGAACACCGATGGCGAAAGCACTTTACTGGGCTATTACTAACACTCAGAGACGAAAGCT	Fall/Winter	0.178305	0.00560388		Cyanobacteria_135			Bacteria	Cyanobacteria	Cyanobacteria/Melainabacteria group													Fall/Winter	Winter/Spring	0.178477	0.0362243			Fall/Winter	NA	NA	NA
CGTTATCCGGAATCATTGGGCGTAAAGCGCCTGTAGGTTGTTTAATAAGTCTGTTGTTAAAGACTAGGGCTTAACCCTAGAAAAGCAATGGAAACTACTAGACTAGAGTATGGCAGGGGTAGAGGGAATTTCTAGTGTAGCGGTGAAATGCGTAGATATTAGAAAGAATACCAATTGCGAAGGCAGCTTTCTGGATCATTACTGACACTGAGGAACGAAAGCA	Fall/Winter	0.176541	0.00610195		Cyanobacteria_154			Bacteria	Spirochaetes		Spirochaetia	Leptospirales	Leptospiraceae	Turneriella	Turneriella parva	Turneriella parva DSM 21527	Turneriella parva DSM 21527						Fall/Winter	NA	NA	NA			Fall/Winter	Fall/Winter	0.167628	0.0140799
CGTTAATCGGAATTACTGGGCGTAAAGCGCGCGTAGGCGGCTCTTTAAGTCGGATGTGAAAGCCCCGGGCTCAACCTGGGAACTGCATCCGATACTGGGGAGCTAGAGTGTAGGAGAGGGAGGTAGAATTCCATGTGTAGCAGTGAAATGCGTAGATATGTGGAGGAATACCAGTGGCGAAGGCGGCCTCCTGGCTTAACACTGACGCTGAGGTGCGAAAGCG	Fall/Winter	0.173837	0.00694231		Proteobacteria_1591			Bacteria	Proteobacteria		Gammaproteobacteria	Cellvibrionales	Halieaceae				Halieaceae						Fall/Winter	Chlorophyll-a	0.590631	2.44e-14			Fall/Winter	Chl-a	0.429863	4.91345e-11
CGTTATCCGGAATCACTGGGTTTAAAGGGTACGTAGGCGGTTAATTAAGTCAGACGTCAAAGGCTGTGGCTAAACCACGGTACGCGTATGAAACTGGTTAACTTGAATATGTTCGAGGTGCATGGAATGCATCATGTAGCGGTGAAATGCTTAGATATGATGTAGAACACCAATTGCGAAGGCAGTGCACTAGGGCATTATTGACGCTGAGGTACGAAAGCG	Fall/Winter	0.172942	0.00724256		Bacteroidetes_224			Bacteria	Bacteroidetes	FCB group	Saprospiria	Saprospirales	Saprospiraceae	Saprospira	Saprospira grandis	Saprospira grandis str. Lewin	Saprospira grandis str. Lewin						Fall/Winter	NA	NA	NA			Fall/Winter	Fall/Winter	0.201899	0.00300868
CGTTATTCGGCATGATTGGGCGTAAAGGGTCCGTAGACTGCAAAGTAAGTTTTTTGTTAAATTTTAAGACCCAATCTTAATTCTGCAATTAATACTGCTTTGCTTTGAGTTTAATACAGAAAAGTAGAATTTTATACGACAGGGGTGAAATCCGTAGATATATAAAGGAATGCCAACAGCGAAGGCAACTTTTTGGTATAAACTGACGTTGAGGGACGAAAGCG	Fall/Winter	0.17067	0.00805689		Proteobacteria_3590			Bacteria	Proteobacteria		Betaproteobacteria			Candidatus Nasuia	Candidatus Nasuia deltocephalinicola		Candidatus Nasuia deltocephalinicola						Fall/Winter	NA	NA	NA			Fall/Winter	Fall/Winter	0.210354	0.00197558
CGTTGTTCGGAATTACTGGGCGTAAAGCGTACGTAGGCGGATTAGTAAGTTAGAGGTGAAATCCCAGGGCTCAACCCTGGAACTGCCTTTAATACTGCTAGTCTTGAGTTCGAGAGAGGTGAGTGGAATTCCAAGTGTAGAGGTGAAATTCGTAGATATTTGGAGGAACACCAGTGGCGAAGGCGGCTCACTGGCTCGATACTGACGCTGAGGTACGAAAGTG	Fall/Winter	0.170574	0.00809306		Proteobacteria_6043			Bacteria	Proteobacteria		Alphaproteobacteria	Rhodobacterales	Rhodobacteraceae	Yoonia	Yoonia vestfoldensis		Yoonia vestfoldensis						Fall/Winter	Winter/Spring	0.174685	0.0404424			Fall/Winter	NA	NA	NA
TGTTATTCGAAATTACTGGGCGTAAAGGGTAAGTAGGTGGTTGATTATGTTGTATATTAAAGTCCAAGGCTTAACTTTGGGAAAGTGTACAAAACGATTCAACTAGAATAAGAGTTAGGACAGTGGAATTTCTAATGGAGGGTTAAGTTCTGTAGATATTAGAAGGAACATCAAAGGCGAAGGCAACTGTCTGTCTCTTTATTGACGCTGAATTACGAAGGCA	Fall/Winter	0.170303	0.00819605		Proteobacteria_3590			Bacteria	Proteobacteria		Betaproteobacteria			Candidatus Nasuia	Candidatus Nasuia deltocephalinicola		Candidatus Nasuia deltocephalinicola						Fall/Winter	NA	NA	NA			Fall/Winter	Fall/Winter	0.160199	0.0190294
TGTTATCCGGAATCACTGGGCGTAAAGCGTCTGTAGGTGGTTTAATAAGTCGAATGTTAAATCTTGAAGCTTAACTTCGAAATCGCATTCGAAACTATTAGACTTGAGTATAGTAGAGGTAAAGGGAATTTCCAGTGGAGCGGTGAAATGCGTAGATATTGGAAAGAACACCAATTGCGAAGGCACTTTACTGGGCTATTACTGACACTCAGAGACGAAAGCT	Fall/Winter	0.17026	0.00821251		Cyanobacteria_155			Bacteria	Cyanobacteria	Cyanobacteria/Melainabacteria group		Chroococcales					Chroococcales						Fall/Winter	Fall/Winter	0.318932	0.000137526			Fall/Winter	Fall/Winter	0.201174	0.00311686
CGTTATCCGGAATCACTGGGCATAAAGCGTCTGTAGGTTGTTTAGTAAGTCTGCTGTTAAAGACTGGGGCTCAACCCCAGAAAAGCAGTGGAAACTGCTAGACTTGAGTGTGGTAGAGGTAGAGGGAATTCCTAGTGTAGCGGTGAAATGCGTAGATATTAGGAAGAACACCAATGGCGAAGGCACTCTACTGGGCCATAACTGACACTGAGAGACGACAGCT	Fall/Winter	0.168146	0.00905646		Cyanobacteria_154			Bacteria	Cyanobacteria	Cyanobacteria/Melainabacteria group		Chroococcales					Chroococcales						Fall/Winter	Fall/Winter	0.432356	1.19e-07			Fall/Winter	Fall/Winter	0.195643	0.00406514
CGTTGCTCGGAATTACTGGGCGTAAAGCGCGCGTAGGCGGCGCACCAAGTGAGGCGTGAAATCCCCGGGCTTAACCCGGGAACTGCGTTTCATACTGGTGTGCTAGAATCCGAGAGAGGGTAGTGGAATTCCCAGTGTAGAGGTGAAATTCGTAGATATTGGGAAGAACACCAGTGGCGAAGGCGGCTACCTGGCTCGGTATTGACGCTGAGGTGCGAAAGCG	Fall/Winter	0.167442	0.00935431		Proteobacteria_6456			Bacteria	Proteobacteria		Alphaproteobacteria						Alphaproteobacteria						Fall/Winter	Fall/Winter	0.232624	0.00603948			Fall/Winter	NA	NA	NA
CGTTATTCTTTTTAATATTGGCGTAAAACGTATGTAGGTTGTTTTTAGTTTGCTATTTAATAAAATTCCAAATTTTTTTGGATTTGTTTTATAAACATAAAAACGAATTGAGTTTTTTAAAAAAAAGAAGAATTTTTTTAAAAAAGGGTAAAATCTTAAAAATTAAAAAAGAATACCAAAGGTGAAAACATCTTTTTATAAAAAACTGGCACTGATTATACGAAAGTA	Fall/Winter	0.166782	0.00964126		Proteobacteria_3590			Bacteria	Proteobacteria		Betaproteobacteria			Candidatus Nasuia	Candidatus Nasuia deltocephalinicola		Candidatus Nasuia deltocephalinicola						Fall/Winter	Fall/Winter	0.179702	0.0349425			Fall/Winter	Fall/Winter	0.152555	0.0256354
CGTTGTCCGGATTTACTGGGCGTAAAGGGTACGTAGGCGTTTTAAAAAGTTGAATGTTAAATATCTTAGCTTAACTAAGAAAGTGCATTCAAAACTGTTAAAATAGAGTTTGAGAGAGGAACGCAGAATTCATGGTGGAGCGGTGACATGCGTAGATATCATGAGGAAAGTCAAATGCGAAGGCAGCCTTCTGGCTCAAAACTGACGCTGAGGTACGAAAGCG	Fall/Winter	0.162523	0.0116879		Nitrospirae_5			Bacteria	Nitrospirae		Nitrospira	Nitrospirales	Nitrospiraceae	Thermodesulfovibrio	Thermodesulfovibrio yellowstonii	Thermodesulfovibrio yellowstonii DSM 11347	Thermodesulfovibrio yellowstonii DSM 11347						Fall/Winter	Spring	0.225962	0.00770182			Fall/Winter	NA	NA	NA
CGTTATCCGGAATTATTGGGTTTAAAGGGTCCGTAGGCGGTCTATTAAGTCAGAGGTGAAATCTTGTAGCTCAACTATAAAATTGCCTTTGAAACTATTAGACTTGAAACAATTTGACGTGAGTGGAATGAGTAGTGTAGCGGTGAAATGCATAGATATTACTCAGAACACCGATAGCGAAGGCAGCTCACGAAGATTGATTTGACGCTGATGGACGAAAGCG	Fall/Winter	0.161346	0.0123171		Bacteroidetes_633			Bacteria	Bacteroidetes	FCB group	Flavobacteriia	Flavobacteriales	Weeksellaceae	Chryseobacterium	Chryseobacterium sp.		Chryseobacterium sp.						Fall/Winter	Other	0.199096	0.0192291			Fall/Winter	Fall/Winter	0.176053	0.00986482
CGTTATCCGGAATCATTGGGTTTAAAGGGTGCGTAGGCGGATTAATAAGTCAGAGGTGAAATCCTGCAGCTCAACTGTAGAACTGCCTTTGATACTGTTAGTCTTGAATTTAGTTGAAGTAGGCGGAATGTAACATGTAGCGGTGAAATGCATAGAGATGTTACAGAACACCGATTGCGAAGGCAGCTTACTAAGCTAATATTGACGCTGATGCACGAAAGCG	Fall/Winter	0.160829	0.0126025		Bacteroidetes_274			Bacteria	Bacteroidetes	FCB group							FCB group						Fall/Winter	Other	0.265589	0.00164206			Fall/Winter	Fall/Winter	0.214459	0.0016012
TGTTATCCGGAATCACTGGGCGTAAAGCGTCTGTAGGTTGTTGTTTAAGTCAACTGTTAAATCTTGAGGCTTAACCTCGAAATCGCAGTCGAAACTATTCAACTTGAGTATAGTAGAGGTAAAGGGAATTTCCAGTGGAGCGGTGAAATGCGTAGATATTGGAAAGAACACCGATGGCGAAGGCACTTTACTGGGCTATTACTGACACTCAGAGACGAGAGCT	Fall/Winter	0.160168	0.0129764		Cyanobacteria_148			Bacteria	Cyanobacteria	Cyanobacteria/Melainabacteria group		Synechococcales					Synechococcales						Fall/Winter	NA	NA	NA			Fall/Winter	Fall/Winter	0.156878	0.0216922
CGTTATTCGGATTTACTGGGCGTAAAGGGTCCGTAGGGGGATGTATAAGTTTGATGTGAAATTTCGAGGCTCAACCTCGAACCTGCATTGAAAACTGTTCATCTAGAATCCGGTAGAGGTAAGTGGAATTTGTGGTGTAGCGGTGGAATGCGTAGATATCACAAGGAACATCAAAGGCGAAAGCAGCTTACTGGGCCGGTATTGACCCTGAGGGACGAAAGCT	Fall/Winter	0.159438	0.0134003		Spirochaetes_148			Bacteria	Spirochaetes		Spirochaetia						Spirochaetia						Fall/Winter	NA	NA	NA			Fall/Winter	Fall/Winter	0.166381	0.0148218
CGTTATCCGGAATCATTGGGTTTAAAGGGTCCGTAGGCGGGCAATTAAGTCAGAGGTGAAATCCCACAGCTCAACTGTGGAACTGCCTTTGATACTGGTTGTCTTGAGTTATAGTGAAGTAGATAGAATATGTAGTGTAGCGGTGAAATGCATAGATATTACATAGAATACCGATTGCGAAGGCAGTCTACTAACTGTATACTGACGCTAATGGACGAAAGCG	Fall/Winter	0.159106	0.0135975		Bacteroidetes_1144			Bacteria	Bacteroidetes	FCB group	Flavobacteriia	Flavobacteriales	Flavobacteriaceae				Flavobacteriaceae						Fall/Winter	NA	NA	NA			Fall/Winter	Fall/Winter	0.160365	0.0189041
CGTTACTCGGATTCACTGGGCGTAAAGGGTGAGTAGGTGGCCAAGTATGTCAGGTGTGAAATCCCGGGGCTTAACCCCGGAACTGCGCCTGAAACTACTTGGCTAGAGTCTCGGAGAGGATAGTGGAATTCCAAGTGTAGCGGTGAAATGCGTAGATATTTGGAGGAACACCAGTGGCGAAGGCGACTATCTGGACGAGTACTGACGCTCAATCACGAAAGCG	Fall/Winter	0.158968	0.0136799		Verrucomicrobia_5			Bacteria	Verrucomicrobia	PVC group	Opitutae	Puniceicoccales	Puniceicoccaceae	Coraliomargarita	Coraliomargarita akajimensis	Coraliomargarita akajimensis DSM 45221	Coraliomargarita akajimensis DSM 45221						Fall/Winter	Fall/Winter	0.216787	0.0106508			Fall/Winter	Fall/Winter	0.161088	0.0183671
CGTTGTTCGGAATCACTGGGCATAAAGAGTTCGTAGGCGGATATATCAGTTGGGTGTGAAATCCCGGGGCCTACCCCCGGAACTGCACTCAATACTGTATATCTGGAGTCCTTCAGGGGTAAGTGGAATTCCATGTGTAGCGGTGAAATGCGTAGATATATGGGAGAACGCCAATGGCGAAGGCAGCTTACTGGGGAGTGACTGACGCTGAGGAACGAAAGTT	Fall/Winter	0.158034	0.01425		phylum_reps_751																		Fall/Winter	Winter/Spring	0.306107	0.000260934			Fall/Winter	Fall/Winter	0.157925	0.0208201
TGTTATCCGGAATCACTGGGCGTAAAGCGTCTGTAGGTGGTTGTTTAAGTCAACTGTTAAATCTTGAGGCTCAACTTCAAAATCGCAGTCGAAACTATTCAACTAGAGTATAGTAGGGGTAAAGGGAATTTCCAGTGGAGCGGTGAAATGCGTAGATATTGGAAAGAACACCGATGGCGAAGGCACTTTACTGGGCTATTACTAACACTCAGAGACGAAAGCT	Fall/Winter	0.15726	0.0147389		Cyanobacteria_160			Bacteria	Cyanobacteria	Cyanobacteria/Melainabacteria group													Fall/Winter	Fall/Winter	0.186363	0.028628			Fall/Winter	Fall/Winter	0.150389	0.0278324
CGTTGTTCGGAATCACTGGGCATAAAGAGTTCGTAGGCGGATGCATCAGTTGGGTGTGAAATCCCGGGGCTTACCCCCGGAACTGCACTCAATACTGTGTATCTGGAGTCCTTCAGGGGAAAGTGGAATTCCATGTGTAGCGGTGAAATGCGTAGATATATGGGAGAACGCCAATGGCGAAGGCAGCTTTCTGGGAAGTGACTGACGCTGAGGAACGAAAGTT	Fall/Winter	0.156356	0.0153275		Spirochaetes_30			Bacteria	Spirochaetes		Spirochaetia	Leptospirales	Leptospiraceae	Turneriella	Turneriella parva	Turneriella parva DSM 21527	Turneriella parva DSM 21527						Fall/Winter	Fall/Winter	0.179014	0.035658			Fall/Winter	NA	NA	NA
CGTTGTTCGGAATTATTGGGCGTAAAGCGTGCGTAGGCGGCATAGTAAGTCAGCTGTGAAAGCCCAGGGCTCAACCTTGGAATTGCAGTTGAAACTACTAAGCTAGAGTATGGTGGGGGATAGTGGAATTCTTAGTGTAGGGGTGAAATCCGTAGATATTAAGAGGAACACCAGTGGCGAAGGCGACTATCTACACCATTACTGACGCTGAGGTACGAAAGCG	Fall/Winter	0.155275	0.0160592		Proteobacteria_4406			Bacteria	Proteobacteria														Fall/Winter	NA	NA	NA			Fall/Winter	NA	NA	NA
CGTTATCCGGAATCATTGGGTTTAAAGGGTCCGTAGGCGGTTTTTTAAGTCAGAGGTGAAATCCTGCAGCTCAACTGTAGAATTGCCTTTGATACTGAAAGACTTGAGTTATTGTGAAGTGGTTAGAATGTGTGGTGTAGCGGTGAAATGCATAGATATCACACAGAATACCGATTGCGAAGGCAGATCACTAACAATATACTGACGCTCATGGACGAAAGCG	Fall/Winter	0.153095	0.0176271		Bacteroidetes_975			Bacteria	Bacteroidetes	FCB group	Flavobacteriia	Flavobacteriales	Flavobacteriaceae	Kordia			Kordia						Fall/Winter	Fall/Winter	0.249177	0.00320688			Fall/Winter	NA	NA	NA
CGTTATTCGTCTTTATTGGGTGTAAAGGGTATGTAGGTAGTTTTTTTAATTTTTCTTTTAAATTTAGGTATTAGTAACTTAAAAAGAGATTTTAATTACTAGAACTTGAGTTATAAGGTAGTTAATAGAATTTGTAAAGTAGGGGTAATATCCGTAGATATTACAAGGAATACCAAAAGCGAAGGCAGTTAACTAATTATAACTGACACTTAGATACGAAGGTA	Fall/Winter	0.151627	0.0187566		Proteobacteria_6887			Bacteria	Proteobacteria		Gammaproteobacteria	Oceanospirillales	Halomonadaceae	Candidatus Carsonella	Candidatus Carsonella ruddii		Candidatus Carsonella ruddii						Fall/Winter	NA	NA	NA			Fall/Winter	Fall/Winter	0.178439	0.0088945
TGGTCGTCGCTTTTATTGGGCCTAAAACGTCCGTAGCCTGTTTGGTAAATCTGTGGGTAAATCAACGAGCTTAACTCGTTGAATTCTGCAGAGACTGCCAGACTAGGGACCGGGAGAGGTATGAGGTACTCTGGGGGTAGGGGTAAAATCCTGTCATCCTCAGAGGACCACCTGTTGCGAAGGCGTCATACTGGAACGGATCCGACGGTCAGGGACGAAGCCT	Fall/Winter	0.151254	0.0190529		archaea_2			Archaea	Euryarchaeota	Diaforarchaea group	Thermoplasmata	Methanomassiliicoccales					Methanomassiliicoccales						Fall/Winter	Spring	0.269446	0.00139444			Fall/Winter	NA	NA	NA
TGTTATCCGGAATCACTGGGCGTAAAGCGTCTGTAGGTGGTCAAATAAGTCAACTGTTAAATCTTGAGGCTCAACTTCAAAATCGCAGTCGAAACTATTAGACTAGAGTATAGTAGAGGTAAAGGGAATTTCCAGTGGAGCGGTGAAATGCGTAGATATTGGAAAGAACACCGATGGCGAAAGCACTTTACTGGGCTATTACTAACACTCAGAGACGAAAGCT	Fall/Winter	0.149616	0.0204056		Cyanobacteria_135			Bacteria	Cyanobacteria	Cyanobacteria/Melainabacteria group													Fall/Winter	Winter/Spring	0.231965	0.0061884			Fall/Winter	Fall/Winter	0.14283	0.0368072
CGTTTTCCGGATTTATTGGGTTTAAAGAGTGCGTAGGTGGTTTATTAAGTCAGTGGTGAAATCCTGCAGCTCAACTGTAGAACTGCCATTGATACTGGTAAACTTGAGTTTGGTTTAGGTAAGTGGAATTTATGATGTAGCGGTGAAATGCATAGATATCATAAGGAACACCAATAGCGAAGGCAGCTTACTGGACCATAACTGACACTGAGGCACGAAAGCG	Fall/Winter	0.149206	0.0207569		Bacteroidetes_94			Bacteria	Bacteroidetes	FCB group	Cytophagia	Cytophagales					Cytophagales						Fall/Winter	NA	NA	NA			Fall/Winter	Fall/Winter	0.159071	0.0199002
CGTTATTCAGAATGATTGGGTGTAAAGAGTTCGTAGGCGGTATTTGTTGTTATATGTAAAATACTAGGTTTGTTACTTAGATATGCATTTAATACTCTTTTACTGGAGTATAGTAGAGGATAACAGAATTTCATACATAGGAGTAAAATCCGATCATTTATGAAGGAATGTCAGTGGCGAAAGCGGTTATCTGGACTATTTACTGACGCTGAGGAACGAAAGCA	Fall/Winter	0.146009	0.02368		Proteobacteria_3590			Bacteria	Proteobacteria		Betaproteobacteria			Candidatus Nasuia	Candidatus Nasuia deltocephalinicola		Candidatus Nasuia deltocephalinicola						Fall/Winter	Winter/Spring	0.182022	0.0326215			Fall/Winter	Fall/Winter	0.191175	0.00501293
CGTTATCCGGAATTATTGGGCGTAAAGCGTCTGTAGGTTGTTTGAAAAGTCCGGTGTCAAAGACCAGAGCTTAACTCTGGACCGGCATTAGAAACTCTCAAACTAGAGCACGGTAGAGGTATGGGGAACTCCTTGTGTAGCGGTGAAATGCGTAGATATAAGGAAGAACACCGGTTGCGAAAGCGCCATACTGGGCCGTAGCTGACACTCAGAGACGAAAGCT	Fall/Winter	0.14591	0.0237756		Cyanobacteria_160			Bacteria	Cyanobacteria	Cyanobacteria/Melainabacteria group													Fall/Winter	NA	NA	NA			Fall/Winter	Fall/Winter	0.134867	0.0487935
CGTTATTCAAAATTACTGGGCGTAAAGAGTTCGTAGACTGTAATGTAAGTTAATTGTTAAATTTTAGATTTTTTAAAATAACATTTAATACTGCTTTACTTGAGTTTTAAGTAGAAAAATGGAATTTTACATGTAAAGGTAACATTTTATGATATGTAGAGGAACATCTTAGTGAAAACGATTTTTTGTAAAAACTGACGTTGAGGAACGAAAGTA	Fall/Winter	0.145232	0.0244417		Proteobacteria_6887			Bacteria	Proteobacteria		Gammaproteobacteria	Oceanospirillales	Halomonadaceae	Candidatus Carsonella	Candidatus Carsonella ruddii		Candidatus Carsonella ruddii						Fall/Winter	NA	NA	NA			Fall/Winter	Fall/Winter	0.137102	0.0451399
CGTTATTTGGAATTACTGGGCGTAAAGAGTTCGTAGACGGTATTATAAGTTAATTGTTAAATTTTAAAATTCAATTTTAAAACAGCACTTAATACTATTTTACTTTGAGTTTAAATTAGAAGAATAGAATTCCATGTGAAGAAGTAATATTTGTAGATATATGGAGGAATACCTTTAGTGAAGACGATTCTTTATAAAAAACTGACGTTGAGGAACGAAAGTG	Fall/Winter	0.144433	0.0252468		Proteobacteria_6887			Bacteria	Proteobacteria		Gammaproteobacteria	Oceanospirillales	Halomonadaceae	Candidatus Carsonella	Candidatus Carsonella ruddii		Candidatus Carsonella ruddii						Fall/Winter	NA	NA	NA			Fall/Winter	Fall/Winter	0.142231	0.0376125
CGTTACTCGGAATTACTGGGCGTAAAGGGAGCGCAGGCGGTCTATTAAGTCAGGTGTGAAAGCCCGGGGCTCAACCCCGGAACTGCACCTGAAACTGGTAGACTTGAGGATGAGAGAGGAAAGTAGAATTTCTGGTGTAGAGGTGAAATTCGTTGATATCAGAAGGAATACCCGTGGCGAAGGCGGCTTTCTGGCTCATTTCTGACGCTGAGGCTCGAAAGTG	Fall/Winter	0.143168	0.0265682		Proteobacteria_4290			Bacteria	Proteobacteria		Deltaproteobacteria	Desulfobacterales	Desulfobacteraceae				Desulfobacteraceae						Fall/Winter	Winter/Spring	0.350218	2.54e-05			Fall/Winter	Fall/Winter	0.161161	0.0183133
TGTTATCCGGAATCACTGGGCGTAAAGCGTCTGTAGATGGTTTTGTGTGTCTATTGTTAAAGCTCAAGGCTTAACCTTGAATCGGCAATAGAAACTACATAACTCGAGTATGGTAGGGGTAGAGGGAATTTCCAGTGGAGCGGTGAAATGCGTTGATATTGGAAAGACCACCAACGGCGAAGGCATTCTACTGGGCCGTTACTGACATTAAGAGACGAAAGCT	Fall/Winter	0.1422	0.0276194		Cyanobacteria_159			Bacteria	Cyanobacteria	Cyanobacteria/Melainabacteria group													Fall/Winter	Winter/Spring	0.241417	0.00433727			Fall/Winter	NA	NA	NA
TGTTATCCGGAATCACTGGGCGTAAAGCGTCTGTCGGTGGTTGGACAAGTCAACTGTTAAATCTTGAGGCTCAACCTCAAAATCGCAGTCGAAACTGTTTGACTAGAGTATAGTAGGGGTAAAGGGAATTTCCAGTGGAGCGGTGAAATGCGTAGATATTGGAAAGAACACCGATGGCGAAGGCACTTTACTGGGCTATTACTGACACTCAGAGACGAAAGCT	Fall/Winter	0.14029	0.0297976		Cyanobacteria_159			Bacteria	Cyanobacteria	Cyanobacteria/Melainabacteria group													Fall/Winter	Winter/Spring	0.238097	0.00492157			Fall/Winter	Fall/Winter	0.194942	0.00420232
CGTTATCCGGAATCATTGGGCGTAAAGCGCCTGTAGGTTGTTTACAAAGTCTGTTGTTAAAGACTAGGGCTTAACCCTAGAAAAGCAATGGAAACTCGTAGACTAGAGTATGGCAGGGGTAGAGGGAATTTCTAGTGTAGCGGTGAAATGCGTAGATATTAGAAAGAACACCGGTGGCGAAAGCGCTCTACTGGACCATTACTGACACTCAGAGGCGAAAGCT	Fall/Winter	0.138846	0.0315408		Cyanobacteria_135			Bacteria	Cyanobacteria	Cyanobacteria/Melainabacteria group													Fall/Winter	NA	NA	NA			Fall/Winter	Fall/Winter	0.139186	0.041942
CGTTAATCGGAATTACTGGGCGTAAAGCGTGCGCAGGCGGTTTTATAAGTCAGATGTGAAATCCCCGAGCTCAACTTGGGAACTGCGTTTGAAACTGTAAGACTAGAGTGTGTCAGAGGGGGGTAGAATTCCATGTGTAGCAGTGAAATGCGTAGATATATGGAGGAATACCAATGGCGAAGGCAGCCCCCTGGGATAACACTGACGCTCATGCACGAAAGCG	Fall/Winter	0.138427	0.0320621		Proteobacteria_3031			Bacteria	Proteobacteria		Betaproteobacteria	Neisseriales	Chromobacteriaceae	Aquaspirillum	Aquaspirillum sp. LM1		Aquaspirillum sp. LM1						Fall/Winter	Fall/Winter	0.368617	8.64e-06			Fall/Winter	NA	NA	NA
CGTTACCCGGAATTATTGGGCGTAAAGTGTTCGTAGACTGTATTTGATTTTTTATGTAAAATATCAGGCTTAAAGCTTGAAAATGCGTATAATAAACTTTCGACTAGAGTTTAACAGAGGATAACAGAATTTTATAGTATAGGGGTAAAATCCGAAGATTTATAAAGGAATGTCAGCGGCGAAGGCGGTTATCTGGGTTATTACTGACGTTGAGGAACGAAAGCG	Fall/Winter	0.138361	0.0321443		Proteobacteria_3590			Bacteria	Proteobacteria		Betaproteobacteria			Candidatus Nasuia	Candidatus Nasuia deltocephalinicola		Candidatus Nasuia deltocephalinicola						Fall/Winter	NA	NA	NA			Fall/Winter	NA	NA	NA
TGTTATTCGGAATGACTAGGCGTAAAGCGCACATAGACTGTTTTTTAAGTTGAAATTTAAAGTAGGGAGCTTAACTTCTAAATTGGTTTCAATACTAATAAACTAGAGTAAGTATAGAGGATAGTGGAATTTTTAATAAAGAGTTGAAATTCGTCGACATTAGAAGGAAGGCCAATGGCGAAGGCAACTATCTAGTTCTTAACTGACGTTGTTGTGCGAAAGCA	Fall/Winter	0.135112	0.0364551		Proteobacteria_5121			Bacteria	Proteobacteria		Alphaproteobacteria	Rickettsiales	Candidatus Midichloriaceae	Candidatus Fokinia	Candidatus Fokinia solitaria		Candidatus Fokinia solitaria						Fall/Winter	Fall/Winter	0.229743	0.0067145			Fall/Winter	NA	NA	NA
CGTTAATCGGAATTACTGGGCGTAAAGCGCACGTAGGTGGTTTGTTAAGTTGAATGTGAAATCCCCGGGCTCAACCTGGGAGCTGCATCCAAAACTGGCAGGCTAGAGTATGGCAAAGGGTGGTGGAATTTCCTGTGTAGCGGTGAAATGCGTAGATATAGGAAGGAACACCAGTGGCGAAGGCGACCACCTGGGCTGATACTGACACTGAGGTGCGAAAGCG	Fall/Winter	0.135024	0.0365782		Proteobacteria_2244			Bacteria	Proteobacteria		Gammaproteobacteria	Pseudomonadales	Pseudomonadaceae	Pseudomonas	Pseudomonas viridiflava		Pseudomonas viridiflava						Fall/Winter	Winter/Spring	0.235319	0.00546343			Fall/Winter	Fall/Winter	0.150767	0.0274372
CGTTATTCGGTGTAATTTGGTGTAAAGGGTTCGTAGGCTGTAATAAGGTTGTTTAAATTGAAATTAAGAGACCTAATCTCTTTTAAGGTATTTAAAAACACTTTTACTTGGGTATAAAAGAGGATTATAGAATTTTAAAGGGAGAGGTAAAATTTTAAGATCTTTAAAGGAATATCAAAAGCGAAAGCAATAATCTGGTTTATTTTTACCGACGCTGAGGAACGAAAGAA	Fall/Winter	0.13328	0.039094		Proteobacteria_6887			Bacteria	Proteobacteria		Gammaproteobacteria	Oceanospirillales	Halomonadaceae	Candidatus Carsonella	Candidatus Carsonella ruddii		Candidatus Carsonella ruddii						Fall/Winter	Spring	0.208006	0.0143597			Fall/Winter	NA	NA	NA
TGTTATTCGGAATAATTGGGCGTAAATGGCGTGTAGGTTGTGCTTCGCTGTTATCGGTTAAATCCCCATCGATATGGTGGGTAAGGCTGATAGAACGGTTGTACTAGAGAGTGAGAGAGGATACGGGAATTTCGAGTGGAGAAGTTAAATTCTTAGATATTCGAAGGAAGGCCAACTGCGAAGGCACATATCTGGCTCATTTCTGACACTGAGGCGCGAAGGCG	Fall/Winter	0.132776	0.0398474		Proteobacteria_5170			Bacteria	Proteobacteria		Alphaproteobacteria	Rickettsiales	Anaplasmataceae	Wolbachia			Wolbachia						Fall/Winter	Winter/Spring	0.238577	0.00483301			Fall/Winter	NA	NA	NA
CGTTATCCGGATTTATTAGGTTTAAAGGGTTCGCAGGCGGAATTTTAAGTCAGTGGTGAAAGCCTATAGCTCAACTATAGAACTGCCATTGATACTGAAATTCTTGAGTATAGATGAAGTGGGCGGAATATGTCATGTAGCGGTGAAATGCATAGATATGACATGGAACACCAATTGCGAAGGCAGCTCACTAAACTATTACTGACGCTCATGAACGAAAGCA	Fall/Winter	0.132067	0.0409277		Bacteroidetes_518			Bacteria	Bacteroidetes	FCB group	Flavobacteriia	Flavobacteriales	Schleiferiaceae	Owenweeksia	Owenweeksia hongkongensis	Owenweeksia hongkongensis DSM 17368	Owenweeksia hongkongensis DSM 17368						Fall/Winter	NA	NA	NA			Fall/Winter	NA	NA	NA
CGTTATCCGGATTTATTAGGTTTAAAGGGTTCGCAGGCGGAATTTTAAGTCAGTGGTGAAAGCCTATAGCTCAACTATAGAACTGCCACTGATACTGATATTCTTGAGTATAGATGAAGTGGGCGGAATATGTCATGTAGCGGTGAAATGCATAGATATGACATGGAACACCAATTGCGAAGGCAGCTCACTAAACTATCACTGACGCTCATGAACGAAAGCA	Fall/Winter	0.130732	0.0430307		Bacteroidetes_518			Bacteria	Bacteroidetes	FCB group	Flavobacteriia	Flavobacteriales	Schleiferiaceae	Owenweeksia	Owenweeksia hongkongensis	Owenweeksia hongkongensis DSM 17368	Owenweeksia hongkongensis DSM 17368						Fall/Winter	Fall/Winter	0.217387	0.0104314			Fall/Winter	NA	NA	NA
GAATGACTATAAATTGGGTTTAAAACGTGGGAAGACGGATTGGGAATTACCTCATAAATCCCTTGTAAAGCAAGGACCTTGAGATAATAACCCCTTTCTAGAATGTAGGTGAATTTAAGATTATTGCTGAAGTAGCGGTCAAATGCAACGATATCAGTAGGAATACCAAGGAGAAGTCACTTAAAGGACATACTATTGACGTTAAACCACGAAAGCC	Fall/Winter	0.130421	0.0435343		Proteobacteria_3590			Bacteria	Proteobacteria		Betaproteobacteria			Candidatus Nasuia	Candidatus Nasuia deltocephalinicola		Candidatus Nasuia deltocephalinicola						Fall/Winter	Spring	0.271808	0.00126011			Fall/Winter	NA	NA	NA
CGTTATCCGGAATCATTGGGTTTAAAGGGTCCGTAGGTGGTCTATTAAGTCAGAGGTGAAAGCCTATCGCTCAACGATAGAACGGCCTTTGATACTGATAGACTTGAGTTATTGTGAAGTAGTTAGAATATGTAGTGTAGCGGTGAAATGCATAGATATTACATAGAATACCGATTGCGAAGGCAGATTACTAACAATACACTGACACTGAGGGACGAAAGCG	Fall/Winter	0.129943	0.0443149		Bacteroidetes_980			Bacteria	Bacteroidetes	FCB group	Flavobacteriia	Flavobacteriales	Flavobacteriaceae	Winogradskyella	Winogradskyella sp. J14-2		Winogradskyella sp. J14-2						Fall/Winter	Fall/Winter	0.207003	0.0148483			Fall/Winter	NA	NA	NA
CATTATTCGGAATTACTGGGCGTAAAGGGTCCGCAGGTGGTTTACTAAGTCAGATGTGAAATTTCAGTGCTCAACACTGAACCTGCATTTGAAACTGGTAGACTAGAGTATGTGAGAGGTAAGCGGAATTTGTGGTGTAGCGGTGGAATGCGTAGATATCACAAGGAAGACCAAAGGCGAAGGCAGCTTACTGGCACAATACTGACACTCATGGACGAAGGCT	Fall/Winter	0.127679	0.048181		Proteobacteria_6696			Bacteria	Proteobacteria		Gammaproteobacteria	Thiotrichales	Francisellaceae				Francisellaceae						Fall/Winter	NA	NA	NA			Fall/Winter	NA	NA	NA
TGTTATCCGGAATCACTGGGCGTAAAGCGTCTGTAGGTGGTTAGACAAGTCAACTGTTAAATCTTGAGGCTCAACTTCAAAATCGCAGTCGAAACTGTTTGACTAGAGTATAGTAGGGGTAAAGGGAATTTCCAGTGGAGCGGTGAAATGCGTAGATATTGGAAAGAACACCGATGGCGAAGGCACTTTACTGGGCTATTACTGACACTCAGAGACGAAAGCT	Fall/Winter	0.127159	0.0491087		Cyanobacteria_160			Bacteria	Cyanobacteria	Cyanobacteria/Melainabacteria group													Fall/Winter	Winter/Spring	0.249046	0.00322352			Fall/Winter	Fall/Winter	0.14635	0.0323617
CGTTATCCGGAATCATTGGGCGTAAAGCGCCTGTAGGTTGTTTAATAAGTCTGTTGTTAAAGACTAGGGCTCAACCCTAGAAAAGCAATGGAAACTGTTAGACTAGAGTATGGCAGGGGTAGAGGGAATTTCTAGTGTAGCGGTGAAATGCGTAGATATTAGAAAGAACACCGGTGGCGAAAGCGCTCTACTGGACCATTACTGACACTCAGAGGCGAAAGCT	Fall/Winter	0.126661	0.0500097		Cyanobacteria_135			Bacteria	Cyanobacteria	Cyanobacteria/Melainabacteria group													Fall/Winter	NA	NA	NA			Fall/Winter	NA	NA	NA
CGTTATCCAAAATGATTGGGCGTAAAGTGTTCGTAGGCGGTATTTGTTGTTGTATGTAAAATGTTAGGTTTGTTGCTTAACCTCGCATACAATACTCTTTTACTTGAGTATAATAGAGGATAATAGAATTTTATACGGAGGAGTAAAATCCTATGATTTATGAAGGAATGTCAGTGGCGAAAGCGATTATCTGGATTTTTTACTGACGCTGAGGAACGAAAGCA	Fall/Winter	0.12653	0.0502491		Proteobacteria_6887			Bacteria	Proteobacteria		Gammaproteobacteria	Oceanospirillales	Halomonadaceae	Candidatus Carsonella	Candidatus Carsonella ruddii		Candidatus Carsonella ruddii						Fall/Winter	Spring	0.345042	3.41e-05			Fall/Winter	NA	NA	NA
TGGTCGTCGCTTTTATTGGGCCTAAAACGTCCGTAGCCTGTTTGGTAAATCTGTGGGTAAATCAACTTGCTCAACGGGTTGAATTCTGCAGAGACTGCCAGACTAGGGACCGGGAGAGGTGTGGGGTACTCGAGGGGTAGGGGTAAAATCCTGTCATCCTTCGAGGACCACCAGTTGCGAAGGCGCCACACTGGAACGGATCCGACGGTCAGGGACGAAGCCT	Fall/Winter2019	0.895116	1.83628e-85		archaea_4			Archaea	Euryarchaeota	Diaforarchaea group	Thermoplasmata	Methanomassiliicoccales					Methanomassiliicoccales						Fall/Winter2019	Fall/Winter	0.718171	3.62e-23			Fall/Winter2019	Fall/Winter2019	0.892231	3.89707e-75
CGTAGTTCGGAATTACTGGGCTTAAAGAGTTCGTAGGTGGTTGAAAAAGTTGGTGGTGAAATCCCAGAGCTTAACTCTGGAACTGCCATCAAAACTTTTCAGCTAGAGTTTGATAGAGGAAAGCAGAATTTCTAGTGTAGAGGTGAAATTCGTAGATATTAGAAAGAATACCGATTGCGAAGGCAGCTTTCTGGATCATTACTGACACTGAGGAACGAAAGCA	Fall/Winter2019	0.889564	6.03747e-83		Proteobacteria_5215			Bacteria	Proteobacteria		Alphaproteobacteria	Pelagibacterales	Pelagibacteraceae	Candidatus Pelagibacter	Candidatus Pelagibacter sp. FZCC0015		Candidatus Pelagibacter sp. FZCC0015						Fall/Winter2019	Fall/Winter	0.5947	1.46e-14			Fall/Winter2019	Fall/Winter2019	0.887183	3.7808e-73
CGTTATCCGGAATTATTGGGTTTAAAGGGTCCGTAGGTGGTTTATTAAGTCAGAGGTGAAATACTGCAGCTTAACTGTAGAACTGCCTTTGAAACTGATAGACTTGAGTTATTGTGAAGTAGTTAGAATGTGTAGTGTAGCGGTGAAATGCATAGATATTACACAGAATACCGATTGCGAAGGCAGATTACTAACAATGTACTGACACTGAGGGACGAAAGCG	Fall/Winter2019	0.863148	1.41176e-72		Bacteroidetes_991			Bacteria	Bacteroidetes	FCB group	Flavobacteriia	Flavobacteriales	Flavobacteriaceae	Seonamhaeicola	Seonamhaeicola sp. S2-3		Seonamhaeicola sp. S2-3						Fall/Winter2019	Fall/Winter	0.61941	5.56e-16			Fall/Winter2019	Fall/Winter2019	0.863995	4.21614e-65
CGTTAATCGGAATTACTGGGCGTAAAGCGCGCGTAGGTGGTTTGTTAAGTTGGATGTGAAAGCCCTGGGCTCAACCTAGGAACTGCATCCAAAACTAACTCACTAGAGTACGATAGAGGGAGGTAGAATTCATAGTGTAGCGGTGGAATGCGTAGATATTATGAAGAATACCGGTGGCGAAGGCGGCCTCCTGGATCTGTACTGACACTGAGGTGCGAAAGCG	Fall/Winter2019	0.843715	3.01942e-66		Proteobacteria_2597			Bacteria	Proteobacteria		Gammaproteobacteria	Pseudomonadales	Pseudomonadaceae				Pseudomonadaceae						Fall/Winter2019	Fall/Winter	0.595274	1.36e-14			Fall/Winter2019	Fall/Winter2019	0.838954	6.23572e-58
CGTAGTTCGGAATTACTGGGCTTAAAGAGTTCGTAGGTGGTTGAAAAAGTTGGTGGTGAAATCCCAGAGCTTAACTCTGGAACTGCCATCAAAACTTTTCAGCTAGAGTTTGATAGAGGAAAGCAGAATTTCTAGTGTAGAGGTGAAATTCGTAGATATTAGAAAGAATACCAATTGCGAAGGCAGCTTTCTGGATCAATACTGACACTGAGGAACGAAAGCA	Fall/Winter2019	0.841809	1.13232e-65		Proteobacteria_5215			Bacteria	Proteobacteria		Alphaproteobacteria	Pelagibacterales	Pelagibacteraceae	Candidatus Pelagibacter	Candidatus Pelagibacter sp. FZCC0015		Candidatus Pelagibacter sp. FZCC0015						Fall/Winter2019	Fall/Winter	0.633853	7.16e-17			Fall/Winter2019	Fall/Winter2019	0.838454	8.42022e-58
CGTAGTTCGGAATTACTGGGCTTAAAGAGTTCGTAGGTGGTTGAAAAAGTTGGTGGTGAAATCCCAGAGCTTAACTCTGGAACTGCCATCAAAACTTTTCAGCTAGAGTATGATAGAGGAAAGCAGAATTTCTAGTGTAGAGGTGAAATTCGTAGATATTAGAAAGAATACCAATTGCGAAGGCAGCTTTCTGGATCATTACTGACGCTGAGGAACGAAAGCA	Fall/Winter2019	0.83614	5.21476e-64		Proteobacteria_5215			Bacteria	Proteobacteria		Alphaproteobacteria	Pelagibacterales	Pelagibacteraceae	Candidatus Pelagibacter	Candidatus Pelagibacter sp. FZCC0015		Candidatus Pelagibacter sp. FZCC0015						Fall/Winter2019	Fall/Winter	0.629298	1.38e-16			Fall/Winter2019	Fall/Winter2019	0.829142	1.88932e-55
CGTTAATCGGAATTACTGGGCGTAAAGCGCGCGTAGGTGGTTTTTTAAGTTGGATGTGAAAGCCCTGGGCTCAACCTAGGAACTGCATCCAAAACTAGATGACTAGAGTACGAAAGAGGGAAGTAGAATTCACAGTGTAGCGGTGGAATGCGTAGATATTGTGAAGAATACCAATGGCGAAGGCAGCTTCCTGGTTCTGTACTGACACTGAGGTGCGAAAGCG	Fall/Winter2019	0.820986	7.3801e-60		Proteobacteria_6887			Bacteria	Proteobacteria		Gammaproteobacteria	Oceanospirillales	Halomonadaceae	Candidatus Carsonella	Candidatus Carsonella ruddii		Candidatus Carsonella ruddii						Fall/Winter2019	Fall/Winter	0.579801	9.22e-14			Fall/Winter2019	Fall/Winter2019	0.81861	5.88269e-53
CGTAGTTCGGAATTACTGGGCTTAAAGAGCTCGTAGGTGGTTAAAAAAGTTGATGGTGAAATCCCAAGGCTCAACCTTGGAACTGCCATCAAAACTTTTTAGCTAGAGTATGATAGAGGAAAGTGGAATTTCTAGTGTAGAGGTGAAATTCGTAGATATTAGAAAGAACACCAAATGCGAAGGCAACTTTCTGGATCATTACTGACACTGAGGAGCGAAAGCA	Fall/Winter2019	0.820019	1.31699e-59		Proteobacteria_5215			Bacteria	Proteobacteria		Alphaproteobacteria	Pelagibacterales	Pelagibacteraceae	Candidatus Pelagibacter	Candidatus Pelagibacter sp. FZCC0015		Candidatus Pelagibacter sp. FZCC0015						Fall/Winter2019	Fall/Winter	0.685965	1.64e-20			Fall/Winter2019	Fall/Winter2019	0.811603	2.18981e-51
CGTAGTTCGGAATTACTGGGCTTAAAGAGTTCGTAGGTGGTTGAAAAAGTTGGTGGTGAAATCCCAGAGCTTAACTCTGGAACTGCCATCAAAACTTTTCAGCTAGAGTATGATAGAGGAAAGCAGAATTTCTAGTGTAGAGGTGAAATTCGTAGATATTAGAAAGAATACCGATTGCGAAGGCAGCTTTCTGGATCATTACTGACACTGAGGAACGAAAGCA	Fall/Winter2019	0.809848	4.74497e-57		Proteobacteria_5215			Bacteria	Proteobacteria		Alphaproteobacteria	Pelagibacterales	Pelagibacteraceae	Candidatus Pelagibacter	Candidatus Pelagibacter sp. FZCC0015		Candidatus Pelagibacter sp. FZCC0015						Fall/Winter2019	Fall/Winter	0.445502	4.37e-08			Fall/Winter2019	Fall/Winter2019	0.807851	1.42816e-50
CGTTATCCGGAATTATTGGGTTTAAAGGGTCCGTAGGTGGTTATTTAAGTCAGAGGTGAAATCCTGCCGCTTAACGGCAGAACTGCCTTTGATACTGATTAACTTGAGTTATTGTGAAGTAGTTAGAATATGTAGTGTAGCGGTGAAATGCATAGATATTACATAGAATACCGATTGCGAAGGCAGATTACTAACAATATACTGACACTGAGGGACGAAAGCG	Fall/Winter2019	0.809279	6.52831e-57		Bacteroidetes_994			Bacteria	Bacteroidetes	FCB group	Flavobacteriia	Flavobacteriales	Flavobacteriaceae	Siansivirga	Siansivirga zeaxanthinifaciens	Siansivirga zeaxanthinifaciens CC-SAMT-1	Siansivirga zeaxanthinifaciens CC-SAMT-1						Fall/Winter2019	Fall/Winter	0.571085	2.6e-13			Fall/Winter2019	Fall/Winter2019	0.810006	4.88809e-51
CGTTGTCCGGATTTACTGGGCGTAAAGGGTACGTAGGCGTTTTAATAAGTTGTATGTTAAATATCTTAGCTTAACTAAGAAAGTGCATCCAAAACTGTTAAAATAGAGTTTGAGAGAGGAACGCAGAATTCATGGTGGAGCGGTGACATGCGTAGATATCATGAGGAAAGTCAAATGCGAAGGCAGCCTTCTGGCTCAAAACTGACGCTGAGGTACGAAAGCG	Fall/Winter2019	0.800919	6.26572e-55		Firmicutes_Tenericutes_3832			Bacteria	Firmicutes	Terrabacteria group	Clostridia	Thermoanaerobacterales	Thermoanaerobacterales Family III. Incertae Sedis	Caldicellulosiruptor			Caldicellulosiruptor						Fall/Winter2019	Fall/Winter	0.470825	5.62e-09			Fall/Winter2019	Fall/Winter2019	0.806109	3.36339e-50
CGTAGTTCGGAATTACTGGGCTTAAAGAGTTCGTAGGTGGTTAAAAAAGTTGGTGGTGAAATCCCAGAGCTTAACTCTGGAACTGCCATCAAAACTTTTTAGCTAGAGTATGATAGAGGAAAGCAGAATTTCTAGTGTAGAGGTGAAATTCGTAGATATTAGAAAGAATACCGATTGCGAAGGCAGCTTTCTGGATCATTACTGACGCTGAGGAACGAAAGCA	Fall/Winter2019	0.789545	2.2231e-52		Proteobacteria_5215			Bacteria	Proteobacteria		Alphaproteobacteria	Pelagibacterales	Pelagibacteraceae	Candidatus Pelagibacter	Candidatus Pelagibacter sp. FZCC0015		Candidatus Pelagibacter sp. FZCC0015						Fall/Winter2019	Fall/Winter	0.471636	5.25e-09			Fall/Winter2019	Fall/Winter2019	0.784414	7.32382e-46
CGTTGCTCGGAATTACTGGGCGTAAAGCGAGCGTAGGCGGTTAATCAAGTTGGTGGTGAAAGCCCAGAGCTTAACTCTGGAACTGCCATCAAAACTGGTTGACTAGAGATTGGTAGAGGAAAATGGAATTCCTAGTGTAGAGGTGAAATTCGTAGATATTGGGAAGAACACCAGTGGCGAAGGCGATTTTCTGGGCCAATTCTGACGCTGAGGTTCGAAAGCG	Fall/Winter2019	0.783078	5.34109e-51		Proteobacteria_5049			Bacteria	Proteobacteria		Alphaproteobacteria	Rickettsiales			Rickettsiales endosymbiont of Stachyamoeba lipophora		Rickettsiales endosymbiont of Stachyamoeba lipophora						Fall/Winter2019	Fall/Winter	0.666378	4.66e-19			Fall/Winter2019	Fall/Winter2019	0.775976	2.62242e-44
CGTTGTTCGGAATAACTGGGCGTAAAGGGCGCGTAGGCGGTCTATCCAGTTGGGCGTGAAAGCCCTGGGCTCAACCCAGGAATTGCGTCCAATACTAATAGACTAGAGACCGAGAGAGGATAGTGGAATTTCCAGTGTAGAGGTGAAATTCGTAGATATTGGAAAGAACACCAGTGGCGAAAGCGGCTATCTGGCTCGGTTCTGACGCTGAGGCGCGAAAGCG	Fall/Winter2019	0.770992	1.53107e-48		Proteobacteria_6566			Bacteria	Proteobacteria	SAR116 cluster	Alphaproteobacteria			Candidatus Puniceispirillum	Candidatus Puniceispirillum marinum	Candidatus Puniceispirillum marinum IMCC1322	Candidatus Puniceispirillum marinum IMCC1322						Fall/Winter2019	Fall/Winter	0.506473	2.33e-10			Fall/Winter2019	Fall/Winter2019	0.770207	2.77023e-43
TGGTAGTCGCTTTTATTGGGCCTAAAACGTCCGTAGCCGGTCTGGTACATTCGTGGGTAAATCAACCCGCTCAACGGGTTGAATTCTGCGAGCACGGCCAGACTTGGGACCGGGAGAGGTGTGGGGTACTCTCAGGGTAGGGGTAAAATCCTGTCATCCTGAGAGGACCACCTGTTGCGAAGGCGCCACACTAGAACGGATCCGACGGTCAGGGACGAAACCT	Fall/Winter2019	0.765964	1.45583e-47		archaea_4			Archaea	Euryarchaeota	Diaforarchaea group	Thermoplasmata	Methanomassiliicoccales					Methanomassiliicoccales						Fall/Winter2019	Fall/Winter	0.720646	2.18e-23			Fall/Winter2019	Fall/Winter2019	0.763129	4.55692e-42
CGTTATCCGGAATCATTGGGTTTAAAGGGTCCGTAGGTGGACAGGTAAGTCAGAGGTGAAATCCTGCAGCTCAACTGTAGAACTGCCTTTGATACTGTTTGTCTTGAGTTATTGTGAAGTGGTTAGAATGTGTAGTGTAGCGGTGAAATGCATAGATATTACACAGAATACCGATTGCGAAGGCAGATCACTAACAATTAACTGACACTGATGGACGAAAGCG	Fall/Winter2019	0.764815	2.41741e-47		Bacteroidetes_980			Bacteria	Bacteroidetes	FCB group	Flavobacteriia	Flavobacteriales	Flavobacteriaceae	Winogradskyella	Winogradskyella sp. J14-2		Winogradskyella sp. J14-2						Fall/Winter2019	Fall/Winter	0.687908	1.16e-20			Fall/Winter2019	Fall/Winter2019	0.754324	1.29817e-40
CGTAGTTCGGAATTACTGGGCTTAAAGAGTTCGTAGGTGGTTGAAATAGTTGGTGGTGAAATCCCAGAGCTTAACTCTGGAACTGCCATCAAAACTTTTCAGCTAGAGTATGATAGAGGAAAGCAGAATTTCTAGTGTAGAGGTGAAATTCGTAGATATTAGAAAGAATACCAATTGCGAAGGCAGCTTTCTGGATCATTACTGACGCTGAGGAACGAAAGCA	Fall/Winter2019	0.75948	2.44944e-46		Proteobacteria_5215			Bacteria	Proteobacteria		Alphaproteobacteria	Pelagibacterales	Pelagibacteraceae	Candidatus Pelagibacter	Candidatus Pelagibacter sp. FZCC0015		Candidatus Pelagibacter sp. FZCC0015						Fall/Winter2019	Fall/Winter	0.611579	1.62e-15			Fall/Winter2019	Fall/Winter2019	0.748377	1.15197e-39
CGTAGTTCGGAATTACTGGGCTTAAAGAGTTCGTAGGTGGTTAAAAAAGTTGGTGGTGAAATCCCAGAGCTTAACTCTGGAACTGCCATCAAAACTTTTTAGCTAGAGTATGATAGAGGAAAGCAGAATTTCTAGTGTAGAGGTGAAATTCGTAGATATTAGAAAGAATACCAATTGCGAAGGCAGCTTTCTGGATCATTACTGACACTGAGGAACGAAAGCA	Fall/Winter2019	0.754472	2.04042e-45		Proteobacteria_5215			Bacteria	Proteobacteria		Alphaproteobacteria	Pelagibacterales	Pelagibacteraceae	Candidatus Pelagibacter	Candidatus Pelagibacter sp. FZCC0015		Candidatus Pelagibacter sp. FZCC0015						Fall/Winter2019	Fall/Winter	0.708955	2.27e-22			Fall/Winter2019	Fall/Winter2019	0.741724	1.23326e-38
CGTTATCCGGAATCATTGGGTTTAAAGGGTCCGTAGGCGGTCTATTAAGTCAGAGGTGAAATCCTATCGCTCAACGATAGAACTGCCTTTGATACTGGTAGACTTGAGTTATTGTGAAGTAGTTAGAATGTGTAGTGTAGCGGTGAAATGCATAGATATTACACAGAATACCGATTGCGAAGGCAGATTACTAACAATATACTGACGCTCAGGGACGAAAGCG	Fall/Winter2019	0.75304	3.70438e-45		Bacteroidetes_1111			Bacteria	Bacteroidetes	FCB group	Flavobacteriia	Flavobacteriales	Flavobacteriaceae				Flavobacteriaceae						Fall/Winter2019	Fall/Winter	0.627225	1.86e-16			Fall/Winter2019	Fall/Winter2019	0.743504	6.58709e-39
CGTTAATCGGAATTACTGGGCGTAAAGCGCGCGTAGATGGTTTATTCAGTTGGGTGTGAAATCCCTGGGCTCAACCTAGGAACTGCATTCAAAACTTATAAACTAGAGTACGAAAGAGGAGAGTAGAATTCATGGTGTAGCGGTGAAATGCGTAGAGATCATGAGGAATACCAGTGGCGAAGGCGACTCTCTGGTTCGAGACTGACATTGAGGTGCGAAAGCG	Fall/Winter2019	0.752055	5.57188e-45		Proteobacteria_2607			Bacteria	Proteobacteria		Gammaproteobacteria	Pseudomonadales	Pseudomonadaceae				Pseudomonadaceae						Fall/Winter2019	Fall/Winter	0.48878	1.18e-09			Fall/Winter2019	Fall/Winter2019	0.747132	1.80552e-39
CGTTATCCGGAATTATTGGGTTTAAAGGGTCCGCAGGCTGTTTGTTAAGTCAGAGGTGAAATCCTACCGCTCAACGGTAGAACTGCCTTTGATACTGGCAAACTTGAGTTATTGTGAAGTAGTTAGAATGTGTAGTGTAGCGGTGAAATGCATAGATATTACACAGAATACCGATTGCGAAAGCAGATTACTAACAATATACTGACGCTGAGGGACGAAAGCG	Fall/Winter2019	0.748056	2.865e-44		Bacteroidetes_1110			Bacteria	Bacteroidetes	FCB group	Flavobacteriia	Flavobacteriales	Flavobacteriaceae				Flavobacteriaceae						Fall/Winter2019	Fall/Winter	0.617038	7.7e-16			Fall/Winter2019	Fall/Winter2019	0.748721	1.01702e-39
TGGTCGTCGCTTTTATTGGGCCTAAAACGTCCGTAGCCTGTTTGGTAAATCTATGGGTAAATCAACGAGCTTAACTCGTTGAATTCTGCAGAGACTGCCAGACTAGGGACCGGGAGAGGTATGAGGTACTCTGGGGGTAGGGGTAAAATCCTGTCATCCTCAGAGGACCACCTGTTGCGAAGGCGTCATACTGGAACGGATCCGACGGTCAGGGACGAAGCCT	Fall/Winter2019	0.741628	3.73661e-43		archaea_2			Archaea	Euryarchaeota	Diaforarchaea group	Thermoplasmata	Methanomassiliicoccales					Methanomassiliicoccales						Fall/Winter2019	Fall/Winter	0.432176	1.2e-07			Fall/Winter2019	Fall/Winter2019	0.745639	3.08346e-39
CGTTATCCGGAATTATTGGGCGTAAAGCGTCCGCAGGCGGCTTTTCAAGTCTGCTGTTAAAACGTGGAGCTTAACTCCATCATGGCAGTGGAAACTGAAAGGCTTGAGTATGGTAGGGGCAGAGGGAATTCCCGGTGTAGCGGTGAAATGCGTAGATATCGGGAAGAACACCAGTGGCGAAGGCGCTCTGCTGGGCCATTACTGACGCTCATGGACGAAAGCC	Fall/Winter2019	0.737034	2.23627e-42		Cyanobacteria_231			Bacteria	Cyanobacteria	Cyanobacteria/Melainabacteria group		Synechococcales	Prochloraceae	Prochlorococcus	Prochlorococcus marinus	Prochlorococcus marinus str. MIT 9312	Prochlorococcus marinus str. MIT 9312						Fall/Winter2019	Fall/Winter	0.49153	9.26e-10			Fall/Winter2019	Fall/Winter2019	0.731488	4.12007e-37
CGTTATCCGGAATTATTGGGCGTAAAGCGTCCGCAGGCGGCTTTTCAAGTCTGCTGTTAAAGCGTGGAGCTTAACTCCATCATGGCAGTGGAAACTGAAAGGCTTGAGTATGGTAGGGGCAGAGGGAATTCCCGGTGTAGCGGTGAAATGCGTAGATATCGGGAAGAACACCAGTGGCGAAGGCGCTCTGCTGGGCCATTACTGACGCTCATGGACGAAAGCC	Fall/Winter2019	0.733972	7.2174e-42		Cyanobacteria_236			Bacteria	Cyanobacteria	Cyanobacteria/Melainabacteria group		Synechococcales	Prochloraceae	Prochlorococcus			Prochlorococcus						Fall/Winter2019	Fall/Winter	0.426894	1.78e-07			Fall/Winter2019	Fall/Winter2019	0.734008	1.76346e-37
CGTTATCCGGAATTATTGGGTTTAAAGGGTCCGCAGGCTGTTTGTTAAGTCAGAGGTGAAATCCTACCGCTCAACGGTAGAACTGCCTTTGATACTGGCAAACTTGAGTTATTGTGAAGTAGTTAGAATGTGTAGTGTAGCGGTGAAATGCATAGATATTACACAGAATACCAATTGCGAAGGCAGATTACTAACAATTAACTGACGCTGAGGGACGAAAGCG	Fall/Winter2019	0.725911	1.46197e-40		Bacteroidetes_994			Bacteria	Bacteroidetes	FCB group	Flavobacteriia	Flavobacteriales	Flavobacteriaceae	Siansivirga	Siansivirga zeaxanthinifaciens	Siansivirga zeaxanthinifaciens CC-SAMT-1	Siansivirga zeaxanthinifaciens CC-SAMT-1						Fall/Winter2019	Fall/Winter	0.605643	3.56e-15			Fall/Winter2019	Fall/Winter2019	0.72905	9.28227e-37
CGTAGTTCGGAATTACTGGGCTTAAAGAGTTCGTAGGTGGTTAAAAAAGTTGGTGGTGAAATCCCAGAGCTTAACTCTGGAACTGCCATCAAAACTTTTTAGCTAGAGTATGATAGAGGAAAGCAGAATTTCTAGTGTAGAGGTGAAATTCGTAGATATTAGAAAGAATACCGATTGCGAAGGCAGCTTTCTGGATCATTACTGACACTGAGGAACGAAAGCA	Fall/Winter2019	0.722679	4.74083e-40		Proteobacteria_5215			Bacteria	Proteobacteria		Alphaproteobacteria	Pelagibacterales	Pelagibacteraceae	Candidatus Pelagibacter	Candidatus Pelagibacter sp. FZCC0015		Candidatus Pelagibacter sp. FZCC0015						Fall/Winter2019	Fall/Winter	0.678765	5.79e-20			Fall/Winter2019	Fall/Winter2019	0.725505	2.97589e-36
CGTTAATCGGAATTACTGGGCGTAAAGCGCGCGTAGGTGGTTTATTAAGTTGGATGTGAAATCCCCGGGCTCAACCTGGGAACTGCATCCAAAACTGATTCACTAGAGTACGATAGAGGGAGGTAGAATTCACAGTGTAGCGGTGGAATGCGTAGATATTGTGAAGAATACCAATGGCGAAGGCAGCCTCCTGGATCTGTACTGACACTAAGGTGCGAAAGCG	Fall/Winter2019	0.721255	7.92013e-40		Proteobacteria_2607			Bacteria	Proteobacteria		Gammaproteobacteria	Pseudomonadales	Pseudomonadaceae				Pseudomonadaceae						Fall/Winter2019	Fall/Winter	0.492512	8.47e-10			Fall/Winter2019	Fall/Winter2019	0.71604	6.11832e-35
CGTTGTTCGGAATTACTGGGCGTAAAGCGCACGTAGGTGGATTAGTCAGTCAGAGGTGAAATCCCAGGGCTCAACCCTGGAACTGCCTTTGATACTGCTAGTCTAGAGTTCGAGAGAGGTGAGTGGAATTCCAAGTGTAGAGGTGAAATTCGTAGATATTTGGAGGAACACCAGTGGCGAAGGCGGCTCACTGGCTCGATACTGACACTGAGGTGCGAAAGCG	Fall/Winter2019	0.717323	3.21135e-39		Proteobacteria_6066			Bacteria	Proteobacteria		Alphaproteobacteria	Rhodobacterales	Rhodobacteraceae				Rhodobacteraceae						Fall/Winter2019	Fall/Winter	0.516301	9.07e-11			Fall/Winter2019	Fall/Winter2019	0.710876	3.02431e-34
CGTAGTTCGGAATTACTGGGCTTAAAGAGTTCGTAGGTGGTTAAAAAAGTTGGTGGTGAAATCCCAGAGCTTAACTCTGGAACTGCCATCAAAACTTTTTAGCTAGAGTATGATAGAGGAAAGTAGAATTTCTAGTGTAGAGGTGAAATTCGTAGATATTAGAAAGAATACCAATTGCGAAGGCAGCTTTCTGGATCATTACTGACACTGAGGAACGAAAGCA	Fall/Winter2019	0.711036	2.86916e-38		Proteobacteria_5215			Bacteria	Proteobacteria		Alphaproteobacteria	Pelagibacterales	Pelagibacteraceae	Candidatus Pelagibacter	Candidatus Pelagibacter sp. FZCC0015		Candidatus Pelagibacter sp. FZCC0015						Fall/Winter2019	Fall/Winter	0.361613	1.31e-05			Fall/Winter2019	Fall/Winter2019	0.708256	6.7121e-34
CGTTGTCCGGAATTATTGGGCGTAAAGAGCTCGTAGGCTGTTCAGTAAGTCGGGTGTGAAAACTCAAGGCTCAACCTTGAGACGCCACTCGATACTGCTGTGACTTGAGTCCGGTAGAGGAGTGTGGAATTCCTGGTGTAGCGGTGAAATGCGCAGATATCAGGAGGAACACCAGCGGCGAAGGCGGCACTCTGGGCCGGTACTGACGCTGAGGAGCGAAAGCA	Fall/Winter2019	0.708661	6.46251e-38		Actinobacteria_174			Bacteria	Actinobacteria	Terrabacteria group	Acidimicrobiia	Acidimicrobiales	Ilumatobacteraceae	Ilumatobacter	Ilumatobacter coccineus	Ilumatobacter coccineus YM16-304	Ilumatobacter coccineus YM16-304						Fall/Winter2019	Fall/Winter	0.70599	4.03e-22			Fall/Winter2019	Fall/Winter2019	0.698438	1.23368e-32
CGTAGTTCGGAATTACTGGGCTTAAAGAGCTCGTAGGTGGTTAAAAAAGTTGATGGTGAAATCCCAAGGCTTAACCTTGGAACTGCCATCAAAACTTTTTAGCTAGAGTGTGATAGAGGTAAGTGGAATTTCTAGTGTAGAGGTGAAATTCGTAGATATTAGAAAGAATACCAATTGCGAAGGCAGCTTTCTGGATCATTACTGACACTGAGGAACGAAAGCA	Fall/Winter2019	0.697821	2.37775e-36		Proteobacteria_5215			Bacteria	Proteobacteria		Alphaproteobacteria	Pelagibacterales	Pelagibacteraceae	Candidatus Pelagibacter	Candidatus Pelagibacter sp. FZCC0015		Candidatus Pelagibacter sp. FZCC0015						Fall/Winter2019	Fall/Winter	0.497675	5.29e-10			Fall/Winter2019	Fall/Winter2019	0.68909	1.77122e-31
CGTTGTCCGGAATCACTGGGCGTAAAGGGTCCGTAGGCGTCTTAAAAAGTCATTTGTTAAATACACCGGCTTAACCGGTGACCTGCATTTGAAACTTTTAAGATAGAGTATAGGAGAGGAAAGTGGAATTCCTGGTGTAGCGGTGACATGCGTAGATATCAGGAGGAACACCAATGGCGAAGGCAACTTTCTGGCCTATTACTGACGCTGAGGGACGAAAGCG	Fall/Winter2019	0.69276	1.21152e-35		Firmicutes_Tenericutes_3380			Bacteria	Firmicutes	Terrabacteria group	Clostridia	Halanaerobiales	Halanaerobiaceae				Halanaerobiaceae						Fall/Winter2019	Fall/Winter	0.469923	6.07e-09			Fall/Winter2019	Fall/Winter2019	0.688005	2.3972e-31
CGTAGTTCGGAATTACTGGGCTTAAAGAGTTCGTAGGTGGTTAAAAAAGTTGGTTGTGAAATCCCGGAGCTTAACTCCGGAACTGCAATCAAAACTTTTTAGCTAGAGTATGATAGAGGAAAGCAGAATTTCTAGTGTAGAGGTGAAATTCGTAGATATTAGAAAGAATACCAATTGCGAAGGCAGCTTTCTGGATCATTACTGACGCTGAGGAACGAAAGCA	Fall/Winter2019	0.691959	1.56315e-35		Proteobacteria_5215			Bacteria	Proteobacteria		Alphaproteobacteria	Pelagibacterales	Pelagibacteraceae	Candidatus Pelagibacter	Candidatus Pelagibacter sp. FZCC0015		Candidatus Pelagibacter sp. FZCC0015						Fall/Winter2019	Fall/Winter	0.583225	6.09e-14			Fall/Winter2019	Fall/Winter2019	0.6896	1.53556e-31
TGGTCGTCGCTTTTATTGGGCCTAAAACGTCCGTAGCCTGTTTGGTAAATCTGTGGGTAAATCAATCCGCTCAACGGATTGAATTCTGCAGAGACTGCCAGACTAGGGACCGGGAGAGGTGTGGGGTACTCGAGGGGTAGGGGTAAAATCCTGTCATCCTTTGAGGACCACCAGTTGCGAAGGCGCCACACTGGAACGGATCCGACGGTCAGGGACGAAGCCT	Fall/Winter2019	0.678532	9.89866e-34		archaea_4			Archaea	Euryarchaeota	Diaforarchaea group	Thermoplasmata	Methanomassiliicoccales					Methanomassiliicoccales						Fall/Winter2019	Fall/Winter	0.709878	1.89e-22			Fall/Winter2019	Fall/Winter2019	0.706315	1.20514e-33
CGTTATCCGGAATCATTGGGTTTAAAGGGTCCGTAGGCGGTTTTTTAAGTCAGAGGTGAAATCCTGCAGCTCAACTGTAGAATTGCCTTTGAAACTGAAAGACTTGAGTTATTGTGAAGTGGTTAGAATGTGTGGTGTAGCGGTGAAATGCATAGATATCACACAGAATACCAATTGCGAAGGCAGATCACTAACAATTAACTGACGCTCAGGGACGAAAGCG	Fall/Winter2019	0.678307	1.05917e-33		Bacteroidetes_975			Bacteria	Bacteroidetes	FCB group	Flavobacteriia	Flavobacteriales	Flavobacteriaceae	Kordia			Kordia						Fall/Winter2019	Fall/Winter	0.420879	2.75e-07			Fall/Winter2019	Fall/Winter2019	0.673502	1.2111e-29
CGTTACTCGGATTTACTGGGCGTAAAGGGTCCGTAGGCGGTTCTTTAAGTTAGATGTGAAAGCTTGAAGCTTAACTTCAAAATTGCATCTAAAACTGGAGAACTAGGTTCTTGGAGAGGTTGATGGAATTACCGGTGTAGCGGTGAAATGCGTAGATATCGGTAGGAACACCAGTGGCGAAAGCGATCAACTGGCCAAGTAACGACGCTGAGGGACGAAAGCG	Fall/Winter2019	0.677126	1.50909e-33		Proteobacteria_4233			Bacteria	Proteobacteria		Gammaproteobacteria	Pseudomonadales	Pseudomonadaceae	Permianibacter	Permianibacter aggregans		Permianibacter aggregans						Fall/Winter2019	Fall/Winter	0.560228	9.03e-13			Fall/Winter2019	Fall/Winter2019	0.66886	4.05674e-29
CGTTAATCGGAATTACTGGGCGTAAAGAGCACGTAGGTTGGTATTTAAGTCAGTTGTGAAAGCCTCGAGCTCAACTTGAGAACTGCAATTGAAACTGGATACCTAGAGTTTGGTAGAGGGAAGTGGAATTTCCGAAGTAGCGGTGAAATGCATAGATATCGGAAGGAACACCAGTGGCGAAGGCGGCTTCCTGGACCAATACTGACACTGAGGTGCGAAAGCG	Fall/Winter2019	0.6749	2.9276e-33		Proteobacteria_6776			Bacteria	Proteobacteria		Gammaproteobacteria						Gammaproteobacteria						Fall/Winter2019	Fall/Winter	0.656077	2.46e-18			Fall/Winter2019	Fall/Winter2019	0.667435	5.85369e-29
CGTTAATCGGAATTACTGGGCGTAAAGCGCGCGTAGGCGGTGTGCTAAGTTGGGTGTGAAATCCCCGGGCTTAACCTGGGAACTGCATTCAAAACTTGCATACTGGAGTACGGAAGAGGCGAGTAGAATTCATGGTGTAGCGGTGAAATGCGTAGATATCATGAGGAATACCAATGGCGAAGGCAACTCGCTGGTCCGTAACTGACGCTGAGGTGCGAAAGCG	Fall/Winter2019	0.673923	3.90896e-33		Proteobacteria_6910			Bacteria	Proteobacteria		Gammaproteobacteria	Oceanospirillales	Saccharospirillaceae	Reinekea	Reinekea forsetii		Reinekea forsetii						Fall/Winter2019	Fall/Winter	0.412818	4.86e-07			Fall/Winter2019	Fall/Winter2019	0.668619	4.31698e-29
CGTAGTTCGGAATTACTGGGCTTAAAGAGTTCGTAGGTGGTTGAAAAAGTTAGTGGTGAAATCCCAGAGCTTAACTCTGGAACTGCCATTAAAACTTTTCAGCTAGAGTATGATAGAGGAAAGCAGAATTTCTAGTGTAGAGGTGAAATTCGTAGATATTAGAAAGAATACCAATTGCGAAGGCAGCTTTCTGGATCATTACTGACGCTGAGGAACGAAAGCA	Fall/Winter2019	0.670677	1.01324e-32		Proteobacteria_5215			Bacteria	Proteobacteria		Alphaproteobacteria	Pelagibacterales	Pelagibacteraceae	Candidatus Pelagibacter	Candidatus Pelagibacter sp. FZCC0015		Candidatus Pelagibacter sp. FZCC0015						Fall/Winter2019	NA	NA	NA			Fall/Winter2019	Fall/Winter2019	0.665938	8.58578e-29
CGTTATCCGGAATCATTGGGTTTAAAGGGTCCGTAGGTGGACAAATAAGTCAGAGGTGAAATCCTGCAGCTCAACTGTAGAACTGCCTTTGATACTGTTTGTCTTGAGTTATTATGAAGTGGTTAGAATGTGTAGTGTAGCGGTGAAATGCATAGATATTACACAGAATACCGATTGCGAAGGCAGATCACTAATAATCAACTGACACTGATGGACGAAAGCG	Fall/Winter2019	0.667885	2.27707e-32		Bacteroidetes_978			Bacteria	Bacteroidetes	FCB group	Flavobacteriia	Flavobacteriales	Flavobacteriaceae	Formosa			Formosa						Fall/Winter2019	Fall/Winter	0.3937	1.78e-06			Fall/Winter2019	Fall/Winter2019	0.668279	4.71251e-29
CGTAGTTCGGAATTACTGGGCTTAAAGAGTTCGTAGGTGGTTAAAAAAGTTGGTTGTGAAATCCCGGAGCTTAACTCCGGAACTGCAATCAAAACTTTTTAGCTAGAGTATGATAGAGGAAAGCAGAATTTCTAGTGTAGAGGTGAAATTCGTAGATATTAGAAAGAATACCAATTGCGAAGGCAGCTTTCTGGATCATTACTGACACTGAGGAACGAAAGCA	Fall/Winter2019	0.665866	4.06745e-32		Proteobacteria_5215			Bacteria	Proteobacteria		Alphaproteobacteria	Pelagibacterales	Pelagibacteraceae	Candidatus Pelagibacter	Candidatus Pelagibacter sp. FZCC0015		Candidatus Pelagibacter sp. FZCC0015						Fall/Winter2019	Fall/Winter	0.600268	7.18e-15			Fall/Winter2019	Fall/Winter2019	0.657735	6.73858e-28
CGTTATCCGGAATCATTGGGTTTAAAGGGTCCGCAGGCGGTTTGATAAGTCAGAGGTGAAATCCTACAGCTCAACTGTAGAATTGCCTTTGATACTGTTAAACTTGAGTTATTGTGAAGTAATTAGAATGTGTAGTGTAGCGGTGAAATGCATAGATATTACACAGAATACCGATTGCGAAAGCAGATTACTAACAATACACTGACGCTGAGGGACGAAAGCG	Fall/Winter2019	0.661566	1.37831e-31		Bacteroidetes_1111			Bacteria	Bacteroidetes	FCB group	Flavobacteriia	Flavobacteriales	Flavobacteriaceae				Flavobacteriaceae						Fall/Winter2019	Fall/Winter	0.380875	4.06e-06			Fall/Winter2019	Fall/Winter2019	0.670121	2.92747e-29
TGGTAGTCGATTTTATTGGGCCTAAAACGTCCGTCGCCGGTCTGGTGCATTCGTGGGTAAATCAACCCGCTCAACGGGTTGAATTCTGCGAGCACGGCCAGACTAGGGACCGGGAGAGGTGTAGGGTACGCTCGGGGTAGGGGTAAAATCCTGTCATCCCGAGCGGACCACCTGTTGCGAAGGCGCTACACTAGAACGGATCCGACGGTCAGGGACGAAGCCT	Fall/Winter2019	0.661272	1.49721e-31		archaea_4			Archaea	Euryarchaeota	Diaforarchaea group	Thermoplasmata	Methanomassiliicoccales					Methanomassiliicoccales						Fall/Winter2019	Fall/Winter	0.770885	2.02e-28			Fall/Winter2019	Fall/Winter2019	0.647934	7.27394e-27
CGTTTTCCGGATTTATTGGGTTTAAAGGGTGCGTAGGTGGTTTATTAAGTCAGTGGTGAAATCCTACAGCTCAACTGTAGAACTGCCATTGATACTGGTAAACTTGAGTTTGGTTTAGGTAAGCGGAATTTATGATGTAGCGGTGAAATGCATAGATATCATAAGGAACACCAATAGCGAAGGCAGCTTACTGGACCATAACTGACACTGAGGCACGAAAGCG	Fall/Winter2019	0.65072	2.74255e-30		Bacteroidetes_94			Bacteria	Bacteroidetes	FCB group	Cytophagia	Cytophagales					Cytophagales						Fall/Winter2019	Fall/Winter	0.74681	7.34e-26			Fall/Winter2019	Fall/Winter	0.673686	1.154e-29
TGGTCGTCGCTTTTATTGGGCCTAAAACGTCCGTAGCCTGTTTGGTAAATCTGTGGGTAAATCAACCAGCTCAACTGGTTGAATTCTGCAGAGACTGCCAGACTAGGGACCGGGAGAGGTGTGGGGTACTCGAGGGGTAGGGGTAAAATCCTGTCATCCTTTGAGGACCACCAGTTGCGAAGGCGCCACACTGGAACGGATCCGACGGTCAGGGACGAAGCCT	Fall/Winter2019	0.650335	3.04319e-30		archaea_4			Archaea	Euryarchaeota	Diaforarchaea group	Thermoplasmata	Methanomassiliicoccales					Methanomassiliicoccales						Fall/Winter2019	NA	NA	NA			Fall/Winter2019	Fall/Winter2019	0.648825	5.88031e-27
CGTAGTTCGGAATTACTGGGCTTAAAGAGTTCGTAGGTGGTTGAAAAAGTTGGTGGTGAAATCCCAGAGCTTAACTCTGGAACTGCCATCAAAACTTTTCAGCTAGAGTATGATAGAGGAAAGTAGAATTTCTAGTGTAGAGGTGAAATTCGTAGATATTAGAAAGAATACCGATTGCGAAGGCAGCTTTCTGGATCATTACTGACACTGAGGAACGAAAGCA	Fall/Winter2019	0.649133	4.2056e-30		Proteobacteria_5215			Bacteria	Proteobacteria		Alphaproteobacteria	Pelagibacterales	Pelagibacteraceae	Candidatus Pelagibacter	Candidatus Pelagibacter sp. FZCC0015		Candidatus Pelagibacter sp. FZCC0015						Fall/Winter2019	Fall/Winter	0.382853	3.58e-06			Fall/Winter2019	Fall/Winter2019	0.641323	3.44697e-26
CGTTATCCGGAATCATTGGGCGTAAAGCGCCTGTAGGTTGTTTAATAAGTCTGTTGTTAAAGACTGGGGCTTAACCCCAGGAAAGCAATGGAAACTACTAGACTAGAGTATGGTAGGGGTAAAGGGAATTTCTAGTGTAGCGGTGAAATGCGTAGATATTAGAAAGAACACCGGTGGCGAAAGCGCTTTACTGGACCATTACTGACACTCAGAGGCGAAAGCT	Fall/Winter2019	0.647204	7.04565e-30		Cyanobacteria_135			Bacteria	Cyanobacteria	Cyanobacteria/Melainabacteria group													Fall/Winter2019	Fall/Winter	0.64131	2.38e-17			Fall/Winter2019	Fall/Winter2019	0.643108	2.27339e-26
CGTTGTTCGGAATTACTGGGCGTAAAGAGCGTGTAGGCTGTTAGGTAAGTCAGAGGTGAAATCCCTAAGCTCAACTTAGGAACTGCCTTTGATACTATCTTACTAGAGATCGAGAGAAGTTAGCGGAATTCCAAGTGTAGAGGTGAAATTCGTAGATATTTGGAAGAACACCAGTGGCGAAAGCGGCTAACTGGCTCGATTCTGACGCTAAGACGCGAAAGCG	Fall/Winter2019	0.646072	9.52156e-30		Proteobacteria_6565			Bacteria	Proteobacteria		Alphaproteobacteria	Rhodospirillales	Rhodospirillaceae	Candidatus Endolissoclinum	Candidatus Endolissoclinum faulkneri		Candidatus Endolissoclinum faulkneri						Fall/Winter2019	Fall/Winter	0.377673	4.96e-06			Fall/Winter2019	Fall/Winter2019	0.645183	1.39626e-26
CGTAGTTCGGAATTACTGGGCTTAAAGAGTTCGTAGGTGGTTGAAATAGTTGGTGGTGAAATCCCAGAGCTTAACTCTGGAACTGCCATCAAAACTTTTCAGCTAGAGTATGATAGAGGAAAGCAGAATTTCTAGTGTAGAGGTGAAATTCGTAGATATTAGAAAGAATACCGATTGCGAAGGCAGCTTTCTGGATCATTACTGACACTGAGGAACGAAAGCA	Fall/Winter2019	0.643358	1.95014e-29		Proteobacteria_5216			Bacteria	Proteobacteria		Alphaproteobacteria	Pelagibacterales	Pelagibacteraceae	Candidatus Pelagibacter	Candidatus Pelagibacter ubique	Candidatus Pelagibacter ubique HTCC1062	Candidatus Pelagibacter ubique HTCC1062						Fall/Winter2019	Fall/Winter	0.316691	0.00015413			Fall/Winter2019	Fall/Winter2019	0.642725	2.48606e-26
CGTTGTTCGGAATTACTGGGCGTAAAGCGCGCGTAGGCGGATTAGACAGTTGAGGGTGAAATCCCGGAGCTTAACTTCGGAACTGCCCCCAATACTACTAATCTAGAGTTCGGAAGAGGTGAGTGGAATTCCTAGTGTAGAGGTGAAATTCGTAGATATTAGGAAGAACATCAGAGGCGAAGGCGGCTCACTGGTCCGATACTGACGCTAAGGTGCGAAAGCG	Fall/Winter2019	0.635788	1.38636e-28		Proteobacteria_5854			Bacteria	Proteobacteria		Alphaproteobacteria	Rhodobacterales	Rhodobacteraceae	Roseicitreum	Roseicitreum antarcticum		Roseicitreum antarcticum						Fall/Winter2019	Fall/Winter	0.545593	4.52e-12			Fall/Winter2019	Fall/Winter2019	0.626442	9.98996e-25
CGTAGTTCGGAATTACTGGGCTTAAAGAGTTCGTAGGTTGTTGAAAAAGTTGGTGGTGAAATCCCAGAGCTTAACTCTGGAACTGCCATCAAAACTTTTCAGCTAGAGTATGATAGAGGAAAGCAGAATTTCTAGTGTAGAGGTGAAATTCGTAGATATTAGAAAGAATACCAATTGCGAAGGCAGCTTTCTGGATCATTACTGACACTGAGGAACGAAAGCA	Fall/Winter2019	0.632622	3.09935e-28		Proteobacteria_5215			Bacteria	Proteobacteria		Alphaproteobacteria	Pelagibacterales	Pelagibacteraceae	Candidatus Pelagibacter	Candidatus Pelagibacter sp. FZCC0015		Candidatus Pelagibacter sp. FZCC0015						Fall/Winter2019	Fall/Winter	0.353879	2.06e-05			Fall/Winter2019	Fall/Winter2019	0.627193	8.46561e-25
CGTTAATCGGAATTACTGGGCGTAAAGCGCGCGTAGGTGGTTTATTAAGTTGGGTGTGAAAGCCCCGGGCTCAACCTGGGAACTGCATCCAAAACTGATTCACTAGAGTACGAAAGAGGAAAGTAGAATTCACAGTGTAGCGGTGGAATGCGTAGATATTGTGAAGAATACCGATGGCGAAGGCAGCTTTCTGGTTCTGTACTGACACTGAGGTGCGAAAGCG	Fall/Winter2019	0.632583	3.12942e-28		Proteobacteria_2611			Bacteria	Proteobacteria		Gammaproteobacteria	Cardiobacteriales	Cardiobacteriaceae				Cardiobacteriaceae						Fall/Winter2019	Fall/Winter	0.665428	5.45e-19			Fall/Winter2019	Fall/Winter2019	0.61633	8.88991e-24
CGTTGTCCGGATTTATTGGGTTTAAAGGGTACGTAGGCGGCCAATTAAGTCAGTGGTGAAAGCCAGCAGCTCAACTGTTGAACTGCCATTGATACTGATTGGCTCGAGTTCTGTTAAGGTAGGCGGAATTGATGGTGTAGCGGTGAAATGCATAGATACCATCAGGAACACCGATTGCGAAGGCAGCTTACTAGGCAGAAACTGACGCTAATGTACGAAAGCG	Fall/Winter2019	0.630744	4.97202e-28		Bacteroidetes_1156			Bacteria	Bacteroidetes	FCB group							FCB group						Fall/Winter2019	Fall/Winter	0.71432	7.86e-23			Fall/Winter2019	Fall/Winter2019	0.664252	1.31834e-28
CGTTATCCGGAATTATTGGGTTTAAAGGGTCCGCAGGCGGTTTTTTAAGTCAGAGGTGAAATCCTACAGCTCAACTGTAGAATTGCCTTTGATACTGAAAGACTTGAGTTATTGTGAAGTGGTTAGAATGTGTGGTGTAGCGGTGAAATGCATAGATATCACACAGAATACCAATTGCGAAGGCAGATCACTAACAATTAACTGACGCTCAGGGACGAAAGCG	Fall/Winter2019	0.62919	7.33446e-28		Bacteroidetes_975			Bacteria	Bacteroidetes	FCB group	Flavobacteriia	Flavobacteriales	Flavobacteriaceae	Kordia			Kordia						Fall/Winter2019	Fall/Winter	0.633414	7.63e-17			Fall/Winter2019	Fall/Winter2019	0.611624	2.39405e-23
CGTAGTTCGGAATTACTGGGCTTAAAGAGCTCGTAGGTGGTTAAAATAGTTGATGGTGAAATCCCAAGGCTCAACCTTGGAACTGCCATCAAAACTTTTTAGCTAGAGTGTGATAGAGGAAAGTGGAATTTCTAGTGTAGAGGTGAAATTCGTAGATATTAGAAAGAACACCAAATGCGAAGGCAACTTTCTGGGTCACTACTGACACTGAGGAGCGAAAGCA	Fall/Winter2019	0.626973	1.27228e-27		Proteobacteria_5215			Bacteria	Proteobacteria		Alphaproteobacteria	Pelagibacterales	Pelagibacteraceae	Candidatus Pelagibacter	Candidatus Pelagibacter sp. FZCC0015		Candidatus Pelagibacter sp. FZCC0015						Fall/Winter2019	Fall/Winter	0.313036	0.000185274			Fall/Winter2019	Fall/Winter2019	0.618321	5.81639e-24
TGTTATTCAGAATTATTGGGCGTAAAGGGCATGTAGGTGGATAGTTGTTGTTGATTGTGCCATTCCAATTGTTAGCATTGGGTTTGCAATCAATACACTTTATCTTGAGATCAAAAGAGGAAGATAGAATTTCTAGTGGAGAGGTTAAATTCTTAGATATTAGAAGGAATATCAAGTGCGAAGGCAATCTTCTGGTTTGTATCTGACACTGAGGTGCGAAAGCG	Fall/Winter2019	0.614736	2.45959e-26		Proteobacteria_6887			Bacteria	Proteobacteria		Gammaproteobacteria	Oceanospirillales	Halomonadaceae	Candidatus Carsonella	Candidatus Carsonella ruddii		Candidatus Carsonella ruddii						Fall/Winter2019	Fall/Winter	0.394755	1.66e-06			Fall/Winter2019	Fall/Winter2019	0.620103	3.96899e-24
TGGTAGTCGCTTTTATTGGGCCTAAAACGTCCGTAGCCGGTTTGGTACATTCGTGGGTAAATCAACTCGCTCAACGAGTTGAATTCTGCGAGGACGGCCAGACTTGGGACCGGGAGAGGTGTGGGGTACTCTCAGGGTAGGGGTAAAATCCTGTCATCCTGAGAGGACCACCTGTTGCGAAGGCTCCACACTAGAACGGATCCGACGGTCAGGGACGAAGCCT	Fall/Winter2019	0.613228	3.51211e-26		archaea_4			Archaea	Euryarchaeota	Diaforarchaea group	Thermoplasmata	Methanomassiliicoccales					Methanomassiliicoccales						Fall/Winter2019	Fall/Winter	0.35155	2.36e-05			Fall/Winter2019	Fall/Winter2019	0.604272	1.08906e-22
CGTTGTTCGGAATCACTGGGCGTAAAGCGTGCGTAGGCGGCGCAGTAAGTCAGATGTGAAATCTCTGGGCTCAACCCGGAAACTGCATCCGATACTGCTGCGCTAGAGTAATGGAGGGGTAGCTGGAATTCTCGGTGTAGCAGTGAAATGCGTAGATATCGAGAGGAACACTCGTGGCGAAGGCGAGCTACTGGACATTTACTGACGCTGAGGCACGAAGGCC	Fall/Winter2019	0.613205	3.53153e-26		Verrucomicrobia_24			Bacteria	Verrucomicrobia	PVC group	Verrucomicrobiae	Verrucomicrobiales	Verrucomicrobiaceae	Luteolibacter	Luteolibacter luteus		Luteolibacter luteus						Fall/Winter2019	Fall/Winter	0.439567	6.89e-08			Fall/Winter2019	Fall/Winter2019	0.616669	8.27314e-24
CGTTATCCGGATTTATTGGGTTTAAAGGGTCCGCAGGCGGATCAATAAGTCAGTGGTGAAAGCCCATAGCTCAACTATGGAACTGCCATTGAAACTGTTGATCTTGAGTCTAGTTGACGTAGGCGGAATGTGACATGTAGCGGTGAAATGCATAGATATGTCACAGAACACCAATTGCGAAGGCAGCTTACGAAACTAGACTGACGCTCATGGACGAAAGCG	Fall/Winter2019	0.611057	5.8442e-26		Bacteroidetes_518			Bacteria	Bacteroidetes	FCB group	Flavobacteriia	Flavobacteriales	Schleiferiaceae	Owenweeksia	Owenweeksia hongkongensis	Owenweeksia hongkongensis DSM 17368	Owenweeksia hongkongensis DSM 17368						Fall/Winter2019	Fall/Winter	0.490495	1.02e-09			Fall/Winter2019	Fall/Winter2019	0.628751	5.99564e-25
CGTTATCCGGAATCATTGGGTTTAAAGGGTCCGTAGGTGGTTAATTAAGTCAGAGGTGAAAGCCTATCGCTCAACGATAGAACTGCCTTTGATACTGATTAACTTGAGTTATTGTGAAGTAGTTAGAATATGTAGTGTAGCGGTGAAATGCATAGATATTACATAGAATACCGATTGCGAAGGCAGATTACTAACAATATACTGACACTGAGGGACGAAAGCG	Fall/Winter2019	0.605226	2.25153e-25		Bacteroidetes_1027			Bacteria	Bacteroidetes	FCB group	Flavobacteriia	Flavobacteriales	Flavobacteriaceae				Flavobacteriaceae						Fall/Winter2019	Fall/Winter	0.458318	1.58e-08			Fall/Winter2019	Fall/Winter2019	0.605034	9.32611e-23
CGTAGTTCGGAATTACTGGGCTTAAAGAGCTCGTAGGTGGTTAAAAAAGTTGATGGTGAAATCCCAAGGCTCAACCTTGGAACTGCCATCAAAACTTTTTAGCTAGAGTGTGATAGAGGTAAGTGGAATTTCTAGTGTAGAGGTGAAATTCGTAGATATTAGAAAGAATACCAATTGCGAAGGCAGCTTTCTGGATCATTACTGACACTGAGGAACGAAAGCA	Fall/Winter2019	0.603728	3.16943e-25		Proteobacteria_5215			Bacteria	Proteobacteria		Alphaproteobacteria	Pelagibacterales	Pelagibacteraceae	Candidatus Pelagibacter	Candidatus Pelagibacter sp. FZCC0015		Candidatus Pelagibacter sp. FZCC0015						Fall/Winter2019	Fall/Winter	0.502138	3.5e-10			Fall/Winter2019	Fall/Winter2019	0.593603	9.16465e-22
CGTTGTCCGGAATTATTGGGCGTAAAGAGCTCGTAGGCGGTTTGTCGCGTCTGCTGTGAAAATCCGAGGCTCAACCTCGGACCTGCAGTGGGTACGGGCAAACTAGAGTGCGGTAGGGGAGATTGGAATTCCTGGTGTAGCGGTGGAATGCGCAGATATCAGGAGGAACACCGATGGCGAAGGCAGATCTCTGGGCCGTAACTGACGCTGAGGAGCGAAAGCG	Fall/Winter2019	0.596489	1.614e-24		Actinobacteria_1934			Bacteria	Actinobacteria	Terrabacteria group	Actinobacteria	Micrococcales	Microbacteriaceae				Microbacteriaceae						Fall/Winter2019	Fall/Winter	0.338686	4.84e-05			Fall/Winter2019	Fall/Winter2019	0.592293	1.18417e-21
CGTTAATCGGAATTACTGGGCGTAAAGCGCGCGTAGGTGGTTTGTTAAGTTGGATGTGAAAGCCCTGGGCTCAACCTAGGAACTGCATCCAAAACTGGCTAACTAGAGTACGATAGAGGGAGGTAGAATTCATAGTGTAGCGGTGGAATGCGTAGATATTATGAAGAATACCAGTGGCGAAGGCGGCCTCCTGGATCTGTACTGACACTGAGGTGCGAAAGCG	Fall/Winter2019	0.594767	2.3631e-24		Proteobacteria_2589			Bacteria	Proteobacteria		Gammaproteobacteria	Pseudomonadales	Pseudomonadaceae				Pseudomonadaceae						Fall/Winter2019	Fall/Winter	0.342563	3.91e-05			Fall/Winter2019	Fall/Winter2019	0.598679	3.36001e-22
CGTTGTTCGGAATTATTGGGCGTAAAGGGCGCGCAGGCGGTTTGGATAGTTAGACGTGAAAGCCCTGGGCTTAACCTAGGAACTGCGTTTAATACTGTCAAACTAGAGAACTAGAGAGGATAGCGGAACTCCCAGTGTAGAGGTGAAATTCGTAGATATTGGGAAGAACATCAGTGGCGAAAGCGGCTGTCTGGCTAGTTTCTGACGCTGAGGCGCGAAAGCG	Fall/Winter2019	0.591398	4.94828e-24		Proteobacteria_5223			Bacteria	Proteobacteria		Alphaproteobacteria						Alphaproteobacteria						Fall/Winter2019	Fall/Winter	0.296903	0.000405967			Fall/Winter2019	Fall/Winter2019	0.594318	7.96634e-22
CGTTGTCCGGATTTATTGGGCGTAAAGAGCTCGTAGGCTGTTCAGTAAGTCAGGTGTGAAAACTCGAGGCTCAACCTCGAGACGCCACCTGAAACTGCTGTGACTAGAGTCCGGTAGGGGAGTGTGGAATTCCTGGTGTAGCGGTGAAATGCGCAGATATCAGGAGGAACACCAGCAGCGAAGGCGGCACTCTGGGCCGGTACTGACGCTCAGGAGCGAAAGCA	Fall/Winter2019	0.591252	5.10824e-24		Actinobacteria_174			Bacteria	Actinobacteria	Terrabacteria group	Acidimicrobiia	Acidimicrobiales	Ilumatobacteraceae	Ilumatobacter	Ilumatobacter coccineus	Ilumatobacter coccineus YM16-304	Ilumatobacter coccineus YM16-304						Fall/Winter2019	Fall/Winter	0.436759	8.53e-08			Fall/Winter2019	Fall/Winter2019	0.591588	1.35853e-21
CGTTGTTCGGAATTACTGGGCGTAAAGGGCGCGTAGGCGGTCTTTTAAGTTAGGCGTGAAAGCCCCGGGCTCAACCCGGGAACTGCGCTTAAAACTGGAAGACTAGAAAACGGAAGAGGGTAGTGGAATTCCCAGTGTAGAGGTGAAATTCGTAGATATTGGGAAGAACACCAGTGGCGAAAGCGGCTACCTGGTCCGATTTTGACGCTGAGGCGCGAAAGCG	Fall/Winter2019	0.58539	1.81004e-23		Proteobacteria_6566			Bacteria	Proteobacteria	SAR116 cluster	Alphaproteobacteria			Candidatus Puniceispirillum	Candidatus Puniceispirillum marinum	Candidatus Puniceispirillum marinum IMCC1322	Candidatus Puniceispirillum marinum IMCC1322						Fall/Winter2019	Fall/Winter	0.545113	4.76e-12			Fall/Winter2019	Fall/Winter2019	0.578155	1.74709e-20
CGTTGTTCGGAATTACTGGGCGTAAAGGGAGCGCAGGCGGTTCATTCAGTTAGGCGTGAAAGCCCCGGGCTCAACCTGGGAACTGCGCTTAATACTGATGAGCTAGAAAACAGGAGAGGGTAGTGGAATTTCCAGTGTAGAGGTGAAATTCGTAGATATTGGAAAGAACACCGGTGGCGAAAGCGGCTACCTGGCCTGGTTTTGACGCTGAGGCTCGAAAGCG	Fall/Winter2019	0.584757	2.07184e-23		Proteobacteria_6566			Bacteria	Proteobacteria	SAR116 cluster	Alphaproteobacteria			Candidatus Puniceispirillum	Candidatus Puniceispirillum marinum	Candidatus Puniceispirillum marinum IMCC1322	Candidatus Puniceispirillum marinum IMCC1322						Fall/Winter2019	Fall/Winter	0.519037	6.94e-11			Fall/Winter2019	Fall/Winter2019	0.581557	9.25228e-21
CGTTGTCCGGAATCATTGGGCGTAAAGGGTGCGTAGGCGTCTTTGTAAGCATTGATTGAAATCCTTCGGCTTAACCGGAGAACTGGTCAGTGAACTGCAAGGATAGAGTTTGGTAGAGGAAAGTGGAATTCCCGGTGTAGCGGTGAAATGCGTAGATATCGGGAGGAACATCGACGGCGAAGGCAGCTTTCTGGGCCAATACTGACGCTGAGGCACGAAAGCG	Fall/Winter2019	0.582497	3.34785e-23		phylum_reps_2497																		Fall/Winter2019	Fall/Winter	0.383212	3.5e-06			Fall/Winter2019	Fall/Winter2019	0.582275	8.08288e-21
CGTAGTTCGGAATTACTGGGCTTAAAGAGTTCGTAGGTTGTTGAAAAAGTTGGTGGTGAAATCCCAGAGCTTAACTCTGGAACTGCCATCAAAACTTTTCAGCTAGAGTATGATAGAGGAAAGCAGAATTTCTAGTGTAGAGGTGAAATTCGTAGATATTAGAAAGAATACCGATTGCGAAGGCAGCTTTCTGGATCATTACTGACACTGAGGAACGAAAGCA	Fall/Winter2019	0.577232	1.00931e-22		Proteobacteria_5215			Bacteria	Proteobacteria		Alphaproteobacteria	Pelagibacterales	Pelagibacteraceae	Candidatus Pelagibacter	Candidatus Pelagibacter sp. FZCC0015		Candidatus Pelagibacter sp. FZCC0015						Fall/Winter2019	Fall/Winter	0.295757	0.000428483			Fall/Winter2019	Fall/Winter2019	0.573001	4.51393e-20
CGTTATCCGGAATCATTGGGCGTAAAGCGCCTGTAGGTTGTTTAATAAGTCTGTTGTTAAAGACTAGGGCTTAACCCTAGGAAAGCAATGGAAACTACTAGACTTGAGTATGGCAGGGGTAGAGGGAATTTCTAGTGTAGCGGTGAAATGCGTAGATATTAGAAAGAACACCGGTGGCGAAAGCGCTCTACTGGACCATTACTGACACTCAGAGGCGAAAGCT	Fall/Winter2019	0.576955	1.06896e-22		Cyanobacteria_148			Bacteria	Cyanobacteria	Cyanobacteria/Melainabacteria group		Synechococcales					Synechococcales						Fall/Winter2019	Fall/Winter	0.474518	4.11e-09			Fall/Winter2019	Fall/Winter2019	0.570474	7.14556e-20
CGTTATCCGGAATCATTGGGTTTAAAGGGTCCGTAGGCGGTTTTTTAAGTCAGAGGTGAAATCCTGCAGCTCAACTGTAGAATTGCCTTTGAAACTGAAAGACTTGAGTTATTGTGAAGTGGTTAGAATGTGTGGTGTAGCGGTGAAATGCATAGATATCACACAGAATACCAATTGCGAAGGCAGATCACTAACAATATACTGACGCTCAGGGACGAAAGCG	Fall/Winter2019	0.575963	1.31287e-22		Bacteroidetes_975			Bacteria	Bacteroidetes	FCB group	Flavobacteriia	Flavobacteriales	Flavobacteriaceae	Kordia			Kordia						Fall/Winter2019	Fall/Winter	0.382155	3.74e-06			Fall/Winter2019	Fall/Winter2019	0.571588	5.83922e-20
CGTTGTTCGGAATTACTGGGCGTAAAGAGTATGTAGGCGGAATAGAAAGTTAGAAGTGAAATCCCTGGGCTCAACCTAGGAATTGCTTTTAAAACTCCTATTCTAGAATTCAGGAGAGGATAGTGGAATTTCCAGTGTAGAGGTGAAATTCGTAGATATTGGAAGGAACACCAGTGGCGAAGGCGGCTATCTGGACTGACATTGACGCTGAGATACGAAGGCA	Fall/Winter2019	0.573378	2.23549e-22		Proteobacteria_5170			Bacteria	Proteobacteria		Alphaproteobacteria	Rickettsiales	Anaplasmataceae	Wolbachia			Wolbachia						Fall/Winter2019	Fall/Winter	0.334157	6.19e-05			Fall/Winter2019	Fall/Winter2019	0.571211	6.2525e-20
CGTAGTTCGGAATTACTGGGCTTAAAGAGTTCGTAGGTGGTTAAAAAAGTTGGTTGTGAAATCCCGGAGCTTAACTCCGGAACTGCAATCAAAACTTTTTAGCTAGAGTATGATAGAGGAAAGCAGAATTTCTAGTGTAGAGGTGAAATTCGTAGATATTAGAAAGAATACCGATTGCGAAGGCAGCTTTCTGGATCATTACTGACACTGAGGAACGAAAGCA	Fall/Winter2019	0.571416	3.33813e-22		Proteobacteria_5215			Bacteria	Proteobacteria		Alphaproteobacteria	Pelagibacterales	Pelagibacteraceae	Candidatus Pelagibacter	Candidatus Pelagibacter sp. FZCC0015		Candidatus Pelagibacter sp. FZCC0015						Fall/Winter2019	Fall/Winter	0.383569	3.42e-06			Fall/Winter2019	Fall/Winter2019	0.568798	9.67009e-20
CGTTGTTCGGAATTACTGGGCGTAAAGGGCGCGTAGGCGGTATAATTAGTCAGAGGTGAAATCCCTAAGCTTAACTTAGGAACTGCCTTTGATACTGTTATACTAGAGAACGAGAGAGGTGAGTGGAATTCCAAGTGTAGAGGTGAAATTCGTAGATATTTGGAAGAACACCAGTGGCGAAAGCGGCTCACTGGCTCGTTTCTGACGCTGAGGCGCGAAAGCG	Fall/Winter2019	0.56972	4.71042e-22		Proteobacteria_5615			Bacteria	Proteobacteria		Alphaproteobacteria	Rhizobiales		Methyloceanibacter	Methyloceanibacter sp. wino2		Methyloceanibacter sp. wino2						Fall/Winter2019	Fall/Winter	0.481547	2.24e-09			Fall/Winter2019	Fall/Winter2019	0.56393	2.3055e-19
CGTAGTTCGGAATTACTGGGCTTAAAGAGTTCGTAGGTTGTTAAAAAAGTTGGTGGTGAAATCCCAGAGCTCAACTCTGGAACTGCCATCAAAACTTTTTAGCTAGAGTATGATAGAGGAAAGCAGAATTTCTAGTGTAGAGGTGAAATTCGTAGATATTAGAAAGAATACCAATTGCGAAGGCAGCTTTCTGGATCATTACTGACGCTGAGGAACGAAAGCA	Fall/Winter2019	0.567996	6.67146e-22		Proteobacteria_5215			Bacteria	Proteobacteria		Alphaproteobacteria	Pelagibacterales	Pelagibacteraceae	Candidatus Pelagibacter	Candidatus Pelagibacter sp. FZCC0015		Candidatus Pelagibacter sp. FZCC0015						Fall/Winter2019	Fall/Winter	0.338906	4.78e-05			Fall/Winter2019	Fall/Winter2019	0.564155	2.21532e-19
CGTTGTCCGGATTTATTGGGCGTAAAGGGCTCGTAGGCGGTTTGGTAAGTCGGGTGTGAAAACTCAGGGCTCAACTCTGAGACGCCACTCGATACTGCCATGACTAGAGTCCGGTAGGGGAGTGCGGAATTCCTGGTGTAGCGGTGAAATGCGCAGATATCAGGAGGAACACCGACAGCGAAGGCAGCACTCTGGGCCGGTACTGACGCTGAGGAGCGAAAGCG	Fall/Winter2019	0.560801	2.78982e-21		Actinobacteria_173			Bacteria	Actinobacteria	Terrabacteria group	Acidimicrobiia	Acidimicrobiales	Acidimicrobiaceae	Acidimicrobium	Acidimicrobium ferrooxidans	Acidimicrobium ferrooxidans DSM 10331	Acidimicrobium ferrooxidans DSM 10331						Fall/Winter2019	Fall/Winter	0.480476	2.46e-09			Fall/Winter2019	Fall/Winter2019	0.595795	5.95528e-22
CGTTGTTCGGATTGACTGGGCGTAAAGCGCATGTAGGCGGGCTAATAAGTCAGTTGTGAAAGCCCCGGGCTCAACCTGGGAACTGCAATTGAAACTGTTAGTCTTGAATATCTGAGGGGTTGATGGAATTCCAGGTGTAGCAGTGAAATGCGTAGATATCTGGAGGAACACCAGCGGCGAAGGCGGTCAACTGGCAGAATATTGACGCTGAGATGCGAAAGCG	Fall/Winter2019	0.559692	3.46738e-21		Proteobacteria_4399			Bacteria	Proteobacteria		Oligoflexia	Bdellovibrionales	Bdellovibrionaceae	Bdellovibrio			Bdellovibrio						Fall/Winter2019	Fall/Winter	0.584802	5.03e-14			Fall/Winter2019	Fall/Winter2019	0.551551	1.97206e-18
CGTTGTCCGGATTTATTGGGCGTAAAGAGCTCGTAGGCGGTTCAACAAGTCGGTCGTGAAAGTTCAGGGCTCAACCCTGAAATGTCGATCGATACTGTTGTGACTAGGATACGGCAGAGGTGAGTGGAATTCCGAGTGTAGCGGTGAAATGCGTAGATATTCGGAGGAACACCAATTGCGAAGGCAGCTCACTGGGCCGCTATCGACGCTGAGGAGCGAAAGCT	Fall/Winter2019	0.551121	1.81192e-20		Actinobacteria_177			Bacteria	Actinobacteria	Terrabacteria group	Acidimicrobiia	Acidimicrobiales					Acidimicrobiales						Fall/Winter2019	Fall/Winter	0.552205	2.2e-12			Fall/Winter2019	Fall/Winter	0.388429	4.06525e-09
CGTTAATCGGAATTACTGGGCGTAAAGCGCGCGTAGGTGGTTTTATAAGCTAGCTGTGAAAGCCCCGGGCTTAACCTGGGAACTGCAGTTAGAACTGTTTGACTAGAGTATAATAGAGGGTGGCGGAATTTCCTGTGTAGCGGTGAAATGCGTAGATATAGGAAGGAACATCAGTGGCGAAGGCGGCCACCTGGATTAATACTGACACTGAGGTGCGAAAGCG	Fall/Winter2019	0.550401	2.07743e-20		Proteobacteria_1599			Bacteria	Proteobacteria		Gammaproteobacteria	Alteromonadales	Alteromonadaceae	Marinobacter	Marinobacter sp. CP1		Marinobacter sp. CP1						Fall/Winter2019	Fall/Winter	0.528269	2.76e-11			Fall/Winter2019	Fall/Winter2019	0.53569	2.71802e-17
CGTTGTCCGGAATTATTGGGCGTAAAGGGTCCGTAGGCCGTTTGGTCAGTCTCCTGTGAAATCTCTAGGCTCAACCTAGAGAGGTCGGGAGATACTGCTAAACTAGAGATTGTCAGAGGCAAGTGGAATTCCCGGTGTAGTGGTGAAATGCGTAGATATCGGGAGGAACATCAATGGCGAAAGCAGCTTGCTGGGGCAATTCTGACGCTGAGGGACGAAAGCG	Fall/Winter2019	0.547943	3.30517e-20		phylum_reps_2497																		Fall/Winter2019	Fall/Winter	0.425705	1.94e-07			Fall/Winter2019	Fall/Winter2019	0.545341	5.60011e-18
CGTTGTCCGGAATTATTGGGCGTAAAGGGTCCGTAGGCGTCTTTATAAGTCATCTGTTAAAGACATCGGCTTAACCGATGAAATGCAGTTGAAACTGTAGAGATAGAGTATAGGAGAGGAAAGTGGAATTCCTGGTGTAGCGGTGACATGCGTAGATATCAGGAGGAACACCAATGGCGAAGGCAACTTTCTGGCCTATTACTGACGCTGATGGACGAAAGCG	Fall/Winter2019	0.546862	4.04863e-20		Firmicutes_Tenericutes_3743			Bacteria	Firmicutes	Terrabacteria group	Tissierellia	Tissierellales	Gottschalkiaceae	Gottschalkia	Gottschalkia acidurici	Gottschalkia acidurici 9a	Gottschalkia acidurici 9a						Fall/Winter2019	Fall/Winter	0.310159	0.000213803			Fall/Winter2019	Fall/Winter2019	0.554027	1.29293e-18
CGTTGTTCGGAATCATTGGGCGTAAAGCGTATGTAGGCGGATCAAAAAGTTAGATGTGAAATCCCTGGGCTCAACCCAGGAACTGCGTTTAAAACTAGTGATCTAGAATTTGGTAGGGGTTAGTAGAATTTCCAGTGTAGAGGTGAAATTCGTAGATATTGGAAAGAATACCAGTGGCGAAGGCGACTAACTGGGCCATTTTTGACGCTGAGATACGAAAGCG	Fall/Winter2019	0.545876	4.86906e-20		Proteobacteria_5223			Bacteria	Proteobacteria		Alphaproteobacteria						Alphaproteobacteria						Fall/Winter2019	Fall/Winter	0.328296	8.46e-05			Fall/Winter2019	Fall/Winter2019	0.542191	9.43133e-18
[truncated: 438 more rows]
